# Supplementary material for: Substrate stiffness impacts early biofilm formation by modulating Pseudomonas aeruginosa twitching motility
Source: eLife. 2023 May 9;12:e81112. doi: 10.7554/eLife.81112 (PMC10259483; doi:10.7554/eLife.81112)
Supplement: Figure 2—source data 1. [file elife-81112-fig2-data1.xlsx]

## Sheet: Coverage analysis
	PAO1 WT - Normalized surface coverage A(t) and explored surface area S(t) measured from segmented binary images (moving average over 10 data points) E1=2.7 kPa E2= 6.1 kPa E3=18.5 kPa E4=65 kPa E5=84 kPa numbers indicate replicate positions on a given hydrogel
	Experiment #1										Experiment #2												Experiment #3												Experiment #4												Experiment #5
	E1-1		E1-2		E3		E5-1		E5-2		E1-1		E1-2		E3-1		E3-2		E5-1		E5-2		E1-1		E1-2		E3-1		E3-2		E4-1		E4-2		E3-1		E3-2		E4-1		E4-2		E5-1		E5-2		E3-1		E3-2
time (min)	A(t)	S(t)	A(t)	S(t)	A(t)	S(t)	A(t)	S(t)	A(t)	S(t)	A(t)	S(t)	A(t)	S(t)	A(t)	S(t)	A(t)	S(t)	A(t)	S(t)	A(t)	S(t)	A(t)	S(t)	A(t)	S(t)	A(t)	S(t)	A(t)	S(t)	A(t)	S(t)	A(t)	S(t)	A(t)	S(t)	A(t)	S(t)	A(t)	S(t)	A(t)	S(t)	A(t)	S(t)	A(t)	S(t)	A(t)	S(t)	A(t)
0.00000	3.255708e-3	3.255708e-3	2.208853e-3	2.208853e-3	4.416943e-4	4.416943e-4	2.838359e-4	2.838359e-4	5.419206e-4	5.419206e-4	2.305845e-3	2.305845e-3	1.416491e-3	1.416491e-3	1.801971e-3	1.801971e-3	2.423205e-3	2.423205e-3	2.950648e-3	2.950648e-3	1.865826e-3	1.865826e-3	2.113785e-3	2.113785e-3	1.753164e-3	1.753164e-3	1.529100e-3	1.529100e-3	9.076092e-4	9.076092e-4	9.629488e-4	9.629488e-4	1.371236e-3	1.371236e-3	1.523681e-3	1.523681e-3	1.392680e-3	1.392680e-3	2.316952e-3	2.316952e-3	1.072865e-3	1.072865e-3	2.599638e-3	2.599638e-3	9.897133e-4	9.897133e-4	1.906202e-3	1.906202e-3	1.118122e-3
1.00000	3.291892e-3	3.337364e-3	2.226721e-3	2.317797e-3	4.485846e-4	4.662991e-4	2.884460e-4	3.222045e-4	5.558520e-4	6.950068e-4	2.327638e-3	2.419569e-3	1.432859e-3	1.517446e-3	1.814730e-3	1.897383e-3	2.445761e-3	2.568052e-3	2.948740e-3	3.152809e-3	1.879617e-3	1.994595e-3	2.122473e-3	2.239485e-3	1.760008e-3	1.860835e-3	1.530418e-3	1.606794e-3	9.071864e-4	1.004222e-3	9.202758e-4	1.079686e-3	1.357081e-3	1.547031e-3	1.507716e-3	1.641365e-3	1.391597e-3	1.523395e-3	2.320757e-3	2.508308e-3	1.082657e-3	1.239238e-3	2.594875e-3	2.845497e-3	9.927484e-4	1.162501e-3	1.934298e-3	2.016184e-3	1.172206e-3
2.00000	3.322623e-3	3.423571e-3	2.203925e-3	2.431171e-3	4.548175e-4	4.928487e-4	2.922778e-4	3.721523e-4	5.679955e-4	8.339894e-4	2.349875e-3	2.531713e-3	1.439543e-3	1.599479e-3	1.834506e-3	1.976732e-3	2.463997e-3	2.720517e-3	2.958580e-3	3.329989e-3	1.885763e-3	2.125277e-3	2.119246e-3	2.340069e-3	1.760590e-3	1.954560e-3	1.537640e-3	1.676291e-3	8.782315e-4	1.078203e-3	9.336472e-4	1.223544e-3	1.348840e-3	1.714999e-3	1.484408e-3	1.744580e-3	1.405945e-3	1.639332e-3	2.332453e-3	2.709916e-3	1.089460e-3	1.386640e-3	2.595766e-3	3.100733e-3	1.019571e-3	1.336731e-3	1.961499e-3	2.128290e-3	1.213109e-3
3.00000	3.364787e-3	3.496903e-3	2.108981e-3	2.532921e-3	4.607439e-4	5.221784e-4	2.968018e-4	4.159783e-4	5.770575e-4	9.676289e-4	2.366663e-3	2.643685e-3	1.453176e-3	1.673387e-3	1.851650e-3	2.045650e-3	2.484909e-3	2.866196e-3	2.955678e-3	3.490749e-3	1.898421e-3	2.248902e-3	2.074363e-3	2.419960e-3	1.760995e-3	2.032003e-3	1.528212e-3	1.743777e-3	8.633731e-4	1.150410e-3	9.376705e-4	1.390192e-3	1.352876e-3	1.869400e-3	1.452486e-3	1.856113e-3	1.403842e-3	1.740636e-3	2.332501e-3	2.921146e-3	1.066801e-3	1.517148e-3	2.603993e-3	3.359070e-3	1.048431e-3	1.519032e-3	1.980160e-3	2.240426e-3	1.248415e-3
4.00000	3.392774e-3	3.561429e-3	2.064686e-3	2.633002e-3	4.655653e-4	5.473879e-4	2.997617e-4	4.500651e-4	5.892354e-4	1.094499e-3	2.367726e-3	2.742517e-3	1.489659e-3	1.757721e-3	1.866998e-3	2.113004e-3	2.515105e-3	3.006573e-3	2.970682e-3	3.646771e-3	1.913554e-3	2.363634e-3	2.047853e-3	2.488613e-3	1.746569e-3	2.099163e-3	1.524950e-3	1.809384e-3	8.565850e-4	1.221203e-3	9.401242e-4	1.554550e-3	1.348794e-3	1.996068e-3	1.426538e-3	1.959507e-3	1.403747e-3	1.835006e-3	2.349498e-3	3.145774e-3	1.071028e-3	1.659584e-3	2.614058e-3	3.602031e-3	1.083760e-3	1.723557e-3	2.006079e-3	2.344812e-3	1.276736e-3
5.00000	3.426733e-3	3.626731e-3	2.025996e-3	2.719367e-3	4.682541e-4	5.712628e-4	3.032612e-4	4.937738e-4	5.972724e-4	1.209820e-3	2.377162e-3	2.839870e-3	1.523818e-3	1.847342e-3	1.887428e-3	2.181514e-3	2.544250e-3	3.137313e-3	2.946101e-3	3.783545e-3	1.930695e-3	2.475961e-3	2.020606e-3	2.545621e-3	1.736548e-3	2.172650e-3	1.522008e-3	1.883906e-3	8.488539e-4	1.288338e-3	9.470344e-4	1.716340e-3	1.361906e-3	2.136581e-3	1.410979e-3	2.067233e-3	1.412490e-3	1.937818e-3	2.378906e-3	3.397724e-3	1.069056e-3	1.810965e-3	2.576444e-3	3.848996e-3	1.106873e-3	1.919266e-3	2.026204e-3	2.443614e-3	1.304245e-3
6.00000	3.499268e-3	3.914355e-3	1.986026e-3	2.917562e-3	4.785061e-4	6.254196e-4	3.088247e-4	5.683633e-4	6.228652e-4	1.470487e-3	2.403972e-3	3.044658e-3	1.568492e-3	2.027304e-3	1.898229e-3	2.343852e-3	2.573002e-3	3.416831e-3	2.958886e-3	4.118597e-3	1.945951e-3	2.719918e-3	1.994716e-3	2.684020e-3	1.721195e-3	2.335302e-3	1.517736e-3	2.038021e-3	8.319824e-4	1.445402e-3	9.451151e-4	2.004218e-3	1.381830e-3	2.476475e-3	1.389692e-3	2.282818e-3	1.439132e-3	2.184205e-3	2.406606e-3	3.887143e-3	1.091642e-3	2.137259e-3	2.563184e-3	4.362778e-3	1.141366e-3	2.283720e-3	2.103073e-3	2.676626e-3	1.351963e-3
7.00000	3.479549e-3	4.156405e-3	1.944921e-3	3.106616e-3	4.874349e-4	6.752133e-4	3.143883e-4	6.406896e-4	6.409788e-4	1.704648e-3	2.421983e-3	3.225148e-3	1.644025e-3	2.230027e-3	1.906079e-3	2.481238e-3	2.614817e-3	3.683511e-3	2.939051e-3	4.392657e-3	1.979582e-3	2.947904e-3	1.968000e-3	2.804001e-3	1.685517e-3	2.492571e-3	1.515289e-3	2.179197e-3	8.334425e-4	1.586922e-3	9.465337e-4	2.304626e-3	1.397294e-3	2.802396e-3	1.369855e-3	2.493584e-3	1.459665e-3	2.431315e-3	2.456452e-3	4.395979e-3	1.103507e-3	2.460499e-3	2.535586e-3	4.840732e-3	1.182925e-3	2.649028e-3	2.149393e-3	2.882554e-3	1.407338e-3
8.00000	3.370295e-3	4.395136e-3	1.901440e-3	3.264118e-3	4.968047e-4	7.244825e-4	3.184745e-4	7.101869e-4	6.615408e-4	1.920853e-3	2.436229e-3	3.403089e-3	1.714079e-3	2.467732e-3	1.924831e-3	2.613974e-3	2.665908e-3	3.929326e-3	2.907001e-3	4.636512e-3	2.017120e-3	3.178458e-3	1.954491e-3	2.926936e-3	1.673873e-3	2.647031e-3	1.518248e-3	2.312949e-3	8.290329e-4	1.714653e-3	9.519696e-4	2.590287e-3	1.412941e-3	3.083737e-3	1.347708e-3	2.714638e-3	1.471919e-3	2.682376e-3	2.487161e-3	4.893694e-3	1.103081e-3	2.778396e-3	2.519150e-3	5.334754e-3	1.220860e-3	3.031876e-3	2.192697e-3	3.077363e-3	1.460328e-3
9.00000	3.253596e-3	4.615858e-3	1.854860e-3	3.408039e-3	5.083084e-4	7.739425e-4	3.241638e-4	7.765096e-4	6.787651e-4	2.121881e-3	2.436367e-3	3.589252e-3	1.770937e-3	2.737840e-3	1.957971e-3	2.740647e-3	2.709073e-3	4.181530e-3	2.875780e-3	4.860496e-3	2.063502e-3	3.411455e-3	1.938939e-3	3.046005e-3	1.677763e-3	2.794820e-3	1.524925e-3	2.439443e-3	8.071324e-4	1.830718e-3	9.672284e-4	2.874410e-3	1.421145e-3	3.358684e-3	1.322009e-3	2.949937e-3	1.481682e-3	2.934295e-3	2.549919e-3	5.416393e-3	1.090023e-3	3.101087e-3	2.520168e-3	5.846010e-3	1.263786e-3	3.425122e-3	2.234134e-3	3.261663e-3	1.518987e-3
10.00000	3.139411e-3	4.834971e-3	1.810915e-3	3.540496e-3	5.179763e-4	8.270383e-4	3.332793e-4	8.420150e-4	6.920549e-4	2.313066e-3	2.415469e-3	3.762511e-3	1.837474e-3	3.045663e-3	1.987611e-3	2.867370e-3	2.751801e-3	4.442797e-3	2.842478e-3	5.078582e-3	2.127656e-3	3.663427e-3	1.924039e-3	3.152954e-3	1.690617e-3	2.937714e-3	1.520086e-3	2.556550e-3	7.859545e-4	1.942330e-3	1.002109e-3	3.163254e-3	1.496503e-3	3.654438e-3	1.324848e-3	3.178070e-3	1.499873e-3	3.181184e-3	2.620083e-3	5.961663e-3	1.101961e-3	3.431202e-3	2.553776e-3	6.393573e-3	1.315439e-3	3.807579e-3	2.288252e-3	3.448355e-3	1.575010e-3
11.00000	3.027742e-3	5.050261e-3	1.771771e-3	3.661282e-3	5.252481e-4	8.851051e-4	3.392515e-4	8.965190e-4	6.959529e-4	2.494482e-3	2.374325e-3	3.924086e-3	1.879567e-3	3.357661e-3	2.026589e-3	2.993167e-3	2.772090e-3	4.692788e-3	2.843705e-3	5.277341e-3	2.206579e-3	3.934263e-3	1.911442e-3	3.211424e-3	1.669725e-3	3.071077e-3	1.519630e-3	2.670451e-3	7.635821e-4	2.029371e-3	1.041639e-3	3.445065e-3	1.570126e-3	3.983830e-3	1.324283e-3	3.398804e-3	1.511697e-3	3.429914e-3	2.681014e-3	6.519139e-3	1.099077e-3	3.767499e-3	2.608764e-3	6.999558e-3	1.369985e-3	4.183543e-3	2.339503e-3	3.645178e-3	1.601892e-3
12.00000	2.935691e-3	5.254988e-3	1.767640e-3	3.792861e-3	5.334973e-4	9.467721e-4	3.470782e-4	9.357783e-4	7.016903e-4	2.687835e-3	2.330119e-3	4.072820e-3	1.919813e-3	3.687688e-3	2.060554e-3	3.117290e-3	2.801054e-3	4.936491e-3	2.835998e-3	5.475877e-3	2.301709e-3	4.223210e-3	1.909661e-3	3.268026e-3	1.670163e-3	3.200111e-3	1.504340e-3	2.787129e-3	7.642458e-4	2.119170e-3	1.043260e-3	3.706670e-3	1.636838e-3	4.327743e-3	1.337913e-3	3.627257e-3	1.512715e-3	3.680766e-3	2.742614e-3	7.086068e-3	1.093041e-3	4.123936e-3	2.657718e-3	7.635533e-3	1.411472e-3	4.556479e-3	2.393316e-3	3.835960e-3	1.636033e-3
13.00000	2.820400e-3	5.456596e-3	1.821501e-3	3.929914e-3	5.443454e-4	1.006162e-3	3.527989e-4	9.772692e-4	7.106679e-4	2.886731e-3	2.289277e-3	4.204409e-3	1.957883e-3	4.055974e-3	2.102033e-3	3.241150e-3	2.825343e-3	5.170206e-3	2.839083e-3	5.661491e-3	2.391766e-3	4.539789e-3	1.946454e-3	3.330015e-3	1.677247e-3	3.332856e-3	1.506345e-3	2.911066e-3	7.623581e-4	2.198204e-3	1.054800e-3	3.943002e-3	1.695605e-3	4.687439e-3	1.369892e-3	3.855893e-3	1.529434e-3	3.935960e-3	2.819028e-3	7.672255e-3	1.116990e-3	4.496619e-3	2.705555e-3	8.302284e-3	1.449723e-3	4.927024e-3	2.456320e-3	4.019759e-3	1.665384e-3
14.00000	2.694747e-3	5.657902e-3	1.849800e-3	4.067019e-3	5.545855e-4	1.070726e-3	3.599026e-4	1.022092e-3	7.185979e-4	3.089854e-3	2.267412e-3	4.335973e-3	1.966524e-3	4.442088e-3	2.151937e-3	3.373836e-3	2.849495e-3	5.392058e-3	2.828540e-3	5.825523e-3	2.488023e-3	4.892778e-3	1.981988e-3	3.391916e-3	1.694455e-3	3.469258e-3	1.514778e-3	3.033883e-3	7.586121e-4	2.267976e-3	1.071823e-3	4.176760e-3	1.723703e-3	5.062996e-3	1.400729e-3	4.080634e-3	1.547048e-3	4.198023e-3	2.883844e-3	8.262487e-3	1.116625e-3	4.858946e-3	2.756888e-3	9.000288e-3	1.466237e-3	5.270777e-3	2.504152e-3	4.205805e-3	1.698290e-3
15.00000	2.553601e-3	5.863836e-3	1.883624e-3	4.211094e-3	5.672336e-4	1.134706e-3	3.675722e-4	1.051199e-3	7.275877e-4	3.302478e-3	2.246828e-3	4.458060e-3	1.966739e-3	4.822938e-3	2.202066e-3	3.506672e-3	2.863521e-3	5.610172e-3	2.856837e-3	5.986533e-3	2.597257e-3	5.257879e-3	2.037721e-3	3.458466e-3	1.716378e-3	3.599839e-3	1.527372e-3	3.152525e-3	7.558395e-4	2.331259e-3	1.085353e-3	4.409397e-3	1.717615e-3	5.420546e-3	1.433753e-3	4.291733e-3	1.562245e-3	4.453388e-3	2.936894e-3	8.831243e-3	1.111502e-3	5.214386e-3	2.845006e-3	9.700537e-3	1.486767e-3	5.617692e-3	2.550960e-3	4.390435e-3	1.733645e-3
16.00000	2.435192e-3	5.982246e-3	1.916880e-3	4.368958e-3	5.663157e-4	1.197410e-3	3.740158e-4	1.073924e-3	7.179401e-4	3.518684e-3	2.222930e-3	4.576194e-3	1.965297e-3	5.191427e-3	2.254145e-3	3.646195e-3	2.883847e-3	5.828648e-3	2.897969e-3	6.154926e-3	2.709409e-3	5.648683e-3	2.084463e-3	3.514634e-3	1.698474e-3	3.715942e-3	1.533814e-3	3.276544e-3	7.572848e-4	2.389306e-3	1.103759e-3	4.645228e-3	1.702835e-3	5.764763e-3	1.459612e-3	4.485834e-3	1.565790e-3	4.711649e-3	2.972585e-3	9.385235e-3	1.116503e-3	5.562268e-3	2.928929e-3	0.01044	1.491405e-3	5.955916e-3	2.578641e-3	4.575370e-3	1.773874e-3
17.00000	2.406822e-3	6.186570e-3	1.965525e-3	4.519386e-3	5.654812e-4	1.258314e-3	3.803338e-4	1.114347e-3	7.145415e-4	3.733793e-3	2.212964e-3	4.684726e-3	1.933730e-3	5.518177e-3	2.302774e-3	3.791232e-3	2.883097e-3	6.036474e-3	2.939981e-3	6.336179e-3	2.830491e-3	6.049482e-3	2.128120e-3	3.566936e-3	1.721169e-3	3.817645e-3	1.557910e-3	3.406895e-3	7.547187e-4	2.443681e-3	1.111257e-3	4.887283e-3	1.685910e-3	6.104292e-3	1.484303e-3	4.664486e-3	1.578265e-3	4.947683e-3	2.999384e-3	9.915864e-3	1.116029e-3	5.894926e-3	2.998919e-3	0.01122	1.497178e-3	6.289442e-3	2.609264e-3	4.757693e-3	1.831131e-3
18.00000	2.447063e-3	6.419968e-3	2.012053e-3	4.680399e-3	5.651236e-4	1.318097e-3	3.896378e-4	1.156498e-3	7.129336e-4	3.945759e-3	2.205785e-3	4.788351e-3	1.904542e-3	5.799418e-3	2.352391e-3	3.936506e-3	2.884160e-3	6.234399e-3	2.980530e-3	6.520851e-3	2.945700e-3	6.448690e-3	2.145496e-3	3.614806e-3	1.736368e-3	3.920481e-3	1.571320e-3	3.530113e-3	7.576535e-4	2.504265e-3	1.113904e-3	5.130148e-3	1.654007e-3	6.466835e-3	1.502640e-3	4.816161e-3	1.576879e-3	5.165797e-3	3.039728e-3	0.01047	1.139248e-3	6.234277e-3	3.049712e-3	0.01201	1.512886e-3	6.611750e-3	2.647711e-3	4.934767e-3	1.863766e-3
19.00000	2.493743e-3	6.670872e-3	2.042572e-3	4.862637e-3	5.639434e-4	1.375282e-3	3.985018e-4	1.198869e-3	7.137010e-4	4.154607e-3	2.215964e-3	4.876261e-3	1.894192e-3	6.042754e-3	2.402757e-3	4.071530e-3	2.894973e-3	6.446925e-3	3.007328e-3	6.705586e-3	3.058603e-3	6.850027e-3	2.154271e-3	3.668151e-3	1.730082e-3	4.015383e-3	1.577873e-3	3.658114e-3	7.828870e-4	2.576574e-3	1.118100e-3	5.365360e-3	1.622942e-3	6.816120e-3	1.520768e-3	4.951232e-3	1.583956e-3	5.379066e-3	3.074908e-3	0.01100	1.168709e-3	6.578947e-3	3.094801e-3	0.01281	1.516243e-3	6.929665e-3	2.700170e-3	5.120313e-3	1.897070e-3
20.00000	2.535090e-3	6.924995e-3	2.093696e-3	5.061865e-3	5.627751e-4	1.430273e-3	4.067686e-4	1.233224e-3	7.110333e-4	4.364807e-3	2.243025e-3	4.945431e-3	1.882856e-3	6.241846e-3	2.466112e-3	4.243069e-3	2.894048e-3	6.666264e-3	3.033878e-3	6.879914e-3	3.143700e-3	7.231148e-3	2.165000e-3	3.733441e-3	1.718181e-3	4.104257e-3	1.592375e-3	3.784788e-3	8.085629e-4	2.657539e-3	1.137042e-3	5.601680e-3	1.538527e-3	7.129256e-3	1.535394e-3	5.083206e-3	1.596259e-3	5.592494e-3	3.105044e-3	0.01152	1.170145e-3	6.901054e-3	3.125282e-3	0.01360	1.512325e-3	7.250118e-3	2.747258e-3	5.292542e-3	1.914999e-3
21.00000	2.583681e-3	7.180928e-3	2.144406e-3	5.294555e-3	5.656004e-4	1.480699e-3	4.143438e-4	1.271824e-3	7.113622e-4	4.584253e-3	2.291599e-3	5.018343e-3	1.890068e-3	6.423642e-3	2.515054e-3	4.423158e-3	2.914449e-3	6.911992e-3	3.054580e-3	7.058404e-3	3.221395e-3	7.641717e-3	2.175165e-3	3.803683e-3	1.739871e-3	4.184218e-3	1.596909e-3	3.911669e-3	8.268355e-4	2.746719e-3	1.161909e-3	5.864048e-3	1.459501e-3	7.415254e-3	1.553780e-3	5.208874e-3	1.610144e-3	5.798084e-3	3.141941e-3	0.01200	1.206008e-3	7.219304e-3	3.144061e-3	0.01437	1.500962e-3	7.582204e-3	2.791673e-3	5.452895e-3	1.935814e-3
22.00000	2.625633e-3	7.437767e-3	2.171569e-3	5.509636e-3	5.678535e-4	1.532590e-3	4.215104e-4	1.311994e-3	7.084265e-4	4.791907e-3	2.344001e-3	5.090488e-3	1.882413e-3	6.586182e-3	2.573058e-3	4.610986e-3	2.910824e-3	7.156871e-3	3.057108e-3	7.237539e-3	3.299090e-3	8.045334e-3	2.186199e-3	3.872405e-3	1.746698e-3	4.264050e-3	1.611439e-3	4.030795e-3	8.403149e-4	2.836518e-3	1.175547e-3	6.120741e-3	1.390704e-3	7.666533e-3	1.568111e-3	5.324932e-3	1.631904e-3	6.011206e-3	3.181616e-3	0.01249	1.239109e-3	7.539964e-3	3.162460e-3	0.01511	1.490014e-3	7.911274e-3	2.843692e-3	5.614372e-3	1.928074e-3
23.00000	2.706115e-3	7.693198e-3	2.219491e-3	5.723839e-3	5.692005e-4	1.583862e-3	4.314745e-4	1.351474e-3	7.077322e-4	4.998636e-3	2.391207e-3	5.163701e-3	1.875392e-3	6.714309e-3	2.623437e-3	4.834604e-3	2.897560e-3	7.427563e-3	3.079296e-3	7.439097e-3	3.372814e-3	8.432981e-3	2.197406e-3	3.936435e-3	1.733792e-3	4.342105e-3	1.614148e-3	4.148538e-3	8.570979e-4	2.935815e-3	1.185858e-3	6.378412e-3	1.319653e-3	7.912181e-3	1.577242e-3	5.429301e-3	1.648132e-3	6.230509e-3	3.218659e-3	0.01295	1.270980e-3	7.854916e-3	3.172690e-3	0.01585	1.480567e-3	8.232496e-3	2.897261e-3	5.778204e-3	1.934601e-3
24.00000	2.704103e-3	7.962411e-3	2.264418e-3	5.920536e-3	5.719662e-4	1.629722e-3	4.430103e-4	1.394662e-3	7.040169e-4	5.195436e-3	2.435212e-3	5.233273e-3	1.874519e-3	6.808111e-3	2.670054e-3	5.053097e-3	2.894623e-3	7.736195e-3	3.096864e-3	7.646554e-3	3.448517e-3	8.809731e-3	2.208657e-3	3.998163e-3	1.723823e-3	4.410422e-3	1.606545e-3	4.263890e-3	8.672297e-4	3.041144e-3	1.182711e-3	6.628776e-3	1.274752e-3	8.152820e-3	1.586816e-3	5.538746e-3	1.662716e-3	6.455357e-3	3.253534e-3	0.01339	1.316955e-3	8.176013e-3	3.193149e-3	0.01658	1.483288e-3	8.554548e-3	2.965025e-3	5.949237e-3	1.935249e-3
25.00000	2.717886e-3	8.224280e-3	2.265141e-3	6.107422e-3	5.743265e-4	1.674056e-3	4.544832e-4	1.447752e-3	7.076469e-4	5.386366e-3	2.496300e-3	5.320555e-3	1.883274e-3	6.893221e-3	2.713182e-3	5.278615e-3	2.899786e-3	8.059691e-3	3.108671e-3	7.864726e-3	3.512221e-3	9.214788e-3	2.203879e-3	4.059805e-3	1.712102e-3	4.467327e-3	1.585573e-3	4.374983e-3	8.739842e-4	3.151266e-3	1.186657e-3	6.872344e-3	1.246244e-3	8.385941e-3	1.597915e-3	5.663456e-3	1.674406e-3	6.683259e-3	3.260453e-3	0.01381	1.370354e-3	8.511422e-3	3.197712e-3	0.01731	1.491124e-3	8.866666e-3	3.050474e-3	6.126153e-3	1.927990e-3
26.00000	2.712151e-3	8.454761e-3	2.273042e-3	6.281965e-3	5.898833e-4	1.718366e-3	4.665218e-4	1.502067e-3	7.281846e-4	5.581778e-3	2.560952e-3	5.415921e-3	1.897305e-3	6.978040e-3	2.773612e-3	5.507409e-3	2.887272e-3	8.382186e-3	3.106367e-3	8.068169e-3	3.580284e-3	9.645109e-3	2.199578e-3	4.132740e-3	1.738223e-3	4.528225e-3	1.569426e-3	4.485427e-3	8.641179e-4	3.257951e-3	1.177514e-3	7.123828e-3	1.226106e-3	8.628042e-3	1.608890e-3	5.796524e-3	1.695969e-3	6.902183e-3	3.289127e-3	0.01421	1.401677e-3	8.840381e-3	3.211904e-3	0.01804	1.519453e-3	9.183421e-3	3.136009e-3	6.296661e-3	1.944286e-3
27.00000	2.702393e-3	8.610595e-3	2.285642e-3	6.441946e-3	6.043434e-4	1.761377e-3	4.803521e-4	1.538466e-3	7.496845e-4	5.776690e-3	2.626307e-3	5.519734e-3	1.922356e-3	7.080129e-3	2.847456e-3	5.739052e-3	2.899936e-3	8.718608e-3	3.128568e-3	8.272156e-3	3.616845e-3	0.01006	2.203618e-3	4.208803e-3	1.751438e-3	4.590772e-3	1.561698e-3	4.611590e-3	8.531013e-4	3.359977e-3	1.183426e-3	7.367969e-3	1.216259e-3	8.863766e-3	1.622532e-3	5.948137e-3	1.712614e-3	7.131422e-3	3.328765e-3	0.01462	1.436652e-3	9.177870e-3	3.225593e-3	0.01874	1.546268e-3	9.512589e-3	3.226609e-3	6.467804e-3	1.927320e-3
28.00000	2.710944e-3	8.723471e-3	2.289412e-3	6.588862e-3	6.194830e-4	1.804197e-3	4.972943e-4	1.577819e-3	7.614638e-4	5.977231e-3	2.682663e-3	5.624626e-3	1.949520e-3	7.193642e-3	2.923399e-3	5.970571e-3	2.897135e-3	9.063530e-3	3.158401e-3	8.481929e-3	3.650689e-3	0.01048	2.215217e-3	4.289819e-3	1.782248e-3	4.661253e-3	1.560247e-3	4.740918e-3	8.479838e-4	3.459598e-3	1.184392e-3	7.618415e-3	1.199348e-3	9.083584e-3	1.650148e-3	6.133525e-3	1.746027e-3	7.370351e-3	3.380438e-3	0.01501	1.453579e-3	9.522296e-3	3.241342e-3	0.01944	1.586082e-3	9.863275e-3	3.322189e-3	6.660074e-3	1.947613e-3
29.00000	2.703600e-3	8.816428e-3	2.300514e-3	6.721371e-3	6.335258e-4	1.849520e-3	5.135449e-4	1.617362e-3	7.768609e-4	6.178295e-3	2.727698e-3	5.734112e-3	1.955593e-3	7.310774e-3	2.995930e-3	6.221054e-3	2.900173e-3	9.377463e-3	3.176266e-3	8.687291e-3	3.691509e-3	0.01090	2.225990e-3	4.374179e-3	1.806308e-3	4.721662e-3	1.570256e-3	4.876108e-3	8.319234e-4	3.550002e-3	1.188123e-3	7.868290e-3	1.172179e-3	9.299155e-3	1.663901e-3	6.332763e-3	1.781353e-3	7.616161e-3	3.416641e-3	0.01545	1.469557e-3	9.865518e-3	3.267640e-3	0.02012	1.615949e-3	0.01023	3.407834e-3	6.853187e-3	1.937467e-3
30.00000	2.711648e-3	8.918037e-3	2.309655e-3	6.895553e-3	6.494164e-4	1.900589e-3	5.284125e-4	1.656369e-3	8.004561e-4	6.371417e-3	2.775657e-3	5.850024e-3	1.944940e-3	7.425174e-3	3.068461e-3	6.455360e-3	2.911299e-3	9.672307e-3	3.182981e-3	8.898873e-3	3.743928e-3	0.01134	2.207702e-3	4.447028e-3	1.839513e-3	4.776712e-3	1.577928e-3	5.020684e-3	8.215410e-4	3.638135e-3	1.172495e-3	8.114398e-3	1.159942e-3	9.511926e-3	1.678134e-3	6.535713e-3	1.820015e-3	7.885473e-3	3.459239e-3	0.01587	1.483966e-3	0.01022	3.284997e-3	0.02077	1.650039e-3	0.01060	3.490976e-3	7.053427e-3	1.947968e-3
31.00000	2.694646e-3	9.037251e-3	2.264315e-3	7.041488e-3	6.666064e-4	1.952922e-3	5.443174e-4	1.697043e-3	8.259028e-4	6.567487e-3	2.829477e-3	5.965635e-3	1.936172e-3	7.543002e-3	3.137629e-3	6.681829e-3	2.922550e-3	9.949424e-3	3.157868e-3	9.103579e-3	3.781266e-3	0.01174	2.193714e-3	4.515315e-3	1.894100e-3	4.862134e-3	1.608453e-3	5.180371e-3	8.218359e-4	3.731562e-3	1.162541e-3	8.347702e-3	1.152088e-3	9.724392e-3	1.705344e-3	6.738430e-3	1.859070e-3	8.163948e-3	3.497232e-3	0.01631	1.489174e-3	0.01057	3.289940e-3	0.02139	1.689438e-3	0.01096	3.578342e-3	7.274026e-3	1.960834e-3
32.00000	2.688510e-3	9.159685e-3	2.232349e-3	7.170949e-3	6.858349e-4	2.000880e-3	5.592164e-4	1.736962e-3	8.498146e-4	6.759232e-3	2.882670e-3	6.085890e-3	1.947824e-3	7.666890e-3	3.188446e-3	6.916210e-3	2.954152e-3	0.01022	3.159033e-3	9.300653e-3	3.808020e-3	0.01216	2.180335e-3	4.586730e-3	1.950078e-3	4.958170e-3	1.632728e-3	5.357878e-3	8.229125e-4	3.833396e-3	1.193798e-3	8.597648e-3	1.142408e-3	9.937208e-3	1.727049e-3	6.955194e-3	1.892642e-3	8.451426e-3	3.536541e-3	0.01674	1.515204e-3	0.01090	3.310080e-3	0.02200	1.729740e-3	0.01134	3.673190e-3	7.512554e-3	1.997213e-3
33.00000	2.563762e-3	9.286243e-3	2.198732e-3	7.287708e-3	6.912589e-4	2.044570e-3	5.749012e-4	1.782540e-3	8.700842e-4	6.941635e-3	2.931859e-3	6.206221e-3	1.958768e-3	7.791436e-3	3.251801e-3	7.141216e-3	3.005642e-3	0.01048	3.149630e-3	9.482017e-3	3.830290e-3	0.01260	2.176164e-3	4.654540e-3	2.019838e-3	5.077493e-3	1.671105e-3	5.547066e-3	8.206414e-4	3.928991e-3	1.198995e-3	8.837485e-3	1.137156e-3	0.01013	1.771479e-3	7.188305e-3	1.934175e-3	8.748999e-3	3.569735e-3	0.01716	1.535685e-3	0.01123	3.322543e-3	0.02258	1.751234e-3	0.01172	3.770051e-3	7.765876e-3	2.019807e-3
34.00000	2.537203e-3	9.403144e-3	2.095400e-3	7.404827e-3	6.966233e-4	2.093947e-3	5.934150e-4	1.864453e-3	8.934723e-4	7.134196e-3	2.982516e-3	6.338400e-3	1.960856e-3	7.915109e-3	3.293279e-3	7.369009e-3	3.034269e-3	0.01069	3.147053e-3	9.677382e-3	3.852535e-3	0.01303	2.167216e-3	4.727258e-3	2.087846e-3	5.204647e-3	1.707892e-3	5.750632e-3	8.255966e-4	4.026120e-3	1.191294e-3	9.070528e-3	1.147537e-3	0.01032	1.812233e-3	7.425017e-3	1.966066e-3	9.040574e-3	3.612211e-3	0.01759	1.541027e-3	0.01157	3.327719e-3	0.02314	1.777280e-3	0.01210	3.869768e-3	8.028693e-3	2.040183e-3
35.00000	2.504406e-3	9.509883e-3	2.063951e-3	7.531500e-3	6.896257e-4	2.145517e-3	6.107343e-4	1.954633e-3	9.033270e-4	7.321106e-3	3.015451e-3	6.456082e-3	1.955188e-3	8.036935e-3	3.333858e-3	7.593503e-3	3.062846e-3	0.01091	3.143212e-3	9.869649e-3	3.870233e-3	0.01347	2.168780e-3	4.797674e-3	2.168914e-3	5.340947e-3	1.765250e-3	5.950216e-3	8.353892e-4	4.128632e-3	1.175010e-3	9.299505e-3	1.163960e-3	0.01051	1.844409e-3	7.644608e-3	1.985753e-3	9.324801e-3	3.694289e-3	0.01802	1.556409e-3	0.01190	3.378892e-3	0.02371	1.802936e-3	0.01250	3.961333e-3	8.306888e-3	2.061019e-3
36.00000	2.465272e-3	9.630104e-3	2.022071e-3	7.657709e-3	6.816506e-4	2.196205e-3	6.288395e-4	2.063389e-3	9.153377e-4	7.506834e-3	3.037617e-3	6.570651e-3	1.972053e-3	8.183344e-3	3.361697e-3	7.816233e-3	3.109599e-3	0.01115	3.138083e-3	0.01007	3.900131e-3	0.01390	2.181290e-3	4.858273e-3	2.252585e-3	5.480956e-3	1.816345e-3	6.156643e-3	8.543401e-4	4.233106e-3	1.165307e-3	9.505641e-3	1.172895e-3	0.01067	1.886381e-3	7.868698e-3	2.006483e-3	9.590041e-3	3.768802e-3	0.01847	1.582305e-3	0.01224	3.416953e-3	0.02425	1.840065e-3	0.01290	4.080652e-3	8.626021e-3	2.096039e-3
37.00000	2.444850e-3	9.736541e-3	1.957159e-3	7.778547e-3	6.861448e-4	2.258420e-3	6.477619e-4	2.188428e-3	9.206000e-4	7.696983e-3	3.053369e-3	6.680538e-3	1.973482e-3	8.316000e-3	3.364348e-3	8.036751e-3	3.135938e-3	0.01140	3.130092e-3	0.01026	3.924280e-3	0.01435	2.186373e-3	4.917004e-3	2.317656e-3	5.620063e-3	1.858648e-3	6.354347e-3	8.771549e-4	4.344879e-3	1.148367e-3	9.698141e-3	1.174447e-3	0.01083	1.926349e-3	8.087601e-3	2.032683e-3	9.851147e-3	3.820767e-3	0.01891	1.617304e-3	0.01259	3.485459e-3	0.02479	1.868418e-3	0.01331	4.207160e-3	8.990874e-3	2.150388e-3
38.00000	2.409940e-3	9.837345e-3	1.901491e-3	7.905685e-3	6.879449e-4	2.321970e-3	6.636353e-4	2.320445e-3	9.334025e-4	7.884965e-3	3.070351e-3	6.792372e-3	1.980833e-3	8.447087e-3	3.366273e-3	8.264932e-3	3.196155e-3	0.01166	3.112066e-3	0.01044	3.959326e-3	0.01482	2.221472e-3	4.980383e-3	2.374613e-3	5.754585e-3	1.900703e-3	6.551803e-3	8.963123e-4	4.456122e-3	1.147103e-3	9.888661e-3	1.187796e-3	0.01099	1.960479e-3	8.281689e-3	2.057939e-3	0.01013	3.879371e-3	0.01937	1.653045e-3	0.01292	3.554368e-3	0.02532	1.879305e-3	0.01369	4.323489e-3	9.355667e-3	2.189759e-3
39.00000	2.375434e-3	9.949518e-3	1.858888e-3	8.018983e-3	6.898522e-4	2.384782e-3	6.804832e-4	2.465915e-3	9.406747e-4	8.074128e-3	3.084421e-3	6.899310e-3	2.006808e-3	8.591649e-3	3.374061e-3	8.495638e-3	3.223356e-3	0.01192	3.131628e-3	0.01064	3.985103e-3	0.01530	2.263305e-3	5.035595e-3	2.474461e-3	5.897865e-3	1.939273e-3	6.742816e-3	9.154845e-4	4.576538e-3	1.141083e-3	0.01008	1.204143e-3	0.01115	2.018625e-3	8.465811e-3	2.080496e-3	0.01040	3.933091e-3	0.01980	1.681825e-3	0.01324	3.607051e-3	0.02582	1.906328e-3	0.01405	4.455819e-3	9.736778e-3	2.249151e-3
40.00000	2.334287e-3	0.01006	1.786231e-3	8.067938e-3	6.923676e-4	2.440464e-3	6.997827e-4	2.632947e-3	9.448286e-4	8.279456e-3	3.097763e-3	6.998328e-3	2.052266e-3	8.749938e-3	3.381011e-3	8.722844e-3	3.255896e-3	0.01219	3.171856e-3	0.01084	4.021402e-3	0.01578	2.302053e-3	5.091111e-3	2.562588e-3	6.052146e-3	1.980442e-3	6.929446e-3	9.149683e-4	4.694771e-3	1.116550e-3	0.01027	1.214524e-3	0.01131	2.078479e-3	8.664521e-3	2.078717e-3	0.01066	3.981938e-3	0.02025	1.717421e-3	0.01355	3.669128e-3	0.02634	1.950475e-3	0.01442	4.594264e-3	0.01014	2.309713e-3
41.00000	2.294247e-3	0.01014	1.776058e-3	8.116170e-3	6.900549e-4	2.504599e-3	7.181393e-4	2.799257e-3	9.547441e-4	8.480508e-3	3.112474e-3	7.099505e-3	2.092032e-3	8.900168e-3	3.374911e-3	8.954988e-3	3.301899e-3	0.01246	3.243056e-3	0.01105	4.065504e-3	0.01625	2.349924e-3	5.149146e-3	2.601564e-3	6.173736e-3	2.010193e-3	7.099723e-3	9.177999e-4	4.810084e-3	1.085365e-3	0.01045	1.230125e-3	0.01149	2.116849e-3	8.863108e-3	2.095595e-3	0.01091	4.010198e-3	0.02073	1.751604e-3	0.01386	3.720989e-3	0.02687	1.997710e-3	0.01481	4.744950e-3	0.01057	2.377703e-3
42.00000	2.249278e-3	0.01021	1.772494e-3	8.173490e-3	6.849885e-4	2.577245e-3	7.398907e-4	2.976065e-3	9.676685e-4	8.708370e-3	3.128728e-3	7.194820e-3	2.131506e-3	9.043553e-3	3.372761e-3	9.194157e-3	3.325738e-3	0.01273	3.308421e-3	0.01127	4.105209e-3	0.01670	2.399141e-3	5.210310e-3	2.637577e-3	6.301637e-3	2.050049e-3	7.264373e-3	9.253213e-4	4.918318e-3	1.031065e-3	0.01062	1.251586e-3	0.01168	2.153007e-3	9.056988e-3	2.116460e-3	0.01115	4.036132e-3	0.02122	1.768191e-3	0.01418	3.779006e-3	0.02743	2.046898e-3	0.01520	4.909478e-3	0.01100	2.455692e-3
43.00000	2.282980e-3	0.01028	1.757364e-3	8.237627e-3	6.936550e-4	2.663529e-3	7.612962e-4	3.158939e-3	9.809948e-4	8.950071e-3	3.158613e-3	7.299612e-3	2.171334e-3	9.190493e-3	3.344158e-3	9.423713e-3	3.347539e-3	0.01302	3.374654e-3	0.01151	4.177931e-3	0.01717	2.433980e-3	5.288979e-3	2.682220e-3	6.407204e-3	2.088398e-3	7.421239e-3	9.334473e-4	5.031227e-3	1.002109e-3	0.01079	1.279683e-3	0.01188	2.162041e-3	9.241244e-3	2.125316e-3	0.01138	4.051566e-3	0.02173	1.787868e-3	0.01450	3.870191e-3	0.02802	2.118190e-3	0.01560	5.060433e-3	0.01146	2.518974e-3
44.00000	2.334790e-3	0.01034	1.826407e-3	8.309562e-3	7.055998e-4	2.766991e-3	7.769496e-4	3.303529e-3	9.943820e-4	9.187509e-3	3.176649e-3	7.397563e-3	2.229786e-3	9.350503e-3	3.334570e-3	9.655220e-3	3.356002e-3	0.01332	3.441704e-3	0.01176	4.238667e-3	0.01764	2.482763e-3	5.363609e-3	2.729955e-3	6.525935e-3	2.134516e-3	7.574235e-3	9.380486e-4	5.136910e-3	9.962916e-4	0.01096	1.323793e-3	0.01213	2.181496e-3	9.428475e-3	2.151798e-3	0.01163	4.092190e-3	0.02227	1.826883e-3	0.01482	3.965277e-3	0.02865	2.179705e-3	0.01603	5.188223e-3	0.01193	2.582759e-3
45.00000	2.387204e-3	0.01041	1.877066e-3	8.383975e-3	7.109523e-4	2.868593e-3	7.975065e-4	3.443844e-3	1.017746e-3	9.445277e-3	3.197710e-3	7.495727e-3	2.285683e-3	9.519571e-3	3.326169e-3	9.891639e-3	3.370328e-3	0.01361	3.519235e-3	0.01202	4.330916e-3	0.01812	2.527550e-3	5.438630e-3	2.733973e-3	6.652394e-3	2.174704e-3	7.736852e-3	9.441837e-4	5.246397e-3	9.934425e-4	0.01114	1.368329e-3	0.01240	2.212517e-3	9.621126e-3	2.201083e-3	0.01190	4.113215e-3	0.02285	1.877835e-3	0.01514	4.043791e-3	0.02929	2.252071e-3	0.01648	5.320992e-3	0.01240	2.651773e-3
46.00000	2.452596e-3	0.01046	1.924781e-3	8.482969e-3	7.177353e-4	2.973068e-3	8.210181e-4	3.585510e-3	1.033959e-3	9.700304e-3	3.235666e-3	7.593741e-3	2.321678e-3	9.668245e-3	3.322032e-3	0.01013	3.384279e-3	0.01388	3.591092e-3	0.01229	4.421474e-3	0.01862	2.566776e-3	5.513868e-3	2.739641e-3	6.774988e-3	2.225951e-3	7.895986e-3	9.556575e-4	5.373096e-3	9.981275e-4	0.01133	1.434174e-3	0.01271	2.254673e-3	9.831623e-3	2.242137e-3	0.01219	4.145861e-3	0.02344	1.912214e-3	0.01546	4.108653e-3	0.02996	2.306031e-3	0.01693	5.419965e-3	0.01285	2.685266e-3
47.00000	2.499678e-3	0.01051	1.938259e-3	8.582480e-3	7.137418e-4	3.066719e-3	8.384946e-4	3.721047e-3	1.057408e-3	9.977075e-3	3.259175e-3	7.690161e-3	2.365504e-3	9.813692e-3	3.334320e-3	0.01038	3.410893e-3	0.01414	3.662961e-3	0.01257	4.528791e-3	0.01915	2.604482e-3	5.596708e-3	2.780883e-3	6.900674e-3	2.254955e-3	8.053820e-3	9.591085e-4	5.502139e-3	1.006758e-3	0.01151	1.487157e-3	0.01304	2.284428e-3	0.01006	2.281670e-3	0.01249	4.235576e-3	0.02407	1.946068e-3	0.01577	4.173343e-3	0.03067	2.360407e-3	0.01739	5.537881e-3	0.01329	2.703696e-3
48.00000	2.560543e-3	0.01063	1.987575e-3	8.688135e-3	7.094741e-4	3.161311e-3	8.543680e-4	3.870635e-3	1.068006e-3	0.01026	3.295298e-3	7.794501e-3	2.388784e-3	9.952788e-3	3.332382e-3	0.01061	3.401480e-3	0.01440	3.741001e-3	0.01287	4.660934e-3	0.01971	2.639538e-3	5.677375e-3	2.813908e-3	7.021698e-3	2.288093e-3	8.218083e-3	9.661874e-4	5.637332e-3	1.002383e-3	0.01169	1.543596e-3	0.01339	2.317907e-3	0.01031	2.320799e-3	0.01279	4.286884e-3	0.02473	1.990182e-3	0.01608	4.242413e-3	0.03144	2.430161e-3	0.01789	5.661777e-3	0.01375	2.724156e-3
49.00000	2.611247e-3	0.01074	2.015203e-3	8.824930e-3	7.054687e-4	3.264761e-3	8.760879e-4	4.054075e-3	1.077373e-3	0.01056	3.355808e-3	7.902657e-3	2.416669e-3	0.01008	3.314281e-3	0.01083	3.423482e-3	0.01467	3.840300e-3	0.01319	4.770455e-3	0.02027	2.645098e-3	5.761909e-3	2.802033e-3	7.139759e-3	2.311221e-3	8.389410e-3	9.755818e-4	5.766626e-3	1.002824e-3	0.01186	1.606457e-3	0.01374	2.323265e-3	0.01057	2.357621e-3	0.01308	4.367585e-3	0.02544	2.042607e-3	0.01641	4.326128e-3	0.03225	2.501147e-3	0.01841	5.802724e-3	0.01422	2.722670e-3
50.00000	2.664767e-3	0.01084	2.029456e-3	8.985737e-3	6.954670e-4	3.370607e-3	8.924957e-4	4.255809e-3	1.093708e-3	0.01087	3.414436e-3	8.014025e-3	2.433332e-3	0.01019	3.304280e-3	0.01105	3.440608e-3	0.01493	3.924310e-3	0.01352	4.892853e-3	0.02087	2.670206e-3	5.845922e-3	2.769523e-3	7.248726e-3	2.334653e-3	8.572377e-3	1.004222e-3	5.900728e-3	1.032960e-3	0.01204	1.664692e-3	0.01411	2.345806e-3	0.01083	2.412634e-3	0.01338	4.451002e-3	0.02619	2.087889e-3	0.01673	4.400570e-3	0.03308	2.552251e-3	0.01891	5.944403e-3	0.01469	2.731164e-3
51.00000	2.764465e-3	0.01097	2.086879e-3	9.165031e-3	6.922364e-4	3.463995e-3	9.125496e-4	4.499317e-3	1.091771e-3	0.01117	3.478611e-3	8.134870e-3	2.446490e-3	0.01032	3.325957e-3	0.01126	3.437783e-3	0.01518	4.013264e-3	0.01385	5.000747e-3	0.02154	2.695054e-3	5.924114e-3	2.767308e-3	7.362845e-3	2.350538e-3	8.770206e-3	1.027863e-3	6.026261e-3	1.066577e-3	0.01222	1.715849e-3	0.01448	2.381140e-3	0.01111	2.461036e-3	0.01367	4.561511e-3	0.02696	2.114819e-3	0.01705	4.477097e-3	0.03392	2.594726e-3	0.01942	6.061159e-3	0.01515	2.723654e-3
52.00000	2.846355e-3	0.01112	2.095090e-3	9.342054e-3	6.853819e-4	3.545523e-3	9.364069e-4	4.756404e-3	1.092417e-3	0.01147	3.541644e-3	8.263937e-3	2.465847e-3	0.01046	3.319356e-3	0.01147	3.456559e-3	0.01541	4.104808e-3	0.01422	5.111057e-3	0.02225	2.712994e-3	5.998092e-3	2.782918e-3	7.465579e-3	2.382555e-3	8.967454e-3	1.047315e-3	6.150084e-3	1.103079e-3	0.01242	1.764160e-3	0.01486	2.415418e-3	0.01138	2.508027e-3	0.01396	4.678122e-3	0.02777	2.149356e-3	0.01737	4.531643e-3	0.03478	2.650713e-3	0.01992	6.160791e-3	0.01561	2.716374e-3
53.00000	2.933679e-3	0.01128	2.103869e-3	9.512363e-3	6.713867e-4	3.615749e-3	9.599185e-4	5.007770e-3	1.093745e-3	0.01176	3.593720e-3	8.385133e-3	2.506308e-3	0.01062	3.346909e-3	0.01165	3.465972e-3	0.01562	4.200489e-3	0.01461	5.227368e-3	0.02298	2.738407e-3	6.058865e-3	2.765633e-3	7.562181e-3	2.407605e-3	9.164550e-3	1.063818e-3	6.275366e-3	1.130188e-3	0.01262	1.812303e-3	0.01525	2.458287e-3	0.01166	2.551767e-3	0.01426	4.818328e-3	0.02859	2.188261e-3	0.01769	4.563694e-3	0.03562	2.710507e-3	0.02041	6.274716e-3	0.01608	2.727168e-3
54.00000	3.022712e-3	0.01149	2.115126e-3	9.685305e-3	6.563425e-4	3.666615e-3	9.876105e-4	5.299181e-3	1.083074e-3	0.01206	3.656879e-3	8.508024e-3	2.527602e-3	0.01077	3.373598e-3	0.01184	3.487773e-3	0.01583	4.300123e-3	0.01502	5.351193e-3	0.02375	2.763645e-3	6.117856e-3	2.773619e-3	7.643172e-3	2.417946e-3	9.374226e-3	1.085984e-3	6.409188e-3	1.150131e-3	0.01283	1.835423e-3	0.01562	2.499029e-3	0.01194	2.587842e-3	0.01455	4.953017e-3	0.02943	2.219122e-3	0.01800	4.596812e-3	0.03644	2.778467e-3	0.02091	6.426086e-3	0.01655	2.779238e-3
55.00000	3.125025e-3	0.01172	2.122769e-3	9.847713e-3	6.608486e-4	3.720546e-3	1.015680e-3	5.592070e-3	1.080479e-3	0.01236	3.721581e-3	8.628881e-3	2.565026e-3	0.01094	3.383574e-3	0.01201	3.517575e-3	0.01603	4.396052e-3	0.01543	5.447927e-3	0.02452	2.790057e-3	6.179150e-3	2.814604e-3	7.711283e-3	2.422868e-3	9.592058e-3	1.099773e-3	6.542390e-3	1.169789e-3	0.01304	1.853688e-3	0.01598	2.509255e-3	0.01223	2.607381e-3	0.01482	5.084587e-3	0.03029	2.225827e-3	0.01829	4.649175e-3	0.03728	2.840385e-3	0.02140	6.570328e-3	0.01704	2.828797e-3
56.00000	3.203898e-3	0.01198	2.117708e-3	9.983010e-3	6.610513e-4	3.767991e-3	1.010871e-3	5.876911e-3	1.078177e-3	0.01267	3.771737e-3	8.752174e-3	2.601489e-3	0.01111	3.410289e-3	0.01219	3.551202e-3	0.01622	4.511679e-3	0.01586	5.547303e-3	0.02528	2.817033e-3	6.238184e-3	2.837093e-3	7.779755e-3	2.426503e-3	9.805246e-3	1.114477e-3	6.672539e-3	1.203251e-3	0.01326	1.883551e-3	0.01631	2.508665e-3	0.01254	2.626381e-3	0.01509	5.218179e-3	0.03115	2.261422e-3	0.01858	4.713191e-3	0.03815	2.884324e-3	0.02192	6.742729e-3	0.01755	2.884025e-3
57.00000	3.319490e-3	0.01228	2.184995e-3	0.01012	6.624818e-4	3.826022e-3	1.009268e-3	6.184950e-3	1.072866e-3	0.01298	3.827452e-3	8.880223e-3	2.631715e-3	0.01130	3.458955e-3	0.01236	3.575604e-3	0.01639	4.619143e-3	0.01632	5.651175e-3	0.02605	2.785105e-3	6.289139e-3	2.838484e-3	7.842276e-3	2.448844e-3	0.01003	1.131274e-3	6.800093e-3	1.230526e-3	0.01351	1.919274e-3	0.01666	2.523020e-3	0.01285	2.657022e-3	0.01536	5.294604e-3	0.03202	2.297394e-3	0.01886	4.776422e-3	0.03899	2.946914e-3	0.02246	6.922025e-3	0.01807	2.954566e-3
58.00000	3.406814e-3	0.01253	2.194446e-3	0.01024	6.627798e-4	3.878725e-3	1.010022e-3	6.488463e-3	1.085973e-3	0.01330	3.886507e-3	9.001834e-3	2.688206e-3	0.01149	3.498933e-3	0.01253	3.635658e-3	0.01656	4.736666e-3	0.01679	5.748948e-3	0.02680	2.755218e-3	6.333231e-3	2.841395e-3	7.904539e-3	2.474516e-3	0.01026	1.139636e-3	6.931820e-3	1.265836e-3	0.01379	1.949731e-3	0.01699	2.535261e-3	0.01315	2.695022e-3	0.01562	5.429402e-3	0.03287	2.328256e-3	0.01913	4.839407e-3	0.03982	2.997395e-3	0.02299	7.087480e-3	0.01859	3.025108e-3
59.00000	3.434681e-3	0.01277	2.219698e-3	0.01034	6.637454e-4	3.919470e-3	1.010148e-3	6.782955e-3	1.095487e-3	0.01361	3.940992e-3	9.130737e-3	2.736891e-3	0.01168	3.565176e-3	0.01270	3.674973e-3	0.01671	4.824567e-3	0.01725	5.852045e-3	0.02755	2.717860e-3	6.373500e-3	2.871818e-3	7.967241e-3	2.510155e-3	0.01052	1.147128e-3	7.064506e-3	1.304817e-3	0.01410	1.980096e-3	0.01733	2.548092e-3	0.01345	2.725785e-3	0.01588	5.535915e-3	0.03371	2.366686e-3	0.01943	4.903092e-3	0.04065	3.047755e-3	0.02353	7.242158e-3	0.01911	3.131548e-3
60.00000	3.464761e-3	0.01302	2.297313e-3	0.01044	6.707668e-4	3.958845e-3	1.013071e-3	7.071285e-3	1.198625e-3	0.01400	3.966748e-3	9.265150e-3	2.789624e-3	0.01186	3.611930e-3	0.01287	3.732151e-3	0.01688	4.923581e-3	0.01771	5.927723e-3	0.02830	2.725896e-3	6.417070e-3	2.936967e-3	8.053230e-3	2.538357e-3	0.01076	1.148367e-3	7.202015e-3	1.337695e-3	0.01441	2.019350e-3	0.01764	2.544638e-3	0.01373	2.759970e-3	0.01614	5.647374e-3	0.03457	2.391122e-3	0.01974	4.979141e-3	0.04150	3.096088e-3	0.02408	7.399924e-3	0.01964	3.193345e-3
61.00000	3.454198e-3	0.01325	2.316523e-3	0.01056	6.623268e-4	3.996778e-3	1.014045e-3	7.361376e-3	1.317539e-3	0.01450	3.983178e-3	9.395685e-3	2.843408e-3	0.01205	3.650821e-3	0.01304	3.778942e-3	0.01703	4.992279e-3	0.01819	6.029967e-3	0.02903	2.723854e-3	6.465722e-3	2.990034e-3	8.142851e-3	2.572642e-3	0.01100	1.137985e-3	7.354124e-3	1.365328e-3	0.01474	2.064312e-3	0.01798	2.533147e-3	0.01401	2.803257e-3	0.01641	5.764241e-3	0.03541	2.425110e-3	0.02007	5.069737e-3	0.04236	3.146155e-3	0.02462	7.566685e-3	0.02018	3.264263e-3
62.00000	3.455002e-3	0.01346	2.311152e-3	0.01068	6.583095e-4	4.035938e-3	1.014737e-3	7.664009e-3	1.342767e-3	0.01502	4.010402e-3	9.524500e-3	2.868737e-3	0.01222	3.720601e-3	0.01320	3.835808e-3	0.01721	5.080539e-3	0.01866	6.161771e-3	0.02979	2.721378e-3	6.512029e-3	3.006211e-3	8.224074e-3	2.595190e-3	0.01125	1.130286e-3	7.515155e-3	1.381981e-3	0.01506	2.097418e-3	0.01830	2.526695e-3	0.01431	2.856688e-3	0.01668	5.886407e-3	0.03626	2.457809e-3	0.02040	5.172439e-3	0.04321	3.200994e-3	0.02519	7.738902e-3	0.02075	3.343758e-3
63.00000	3.482065e-3	0.01367	2.285797e-3	0.01079	6.599426e-4	4.076135e-3	1.015460e-3	7.990467e-3	1.353961e-3	0.01553	4.044541e-3	9.669582e-3	2.882098e-3	0.01238	3.779794e-3	0.01339	3.907538e-3	0.01739	5.152495e-3	0.01913	6.278220e-3	0.03053	2.727373e-3	6.556729e-3	3.058145e-3	8.312227e-3	2.625479e-3	0.01150	1.123664e-3	7.673989e-3	1.394308e-3	0.01538	2.126017e-3	0.01864	2.517354e-3	0.01459	2.900121e-3	0.01696	6.020024e-3	0.03716	2.497578e-3	0.02076	5.303059e-3	0.04412	3.235462e-3	0.02577	7.931221e-3	0.02134	3.421852e-3
64.00000	3.487698e-3	0.01383	2.232401e-3	0.01090	6.607771e-4	4.111743e-3	1.018163e-3	8.316423e-3	1.473788e-3	0.01608	4.081932e-3	9.815780e-3	2.900291e-3	0.01252	3.830760e-3	0.01357	4.002306e-3	0.01759	5.240074e-3	0.01960	6.394568e-3	0.03127	2.724115e-3	6.606250e-3	3.090732e-3	8.401977e-3	2.686819e-3	0.01176	1.111866e-3	7.835816e-3	1.410615e-3	0.01571	2.160629e-3	0.01897	2.517882e-3	0.01488	2.939912e-3	0.01724	6.151228e-3	0.03808	2.543371e-3	0.02111	5.417574e-3	0.04504	3.279560e-3	0.02635	8.119378e-3	0.02195	3.449926e-3
65.00000	3.486592e-3	0.01398	2.181174e-3	0.01099	6.642342e-4	4.143417e-3	1.011845e-3	8.660389e-3	1.486981e-3	0.01662	4.110600e-3	9.967891e-3	2.901316e-3	0.01265	3.907579e-3	0.01376	4.078511e-3	0.01780	5.309813e-3	0.02007	6.512293e-3	0.03204	2.728372e-3	6.657727e-3	3.127415e-3	8.492809e-3	2.754808e-3	0.01202	1.115612e-3	8.000092e-3	1.429021e-3	0.01604	2.216946e-3	0.01935	2.534253e-3	0.01515	3.001058e-3	0.01753	6.291910e-3	0.03901	2.602392e-3	0.02148	5.529758e-3	0.04602	3.330127e-3	0.02695	8.287104e-3	0.02255	3.461244e-3
66.00000	3.500877e-3	0.01414	2.150397e-3	0.01110	6.688237e-4	4.176450e-3	1.040449e-3	9.019600e-3	1.501452e-3	0.01716	4.153437e-3	0.01012	2.895332e-3	0.01277	3.981385e-3	0.01397	4.148365e-3	0.01803	5.384953e-3	0.02054	6.638336e-3	0.03280	2.728893e-3	6.707292e-3	3.161625e-3	8.585083e-3	2.821967e-3	0.01231	1.105156e-3	8.155165e-3	1.434684e-3	0.01638	2.243932e-3	0.01973	2.560223e-3	0.01540	3.057887e-3	0.01781	6.436782e-3	0.03997	2.640457e-3	0.02184	5.639881e-3	0.04701	3.410561e-3	0.02755	8.440732e-3	0.02316	3.458922e-3
67.00000	3.494740e-3	0.01428	2.090907e-3	0.01120	6.708264e-4	4.197431e-3	1.068266e-3	9.371613e-3	1.517556e-3	0.01770	4.222771e-3	0.01027	2.876442e-3	0.01288	4.050216e-3	0.01418	4.248772e-3	0.01827	5.445065e-3	0.02098	6.748271e-3	0.03356	2.796008e-3	6.762113e-3	3.202456e-3	8.679650e-3	2.886997e-3	0.01259	1.098637e-3	8.311713e-3	1.442254e-3	0.01672	2.291665e-3	0.02011	2.577749e-3	0.01565	3.120394e-3	0.01812	6.609171e-3	0.04094	2.672718e-3	0.02223	5.771004e-3	0.04800	3.500503e-3	0.02815	8.571426e-3	0.02374	3.440240e-3
68.00000	3.507014e-3	0.01441	2.057858e-3	0.01129	6.763577e-4	4.223943e-3	1.096493e-3	9.713914e-3	1.532880e-3	0.01822	4.292833e-3	0.01042	2.846672e-3	0.01298	4.171350e-3	0.01441	4.346803e-3	0.01852	5.526685e-3	0.02142	6.888430e-3	0.03436	2.859647e-3	6.827099e-3	3.261628e-3	8.788901e-3	2.942683e-3	0.01291	1.095142e-3	8.460563e-3	1.441383e-3	0.01703	2.330356e-3	0.02049	2.602464e-3	0.01588	3.165177e-3	0.01842	6.759244e-3	0.04196	2.697555e-3	0.02264	5.905769e-3	0.04901	3.587405e-3	0.02877	8.722943e-3	0.02432	3.425241e-3
69.00000	3.615363e-3	0.01456	2.029197e-3	0.01138	6.822467e-4	4.258800e-3	1.120947e-3	0.01006	1.558777e-3	0.01874	4.346503e-3	0.01057	2.821697e-3	0.01308	4.245181e-3	0.01465	4.479249e-3	0.01878	5.606917e-3	0.02187	7.064286e-3	0.03519	2.967726e-3	6.899643e-3	3.307404e-3	8.894623e-3	2.997193e-3	0.01321	1.098962e-3	8.613556e-3	1.431024e-3	0.01735	2.375196e-3	0.02091	2.658054e-3	0.01613	3.230126e-3	0.01873	6.940904e-3	0.04300	2.718280e-3	0.02303	6.045306e-3	0.05005	3.696424e-3	0.02942	8.877475e-3	0.02489	3.406894e-3
70.00000	3.719688e-3	0.01471	1.980294e-3	0.01145	6.870389e-4	4.298794e-3	1.142919e-3	0.01041	1.482644e-3	0.01914	4.428627e-3	0.01072	2.793357e-3	0.01318	4.361116e-3	0.01491	4.597707e-3	0.01905	5.676197e-3	0.02232	7.230798e-3	0.03606	3.033494e-3	6.970494e-3	3.346921e-3	8.977314e-3	3.068665e-3	0.01354	1.106469e-3	8.774086e-3	1.425195e-3	0.01768	2.418012e-3	0.02135	2.718694e-3	0.01640	3.309977e-3	0.01906	7.107203e-3	0.04406	2.747437e-3	0.02343	6.163108e-3	0.05111	3.781228e-3	0.03007	9.030102e-3	0.02546	3.431956e-3
71.00000	3.816368e-3	0.01487	1.928602e-3	0.01147	7.003307e-4	4.350829e-3	1.142762e-3	0.01077	1.508176e-3	0.01944	4.535364e-3	0.01087	2.762713e-3	0.01327	4.433247e-3	0.01517	4.739741e-3	0.01934	5.767319e-3	0.02277	7.412653e-3	0.03692	3.100565e-3	7.040215e-3	3.383321e-3	9.053797e-3	3.131539e-3	0.01387	1.130773e-3	8.921269e-3	1.419044e-3	0.01799	2.438301e-3	0.02179	2.770031e-3	0.01665	3.374325e-3	0.01941	7.267679e-3	0.04514	2.779917e-3	0.02383	6.286810e-3	0.05218	3.872292e-3	0.03073	9.205468e-3	0.02601	3.480386e-3
72.00000	3.908922e-3	0.01504	1.935677e-3	0.01148	7.135510e-4	4.414856e-3	1.139775e-3	0.01113	1.619123e-3	0.01972	4.632161e-3	0.01102	2.774252e-3	0.01336	4.543281e-3	0.01546	4.865086e-3	0.01963	5.844280e-3	0.02322	7.555304e-3	0.03778	3.164422e-3	7.115192e-3	3.447619e-3	9.140095e-3	3.187556e-3	0.01420	1.152496e-3	9.064839e-3	1.423860e-3	0.01831	2.474009e-3	0.02223	2.826542e-3	0.01691	3.428418e-3	0.01977	7.430189e-3	0.04622	2.830723e-3	0.02425	6.423317e-3	0.05329	3.963003e-3	0.03141	9.377795e-3	0.02651	3.509590e-3
73.00000	3.976024e-3	0.01520	1.967797e-3	0.01150	7.266760e-4	4.488158e-3	1.140341e-3	0.01151	1.722761e-3	0.02000	4.733802e-3	0.01115	2.765332e-3	0.01343	4.620412e-3	0.01574	4.961030e-3	0.01993	5.947631e-3	0.02368	7.699421e-3	0.03866	3.224499e-3	7.205286e-3	3.506019e-3	9.232576e-3	3.234214e-3	0.01453	1.183098e-3	9.214677e-3	1.442552e-3	0.01864	2.508621e-3	0.02267	2.878026e-3	0.01717	3.496016e-3	0.02013	7.559250e-3	0.04729	2.871661e-3	0.02466	6.541684e-3	0.05440	4.074499e-3	0.03211	9.516399e-3	0.02700	3.541576e-3
74.00000	3.911739e-3	0.01540	2.024085e-3	0.01151	7.359385e-4	4.561555e-3	1.160961e-3	0.01191	1.737635e-3	0.02026	4.836234e-3	0.01128	2.763447e-3	0.01350	4.713257e-3	0.01605	5.066112e-3	0.02023	6.028433e-3	0.02412	7.883130e-3	0.03955	3.288964e-3	7.293556e-3	3.550997e-3	9.321734e-3	3.257024e-3	0.01484	1.215071e-3	9.368172e-3	1.471031e-3	0.01897	2.550158e-3	0.02311	2.936331e-3	0.01745	3.592512e-3	0.02051	7.682305e-3	0.04835	2.912708e-3	0.02509	6.674707e-3	0.05553	4.179686e-3	0.03284	9.654355e-3	0.02749	3.595905e-3
75.00000	3.833671e-3	0.01564	2.069683e-3	0.01153	7.483482e-4	4.640269e-3	1.183844e-3	0.01235	1.842491e-3	0.02052	4.949209e-3	0.01142	2.781363e-3	0.01357	4.816603e-3	0.01634	5.201533e-3	0.02053	6.135388e-3	0.02457	8.104328e-3	0.04048	3.337617e-3	7.384737e-3	3.610066e-3	9.430469e-3	3.269895e-3	0.01514	1.239936e-3	9.513541e-3	1.500893e-3	0.01931	2.565151e-3	0.02352	2.995546e-3	0.01774	3.675148e-3	0.02091	7.812377e-3	0.04942	2.948254e-3	0.02555	6.808124e-3	0.05665	4.269969e-3	0.03356	9.834201e-3	0.02801	3.687136e-3
76.00000	3.766770e-3	0.01598	2.117708e-3	0.01155	7.599115e-4	4.724276e-3	1.203426e-3	0.01283	1.932633e-3	0.02079	5.037082e-3	0.01156	2.812309e-3	0.01363	4.930487e-3	0.01663	5.355030e-3	0.02084	6.242034e-3	0.02505	8.342047e-3	0.04146	3.408597e-3	7.489514e-3	3.698579e-3	9.550127e-3	3.283152e-3	0.01542	1.273856e-3	9.653011e-3	1.519585e-3	0.01965	2.578393e-3	0.02392	3.055179e-3	0.01805	3.780574e-3	0.02131	7.930535e-3	0.05048	3.005169e-3	0.02603	6.934757e-3	0.05779	4.381417e-3	0.03430	0.01005	0.02853	3.783576e-3
77.00000	3.578643e-3	0.01632	2.173170e-3	0.01156	7.775545e-4	4.819095e-3	1.228950e-3	0.01331	1.919051e-3	0.02106	5.119168e-3	0.01170	2.862487e-3	0.01371	5.034883e-3	0.01692	5.510890e-3	0.02116	6.397902e-3	0.02558	8.652913e-3	0.04249	3.485703e-3	7.598374e-3	3.777072e-3	9.670146e-3	3.312267e-3	0.01570	1.305815e-3	9.790269e-3	1.539111e-3	0.02000	2.598362e-3	0.02432	3.124189e-3	0.01834	3.856022e-3	0.02170	8.063335e-3	0.05154	3.067330e-3	0.02651	7.037852e-3	0.05893	4.469491e-3	0.03502	0.01029	0.02908	3.874724e-3
78.00000	3.405305e-3	0.01664	2.220524e-3	0.01159	7.924080e-4	4.927397e-3	1.252807e-3	0.01383	1.902338e-3	0.02135	5.188251e-3	0.01184	2.915309e-3	0.01379	5.115977e-3	0.01720	5.653449e-3	0.02149	6.533315e-3	0.02614	8.909232e-3	0.04354	3.567023e-3	7.705323e-3	3.830087e-3	9.773008e-3	3.342045e-3	0.01595	1.345162e-3	9.937997e-3	1.563561e-3	0.02038	2.638865e-3	0.02472	3.192757e-3	0.01865	3.965190e-3	0.02211	8.190398e-3	0.05256	3.146077e-3	0.02701	7.160425e-3	0.06008	4.556052e-3	0.03575	0.01058	0.02968	3.952755e-3
79.00000	3.206614e-3	0.01695	2.258273e-3	0.01161	7.882953e-4	5.035436e-3	1.278802e-3	0.01434	1.980761e-3	0.02166	5.278897e-3	0.01198	2.966221e-3	0.01388	5.217373e-3	0.01748	5.766757e-3	0.02182	6.679271e-3	0.02673	9.180131e-3	0.04461	3.636309e-3	7.810143e-3	3.913577e-3	9.876978e-3	3.368035e-3	0.01620	1.379362e-3	0.01010	1.585734e-3	0.02076	2.687830e-3	0.02512	3.262738e-3	0.01897	4.083299e-3	0.02253	8.297289e-3	0.05357	3.195022e-3	0.02752	7.264011e-3	0.06127	4.624818e-3	0.03648	0.01082	0.03031	4.065826e-3
80.00000	3.017984e-3	0.01726	2.302580e-3	0.01166	7.986546e-4	5.152440e-3	1.313755e-3	0.01484	2.058953e-3	0.02200	5.377426e-3	0.01213	3.039084e-3	0.01398	5.269627e-3	0.01776	5.897365e-3	0.02217	6.835672e-3	0.02732	9.455012e-3	0.04571	3.717846e-3	7.921654e-3	4.020793e-3	9.981978e-3	3.388509e-3	0.01643	1.415346e-3	0.01024	1.599753e-3	0.02113	2.779900e-3	0.02552	3.327987e-3	0.01930	4.172374e-3	0.02294	8.410550e-3	0.05457	3.246559e-3	0.02805	7.376158e-3	0.06245	4.729760e-3	0.03724	0.01107	0.03097	4.172036e-3
81.00000	2.832472e-3	0.01760	2.354943e-3	0.01174	8.108616e-4	5.285800e-3	1.377940e-3	0.01531	2.038001e-3	0.02243	5.472465e-3	0.01228	3.118778e-3	0.01408	5.382411e-3	0.01804	6.038999e-3	0.02252	7.004251e-3	0.02792	9.749971e-3	0.04686	3.815586e-3	8.038029e-3	4.108250e-3	0.01010	3.390334e-3	0.01670	1.451272e-3	0.01040	1.612592e-3	0.02151	2.906248e-3	0.02597	3.403720e-3	0.01965	4.253428e-3	0.02336	8.538880e-3	0.05558	3.318734e-3	0.02862	7.502375e-3	0.06368	4.868365e-3	0.03805	0.01132	0.03167	4.253895e-3
82.00000	2.648973e-3	0.01794	2.414949e-3	0.01182	8.122683e-4	5.414152e-3	1.424366e-3	0.01576	2.022141e-3	0.02287	5.572475e-3	0.01244	3.184442e-3	0.01417	5.472006e-3	0.01831	6.225798e-3	0.02289	7.173474e-3	0.02859	0.01001	0.04806	3.901901e-3	8.152189e-3	4.183677e-3	0.01021	3.393596e-3	0.01696	1.487036e-3	0.01057	1.630902e-3	0.02189	3.044421e-3	0.02648	3.478605e-3	0.02002	4.347005e-3	0.02381	8.684398e-3	0.05661	3.379252e-3	0.02922	7.607175e-3	0.06488	4.988466e-3	0.03887	0.01159	0.03239	4.333370e-3
83.00000	2.472918e-3	0.01828	2.445107e-3	0.01190	8.142352e-4	5.538201e-3	1.482453e-3	0.01624	2.024955e-3	0.02340	5.662945e-3	0.01261	3.266667e-3	0.01428	5.589803e-3	0.01858	6.432837e-3	0.02325	7.340666e-3	0.02928	0.01034	0.04930	3.986652e-3	8.255750e-3	4.275024e-3	0.01033	3.383007e-3	0.01723	1.516531e-3	0.01074	1.651931e-3	0.02228	3.222063e-3	0.02703	3.545907e-3	0.02041	4.476068e-3	0.02425	8.880455e-3	0.05771	3.444528e-3	0.02985	7.743596e-3	0.06611	5.101525e-3	0.03972	0.01189	0.03312	4.414789e-3
84.00000	2.438813e-3	0.01857	2.448825e-3	0.01199	8.211613e-4	5.666709e-3	1.472300e-3	0.01668	2.017159e-3	0.02395	5.779372e-3	0.01279	3.359685e-3	0.01439	5.728564e-3	0.01884	6.627312e-3	0.02361	7.551120e-3	0.03001	0.01061	0.05053	4.067233e-3	8.364045e-3	4.366371e-3	0.01044	3.384942e-3	0.01751	1.553917e-3	0.01092	1.681852e-3	0.02267	3.411196e-3	0.02764	3.613037e-3	0.02081	4.574319e-3	0.02470	9.073663e-3	0.05885	3.512067e-3	0.03050	7.895914e-3	0.06739	5.253555e-3	0.04058	0.01219	0.03384	4.470938e-3
85.00000	2.333784e-3	0.01883	2.460444e-3	0.01208	8.223057e-4	5.804098e-3	1.473338e-3	0.01708	2.020776e-3	0.02449	5.876909e-3	0.01297	3.440784e-3	0.01451	5.857412e-3	0.01912	6.808698e-3	0.02397	7.774657e-3	0.03078	0.01085	0.05176	4.144208e-3	8.469257e-3	4.452206e-3	0.01054	3.381569e-3	0.01777	1.590845e-3	0.01111	1.723599e-3	0.02307	3.604697e-3	0.02829	3.697127e-3	0.02123	4.685694e-3	0.02513	9.263898e-3	0.06003	3.583415e-3	0.03114	8.039119e-3	0.06872	5.386302e-3	0.04149	0.01247	0.03454	4.531773e-3
86.00000	2.207125e-3	0.01895	2.450684e-3	0.01217	8.248687e-4	5.942750e-3	1.481007e-3	0.01745	2.037087e-3	0.02504	6.014397e-3	0.01316	3.536180e-3	0.01464	5.963971e-3	0.01941	6.982959e-3	0.02434	7.973875e-3	0.03159	0.01108	0.05297	4.224659e-3	8.567952e-3	4.539663e-3	0.01066	3.385550e-3	0.01806	1.623836e-3	0.01132	1.755321e-3	0.02348	3.825656e-3	0.02899	3.777297e-3	0.02165	4.771605e-3	0.02557	9.471613e-3	0.06128	3.648265e-3	0.03181	8.197791e-3	0.07008	5.517913e-3	0.04244	0.01262	0.03491	4.558773e-3
87.00000	2.203202e-3	0.01907	2.471650e-3	0.01227	8.263111e-4	6.072366e-3	1.462242e-3	0.01782	2.058526e-3	0.02559	6.152739e-3	0.01336	3.610068e-3	0.01477	6.091043e-3	0.01973	7.162871e-3	0.02471	8.172807e-3	0.03240	0.01130	0.05415	4.294771e-3	8.668125e-3	4.617692e-3	0.01080	3.379703e-3	0.01833	1.660927e-3	0.01154	1.792419e-3	0.02388	4.032643e-3	0.02973	3.856582e-3	0.02209	4.855970e-3	0.02600	9.664430e-3	0.06260	3.736504e-3	0.03248	8.355383e-3	0.07148	5.665525e-3	0.04347	0.01275	0.03530	4.605337e-3
88.00000	2.180868e-3	0.01919	2.441492e-3	0.01238	8.298516e-4	6.189656e-3	1.444074e-3	0.01817	2.186819e-3	0.02614	6.301310e-3	0.01355	3.671114e-3	0.01489	6.221366e-3	0.02004	7.349458e-3	0.02508	8.375518e-3	0.03319	0.01152	0.05532	4.375178e-3	8.762606e-3	4.737942e-3	0.01097	3.382246e-3	0.01860	1.698062e-3	0.01177	1.827061e-3	0.02427	4.243024e-3	0.03054	3.929685e-3	0.02254	4.954196e-3	0.02643	9.854105e-3	0.06402	3.807524e-3	0.03317	8.479208e-3	0.07290	5.788226e-3	0.04452	0.01282	0.03565	4.673215e-3
89.00000	2.158534e-3	0.01931	2.408597e-3	0.01248	8.372545e-4	6.300020e-3	1.424554e-3	0.01853	2.202497e-3	0.02668	6.430565e-3	0.01375	3.755388e-3	0.01501	6.349214e-3	0.02038	7.538170e-3	0.02546	8.584895e-3	0.03400	0.01175	0.05654	4.466532e-3	8.855872e-3	4.845210e-3	0.01116	3.395780e-3	0.01888	1.735669e-3	0.01201	1.870668e-3	0.02466	4.469235e-3	0.03140	4.017253e-3	0.02302	5.007737e-3	0.02687	0.01008	0.06549	3.870597e-3	0.03389	8.616500e-3	0.07430	5.934813e-3	0.04564	0.01295	0.03599	4.692590e-3
90.00000	2.130768e-3	0.01942	2.388612e-3	0.01256	8.280516e-4	6.394625e-3	1.404249e-3	0.01889	2.214398e-3	0.02723	6.567852e-3	0.01395	3.831224e-3	0.01514	6.504464e-3	0.02074	7.720769e-3	0.02586	8.806177e-3	0.03485	0.01199	0.05781	4.556409e-3	8.949224e-3	4.941992e-3	0.01135	3.427549e-3	0.01916	1.772922e-3	0.01227	1.908040e-3	0.02506	4.661031e-3	0.03228	4.090381e-3	0.02348	5.091845e-3	0.02731	0.01031	0.06702	3.941739e-3	0.03459	8.766844e-3	0.07569	6.065424e-3	0.04678
91.00000	2.104510e-3	0.01950	2.356286e-3	0.01262	8.221030e-4	6.460714e-3	1.381586e-3	0.01926	2.218539e-3	0.02778	6.670773e-3	0.01416	3.895003e-3	0.01527	6.655339e-3	0.02110	7.909506e-3	0.02628	9.033815e-3	0.03573	0.01218	0.05911	4.648936e-3	9.041881e-3	5.057580e-3	0.01153	3.485004e-3	0.01942	1.791828e-3	0.01252	1.956928e-3	0.02547	4.832888e-3	0.03317	4.145798e-3	0.02395	5.184564e-3	0.02773	0.01053	0.06855	4.022980e-3	0.03528	8.941805e-3	0.07708	6.178324e-3	0.04799
92.00000	2.081875e-3	0.01956	2.326799e-3	0.01269	8.293271e-4	6.524563e-3	1.379197e-3	0.01963	2.227773e-3	0.02834	6.791179e-3	0.01437	3.955935e-3	0.01540	6.827916e-3	0.02148	8.109669e-3	0.02673	9.262581e-3	0.03661	0.01247	0.06046	4.749282e-3	9.137797e-3	5.147021e-3	0.01172	3.543509e-3	0.01967	1.809732e-3	0.01275	1.995039e-3	0.02589	5.014152e-3	0.03407	4.224775e-3	0.02440	5.263446e-3	0.02813	0.01077	0.07013	4.105707e-3	0.03596	9.153294e-3	0.07851	6.275259e-3	0.04926
93.00000	2.046161e-3	0.01961	2.334029e-3	0.01276	8.365512e-4	6.585455e-3	1.357697e-3	0.01997	2.234083e-3	0.02878	6.907518e-3	0.01458	4.011262e-3	0.01554	6.973702e-3	0.02184	8.288305e-3	0.02721	9.459667e-3	0.03749	0.01272	0.06186	4.841331e-3	9.242617e-3	5.222242e-3	0.01193	3.642700e-3	0.01997	1.830114e-3	0.01298	2.039313e-3	0.02633	5.167608e-3	0.03499	4.321131e-3	0.02483	5.296062e-3	0.02854	0.01096	0.07170	4.191354e-3	0.03663	9.380495e-3	0.07996	6.392590e-3	0.05056
94.00000	2.030768e-3	0.01967	2.360055e-3	0.01284	8.289933e-4	6.646752e-3	1.383786e-3	0.02033	2.237031e-3	0.02930	6.984308e-3	0.01480	4.056645e-3	0.01566	7.117076e-3	0.02221	8.488093e-3	0.02770	9.654722e-3	0.03837	0.01299	0.06330	4.922608e-3	9.343441e-3	5.305732e-3	0.01215	3.738434e-3	0.02028	1.833196e-3	0.01321	2.069211e-3	0.02679	5.304412e-3	0.03592	4.405419e-3	0.02526	5.376465e-3	0.02893	0.01117	0.07326	4.293417e-3	0.03729	9.573364e-3	0.08142	6.485070e-3	0.05187
95.00000	2.060748e-3	0.01971	2.383448e-3	0.01291	8.214951e-4	6.692874e-3	1.400791e-3	0.02069	2.230587e-3	0.02982	7.076736e-3	0.01501	4.121486e-3	0.01579	7.285878e-3	0.02258	8.679668e-3	0.02820	9.838515e-3	0.03927	0.01326	0.06477	5.022563e-3	9.450303e-3	5.385744e-3	0.01239	3.868689e-3	0.02064	1.825851e-3	0.01344	2.075791e-3	0.02725	5.443544e-3	0.03685	4.464572e-3	0.02569	5.443389e-3	0.02931	0.01139	0.07483	4.392146e-3	0.03796	9.753821e-3	0.08286	6.590501e-3	0.05319
96.00000	2.109239e-3	0.01975	2.421662e-3	0.01299	8.234143e-4	6.740117e-3	1.402834e-3	0.02105	2.225641e-3	0.03032	7.116273e-3	0.01512	4.129243e-3	0.01586	7.371180e-3	0.02278	8.779020e-3	0.02844	9.947862e-3	0.03970	0.01339	0.06549	5.073440e-3	9.501982e-3	5.428275e-3	0.01250	3.922010e-3	0.02080	1.833873e-3	0.01356	2.089288e-3	0.02747	5.519986e-3	0.03731	4.501045e-3	0.02591	5.477269e-3	0.02950	0.01150	0.07563	4.430050e-3	0.03830	9.845579e-3	0.08355	6.630406e-3	0.05385
97.00000	2.152095e-3	0.01977	2.416601e-3	0.01304	8.126378e-4	6.796157e-3	1.435681e-3	0.02140	2.319924e-3	0.03079	7.152217e-3	0.01522	4.157918e-3	0.01592	7.441478e-3	0.02296	8.866255e-3	0.02871	0.01004	0.04013	0.01350	0.06625	5.129979e-3	9.547793e-3	5.492290e-3	0.01261	3.981196e-3	0.02096	1.837060e-3	0.01368	2.102628e-3	0.02770	5.607985e-3	0.03780	4.540508e-3	0.02614	5.532375e-3	0.02971	0.01161	0.07642	4.438304e-3	0.03864	9.932587e-3	0.08423	6.658027e-3	0.05451
98.00000	2.183685e-3	0.01978	2.464730e-3	0.01311	8.052349e-4	6.849408e-3	1.471075e-3	0.02175	2.308924e-3	0.03126	7.184481e-3	0.01534	4.202737e-3	0.01598	7.504054e-3	0.02316	8.954055e-3	0.02898	0.01014	0.04058	0.01363	0.06710	5.173194e-3	9.598874e-3	5.520277e-3	0.01270	4.042145e-3	0.02113	1.831803e-3	0.01378	2.118911e-3	0.02792	5.696013e-3	0.03828	4.576040e-3	0.02636	5.548293e-3	0.02992	0.01173	0.07717	4.459175e-3	0.03897	0.01006	0.08491	6.726147e-3	0.05522
99.00000	2.224831e-3	0.01980	2.537749e-3	0.01318	8.142829e-4	6.906044e-3	1.508511e-3	0.02212	2.314455e-3	0.03173	7.231223e-3	0.01545	4.220092e-3	0.01605	7.609700e-3	0.02334	9.081790e-3	0.02928	0.01023	0.04104	0.01374	0.06796	5.209673e-3	9.655397e-3	5.528269e-3	0.01279	4.111129e-3	0.02131	1.820198e-3	0.01388	2.129853e-3	0.02815	5.750344e-3	0.03875	4.571264e-3	0.02654	5.596705e-3	0.03013	0.01183	0.07791	4.531237e-3	0.03930	0.01021	0.08560	6.760970e-3	0.05591
100.00000	2.261652e-3	0.01982	2.595896e-3	0.01325	8.308887e-4	6.970656e-3	1.540760e-3	0.02250	2.325211e-3	0.03217
101.00000	2.323925e-3	0.01983	2.653887e-3	0.01331	8.384228e-4	7.038355e-3	1.570024e-3	0.02286	2.339280e-3	0.03249
102.00000	2.377144e-3	0.01985	2.723963e-3	0.01337	8.512378e-4	7.098651e-3	1.599445e-3	0.02324	2.344433e-3	0.03281
103.00000	2.436600e-3	0.01988	2.780302e-3	0.01341	8.640409e-4	7.153904e-3	1.628237e-3	0.02361	2.340474e-3	0.03312
104.00000	2.386601e-3	0.01990	2.838036e-3	0.01346	8.904099e-4	7.206082e-3	1.660141e-3	0.02395	2.337465e-3	0.03334
105.00000	2.368693e-3	0.01992	2.823887e-3	0.01351	9.188056e-4	7.273209e-3	1.693554e-3	0.02432	2.338013e-3	0.03364
106.00000	2.347466e-3	0.01995	2.817483e-3	0.01356	9.385347e-4	7.343090e-3	1.736868e-3	0.02469	2.341522e-3	0.03403
107.00000	2.315374e-3	0.01998	2.813197e-3	0.01362	9.706140e-4	7.411242e-3	1.778956e-3	0.02508	2.353812e-3	0.03443
108.00000	2.295957e-3	0.02001	2.802146e-3	0.01366	9.949088e-4	7.479966e-3	1.825005e-3	0.02548	2.369782e-3	0.03483
109.00000	2.270605e-3	0.02004	2.776584e-3	0.01371	1.003826e-3	7.546461e-3	1.846945e-3	0.02586	2.370903e-3	0.03521
110.00000	2.236803e-3	0.02007	2.720193e-3	0.01376	1.009858e-3	7.615435e-3	1.866402e-3	0.02624	2.368186e-3	0.03560
111.00000	2.209640e-3	0.02011	2.673459e-3	0.01383	1.020646e-3	7.688439e-3	1.888750e-3	0.02662	2.369271e-3	0.03598
112.00000	2.159138e-3	0.02015	2.612472e-3	0.01391	1.022792e-3	7.774627e-3	1.907798e-3	0.02698	2.377700e-3	0.03637
113.00000	2.123122e-3	0.02018	2.557579e-3	0.01399	1.027715e-3	7.875371e-3	1.937439e-3	0.02734	2.405680e-3	0.03676
114.00000	2.168192e-3	0.02021	2.503253e-3	0.01406	1.041234e-3	7.978165e-3	1.968872e-3	0.02769	2.431712e-3	0.03716
115.00000	2.222417e-3	0.02025	2.521172e-3	0.01413	1.036465e-3	8.068430e-3	2.005271e-3	0.02800	2.464528e-3	0.03748
116.00000	2.264569e-3	0.02029	2.539298e-3	0.01420	1.035535e-3	8.153665e-3	2.046133e-3	0.02832	2.482532e-3	0.03770
117.00000	2.315877e-3	0.02032	2.562071e-3	0.01427	1.030934e-3	8.231688e-3	2.087027e-3	0.02865	2.495493e-3	0.03790
118.00000	2.371711e-3	0.02035	2.587582e-3	0.01434	1.032257e-3	8.309615e-3	2.119371e-3	0.02895	2.508551e-3	0.03808
119.00000	2.448974e-3	0.02040	2.604313e-3	0.01444	1.044822e-3	8.387601e-3	2.177332e-3	0.02926	2.534217e-3	0.03827
120.00000	2.525030e-3	0.02045	2.673252e-3	0.01454	1.050687e-3	8.455682e-3	2.247836e-3	0.02955	2.581018e-3	0.03847
121.00000	2.590321e-3	0.02050	2.733103e-3	0.01462	1.060593e-3	8.524632e-3	2.304823e-3	0.02982	2.619169e-3	0.03866
122.00000	2.659637e-3	0.02054	2.799874e-3	0.01470	1.052320e-3	8.580256e-3	2.368379e-3	0.03010	2.656822e-3	0.03885
123.00000	2.728549e-3	0.02060	2.871189e-3	0.01478	1.047719e-3	8.625162e-3	2.435834e-3	0.03037	2.694596e-3	0.03904
124.00000	2.808026e-3	0.02066	2.946119e-3	0.01486	1.027882e-3	8.666980e-3	2.501339e-3	0.03065	2.734709e-3	0.03924
125.00000	2.872009e-3	0.02072	3.011289e-3	0.01495	1.030052e-3	8.716667e-3	2.567064e-3	0.03093	2.772970e-3	0.03945
126.00000	2.941526e-3	0.02079	3.081571e-3	0.01504	1.032186e-3	8.773720e-3	2.648915e-3	0.03119	2.826763e-3	0.03967
127.00000	3.022611e-3	0.02091	3.150355e-3	0.01515	1.037610e-3	8.837581e-3	2.731205e-3	0.03142	2.870433e-3	0.03991
128.00000	3.032269e-3	0.02104	3.220069e-3	0.01526	1.041877e-3	8.907521e-3	2.842791e-3	0.03168	2.918768e-3	0.04027
129.00000	3.028245e-3	0.02118	3.317049e-3	0.01534	1.050901e-3	8.986771e-3	2.955319e-3	0.03194	2.967323e-3	0.04063
130.00000	3.038406e-3	0.02132	3.392599e-3	0.01542	1.061630e-3	9.077835e-3	3.061153e-3	0.03220	3.008300e-3	0.04100
131.00000	3.042430e-3	0.02148	3.470575e-3	0.01553	1.073205e-3	9.167671e-3	3.189083e-3	0.03249	3.064115e-3	0.04138
132.00000	3.065770e-3	0.02166	3.559603e-3	0.01566	1.100707e-3	9.260297e-3	3.293251e-3	0.03278	3.106347e-3	0.04179
133.00000	3.077138e-3	0.02182	3.644086e-3	0.01579	1.119924e-3	9.351635e-3	3.416215e-3	0.03309	3.141746e-3	0.04220
134.00000	3.076736e-3	0.02199	3.724387e-3	0.01596	1.150203e-3	9.448886e-3	3.530000e-3	0.03342	3.183954e-3	0.04260
135.00000	3.077541e-3	0.02215	3.833554e-3	0.01612	1.169562e-3	9.540427e-3	3.653593e-3	0.03378	3.236419e-3	0.04300
136.00000	3.084180e-3	0.02231	3.928933e-3	0.01629	1.197767e-3	9.618545e-3	3.724568e-3	0.03417	3.268017e-3	0.04340
137.00000	3.079754e-3	0.02245	4.035053e-3	0.01649	1.219320e-3	9.688509e-3	3.800006e-3	0.03456	3.313332e-3	0.04382
138.00000	3.156514e-3	0.02265	4.145408e-3	0.01670	1.242971e-3	9.748757e-3	3.872489e-3	0.03496	3.345685e-3	0.04415
139.00000	3.235990e-3	0.02283	4.231699e-3	0.01692	1.266122e-3	9.797442e-3	3.926333e-3	0.03539	3.383045e-3	0.04451
140.00000	3.303092e-3	0.02301	4.320726e-3	0.01712	1.287496e-3	9.833789e-3	3.997088e-3	0.03587	3.420247e-3	0.04489
141.00000	3.392729e-3	0.02317	4.379699e-3	0.01733	1.309264e-3	9.869611e-3	4.062279e-3	0.03634	3.463405e-3	0.04529
142.00000	3.479851e-3	0.02335	4.449413e-3	0.01757	1.347280e-3	9.904683e-3	4.154408e-3	0.03685	3.515212e-3	0.04570
143.00000	3.577738e-3	0.02354	4.484529e-3	0.01781	1.389980e-3	9.940326e-3	4.223591e-3	0.03736	3.556433e-3	0.04611
144.00000	3.682465e-3	0.02375	4.547633e-3	0.01807	1.423872e-3	9.973788e-3	4.318329e-3	0.03786	3.576776e-3	0.04652
145.00000	3.792022e-3	0.02398	4.542934e-3	0.01832	1.460063e-3	0.01000	4.393893e-3	0.03838	3.601066e-3	0.04694
146.00000	3.914455e-3	0.02421	4.580992e-3	0.01859	1.486123e-3	0.01004	4.513493e-3	0.03887	3.642896e-3	0.04738
147.00000	4.047352e-3	0.02442	4.595658e-3	0.01883	1.518333e-3	0.01009	4.633597e-3	0.03939	3.672119e-3	0.04783
148.00000	4.150168e-3	0.02456	4.609239e-3	0.01905	1.546669e-3	0.01015	4.731604e-3	0.03989	3.703181e-3	0.04831
149.00000	4.261535e-3	0.02471	4.587964e-3	0.01928	1.574218e-3	0.01024	4.869058e-3	0.04041	3.733988e-3	0.04879
150.00000	4.407812e-3	0.02487	4.580786e-3	0.01951	1.622593e-3	0.01035	4.987905e-3	0.04090	3.737776e-3	0.04925
151.00000	4.531754e-3	0.02507	4.607948e-3	0.01971	1.657546e-3	0.01047	5.120644e-3	0.04140	3.737484e-3	0.04970
152.00000	4.665053e-3	0.02529	4.613680e-3	0.01986	1.692963e-3	0.01059	5.248418e-3	0.04187	3.736899e-3	0.05012
153.00000	4.836380e-3	0.02553	4.684789e-3	0.02000	1.717234e-3	0.01074	5.377008e-3	0.04235	3.735230e-3	0.05054
154.00000	4.997344e-3	0.02577	4.715670e-3	0.02010	1.762998e-3	0.01089	5.522572e-3	0.04284	3.767450e-3	0.05095
155.00000	5.174003e-3	0.02602	4.822203e-3	0.02021	1.822424e-3	0.01105	5.671531e-3	0.04330	3.782408e-3	0.05136
156.00000	5.345027e-3	0.02627	4.887941e-3	0.02029	1.869309e-3	0.01122	5.804177e-3	0.04379	3.799304e-3	0.05174
157.00000	5.519171e-3	0.02656	4.983114e-3	0.02037	1.901960e-3	0.01137	5.939808e-3	0.04426	3.824361e-3	0.05212
158.00000	5.712731e-3	0.02687	5.076995e-3	0.02047	1.945579e-3	0.01153	6.121174e-3	0.04476	3.848297e-3	0.05250
159.00000	5.888484e-3	0.02721	5.213325e-3	0.02056	2.000225e-3	0.01165	6.265449e-3	0.04523	3.885145e-3	0.05285
160.00000	6.035766e-3	0.02753	5.359054e-3	0.02066	2.039695e-3	0.01177	6.429684e-3	0.04569	3.921689e-3	0.05321
161.00000	6.194216e-3	0.02783	5.508138e-3	0.02076	2.089119e-3	0.01191	6.595302e-3	0.04616	3.946514e-3	0.05368
162.00000	6.327112e-3	0.02814	5.640854e-3	0.02086	2.135217e-3	0.01205	6.779308e-3	0.04663	3.988406e-3	0.05419
163.00000	6.466749e-3	0.02845	5.738092e-3	0.02102	2.196240e-3	0.01218	6.954733e-3	0.04708	4.038702e-3	0.05470
164.00000	6.599846e-3	0.02879	5.812895e-3	0.02108	2.241874e-3	0.01231	7.124501e-3	0.04753	4.087208e-3	0.05522
165.00000	6.759201e-3	0.02912	5.866379e-3	0.02114	2.280402e-3	0.01246	7.331327e-3	0.04799	4.143376e-3	0.05577
166.00000	6.910709e-3	0.02945	5.930127e-3	0.02121	2.333510e-3	0.01261	7.543842e-3	0.04843	4.206609e-3	0.05632
167.00000	7.045517e-3	0.02975	5.982676e-3	0.02129	2.388918e-3	0.01278	7.751706e-3	0.04888	4.266310e-3	0.05687
168.00000	7.192095e-3	0.03005			2.432370e-3	0.01295	7.940992e-3	0.04931	4.330614e-3	0.05738
169.00000	7.367949e-3	0.03037			2.471292e-3	0.01314	8.165986e-3	0.04973	4.375405e-3	0.05788
170.00000	7.554869e-3	0.03073			2.487385e-3	0.01332	8.416472e-3	0.05018	4.458116e-3	0.05837
171.00000	7.747020e-3	0.03108			2.510262e-3	0.01350	8.645333e-3	0.05064	4.529303e-3	0.05876
172.00000	7.970258e-3	0.03138			2.543509e-3	0.01369	8.880102e-3	0.05118	4.603853e-3	0.05921
173.00000	8.174683e-3	0.03165			2.583086e-3	0.01389	9.120656e-3	0.05177	4.691424e-3	0.05965
174.00000	8.396109e-3	0.03189			2.618229e-3	0.01410	9.346499e-3	0.05236	4.762416e-3	0.06008
175.00000	8.511300e-3	0.03211			2.657604e-3	0.01431	9.490208e-3	0.05293	4.833360e-3	0.06051
176.00000	8.640574e-3	0.03235			2.674758e-3	0.01452	9.706841e-3	0.05373	4.904170e-3	0.06094
177.00000	8.797615e-3	0.03261			2.704728e-3	0.01472	9.919231e-3	0.05456	4.979207e-3	0.06140
178.00000	8.963811e-3	0.03285			2.729738e-3	0.01492	0.01015	0.05541	5.056606e-3	0.06187
179.00000	9.099021e-3	0.03305			2.732098e-3	0.01513	0.01034	0.05623	5.134956e-3	0.06238
180.00000	9.296907e-3	0.03323			2.761650e-3	0.01533	0.01053	0.05705	5.194109e-3	0.06289
181.00000	9.381413e-3	0.03340			2.795684e-3	0.01553	0.01071	0.05788	5.289366e-3	0.06342
182.00000	9.438053e-3	0.03365			2.808988e-3	0.01571	0.01088	0.05864	5.375512e-3	0.06387
183.00000	9.400729e-3	0.03394			2.811742e-3	0.01589	0.01109	0.05942	5.461402e-3	0.06442
184.00000	9.371253e-3	0.03423			2.817512e-3	0.01605	0.01134	0.06027	5.580681e-3	0.06499
185.00000	9.415618e-3	0.03456			2.822435e-3	0.01621	0.01161	0.06118	5.700594e-3	0.06560
186.00000	9.476282e-3	0.03495			2.856016e-3	0.01637	0.01183	0.06189	5.817071e-3	0.06622
187.00000	9.519038e-3	0.03539			2.882290e-3	0.01654	0.01204	0.06259	5.950578e-3	0.06685
188.00000	9.571452e-3	0.03589			2.923536e-3	0.01672	0.01230	0.06338	6.106084e-3	0.06751
189.00000	9.654751e-3	0.03642			2.980483e-3	0.01692	0.01258	0.06425	6.276001e-3	0.06819
190.00000	9.695194e-3	0.03696			3.052628e-3	0.01711	0.01288	0.06515	6.434455e-3	0.06888
191.00000	9.834629e-3	0.03752			3.112578e-3	0.01730	0.01316	0.06609	6.574771e-3	0.06959
192.00000	0.01004	0.03803			3.170383e-3	0.01750	0.01349	0.06705	6.738195e-3	0.07030
193.00000	0.01027	0.03855			3.242040e-3	0.01770	0.01377	0.06800	6.876648e-3	0.07093
194.00000	0.01053	0.03906			3.310752e-3	0.01789	0.01401	0.06892	7.016964e-3	0.07159
195.00000	0.01081	0.03955			3.392017e-3	0.01808	0.01427	0.06983	7.160033e-3	0.07223
196.00000	0.01094	0.03981			3.422525e-3	0.01819	0.01443	0.07032	7.295903e-3	0.07286
197.00000	0.01109	0.04004			3.463894e-3	0.01830	0.01463	0.07085	7.446463e-3	0.07350
198.00000	0.01123	0.04023			3.503765e-3	0.01839	0.01474	0.07132	7.560906e-3	0.07413
199.00000	0.01136	0.04041			3.553371e-3	0.01847	0.01488	0.07178	7.642009e-3	0.07475
200.00000									7.735647e-3	0.07540
201.00000									7.830941e-3	0.07605
202.00000									7.893833e-3	0.07672
203.00000									7.990235e-3	0.07741
204.00000									8.103058e-3	0.07810
205.00000									8.210960e-3	0.07880
206.00000									8.320031e-3	0.07962
207.00000									8.391730e-3	0.08044
208.00000									8.468424e-3	0.08137
209.00000									8.579943e-3	0.08234
210.00000									8.704692e-3	0.08331
211.00000									8.833350e-3	0.08430
212.00000									8.981670e-3	0.08530
213.00000									9.103702e-3	0.08631
214.00000									9.186510e-3	0.08735
215.00000									9.256175e-3	0.08840
216.00000									9.361945e-3	0.08936
217.00000									9.484939e-3	0.09031
218.00000									9.649508e-3	0.09119
219.00000									9.790640e-3	0.09206
220.00000									9.963980e-3	0.09294
221.00000									0.01016	0.09384
222.00000									0.01035	0.09475
223.00000									0.01059	0.09571
224.00000									0.01082	0.09665
225.00000									0.01106	0.09762
226.00000									0.01127	0.09860
227.00000									0.01148	0.09960
228.00000									0.01168	0.10059
229.00000									0.01192	0.10159
230.00000									0.01212	0.10260
231.00000									0.01232	0.10360
232.00000									0.01249	0.10473
233.00000									0.01265	0.10586
234.00000									0.01286	0.10703
235.00000									0.01307	0.10820
236.00000									0.01333	0.10935
237.00000									0.01361	0.11052
238.00000									0.01391	0.11167
239.00000									0.01412	0.11285
240.00000									0.01430	0.11403
241.00000									0.01451	0.11524
242.00000									0.01475	0.11637
243.00000									0.01501	0.11748
244.00000									0.01527	0.11853
245.00000									0.01557	0.11958
246.00000									0.01579	0.12068
247.00000									0.01603	0.12177
248.00000									0.01625	0.12288
249.00000									0.01654	0.12396
250.00000									0.01688	0.12507
251.00000									0.01722	0.12615
252.00000									0.01760	0.12723
253.00000									0.01787	0.12833
254.00000									0.01822	0.12948
255.00000									0.01855	0.13066
256.00000									0.01874	0.13121
257.00000									0.01890	0.13178
258.00000									0.01908	0.13236
259.00000									0.01927	0.13297
260.00000
261.00000
262.00000
263.00000
264.00000
265.00000
266.00000
267.00000
268.00000
269.00000
270.00000
271.00000
272.00000
273.00000
274.00000
275.00000
276.00000
277.00000
278.00000
279.00000
280.00000
281.00000
282.00000
283.00000
284.00000
285.00000
286.00000
287.00000
288.00000
289.00000
290.00000
291.00000
292.00000
293.00000
294.00000
295.00000
296.00000
297.00000
298.00000
299.00000
300.00000
[truncated: 15 more columns]

## Sheet: Vg
	Global velocity Vg deduced from the study of the explored surface area. Each [A(t),dS(t)/dt] pair was used to calculate Vg using equ. 2 of the main text, and the measured values for the division rate kdi and bacterial length lb. Vg was averaged over the timerange [0-100min]. E1=2.7 kPa E2= 6.1 kPa E3=18.5 kPa E4=65 kPa E5=84 kPa lines are replicate positions on a same hydrogel
	E1	E2	E3	E4	E5
experiment 1	0.05472		0.17172		0.56472
	0.04272				0.66972
experiment 2	0.00255292		0.06787		0.11615
	0.03947		0.09627		0.22691
experiment 3	-0.02066		0.12214	0.44344
	0.01759		0.21139	0.35929
experiment 4			0.21461	0.29621	0.38325
			0.19285	0.42133	0.44581
experiment 5			0.09475	0.35683
			0.22147	0.20995
				0.14947
experiment 6	0.0077691	0.01045
	-0.0029509	-0.01903
