# Supplementary material for: Substrate stiffness impacts early biofilm formation by modulating Pseudomonas aeruginosa twitching motility
Source: eLife. 2023 May 9;12:e81112. doi: 10.7554/eLife.81112 (PMC10259483; doi:10.7554/eLife.81112)
Supplement: Figure 3—source data 1. [file elife-81112-fig3-data1.xlsx]

## Sheet: Velocity values (raw)
PAO1 WT - Instant velocity values obtained from the tracking of all invidual bacteria, in µm/min (sampling time = 1min) E1=2.7 kPa E2= 6.5 kPa E3=18.5 kPa E4=65 kPa E5=84 kPa numbers indicate replicate positions on a given hydrogel
Experiment #1						Experiment #2						Experiment #3						Experiment #4						Experiment #5					Experiment #6				Experiment #7 - pilA mutant
E1-1	E1-2	E3-1	E3-2	E5-1	E5-2	E1-1	E1-2	E3-1	E3-2	E5-1	E5-2	E1-1	E1-2	E3-1	E3-2	E4-1	E4-2	E3-1	E3-2	E4-1	E4-2	E5-1	E5-2	E3-1	E3-2	E4-1	E4-2	E4-3	E1-1	E1-2	E2-1	E2-2	E1	E3	E4
0.02811	0.06475	0.38866	0.11024	0.35203	1.51936	0.03089	0.10757	0.02184	0.14896	0.11777	0.10757	0.02357	0.00000	0.08678	0.03744	0.07448	0.41134	2.47156	1.55829	2.44955	1.32009	3.19510	0.69463	0.08160	0.05702	0.95092	0.14599	0.18246	0.03734	0.02824	0.10721	0.17581	0.45026	0.35949	0.10702
0.08885	0.01640	0.06959	0.45196	0.24325	1.97871	0.04276	0.12491	0.05823	0.30221	0.15968	0.10343	0.03950	0.00000	0.07294	0.03950	0.08832	0.10444	1.75000	1.74740	2.20072	0.00000	2.40933	2.06155	0.06132	0.06843	0.81024	0.10949	0.15631	0.07750	0.02800	0.17936	0.31671	0.33770	0.26962	0.10702
0.37204	0.06076	0.10533	0.22984	0.26210	0.32782	0.03160	0.17315	0.03421	0.31758	0.18426	0.05178	0.01414	0.01414	0.08938	0.19222	0.08662	0.20374	1.29843	0.60653	2.41905	1.34385	2.00998	2.42085	0.08189	0.04659	0.61432	0.06585	0.07741	5.479153e-5	0.03160	0.16641	0.09593	0.21191	0.20917	0.10702
0.02886	0.05910	0.31691	0.43122	0.23928	0.33613	0.04659	0.36030	0.03662	0.33392	0.13407	0.04470	0.01744	0.00000	0.06320	0.30324	0.07742	0.29264	0.90531	0.16555	2.54865	2.03961	2.00998	2.20156	0.07802	0.03662	0.15908	0.06454	0.19133	0.11158	0.01466	0.08453	0.03585	0.28284	0.51359	0.19173
0.08679	0.03611	0.01779	0.24241	0.18426	1.48197	0.05010	0.40220	0.01850	0.28440	0.14649	1.045556e-24	0.04477	0.01746	0.01414	0.38319	0.15800	0.29536	0.23174	0.21651	1.84391	1.64720	0.44721	2.45128	0.05207	0.06585	0.44937	0.06585	0.20313	0.07064	4.604582e-8	0.06977	0.08615	0.21965	0.72622	0.14380
0.37419	0.03360	0.09094	0.06977	0.30357	2.37199	0.03421	0.43906	0.03421	0.23970	0.19050	0.02616	0.08001	0.04906	4.492822e-17	0.35710	0.12882	0.10526	0.32773	0.55440	1.12318	3.46003	0.08294	3.33732	0.06476	0.03160	0.66435	0.09570	0.12708	0.09620	3.983366e-9	0.08921	0.15800	0.10919	0.70308	0.18184
1.034010e-3	0.14525	0.30196	0.40756	0.20869	0.42157	0.03421	0.46977	0.03421	0.04838	0.10790	0.03160	0.08189	0.05105	0.04906	0.38443	0.20551	0.29355	0.31706	1.21697	0.92081	4.27736	0.27064	1.81108	0.03462	0.03421	0.80302	0.15854	0.11394	0.08006	0.02073	0.06543	0.14654	0.09081	0.65507	0.12208
0.05747	0.06701	0.05036	0.23776	0.10376	0.41092	0.02267	0.40884	0.01850	0.06320	0.03421	0.08259	0.08065	0.03491	0.06476	0.59060	0.22787	0.20604	0.28284	0.67862	0.48995	4.52291	0.33333	0.71162	0.01746	0.01850	0.73470	0.19611	0.11330	0.09045	0.02396	0.05623	0.03483	0.20000	0.36453	0.14202
0.06203	0.03286	0.12501	0.24759	0.09862	1.54733	0.04838	0.19050	9.367178e-17	0.04659	0.17017	0.09313	0.09480	0.11816	0.09993	0.24040	0.27210	0.06320	0.23174	0.44721	0.41678	3.55599	0.33333	2.00489	0.03610	0.01853	0.05475	0.11405	0.12505	0.10035	0.03160	0.17713	0.03483	0.28284	0.15122	0.10919
0.04396	0.04626	0.23372	0.04152	0.12213	2.19722	0.02267	0.44279	0.02267	0.07066	0.12388	0.08376	0.05094	0.04574	0.02469	0.16687	0.34789	0.17214	0.31706	0.41678	0.20000	3.88330	0.10367	0.80000	0.02247	0.05475	0.09778	0.10481	0.03662	0.02244	0.03483	0.30529	0.20496	0.28284	0.15122	0.20000
0.06784	0.10056	0.09196	0.01647	0.06320	0.31963	6.578071e-18	0.42969	0.03662	0.14012	0.06320	0.28230	0.05560	0.08938	0.06320	0.15095	0.51148	0.14728	0.48294	0.11729	0.82462	3.45254	0.31706	0.44721	0.03160	0.04469	0.04469	0.08065	0.14830	0.01662	0.06543	0.13751	0.19111	0.28284	0.17964	0.09081
0.04003	0.04469	0.03341	0.25402	0.07066	0.08105	0.03662	0.39813	0.03662	0.23863	0.03421	0.26058	0.03462	0.05835	0.01414	0.12760	0.55187	0.08986	0.21651	0.32773	0.44721	2.54865	1.45602	0.92081	0.01414	0.07630	0.10612	0.06585	0.17787	0.01445	0.11612	0.07066	0.07066	0.22787	0.13901	0.09081
0.04866	0.05144	0.24257	0.29048	0.03399	0.22628	0.03662	0.36951	0.04469	0.19222	0.05923	0.28333	0.03160	0.05105	0.05835	0.10674	0.67929	0.25934	0.16555	0.51042	0.51706	2.60000	1.92520	0.40851	0.08662	0.21077	0.20486	0.10791	0.18960	0.02053	0.02240	0.07923	0.20443	0.12842	0.08896	0.14202
0.08413	0.03643	0.06900	0.49655	0.08101	1.41357	0.03160	0.39317	0.01310	0.34433	0.11394	0.22567	0.04469	0.08986	0.10526	0.39791	0.75760	0.40220	0.20000	0.49692	0.90531	2.80245	3.01945	0.48995	0.06320	0.23290	0.19133	0.05475	0.21198	3.488230e-5	1.370100e-16	0.11883	0.06320	2.032700e-9	0.08896	0.21965
0.03160	0.11074	0.09784	0.01647	0.10376	1.52417	0.04470	0.15854	0.05475	0.14132	0.01310	0.24005	0.05560	0.04469	0.15800	0.26058	0.65983	0.36852	0.30620	0.48995	0.60000	2.73231	3.71957	1.34385	0.04906	0.25539	0.33348	0.07741	0.12973	0.01694	0.01466	0.20894	0.05071	0.10919	0.20052	0.14202
0.03488	0.03160	0.21791	0.20776	0.03399	0.02289	0.03160	0.09659	0.01850	0.10722	0.03160	0.09313	0.05560	0.06320	0.06557	0.34760	0.60123	0.40648	0.48995	0.28294	0.20000	2.00876	2.98878	0.11729	0.08355	0.25903	0.70556	0.07066	0.14304	0.01694	0.04469	0.29125	0.03585	0.15442	0.10343	0.20000
0.01683	0.05880	0.02744	0.08569	0.06239	0.15481	0.02267	0.08170	0.01310	0.29978	0.06454	0.09570	0.02247	0.13029	0.06469	0.33045	0.61699	0.39474	0.11706	0.20000	0.53015	3.12410	1.98703	1.78885	0.07863	0.25539	0.20851	0.05475	0.05475	0.01690	0.07963	0.39354	0.03160	0.30919	0.10450	0.29081
0.06540	0.01361	0.02616	0.48253	0.16404	0.45515	0.03160	0.07851	0.03160	0.28264	0.03160	0.11762	0.04574	0.29536	0.07066	0.06320	0.42981	0.29978	0.14347	0.14347	0.28294	0.88404	1.74359	1.41492	0.03462	0.03160	0.18825	0.04469	0.14132	0.04625	0.02240	0.36490	0.22345	1.611063e-8	0.08896	0.20000
0.03488	0.02544	0.24811	0.02081	0.19100	1.55130	0.03421	0.07066	0.03421	0.21284	0.11394	0.14304	0.06557	0.28832	0.03610	0.02469	0.23800	0.24088	0.32773	0.55972	0.58941	1.77271	1.44222	1.11929	0.08000	0.03421	0.14132	0.03661	0.10870	0.04851	0.02241	0.26419	0.06705	0.20000	0.08896	0.32791
0.27052	0.11177	0.05052	0.16108	0.20416	0.84952	0.01310	0.05340	0.01310	0.05923	0.37396	0.05475	0.04788	0.28264	0.04896	0.03160	0.29355	0.30186	0.00000	0.88682	0.57772	0.79146	1.41391	0.96932	0.03462	0.04659	0.17017	0.08759	0.15260	0.05603	0.01694	0.45028	0.04854	0.22787	0.22115	0.28284
0.04469	0.04721	0.09047	0.05663	0.21786	0.08119	0.02267	0.02616	3.340094e-17	0.03661	0.39425	0.03662	0.03462	0.28924	0.05835	0.05835	0.19013	0.19222	0.23174	1.00343	0.32773	1.16412	2.16129	1.21655	6.314949e-17	7.016610e-18	0.42160	0.04469	0.09908	0.07816	0.03485	0.35352	0.21583	0.22787	0.22115	0.29081
0.04469	0.06465	0.44082	0.48935	0.28504	0.21806	0.03421	0.04865	0.18960	0.07659	0.42160	0.03421	0.07066	0.16204	0.08355	0.05560	0.20957	0.14481	0.37487	0.80429	0.42495	1.29843	2.73402	0.63246	0.01746	0.01850	0.14765	0.07066	0.11244	0.14357	0.03576	0.15536	0.22008	0.59572	0.08896	0.32791
0.34181	0.03441	0.01220	0.02081	0.03399	0.63928	0.00000	0.01850	0.14072	0.03810	0.49624	0.11179	0.11948	0.01746	0.10674	0.03462	0.27792	0.08065	0.41678	1.07703	0.71706	3.47340	2.97763	0.27064	0.05835	0.03421	0.15800	0.06585	0.05475	0.06511	0.02242	0.33486	0.12183	0.36824	0.10250	0.30919
0.07066	0.03160	0.09685	0.13039	0.37238	1.47375	0.01850	0.03662	0.18960	0.05547	0.40594	0.03160	0.11393	0.08252	0.16953	0.10894	0.25320	0.03462	0.23174	1.42179	0.72111	5.69210	0.88358	0.66667	0.03610	0.00000	0.12514	0.03160	0.11393	0.06321	0.02241	0.41163	0.07832	0.20000	0.10250	0.14202
0.06705	0.03441	0.39843	0.06556	0.03692	0.18573	0.02267	0.05475	0.28878	0.03374	0.10722	0.09583	0.07066	0.09480	0.25340	0.09440	0.17812	0.01746	0.30620	0.69463	0.60653	7.01935	0.28968	2.47266	0.03462	0.02267	0.37981	0.10870	0.12169	0.06711	0.04854	0.29089	0.04926	0.04540	0.10250	0.36824
0.38978	0.01799	0.12315	0.03160	0.32851	0.08897	0.03160	0.07851	0.18735	0.04822	0.08170	0.11701	0.07929	0.11314	0.32534	0.21198	0.04469	0.03154	0.23174	0.33333	0.37487	6.41964	0.40851	2.14384	0.05560	0.02616	0.35254	0.09659	0.09480	2.675363e-4	0.04928	0.46307	0.05071	0.04540	0.10250	0.15442
0.03488	2.631594e-17	0.06846	0.08019	0.25352	0.07191	0.02267	0.04469	0.13597	0.03390	0.05010	0.09659	0.05560	0.12640	0.41201	0.16953	0.07066	0.03139	0.21651	0.46859	0.53005	5.01597	0.80852	2.60489	0.04469	0.01850	0.38443	0.10790	0.08759	0.01640	0.04875	0.54068	0.20566	0.33104	0.10250	0.12842
0.06540	0.01799	0.59476	5.323964e-10	0.33657	0.61692	0.02616	0.04838	0.13968	0.01326	0.04136	0.21284	0.09679	0.12719	0.32997	0.26075	0.17214	0.01411	0.23174	0.11729	0.55436	3.36772	1.45602	3.13859	0.20234	0.02267	0.38872	0.23005	0.07741	0.09628	0.04621	0.43223	0.11076	0.11097	0.09772	0.12842
0.04866	0.01361	0.10265	0.01481	0.25662	1.28347	0.03160	0.03662	0.14773	0.01823	0.03699	0.27703	0.08985	0.06707	0.24066	0.27006	0.11662	0.01406	1.51193	0.28284	0.89441	1.55959	1.77271	2.28035	0.20618	0.05178	0.41919	0.19480	0.16634	0.03505	1.598630e-5	0.50642	0.19949	0.10153	0.20000	0.21965
0.01683	0.03441	0.41859	0.07962	0.36281	0.32429	0.01850	0.01850	0.03421	0.03420	0.05340	0.22787	0.07066	0.05663	0.14693	0.18426	0.04574	0.03611	1.51193	0.28284	0.82108	1.14342	2.16220	1.89893	0.20618	0.01310	0.07066	0.15800	0.34809	0.06310	0.01466	0.37062	0.02240	0.09081	0.13500	0.28284
0.10553	0.01799	0.08529	0.65997	0.29753	0.24410	0.03421	0.03421	0.11480	0.03233	0.04838	0.30982	0.03160	0.03462	0.06329	0.06707	0.02247	0.03154	1.70880	0.21651	1.39792	0.71706	1.58563	3.12410	0.20754	0.04659	0.20515	0.26567	0.35119	0.19138	0.11391	0.15578	0.19221	6.362538e-9	0.20000	0.21965
0.04469	0.02544	0.07566	0.14590	0.32270	0.03767	0.05475	0.04838	0.03421	0.02952	0.03160	0.35004	0.03160	0.04788	0.10247	0.12882	0.05835	0.13632	1.65517	0.93814	1.07698	0.62708	2.34698	3.67178	0.23599	0.03421	0.17400	0.22680	0.26999	0.10627	0.04849	0.01551	0.05602	2.508941e-8	0.09772	0.15442
0.09179	0.03636	0.01215	1.493683e-9	0.26872	0.62194	0.00000	0.02267	0.01310	0.05808	0.08938	0.19133	0.04469	0.04574	0.20234	0.03610	0.09585	0.10246	1.65517	3.20000	0.75295	0.65372	2.67235	3.24093	0.10247	0.02267	0.11897	0.14132	0.24642	0.11168	2.499261e-5	0.06572	0.03483	0.14202	1.291451e-8	0.20000
0.03160	0.20903	0.55957	0.04919	0.27657	0.86056	0.03662	0.01850	0.02267	0.05738	0.12640	0.13407	0.04469	0.02247	0.19382	0.00000	0.06320	0.06937	0.11706	5.11823	0.83642	0.42495	2.89930	4.72017	0.09272	0.02616	0.05340	0.02616	0.21855	0.10964	0.03484	0.21208	0.02240	1.341059e-8	0.10250	0.25000
0.03488	0.04721	0.04279	0.47820	0.19477	1.01716	0.03662	0.02616	0.03160	0.05136	0.13407	0.12514	0.07066	0.01746	0.31305	0.00000	0.11394	0.08662	0.21651	6.23366	0.48993	0.48294	3.88657	5.60270	0.05835	0.01310	0.05010	0.17787	0.14765	0.07917	0.03483	0.12437	0.21893	0.20000	0.13885	0.23670
0.12640	0.25729	0.07285	0.07072	0.14888	0.13310	0.06320	0.01310	0.02267	0.08060	0.09583	0.31122	0.04469	0.04469	0.33244	0.11394	0.10526	0.04469	0.20000	8.05233	0.51706	0.21651	4.45071	5.05020	0.05560	0.03160	0.06454	0.30084	0.19561	0.12902	0.07832	0.04460	0.14132	0.20000	0.10308	0.20347
0.08938	0.03160	0.02589	0.08381	0.05973	0.03236	0.06320	0.05923	0.02616	0.05471	0.23643	0.23441	0.05105	0.04788	0.23977	0.26927	0.10381	0.06707	0.28284	8.43790	0.51706	0.30620	5.53200	4.34636	0.01746	0.01310	0.03662	0.18207	0.23863	0.06858	3.204224e-5	0.06542	0.02240	0.10919	0.11113	0.06825
0.04933	0.19202	0.36310	0.22042	0.09480	0.22498	0.03160	0.02267	0.03662	0.05171	0.20270	0.15315	0.01746	0.03610	0.07734	0.37527	0.77740	0.03160	0.28284	7.94512	0.60571	0.65372	5.87405	3.36177	0.06476	0.01853	0.09659	0.23970	0.20880	3.071219e-4	0.14176	0.05071	0.15062	0.10919	0.22712	0.10596
0.10646	0.04469	0.21019	0.31248	0.09562	0.78694	0.03662	0.02267	0.05178	0.04469	0.20355	0.14304	0.03160	0.02469	0.09480	0.65842	0.83495	0.03160	0.30620	6.93194	0.90531	1.01408	6.88887	2.95381	0.03160	3.515150e-17	0.06585	0.15800	0.23075	0.01700	0.14181	0.09049	0.24215	0.15442	0.22712	0.10596
0.09480	0.14132	0.05567	0.02082	0.08101	0.91480	0.00000	0.03421	0.03662	0.05475	0.09993	0.08376	0.04906	0.03610	0.02247	0.66757	0.82799	0.06476	0.42495	1.19510	0.40000	1.07433	6.50764	3.33732	0.27832	0.01850	0.10481	0.17698	0.10804	0.03505	0.09592	0.06434	0.13460	0.15442	0.36215	0.10919
0.14786	0.03263	0.07571	0.05089	0.22324	1.16422	0.11394	0.13029	0.04469	0.03661	0.15901	0.20892	0.06557	0.04788	0.02469	0.59525	0.73422	0.04469	0.21651	0.64633	0.28284	0.79206	7.49304	2.00172	0.26813	0.02267	0.11394	0.03160	0.12775	0.02096	0.11043	0.18031	0.03585	0.22787	0.28284	0.15442
0.12024	0.16909	0.30725	0.12508	0.07066	0.11394	0.07649	0.10948	0.12169	0.06585	0.04470	0.11762	0.06557	0.09585	0.19175	0.48917	0.75378	0.04469	0.11706	0.97033	0.30620	1.68496	5.87405	2.43351	0.25609	0.01310	0.04469	0.09659	0.01853	0.14944	0.09993	0.23393	0.05792	0.09081	0.21860	0.15442
0.05587	0.02722	0.07715	0.24919	0.27530	0.09663	0.09908	0.13950	0.04469	0.04659	0.06585	0.09993	0.03160	0.04788	0.28264	0.33908	0.27467	0.24680	0.00000	1.13137	0.56569	2.11845	6.98772	3.15966	0.24805	0.01310	0.09570	0.03421	0.12180	0.08613	0.02074	0.02241	0.03585	0.21965	0.10263	0.31063
0.20679	0.02256	0.29857	0.23671	0.03692	0.09825	0.12169	0.14823	0.09908	0.05474	0.08938	0.07066	0.02247	0.06476	0.21146	0.06329	0.17303	0.40842	0.00000	1.64924	0.51042	1.90049	6.91229	1.92747	0.25025	0.01310	0.07742	0.15331	0.14363	0.07081	0.03585	0.07834	0.02073	0.35294	0.10263	0.20000
0.03160	0.10011	0.06306	0.19197	0.25477	0.74974	0.07066	0.09483	0.05923	0.05475	0.17017	0.03160	0.04574	0.05105	0.19192	0.07220	0.03610	0.29134	0.38623	1.01980	0.21651	2.15407	6.81311	1.19965	0.03160	0.03160	0.18960	0.07066	0.15800	0.09117	0.04926	0.08602	0.11393	0.09081	0.10190	0.15442
0.10526	6.361727e-9	0.09892	0.05563	0.04469	1.23327	0.01850	0.03662	0.11394	0.03421	0.16420	0.04838	0.02469	0.06476	0.21198	0.04788	0.14728	0.15713	1.67239	1.34164	0.82108	2.50599	5.65193	2.02759	0.03610	0.03160	0.09570	0.04469	0.11680	0.10249	0.03585	0.15639	0.25337	4.202594e-8	3.491908e-8	0.00000
0.11897	0.11394	0.17215	0.24461	0.29134	0.67039	0.03160	0.04470	0.03160	0.04470	0.20892	0.03661	0.01746	0.02000	0.22434	0.06476	0.11662	0.13559	1.91992	0.48995	0.20000	1.81887	7.17441	0.81659	0.06469	0.01850	0.19228	0.19050	0.20034	0.11167	0.06543	0.11384	0.17855	0.20509	0.22674	0.09081
0.09929	0.03930	0.10666	0.07866	0.37232	7.395489e-10	0.07066	0.03421	0.03160	0.10790	0.31236	0.03662	0.04574	0.05105	0.32042	0.19652	0.07929	0.56609	1.47403	1.06751	0.11706	1.45602	6.02977	1.04555	0.03462	0.03661	0.12708	0.13029	0.13660	0.11361	0.06543	0.03484	0.20496	0.11826	0.20000	0.10919
0.10646	0.01361	0.36158	0.24751	0.48235	0.19644	0.03421	0.01310	0.08759	0.05178	0.26999	0.04469	0.02000	0.03160	0.31122	0.26999	0.02247	0.54880	1.84253	0.37487	0.44721	1.94311	3.98852	1.06751	0.05105	0.03661	0.22787	0.11244	0.17650	0.20686	0.07970	0.19035	0.03483	0.18927	0.22325	0.20000
0.36509	0.12151	0.06416	0.06320	0.37521	0.15039	0.02267	0.03421	0.01853	0.03662	0.33599	0.05340	0.08000	0.03160	0.41223	0.31723	0.07863	0.33346	1.79505	0.56569	0.10367	1.55769	2.86356	0.56569	0.05207	0.03662	0.13029	0.14765	0.34760	0.16514	0.03483	0.06347	0.27183	0.04540	0.53882	0.21965
0.10036	0.09143	0.11963	0.11487	0.67731	0.90489	0.02616	0.04469	0.03160	0.08065	0.29978	0.01850	0.02000	0.03160	0.40815	0.62332	0.09639	0.73126	0.74536	1.28062	1.00951	1.32225	3.23110	0.55440	0.05560	0.01850	0.26152	0.21077	0.36951	0.26034	0.05792	0.07976	0.10028	0.11826	0.49887	0.32225
0.06490	0.01925	0.45167	0.25121	0.41115	1.19060	0.01310	0.05178	0.03662	0.06585	0.25477	0.13029	0.03462	0.03160	0.34789	0.59957	0.06557	0.59371	0.74536	0.60571	5.08414	1.00343	2.84253	0.28284	0.06320	0.03160	0.06320	0.22197	0.41563	0.46495	0.05792	0.14288	0.42580	0.22787	0.44721	0.32225
0.03160	0.05516	0.12885	0.14253	0.78256	0.33460	0.03160	0.05340	0.04469	0.05178	0.14072	0.39595	0.08355	0.02000	0.22588	0.58075	0.03462	0.64337	0.74536	1.00000	4.85412	0.67862	1.28062	0.23174	0.04896	0.02267	0.24680	0.31758	0.34181	0.54773	0.05071	0.05071	0.33388	0.09081	0.44721	0.21965
0.27155	0.02544	0.54499	0.11538	0.55906	0.25432	0.03421	0.09908	0.06585	0.06320	0.12388	0.37543	0.15863	0.01414	0.31758	0.62084	0.03160	0.49440	1.47804	1.53019	4.58418	0.84856	2.62652	0.29484	0.09993	0.01850	0.49964	0.21815	0.23290	0.49620	0.02396	0.06865	0.02240	0.09081	0.42850	0.12842
0.02088	0.04721	0.08711	0.07943	0.93310	0.07606	0.03160	0.08259	0.03662	0.07851	0.07323	0.35240	0.06557	0.11948	0.24368	0.47997	0.16042	0.43373	1.27475	1.40281	3.27774	0.89066	2.97321	0.37487	0.11344	0.04659	0.35959	0.18393	0.17637	0.35784	0.04854	0.11612	0.15800	0.10919	0.20000	0.09081
0.05783	0.13424	0.12659	0.03599	0.50604	0.20041	0.01850	0.07066	0.01853	0.03160	0.07104	0.45625	0.08252	0.04469	0.12640	0.04788	0.05207	0.49222	0.84856	1.69706	3.75936	0.48294	3.88330	0.34649	0.13361	0.05475	0.25903	0.13407	0.16974	0.31994	0.04926	0.24679	0.05602	0.09081	0.14581	0.22787
0.06490	0.04469	0.22324	0.14981	0.76862	1.07300	0.03421	0.09908	0.03160	0.05475	0.10188	0.34468	0.04574	0.04469	0.09585	0.18902	1.779460e-16	0.46657	0.84853	2.04845	3.12363	0.55440	3.51626	0.55440	0.04896	3.069767e-17	0.47955	0.17210	0.12973	0.06369	0.06543	0.10685	0.33066	0.14202	0.21942	0.14202
0.17619	0.02256	0.13607	0.21995	0.23246	1.32556	0.05178	0.07741	0.02616	0.04659	0.10008	0.10870	0.06469	0.03462	0.15410	0.16333	0.02000	0.28346	0.96932	1.92215	2.30674	0.00000	3.87350	0.14347	0.03462	3.293710e-17	0.21815	0.17546	0.18240	0.02073	0.02240	0.21967	0.24064	0.15442	0.09887	0.22787
0.04843	0.08938	0.32808	0.17872	0.84710	0.84202	0.04469	0.03421	0.05923	0.05475	0.05923	0.14830	0.16544	0.03462	0.11226	0.33591	0.03610	0.60262	0.20000	2.40832	1.57700	0.28294	2.97813	0.52271	0.07802	0.06454	0.42625	0.09313	0.16867	0.17266	0.04626	0.15731	0.14097	0.10919	1.185508e-7	0.22787
0.09249	0.03441	0.03062	0.06785	0.22787	0.29516	0.04659	0.03160	0.01850	0.03160	0.04659	0.09993	0.01414	0.11344	0.06937	0.58380	0.13029	0.43523	0.11706	2.48763	2.11845	0.75295	2.81426	0.72111	0.15410	0.01310	0.28298	0.08259	0.14773	0.20426	0.02240	0.14466	0.21354	0.14202	0.22365	0.36824
0.08413	0.04469	0.16283	0.18174	0.81801	0.29052	0.01310	0.07066	0.38443	0.11680	0.05475	0.10329	0.12760	0.04906	0.06476	0.85653	0.02848	0.14162	0.14347	1.86393	2.71958	1.48982	2.72138	0.80852	0.17592	0.01853	0.59684	0.11394	0.14304	0.20478	0.01694	0.06543	0.19161	0.20000	0.21997	0.20000
0.03488	0.03160	0.15635	0.20607	0.10376	0.08308	0.01310	0.07066	0.35758	0.14132	0.04470	0.18207	0.03610	0.03610	0.03610	1.01492	0.06320	0.14162	0.21651	2.44131	2.66833	1.97990	1.86366	0.93447	0.02247	0.02267	0.63590	0.15646	0.06585	0.17494	0.01694	0.08201	0.01688	0.15442	0.14767	0.10919
0.06320	0.05142	0.15218	0.06449	0.65145	1.29555	0.02267	0.01850	0.39595	0.16634	0.04470	0.16420	0.03610	0.03160	0.06707	1.46781	0.04788	0.15896	0.23174	1.91658	2.86375	2.05913	1.72867	1.26800	0.08662	0.01310	0.65802	0.15908	0.20521	0.17555	0.05071	0.06485	0.02219	1.026693e-8	0.21997	0.20000
0.13536	0.08033	0.25217	0.40005	0.03160	1.29703	0.03160	0.02616	0.14132	0.18066	1.017182e-16	0.18961	0.03160	0.03160	0.03462	1.36100	0.04788	0.02469	0.28294	1.19146	3.85659	2.44131	2.20291	1.57295	0.06476	0.03421	0.33450	0.14649	0.12973	0.03578	0.06320	0.04840	0.01695	0.09081	0.20000	0.32225
0.03160	0.04959	0.09476	0.18002	0.53353	1.33996	0.11394	0.11762	0.12708	0.14765	0.05475	0.23960	0.08000	0.03610	0.03160	1.01585	0.03462	0.06476	0.20000	0.89443	3.45326	1.65368	2.31771	1.55769	0.02000	0.01310	0.18735	0.14132	0.09993	0.03251	0.05792	0.02090	0.02234	0.14202	0.10379	0.20000
0.08413	0.03160	0.03801	0.05095	0.03692	0.54310	0.08259	0.04469	0.24348	0.07085	0.05475	0.14363	0.08355	0.01746	0.04241	0.97346	0.01746	0.03160	0.00000	0.63246	2.52542	0.49692	2.60768	1.44222	0.03610	0.02267	0.12640	0.08259	0.09908	0.03187	0.07066	0.02240	0.08395	0.30466	0.21997	0.12842
0.02088	0.11361	0.12737	0.43947	0.65145	0.50561	0.18426	0.06454	0.28152	0.03421	0.07630	0.25314	0.10046	0.01746	0.04469	0.46374	0.05105	0.20829	0.00000	0.20000	1.83626	0.34649	2.25995	1.02320	0.03160	0.03421	0.44235	0.12180	0.09836	0.01698	0.07969	0.01694	0.03155	1.066160e-8	0.14767	0.16053
0.02381	0.07066	0.18147	0.03160	0.11868	0.21056	0.17315	0.08376	0.31600	0.06454	0.08170	0.34806	0.10201	0.01746	0.01746	0.23907	0.04574	0.16905	0.08294	0.58941	1.45602	0.48294	2.60778	1.07703	0.08066	0.01310	0.38053	0.06585	0.05475	0.01438	0.04469	0.02166	0.04879	0.12842	0.14767	0.15135
0.02239	0.01361	0.20250	0.39225	0.35784	1.15476	0.17971	0.09480	0.04469	0.08938	0.13029	0.44399	0.16001	0.02247	0.03462	0.22657	0.03160	0.15643	0.00000	0.60571	0.63246	0.23174	3.01846	0.51042	0.04896	0.01850	0.40263	0.21233	0.08376	0.05940	0.04469	0.06535	0.03536	0.14202	0.11168	0.37978
0.04469	0.05142	0.26678	0.23637	0.14734	1.65797	0.19611	0.06322	0.10329	0.06454	0.08170	0.57428	0.09993	0.03462	0.05105	0.16449	0.03462	0.15800	0.20000	0.34649	0.49001	0.34649	1.20185	0.11706	0.09993	0.01310	0.36070	0.23580	0.10329	0.14329	0.03160	0.04460	0.03523	0.10919	0.09650	0.11351
1.886134e-9	0.14353	0.16130	0.21359	0.26058	0.59574	0.17930	0.05923	0.03421	0.14363	0.05475	0.59810	0.10526	1.096345e-17	0.01414	0.26732	0.14455	0.26045	0.08294	0.67862	0.96932	0.75295	1.13163	0.08294	0.11360	0.01850	0.55928	0.16113	0.07066	0.09626	1.303867e-17	0.06696	0.03547	8.746133e-10	0.15568	0.14202
0.07838	0.12549	2.555940e-3	0.29051	0.11868	0.52966	0.10481	0.03662	0.06585	0.25776	0.01310	0.55187	0.09993	0.01746	0.03462	0.72954	0.09993	0.12640	0.11729	0.40013	0.77021	1.00000	1.03926	0.31706	0.09480	0.03160	0.39484	0.19005	0.05178	0.11104	0.03160	0.06696	0.05141	0.21965	0.22858	0.09081
0.07797	0.06711	0.03647	0.24676	0.37576	0.23725	0.08759	0.05475	0.06585	0.15908	0.05923	0.52971	0.11948	0.02247	0.03462	1.02436	0.13029	0.10526	0.08294	0.78385	0.67862	1.13137	2.20000	0.20000	0.10894	0.01310	0.53306	0.21048	0.01853	0.07191	0.03386	0.03585	0.02396	0.14202	0.22858	0.30919
0.09993	0.04959	0.20205	0.14165	0.30608	1.18536	0.07741	0.08274	0.07066	0.25748	0.08759	0.36987	0.10526	0.01414	0.01746	1.00488	0.13029	0.17228	0.08294	0.74536	0.68298	1.03645	1.96977	0.44721	0.10526	0.02616	0.96718	0.10791	0.06320	0.06586	0.01694	0.02396	6.201865e-18	0.27738	0.30996	0.22787
0.13029	0.04866	9.549358e-3	0.06481	0.55415	1.84306	0.08259	0.05340	0.26567	0.33591	0.07085	0.33392	0.11394	0.01414	0.01414	1.09830	0.14405	0.20234	0.11706	1.53468	0.28284	0.72656	1.09590	0.34649	0.12235	0.01853	0.62889	0.02616	0.07066	0.07066	0.03585	0.01467	0.02396	0.13826	0.14526	0.20000
0.12407	0.11921	0.18357	0.24483	0.23899	0.05366	0.09570	0.01310	0.35119	0.49964	0.07066	0.30282	0.14132	0.01746	0.03160	0.79000	0.05560	0.15800	0.20694	1.15563	1.07703	0.49692	5.93923	0.21651	0.12235	0.01853	0.67582	0.03662	0.03160	0.03177	0.03483	0.05744	0.03160	0.21902	0.21960	0.20000
0.08605	0.09480	0.13177	0.12491	0.73296	0.42643	0.04469	0.03662	0.31600	0.46977	0.09659	0.03160	0.12595	1.176722e-17	0.01414	0.72766	0.04469	0.23746	0.27592	2.07729	0.88682	0.20000	6.31281	0.00000	0.09272	0.03160	0.71029	0.04659	0.06320	0.04979	0.02396	0.02360	0.03585	0.15532	0.20041	0.21965
0.11394	0.03636	0.08093	0.18960	0.26585	0.76629	0.01310	0.04136	0.38051	0.44812	0.05178	0.22345	0.14728	0.01746	0.01414	0.43862	0.06476	0.26999	0.38623	1.45602	0.90531	0.32773	5.05020	0.33333	0.03160	0.01850	0.72879	0.11330	0.01850	0.06351	0.04626	0.03585	0.01694	0.07721	0.30426	0.36824
0.11394	0.03441	0.06213	0.22318	0.89051	0.20078	0.02267	0.03206	0.26590	0.60525	0.02616	0.17650	0.17740	2.004364e-17	0.01414	0.58321	0.08189	0.25609	0.55902	0.63246	1.47403	0.53015	5.59276	2.42670	0.03610	0.03160	0.75129	0.07066	0.01310	0.02113	0.02240	0.03585	0.04854	0.22787	0.40829	0.13649
0.16113	0.08913	0.02719	0.13659	0.29134	0.87509	0.03662	0.12775	0.38938	0.45745	0.04659	0.31738	0.12235	0.01414	0.01746	0.56049	0.09993	0.30222	0.44721	0.99024	0.32773	0.80000	7.66985	1.79432	0.04574	0.01310	0.75471	0.11897	8.992705e-17	0.03484	0.03585	0.10548	0.02240	2.152394e-9	0.07521	2.577625e-8
0.11261	0.08316	0.06904	0.13038	1.12231	1.95223	0.01850	0.15331	0.37869	0.28874	0.02267	0.45668	0.05105	0.02247	0.01746	0.73126	0.04788	0.29426	0.56569	2.03508	1.16119	1.12577	3.71706	1.60428	0.07863	0.01853	0.51441	0.07742	0.04470	2.043610e-5	0.05602	0.12730	0.01694	0.10919	0.19998	1.572954e-8
0.09628	0.01361	0.12634	0.03160	0.79817	0.05013	7.016605e-18	0.14830	0.34925	0.33190	0.03160	0.33501	0.09639	0.03610	0.01746	0.93054	0.01414	0.37387	0.90907	4.47214	0.72656	1.21655	2.88294	0.90907	0.03462	0.03421	0.36030	0.08065	0.09570	0.01465	0.01466	0.07862	0.02073	3.332081e-9	0.16276	0.13649
0.03160	0.04866	0.06319	0.16739	0.23733	0.14002	0.01850	0.14012	0.05923	0.24680	0.06714	0.15908	0.14728	0.17632	0.01746	0.97236	0.03160	0.26888	0.93498	4.77036	0.56569	0.73923	3.74375	1.13483	0.01746	0.04470	0.22680	0.05475	0.07066	0.11302	0.05792	0.10016	0.03160	0.12842	0.07777	7.732874e-9
0.05063	0.02256	0.10799	0.21401	0.15800	0.77423	0.03421	0.14549	0.05923	0.29134	0.03160	0.14072	0.14728	0.03165	0.08066	0.74493	6.619455e-17	0.25609	1.07433	5.51375	1.03645	0.79146	4.24264	1.23290	0.03462	0.03421	0.11244	0.04838	0.05178	0.02073	0.04469	0.13864	0.04469	0.14202	0.21656	0.09081
0.04469	0.11394	0.04211	0.08154	1.36544	0.16865	0.03160	0.05010	0.09128	0.20229	0.19133	0.33392	0.04788	0.04470	0.04469	0.65582	0.07929	0.20234	1.13137	0.19510	1.78860	0.48995	3.90596	1.92747	0.03610	0.01850	0.15854	0.04838	0.01310	0.05139	0.00000	0.06699	0.03585	0.21965	0.41437	0.09081
0.05063	0.01361	0.05754	0.12710	1.13565	0.74035	0.06585	0.04469	0.07741	0.12388	0.17546	0.45244	0.07066	0.04919	0.00000	0.55824	0.07734	0.25088	0.99024	0.25000	1.48982	0.23174	4.94773	1.53019	0.11662	0.05178	0.22345	0.03421	0.01310	0.05602	0.01466	0.11367	0.03585	0.35294	0.31978	0.09081
0.04843	0.06571	0.19873	0.15803	0.24398	1.86582	0.04659	0.05474	0.04659	0.08759	0.22492	0.46626	0.01746	0.01997	0.05560	0.31758	0.10526	0.16953	0.57772	0.34649	0.33798	0.51042	6.82341	1.94388	0.34539	0.04469	0.16867	0.08259	0.01850	0.06863	0.01466	0.09587	0.03585	0.20000	0.35734	0.20000
0.02088	0.05142	0.03462	2.740112e-9	0.12553	1.84791	0.04469	0.02616	0.24487	0.19228	0.26746	0.48613	0.03462	0.16114	0.07929	0.24368	0.11314	0.20653	0.55972	0.08294	0.33798	1.63946	5.68414	1.67130	0.52407	0.03662	0.17698	0.01310	0.01310	0.06543	0.06092	0.09983	0.01466	0.16113	0.41512	1.546577e-8
0.04933	0.31864	0.15004	0.16343	1.40764	0.04594	0.08759	0.02267	0.25672	0.17787	0.23539	0.56968	0.03610	4.884517e-5	0.11580	0.26109	0.07802	0.21624	0.14347	0.14347	0.51063	2.01993	5.63205	1.68147	0.64053	0.05010	0.09993	0.01310	0.01853	0.03160	0.03483	0.07654	0.04853	0.14358	0.10236	0.12842
0.10646	0.06320	0.05672	0.34757	1.37369	0.06382	0.09583	0.02616	0.37943	0.17315	0.06588	0.26778	0.03610	6.837944e-4	0.04241	0.01414	0.06329	0.30480	0.11706	0.34649	0.93286	2.04845	5.09865	1.78860	0.44404	0.07066	0.13660	0.08376	0.00000	0.02073	0.03483	0.07969	0.02396	0.20604	0.44721	0.09081
0.07797	0.07771	0.30332	0.03164	0.01909	0.64110	0.08377	0.01850	0.32910	0.18426	0.09570	0.41216	0.15800	0.01672	0.05835	0.17987	0.22122	0.27528	0.28284	1.40489	3.81947	1.89737	4.34255	1.72589	0.32298	0.08376	0.20973	0.07066	0.01310	0.03483	0.08191	0.01466	0.01694	0.07830	0.40028	0.10919
0.05783	0.28898	0.11380	0.16442	0.07674	0.27552	0.10729	0.03160	0.39274	0.18426	0.07066	0.57390	0.12251	0.01404	0.01414	0.01746	0.24033	0.17740	0.21651	2.51027	3.50154	2.03961	3.52151	0.92450	0.12882	0.07066	0.32658	0.06454	0.01310	0.03483	0.12094	0.02239	0.05071	0.06421	0.32026	0.14202
0.03488	0.30211	0.06486	0.16463	1.37474	0.47503	0.11179	0.04469	0.07066	0.16420	0.01850	0.67923	0.15800	0.03606	0.09993	0.08938	0.44911	0.11314	0.00000	0.93447	2.89679	0.90907	4.07323	1.12014	0.09639	0.08065	0.48361	0.08187	0.04470	0.02396	0.12267	0.02073	0.03585	0.09081	0.86023	0.10919
0.09594	0.03160	0.23962	0.01567	1.30323	2.14382	0.08259	0.03160	0.08759	0.03421	0.06585	0.46198	0.20234	0.09812	0.09480	0.12122	0.69592	0.29139	0.08294	0.84853	2.80713	0.86054	4.20476	0.96932	0.19943	0.05474	0.63200	0.08565	0.04470	0.02396	0.17995	1.247330e-17	0.03483	0.12842	0.94765	0.14202
0.06490	0.06465	0.19185	0.14901	0.08815	1.46331	0.09662	0.06320	0.07066	0.11179	0.02267	0.54090	0.20234	0.08441	0.13555	0.04788	0.52535	0.03160	0.08294	0.44721	2.10207	1.12318	4.89228	0.65372	0.03462	0.07066	0.56528	0.12505	0.06070	2.038378e-6	0.19035	0.03585	0.02240	0.21965	0.76328	0.10919
0.03580	0.14791	0.36786	0.16106	0.11603	0.02944	0.11754	0.14773	0.04469	0.06320	0.07066	0.21048	0.10674	0.07674	0.20424	0.11344	0.74026	0.19125	0.11706	1.01065	1.80191	0.40851	5.25527	0.28284	0.02247	0.04470	0.61201	0.18956	0.17210	0.05141	0.10548	0.01694	0.03483	0.14202	0.82319	0.09081
0.05128	0.34903	0.06205	0.02298	1.31852	0.09625	0.13594	0.16867	0.25772	0.07066	0.02267	0.07066	0.09993	0.07723	0.06476	0.14693	0.81300	0.38632	0.08294	3.13993	1.57295	0.48995	4.80158	0.69290	0.07802	0.03662	0.57610	0.15315	0.19090	0.04853	0.08615	0.03160	0.05602	0.15442	0.80626	0.09081
0.06705	0.08712	0.03246	0.07968	1.23078	0.20571	0.26999	0.18240	0.15800	1.554183e-16	0.08759	0.08759	0.06476	0.08236	0.25320	0.10526	0.72996	0.57764	0.00000	2.35702	2.26317	0.70711	4.80158	0.93814	0.06476	0.03421	0.56968	0.20973	0.21233	0.01466	0.13460	0.06488	0.10650	0.10919	0.12304	1.546577e-8
0.04933	0.08316	0.27845	0.01475	0.06443	0.21602	0.19480	0.20758	0.17787	0.05475	0.12973	0.07741	0.04469	0.06476	0.19150	0.15800	0.46418	0.22657	0.11706	0.39633	2.05913	0.62479	2.55032	1.07703	0.08000	0.01310	0.46977	0.07742	0.21198	0.08017	0.02073	0.05071	0.12725	0.14202	0.04895	0.10919
0.06320	0.16652	0.11255	0.11110	0.10376	0.65138	0.19002	0.20892	0.18426	0.12169	0.11394	0.07066	0.06707	0.06320	0.22472	0.17876	0.68434	0.44404	0.00000	1.34164	2.34136	2.48739	1.87451	1.05279	0.46374	0.02267	0.43438	0.04469	0.23005	0.08014	0.07832	0.07969	0.08615	0.10919	0.13040	0.10919
0.06705	0.36147	0.26478	0.11534	1.08456	1.62842	0.25477	0.10722	0.11680	0.08259	0.13407	0.10791	0.04896	0.07066	0.23866	0.10526	0.60331	0.36722	0.20000	2.11845	2.30715	2.40079	1.63946	1.00050	0.44670	0.03160	0.33747	0.04659	0.13216	0.02240	0.04854	0.03585	0.14108	0.09081	0.14615	0.00000
0.03580	0.01361	0.21489	0.09614	1.01114	1.55439	0.22197	0.09313	0.15808	0.06320	0.05475	0.08274	0.05207	0.07066	0.20706	0.11175	0.50267	0.42513	0.11729	1.71748	1.97622	1.51933	1.41907	1.16412	0.52307	0.27495	0.28878	0.09908	0.14132	0.08938	0.04626	0.04859	0.03385	0.22787	0.15310	0.20000
0.09993	0.08033	0.05977	0.04469	0.22345	0.32285	0.02616	0.06454	0.12514	0.07323	0.03662	0.08259	0.05207	0.15800	0.07734	0.13555	0.56781	0.07066	0.37487	5.07718	1.08611	1.72047	1.29353	0.56569	0.50782	0.27817	0.31647	0.05923	0.15050	0.04469	0.08403	0.06488	0.06317	0.14202	0.26132	0.10919
0.05063	0.29855	0.13927	0.07066	0.12454	0.02096	0.06585	0.03421	9.657800e-17	0.09313	0.04838	0.05340	0.01746	0.12882	0.08355	0.23601	0.49361	0.17017	0.40013	1.51511	1.02320	0.82462	1.18652	0.44721	0.50731	0.24348	0.44408	0.09313	0.14765	0.03483	0.11394	0.07066	0.04626	0.22787	0.16297	5.807065e-9
0.05783	0.01361	0.05772	0.11274	0.72393	0.32806	0.01310	0.02267	0.01853	0.07066	0.04469	0.17698	0.03462	0.10674	0.19222	0.38701	0.44805	0.11344	0.61244	2.35850	0.55972	1.07703	0.61131	0.56569	0.16544	0.23888	0.50795	0.07851	0.12505	0.04469	0.09993	0.03585	0.02239	0.09081	0.17945	0.12842
0.12640	0.07066	0.14175	0.03469	0.67183	0.21165	0.05010	0.03421	0.03662	0.11394	0.11394	0.19005	0.02469	0.07066	0.26045	0.50953	0.42697	0.19504	1.04513	2.35403	0.51042	2.97026	0.40000	1.21655	0.17272	0.23689	0.59488	0.03662	0.20234	0.10028	0.03160	0.03585	0.04853	0.09081	2.416672e-9	0.10919
0.07066	0.07016	0.05710	0.11396	0.28195	1.24804	0.03165	0.04838	0.03421	0.09993	0.13029	0.17519	0.08355	0.08662	0.24066	0.36030	0.64132	0.13029	0.19510	3.28024	0.82462	2.73550	0.55440	2.40000	0.19222	0.15050	0.66114	0.03662	0.11554	0.04626	0.01694	0.01694	0.05602	0.10958	0.10197	0.09081
0.03580	0.07066	0.05577	0.04912	0.21478	1.20244	0.10481	0.04469	0.08938	0.06585	0.14304	0.21748	0.13029	0.06476	0.23977	0.35330	0.63453	0.39547	0.14633	2.40428	0.72656	3.01882	1.68147	2.89633	0.32420	0.15260	0.49462	0.08759	0.33392	0.06543	1.498909e-16	0.06320	0.06863	0.31925	0.24080	1.546575e-8
0.10957	0.06320	0.16349	0.13030	0.57112	0.27500	0.08938	0.03662	0.07630	0.07059	0.09993	0.11394	0.14132	0.04788	0.10526	0.36144	0.80359	0.42160	0.16555	2.21547	1.74609	1.16119	1.30666	3.59087	0.22345	0.06585	0.40839	0.21438	0.31224	0.06543	0.11173	0.04926	0.07971	0.41231	0.22259	0.14202
0.03580	0.02544	0.05122	0.14337	0.66165	0.07598	0.08065	0.03160	0.08065	0.18067	0.15854	0.03160	0.12251	0.03610	0.04574	0.19192	0.53841	0.42981	0.31706	2.51495	1.12318	1.89737	1.44222	0.38623	0.33591	0.05923	0.23863	0.19729	0.08376	0.06543	0.09056	0.01466	0.03162	0.20021	0.22495	0.32785
0.05128	0.03160	0.12654	0.10057	0.31758	0.64424	0.05475	0.02267	0.22867	0.13216	0.18960	0.05923	0.07929	0.01414	0.02247	0.16113	0.43539	0.38443	0.20000	2.40832	1.12577	3.81490	1.11624	0.51063	0.17828	0.01850	0.21815	0.36852	0.12169	0.03483	0.02073	0.01466	0.01454	0.27642	0.31742	0.55895
0.10553	0.11713	0.03477	0.29820	0.49462	0.19076	0.23398	0.05475	0.19480	0.08929	0.05781	0.06454	0.03462	0.03610	0.20111	0.26437	0.32613	0.11033	0.20000	3.43598	1.00683	2.34136	1.23804	0.48995	0.15410	0.01850	0.14132	0.48663	0.23430	0.01694	0.03483	0.01466	0.03484	0.21965	0.28297	0.69097
0.12088	0.03636	0.09643	0.15902	0.70903	0.93852	0.30414	0.03662	0.19611	0.14494	0.06322	0.01853	0.06557	0.04469	0.19382	0.28475	0.15095	0.03610	0.14347	3.16954	0.80852	2.85044	0.21651	0.56569	0.14132	0.04470	0.17017	0.49964	0.11244	0.00000	0.02240	0.06543	0.03157	0.21191	0.14144	0.21404
0.06557	0.05516	0.09015	0.39725	0.28335	0.89712	0.19986	0.08494	0.18960	0.14320	0.04659	0.03421	0.04906	0.03160	0.22345	0.28860	0.20829	0.01414	0.00000	3.37828	0.79146	0.54622	0.95972	0.60571	0.20234	0.04469	0.08259	0.40020	0.13407	0.00000	0.04853	0.06543	0.03485	0.30218	0.09805	0.16053
0.09355	0.04866	0.23403	0.24535	0.55498	0.22036	0.34809	0.06585	0.15854	0.04659	0.39060	0.05474	0.03160	0.08355	0.25192	0.26999	0.39248	0.05207	0.11706	1.34164	1.00000	4.77261	1.52157	0.71706	0.08355	0.03421	0.12640	0.43221	0.22787	0.00000	0.09370	0.08938	0.04626	0.20429	0.20025	0.21965
0.06850	0.02256	0.28832	0.11206	0.97051	0.16293	0.30414	0.06233	0.08938	0.05470	0.22345	0.18961	0.04469	0.02000	0.28640	0.25280	0.49001	0.01746	0.08294	3.09179	1.05279	1.99965	2.69943	0.55440	0.20234	0.03160	0.20973	0.30290	0.22159	0.02240	0.05141	0.10028	0.03572	0.19190	0.31843	0.21965
0.09480	0.01799	0.01238	0.41595	0.23504	0.79433	0.06714	0.06354	0.12388	0.06590	0.15854	0.32534	0.03160	0.05835	0.36144	0.20477	0.62724	0.04574	0.23174	3.58942	1.33216	2.38003	4.82554	0.55440	0.28640	0.03160	0.22087	0.03421	0.15908	0.01466	0.03585	0.11334	0.03484	0.25146	0.09836	0.09081
0.09480	0.04521	0.06016	0.20567	0.52174	0.38140	0.07066	0.06341	0.08376	0.04654	0.06585	0.28264	0.04896	0.07802	0.21199	0.20618	0.60372	0.10900	0.51042	3.29747	2.29168	4.84371	5.10093	0.52367	0.27141	0.01850	0.14765	0.05010	0.13029	0.01466	0.09175	0.14480	0.04925	0.11393	0.20000	0.14202
0.05063	0.03160	0.03500	0.12790	1.48520	0.79800	0.05340	1.977653e-4	0.04659	0.05327	0.09570	0.23222	0.04469	0.15604	0.38290	0.19040	0.62168	0.17812	1.65517	3.21490	1.82210	5.32082	4.72017	0.44839	0.35184	0.03160	0.14363	0.25776	0.22345	0.01466	0.04469	0.10028	0.05070	0.30919	0.34544	0.10919
0.01477	0.01361	0.27841	0.49989	0.12702	0.75504	0.10481	0.04665	0.04838	0.02264	0.11244	0.17787	0.03610	0.09585	0.30203	0.19040	0.34629	0.17445	1.98703	6.73696	1.12318	6.28403	6.32456	0.34649	0.22688	0.01850	0.16113	0.24348	0.21855	0.03160	0.06320	0.09993	0.02395	0.22787	0.34562	0.00000
0.11394	0.02544	0.18128	0.22349	0.51225	0.23454	0.03421	0.01868	0.01310	0.06457	0.08759	0.12169	0.03160	0.14819	0.37494	0.09993	0.33425	0.22264	2.33238	5.88218	1.08611	3.28502	5.94643	0.49692	0.19132	0.03661	0.11244	0.30942	0.13968	0.02073	0.01466	0.11302	0.06542	0.15532	0.49863	0.09081
0.04933	0.03441	0.08173	0.10649	1.88355	0.12790	0.06454	0.02293	0.14132	0.05338	0.13029	0.05474	6.297871e-17	0.11217	0.43862	0.14125	0.12760	0.16449	1.86340	2.81789	1.05186	1.91886	4.05031	0.42495	0.13546	0.02616	0.06320	0.15800	0.21709	0.00000	0.02073	0.08403	0.03483	0.30273	0.28284	0.21965
0.16074	0.01799	0.16949	0.24527	0.05069	0.05152	0.11405	0.04496	0.03160	0.13404	0.13029	0.13029	0.03462	0.03462	0.66756	0.11360	0.14819	0.16905	2.89325	1.26491	1.52315	1.74022	4.48978	0.41678	0.19142	0.06322	0.07741	0.23005	0.19228	0.01466	0.03585	0.08191	0.03159	0.20563	0.22227	1.546577e-8
0.09071	0.14401	0.07589	0.14053	0.32093	0.97804	0.07066	0.03674	0.07851	0.13029	0.15808	0.19222	0.03462	0.07802	0.72040	0.11662	0.11406	0.14780	2.60864	1.23290	1.41421	0.52271	5.04777	0.61131	0.15782	0.03160	0.27703	0.21198	0.08170	0.01466	0.05071	0.07832	0.03586	0.07721	0.15543	0.09081
2.924626e-3	0.01799	0.19909	0.04987	1.50859	0.74731	0.09589	0.04470	0.01850	0.13212	0.07066	0.22164	0.02469	0.09159	0.53720	0.13442	0.17876	0.13559	1.72982	1.27475	1.54099	0.14347	4.68188	0.48294	0.09988	6.201865e-18	0.50714	0.20270	0.08759	0.03160	0.12267	0.05792	0.01467	0.07721	0.15543	0.09081
0.02953	0.01799	0.04928	0.15817	0.15800	0.62866	0.15345	0.01326	0.02267	0.17928	0.07630	0.23689	0.04469	0.08938	0.65314	0.14162	0.15647	0.17017	2.29081	1.81541	1.54099	0.74443	4.02469	0.31706	0.09948	0.03160	0.40663	0.23005	0.14823	0.05071	0.12640	0.09480	0.03160	0.10919	0.10368	0.12842
0.03488	0.03441	0.03849	0.33599	0.32366	0.61123	0.03183	0.03664	0.09659	0.20877	0.01310	0.36987	0.06557	0.09161	0.63594	0.16544	0.21627	0.39547	2.82516	0.82820	1.21697	1.21655	4.67790	0.60653	0.09998	0.06585	0.36202	0.22378	0.14490	0.03483	0.07066	0.05071	0.04626	0.09081	1.030827e-8	0.16053
0.08605	0.01361	0.22506	0.31305	2.02351	0.06813	0.07630	0.03657	0.13950	0.20892	0.02616	0.52971	0.06320	0.09988	0.70521	0.20372	0.24680	0.53929	1.88396	0.85367	0.90907	2.00998	4.61648	0.71706	0.05552	0.10481	0.32222	0.23005	0.17161	0.03160	0.05792	0.06543	0.03484	0.36824	0.10368	3.734511e-8
2.068030e-3	0.06571	0.09409	0.49682	0.17365	0.01529	0.06367	0.03421	0.02267	0.19480	0.05010	0.65498	0.04788	0.11394	0.49535	0.27183	0.28924	0.50432	2.67235	0.68294	0.72111	2.37384	0.23911	0.82462	0.07093	0.08065	0.14132	0.26623	0.13534	0.02240	0.05141	0.06320	0.18960	0.44721	0.10368	0.27298
0.04843	2.403997e-9	0.03494	0.22376	0.27183	0.16455	0.13363	0.01312	0.09993	0.19986	0.02267	0.52875	0.39595	0.03160	0.63985	0.28959	0.46984	0.65145	3.90159	1.12577	0.49001	2.72230	0.27064	0.93862	0.03594	0.03661	0.06320	0.32991	0.05010	0.01694	0.10948	0.13432	0.12753	1.35272	9.451064e-9	0.20474
0.01696	0.04721	0.11850	0.60403	2.20748	0.99594	0.27490	0.02267	0.02616	0.03160	0.04838	0.36030	0.37423	0.03610	0.43964	0.21198	0.06468	0.75616	4.25206	1.07433	0.30620	3.49857	0.11706	1.18652	0.07742	0.07066	0.16867	0.27269	0.17119	0.01694	0.10548	0.05602	0.14678	1.63285	2.063866e-8	0.05460
0.17767	0.05516	0.05282	0.15809	0.15648	0.66474	0.12157	0.04469	0.06320	0.03421	0.09313	0.31654	0.36852	0.07802	0.25320	0.17017	0.04893	0.62037	4.72017	1.26800	0.11729	2.44773	0.40000	0.69290	0.05218	0.04838	0.06454	0.37194	0.04838	0.03160	0.03160	0.17855	0.11302	1.71589	0.10368	0.05460
0.10553	2.318462e-9	0.02671	0.12767	0.45583	0.94146	0.22421	0.05010	0.14304	0.09659	0.04469	0.34788	0.34071	0.07066	0.05835	0.21624	0.14886	0.37527	3.33146	1.21095	0.21651	1.38321	0.58941	0.66337	0.04424	0.03421	0.20234	0.33549	0.09908	0.03160	0.01694	0.22426	0.12838	1.54264	0.09632	0.14202
0.29105	0.03441	0.21179	0.47210	1.71049	0.44263	0.27471	0.01853	0.08170	0.08065	0.05475	0.31224	0.36899	0.08938	0.15863	0.14728	0.16905	0.37494	3.13689	1.09590	0.31706	1.69478	0.79206	0.72138	0.02247	0.02616	0.43072	0.24064	0.09908	0.07923	0.02240	0.18170	0.04626	1.49342	0.14297	0.15442
0.06850	0.07066	0.13087	0.05822	0.08447	0.04132	0.26807	0.01850	0.07742	0.11244	0.01310	0.27487	0.03610	0.06707	0.46936	0.10674	0.31380	0.16042	2.55690	0.20000	0.32773	1.00683	1.00050	1.60215	0.03593	0.01850	0.34309	0.15806	0.16113	0.03386	0.03160	0.08190	0.04926	0.72111	0.09883	0.14202
0.21198	0.05142	0.06707	0.39525	0.42981	0.06973	0.24681	0.04469	0.05010	0.14549	0.04470	0.19986	0.04469	0.07066	0.47425	0.14661	0.06476	0.05835	2.18913	0.67862	0.23174	0.40851	1.01980	1.89353	0.02008	0.02267	0.42474	0.10971	0.02616	0.01466	0.01466	0.07969	0.04626	0.44721	0.10884	0.09081
0.11394	0.01361	0.26247	0.07860	1.41366	0.79778	0.20002	0.01853	0.02616	0.19005	0.02267	0.21198	0.05105	0.07220	0.32534	0.14886	0.04469	0.09159	1.76777	0.00000	0.52271	0.71706	1.49636	1.60215	0.06476	0.03421	0.51967	0.01310	0.05010	0.03483	0.01466	0.03160	0.03160	0.20305	0.10884	0.00000
0.27148	0.09514	0.01958	0.42771	0.13388	0.42992	0.12674	0.04469	0.03421	0.25477	0.04469	0.12640	0.01414	0.08066	0.29049	0.09585	0.03160	0.01414	4.03007	0.00000	0.74443	1.86366	1.53594	1.20570	0.07802	0.01853	0.43964	0.04659	0.21077	0.03483	0.01466	0.07905	0.01694	0.21223	0.22198	0.14202
0.09993	0.04469	0.05927	0.19007	0.20669	1.16880	0.09544	0.05340	0.03662	0.16619	0.03662	0.25903	0.02247	0.08189	0.39360	0.06557	0.03610	0.15896	0.23911	0.11706	0.52271	0.67862	0.72111	1.52155	0.06469	0.02616	0.43068	0.02615	0.21198	0.03585	0.01694	0.07786	0.04853	0.25603	0.14460	0.15442
0.15869	0.04866	0.22643	0.34974	2.02474	0.46744	0.07072	0.01850	0.01850	0.19442	0.10722	0.09659	0.02247	0.08252	0.39373	0.14819	0.09585	0.28203	0.17933	0.11706	0.60571	1.03926	0.90907	0.00000	0.03160	0.03421	0.23960	0.01847	0.17400	0.03483	0.02240	0.14209	0.01466	0.27673	0.09265	0.14202
0.07962	0.10841	0.15837	0.06557	0.08815	0.01291	0.15811	0.08376	0.04469	0.15315	0.09836	0.15315	0.01746	0.06320	0.34766	0.33377	0.16113	0.30516	0.11706	0.51706	0.21651	1.74022	0.89443	0.20000	0.20829	0.01850	0.07066	2.482296e-17	0.11480	0.02073	0.19572	0.13042	0.03160	0.05808	0.09241	1.546576e-8
0.24628	0.03636	0.18833	0.18432	0.21198	0.07460	0.05306	0.08065	0.01850	0.08844	0.23643	0.11104	3.922405e-18	0.06707	0.24680	0.31758	0.21198	0.29978	0.58941	0.44721	0.23174	0.96932	0.61131	0.21651	0.20604	0.01310	0.39576	0.02267	0.22835	9.219735e-17	0.11394	0.08722	0.01694	0.07101	0.21896	1.424973e-8
0.03488	0.04866	0.19122	0.17690	1.54969	0.54322	0.02285	0.01850	0.03662	0.04838	0.34249	0.16824	0.02247	0.01746	0.09440	0.09987	0.30840	0.29134	0.44721	0.40000	0.32773	0.58941	0.48995	0.16555	0.15713	0.02267	0.31677	0.01853	0.04470	9.298662e-17	0.15800	0.09644	0.01694	0.21965	0.20000	0.09081
0.14646	0.12549	0.02076	0.34362	0.13948	0.64700	0.07053	0.01853	0.07741	0.12775	0.16577	0.14363	0.02247	0.02469	0.07734	0.17900	0.20706	0.27432	0.63246	1.32741	0.44721	2.05913	1.75086	0.11706	0.19382	0.01310	0.24066	0.01310	0.21709	0.04469	0.29549	0.02077	0.06763	0.10919	0.13826	0.20000
0.04866	0.03441	0.07048	0.15885	0.61145	1.34868	5.613288e-17	0.03421	0.05923	0.12180	0.12775	0.09583	0.01746	0.03462	0.05207	0.14819	0.09993	0.26058	1.80000	2.39471	0.40000	2.16401	2.03961	0.11706	0.24066	0.05475	0.44408	0.04471	0.21198	0.01694	0.42799	0.04861	0.06552	0.14202	0.28331	0.22787
0.37920	0.03636	0.23926	0.06320	1.16442	0.33582	0.10329	0.09908	0.03662	0.27106	0.06454	0.09128	0.02000	0.04896	0.04896	0.08000	0.06557	0.45533	1.80000	1.93203	0.11706	1.48982	2.81789	0.61131	0.04469	0.01850	0.56968	0.01310	0.07742	0.03483	0.32991	0.01503	0.05070	0.10919	0.21817	0.21965
0.03160	0.11921	0.15352	0.26921	0.01251	0.10044	0.08170	0.03421	0.08938	0.34044	0.10722	0.05474	0.02000	0.03160	0.04906	0.06707	0.08355	0.53983	1.41489	1.56205	0.30620	1.28062	3.60096	0.40000	0.01414	0.03160	0.34767	0.03661	0.07085	0.01714	0.28061	0.03147	0.08017	0.09160	0.09307	0.14202
0.05783	0.04521	0.18762	0.12377	0.77599	0.13811	0.10481	0.03421	0.04470	0.34042	0.26443	0.12640	0.03462	0.02247	0.07066	0.12122	0.08986	0.52976	2.46025	2.34637	0.00000	0.66337	4.00171	0.53015	0.05560	0.02616	0.37981	6.933896e-18	0.07066	0.02382	0.03160	0.04889	0.06705	0.12557	0.10906	0.20000
0.13029	0.04469	0.10212	0.04472	1.38500	0.38527	0.04470	0.07066	0.03662	0.15890	0.05340	0.07851	0.02469	0.01414	0.10247	0.03462	0.04896	0.35084	3.02624	1.90049	0.16555	0.44721	3.21809	0.71278	0.02469	0.03421	0.31122	3.635626e-5	0.08759	0.07823	0.05602	0.05157	0.06543	0.10726	0.21133	0.09081
0.24251	0.08938	0.04399	0.10575	0.03692	0.66191	0.06322	0.03160	0.10791	0.08253	0.06320	0.08938	0.03610	0.05835	0.06476	0.04469	0.14405	0.32538	0.77021	0.51042	0.21651	0.37487	3.38554	0.91774	0.04906	0.03421	0.30562	0.01851	0.10329	0.09646	0.09593	0.05809	0.05141	0.10719	5.380671e-9	0.14202
0.10198	0.03598	0.10410	0.13036	1.65750	0.96772	0.08170	0.04469	0.05475	0.01822	0.03160	0.06714	0.05105	0.06476	0.09639	0.01414	0.02247	0.27519	1.23052	1.07703	0.28294	0.29484	2.68742	0.08294	0.03160	0.01853	0.33062	0.03152	0.02267	0.08418	0.44264	0.04962	0.03483	0.14326	6.785544e-9	0.21965
0.15787	0.04866	0.28728	0.07992	1.38130	0.15280	0.08759	0.05802	0.05475	0.09529	0.03160	0.03421	0.05105	0.07066	0.06320	0.02000	0.05105	0.20979	2.16333	1.34164	0.25000	0.23174	4.69043	0.40000	0.03610	0.00000	0.20687	0.01297	0.13407	0.13585	0.20654	0.03585	0.03160	0.12857	0.11323	0.14202
0.01683	0.08033	0.08002	0.03471	0.14673	0.27715	0.07066	0.02616	0.06714	0.07739	0.08065	0.05475	0.05835	0.06937	0.07863	0.06707	0.03462	0.18937	1.75668	0.82108	0.47156	0.11706	5.36534	0.23163	0.08355	0.03421	0.19611	0.05173	0.12514	0.25830	0.29582	0.03586	0.05071	0.08899	0.11323	0.10919
0.13029	0.04542	0.18239	0.33997	2.20436	0.13307	0.04469	0.01310	0.05340	0.10323	0.03421	0.09570	0.03462	0.04574	0.04469	0.14386	0.03610	0.19223	1.35684	0.33798	0.33333	0.11706	4.91966	0.25088	0.05835	0.01310	0.26512	0.03664	0.16867	0.13436	0.50312	0.07066	0.07066	0.19996	0.11295	0.14202
0.06540	0.05516	0.22652	0.13036	1.37043	0.26383	0.04469	0.08274	0.01310	0.07081	0.04470	0.09570	0.04574	0.09639	0.03160	0.17987	0.09480	0.18093	2.26167	0.68294	0.40966	0.16555	3.49734	0.92445	0.06476	0.04469	0.38443	0.01311	0.26964	0.07098	0.40733	0.01466	0.04926	1.12118	2.458488e-8	0.22787
0.35624	0.02544	0.02433	0.01627	0.09993	0.68282	0.09993	0.09659	0.01310	0.01853	0.03421	0.14304	0.00000	0.06937	0.08662	0.16113	0.18649	0.12640	2.23607	1.48755	0.21651	0.11706	3.33218	4.02768	0.03610	0.03662	0.36030	0.01849	0.20313	0.06554	0.49153	0.03586	0.05602	1.29592	1.155892e-8	0.10919
0.08413	0.06465	0.07724	0.13040	2.08779	0.66959	0.07071	0.08170	0.03421	0.01858	0.01850	0.19561	0.01414	0.08355	0.05560	0.04469	0.24074	0.03160	1.79505	2.25239	0.65372	0.08294	2.00000	4.53797	0.04574	0.04470	0.36396	0.05163	0.22345	0.16295	0.25477	0.02240	0.05141	1.38073	0.11323	0.31063
0.04469	0.09293	0.21627	0.49374	1.79676	0.04674	0.16619	0.06454	0.01850	0.06320	0.01853	0.21855	0.01414	0.05835	0.04788	0.09480	0.22345	0.11245	0.52844	2.47542	0.40851	0.08294	0.53015	4.59917	0.05105	0.02267	0.23888	0.03415	0.19228	0.07059	0.27482	0.02240	0.04469	1.26006	0.08892	0.22787
0.03160	0.08316	0.08722	0.06320	0.09670	0.50494	0.15901	0.08065	0.01850	0.07741	0.03160	0.19611	0.01414	0.03160	9.209300e-17	0.11662	0.33591	0.04555	0.25000	0.23911	0.28284	0.21651	0.80000	4.55376	0.02469	0.05010	0.23467	0.04654	0.26941	0.02241	0.30108	0.07969	0.08403	1.22037	0.08892	0.10919
0.15889	0.08232	0.05220	0.04921	1.89903	0.08039	0.14132	0.08065	0.05923	0.06714	0.02267	0.14132	0.02247	0.03462	0.02247	0.15800	0.30168	0.02123	0.20000	0.00000	1.01980	0.37487	1.34385	4.58736	0.03610	0.04469	0.13597	0.04656	0.07742	0.18912	0.09993	0.01466	0.03585	0.15442	0.14120	1.749219e-9
0.15800	0.17707	0.21644	0.05016	2.20069	0.14541	0.07066	0.03160	0.01850	0.13534	0.07066	0.11480	0.03160	0.01746	0.04469	0.09585	0.14819	0.09480	0.92450	0.00000	1.44729	0.14347	1.93429	4.00500	0.05835	0.05178	0.10948	0.04657	0.10722	0.06542	0.24782	0.03585	0.03483	0.30466	0.14120	0.14202
0.10036	0.08131	0.04649	0.46503	0.17988	0.76647	0.10467	0.02267	0.01310	0.13029	2.997497e-17	0.16619	0.01746	0.07066	0.04469	0.01414	0.12235	0.15205	0.32773	0.14347	0.84853	0.08294	2.00901	3.76518	0.05835	0.02267	0.13968	0.05474	0.17017	0.09978	0.19222	0.02240	0.01466	0.20000	0.24082	1.933221e-8
0.05611	0.03441	0.06817	0.19149	1.33035	0.33983	0.04470	0.01850	0.03421	0.06714	0.07851	0.20234	0.02469	0.01746	0.10894	0.07929	0.05835	0.17485	0.37487	0.08294	1.31598	0.23174	1.48982	3.80000	0.05105	0.01310	0.28009	0.02267	0.28903	0.01471	0.17185	0.06543	0.01466	0.21965	9.197527e-9	0.15135
0.27694	0.09993	0.14900	0.11232	2.21546	0.08290	0.05340	3.013175e-17	0.27734	0.09570	1.232791e-16	0.23290	0.03160	0.01414	0.04574	0.08252	0.09585	0.34912	1.20570	0.34649	1.75464	0.11706	1.78885	3.82049	0.04788	5.616031e-18	0.24177	0.01847	0.37650	0.02408	0.10548	0.10206	0.02396	0.28284	0.11295	0.27298
0.03160	0.18863	0.03977	0.06322	0.35330	0.41573	0.05923	0.02616	0.17017	0.11251	0.03160	0.12514	0.01414	0.04469	0.12760	0.07734	0.06320	0.12972	0.97033	0.23174	0.68085	0.08294	2.30485	3.27907	0.06557	5.616032e-18	0.31224	0.05007	0.36396	0.16101	0.03160	0.06542	0.03483	0.09081	2.414017e-9	0.20474
0.04933	0.05880	0.16329	0.42985	1.27526	0.02477	0.07742	0.01850	0.34806	0.11330	0.09327	0.08844	0.03324	0.01746	0.10894	0.04469	0.14819	0.18434	0.62708	0.33798	0.27064	0.20000	2.30356	4.90954	0.02247	0.01850	0.33591	0.03662	0.38443	0.03482	0.07786	0.08938	0.03585	0.12842	0.11295	0.20474
0.11261	0.04521	0.06258	0.23659	2.14235	0.07382	0.03662	0.01850	0.40642	0.12770	0.20034	0.10722	0.04896	0.03160	0.09585	0.03610	0.06320	0.28511	1.40489	0.00000	0.52271	0.33798	2.28594	4.65188	0.03160	0.04469	0.39339	0.05010	0.37965	0.05801	0.08191	0.04469	0.02396	0.09081	2.618451e-17	0.09099
0.23371	0.09514	0.03601	0.02276	0.28440	1.21703	0.03421	0.03160	0.49820	0.09480	0.16167	0.11330	0.06932	0.03610	0.05560	0.04469	0.01746	0.41240	1.23804	0.11729	0.44721	0.28968	2.73175	3.04631	0.06557	0.03421	0.13029	0.04469	0.29446	0.06711	0.17716	0.03160	0.04469	0.12842	0.14165	0.18199
0.12169	0.14116	0.13251	0.03465	1.07865	0.26035	0.10176	0.01850	0.58014	0.03415	0.13407	0.17161	0.01414	0.03160	0.03160	0.08066	0.06476	0.22701	0.93447	0.23174	0.57772	0.38623	2.09439	1.40000	0.12882	0.02267	0.22567	0.03160	0.14830	0.06493	0.20496	0.03585	0.01466	0.09081	0.08847	0.13649
0.21392	0.06320	0.02627	0.29130	0.86962	0.05646	0.07741	0.01310	0.39339	0.04666	0.22378	0.26026	0.01414	0.03462	0.10526	0.21198	0.11314	0.20618	2.16220	0.08294	1.44729	3.22972	1.56205	2.28035	0.31323	0.01853	0.08170	0.08375	0.12640	0.04851	0.08191	0.03160	0.03160	0.14202	0.22450	2.715934e-8
0.22471	0.06465	0.18803	0.02276	1.92011	0.43709	0.04470	0.01850	0.25286	0.03160	0.23643	0.25539	0.09272	0.06320	0.09159	0.39343	0.14405	0.03160	0.93447	0.28284	2.02015	2.90710	2.34094	1.40281	0.43862	0.03421	0.08274	0.01850	0.06454	0.03483	0.13460	0.05601	0.03585	0.52077	0.12430	0.13649
0.18960	0.15859	0.05589	0.08088	0.27530	0.48983	0.03662	0.03662	0.30169	0.03659	0.19480	0.23222	0.10247	0.03462	0.08938	0.15800	0.08662	0.15199	1.59208	0.34649	2.02498	2.54865	1.71254	1.00343	0.46010	0.03421	0.09908	0.05340	0.05475	0.06539	0.09993	0.06704	0.04926	0.36824	0.12430	0.18199
0.04866	0.02256	0.04503	0.09637	1.34254	0.03991	0.02267	0.01853	0.37659	0.08935	0.10481	0.09993	0.16659	0.06557	0.01746	0.09993	0.15199	0.36642	1.97622	0.11706	2.00998	1.92747	1.60215	0.20000	0.37396	0.04838	0.03662	0.06585	0.07741	0.04853	0.06543	0.07832	0.07832	0.30466	0.10127	0.48468
0.07066	0.05516	0.14069	0.01428	0.63985	0.04323	0.01850	0.01850	0.08274	0.14301	0.19050	0.16376	0.18045	0.02469	0.12447	0.12719	0.10526	0.22189	1.68498	0.08294	1.53019	1.08611	0.68795	0.61131	0.31122	0.03160	0.13407	0.05335	0.06454	0.05791	0.17328	0.05601	0.07969	0.32225	0.10127	0.36351
0.20500	0.04721	0.02766	0.04469	1.63078	0.81893	0.24005	0.04838	0.18961	0.06459	0.08274	0.03160	0.16905	0.01414	0.18960	0.17592	0.10674	0.47819	2.91824	0.21651	1.10125	1.01980	1.13483	2.68820	0.11226	0.02267	0.06322	0.02616	0.05340	0.02044	0.09593	0.07085	0.07969	0.21965	1.170405e-8	0.21965
0.20506	0.06320	5.430779e-3	0.03160	0.31600	0.51685	0.20880	0.03421	0.11480	0.10722	0.04838	0.04659	0.09159	0.04469	0.22472	0.27792	0.14125	0.26732	1.13137	1.12318	1.30666	0.48294	0.62708	3.60000	0.16113	0.05923	0.07066	0.05917	0.05923	0.03177	0.13029	0.03483	0.06323	0.15442	0.14845	0.21965
0.07935	0.05275	0.05895	0.03468	1.55822	0.05970	0.19611	0.03418	0.03662	0.19215	0.09583	0.09993	0.10674	0.01414	0.34985	0.15800	0.07929	0.59304	4.57586	0.28294	0.44721	0.00000	0.73124	3.10483	0.24368	0.14830	0.15164	0.06447	0.08938	0.01826	0.19111	0.03584	0.06488	0.21965	0.14845	0.22787
0.07962	0.03636	0.14399	0.05676	0.12011	0.72663	0.17210	0.06451	0.19222	0.07797	0.01310	1.578737e-16	0.12447	0.03610	0.26927	0.27026	0.17602	0.82236	3.75118	0.08294	0.65372	0.71706	0.46859	2.80713	0.27210	0.07741	0.17787	0.04842	0.08065	0.03287	0.05071	0.06543	0.07968	0.21965	0.14845	0.20000
0.05783	0.06571	0.05031	0.10236	0.95273	0.44494	0.17400	0.03662	0.11554	0.07753	0.08759	0.01850	0.08986	0.02469	0.30462	0.37960	0.07734	0.89642	3.05319	0.00000	0.79146	0.63246	1.54084	2.28035	0.23977	0.07741	0.10481	0.03661	0.07066	0.04861	0.22295	0.07967	0.09593	0.14202	0.14845	0.29081
0.06490	0.11713	0.19187	0.07931	1.32738	0.03205	0.05178	0.01850	0.08065	0.12741	0.02616	0.08065	0.11175	0.01746	0.17602	0.46010	0.12760	0.87401	2.44080	0.00000	0.28284	1.53019	1.36847	0.56569	0.21198	0.03160	0.16619	0.07746	0.10791	0.06427	0.16113	0.11266	0.11883	1.422328e-8	0.23333	0.21965
0.09249	0.16560	0.12414	0.09613	0.26120	0.02482	0.05475	0.04469	0.11330	0.09992	0.05010	0.08065	0.14442	0.01414	0.08662	0.51791	0.07802	1.15549	6.68273	0.49140	0.40851	1.82771	1.16808	0.23174	0.16113	0.05923	0.30370	0.05482	0.18825	0.04677	0.04626	0.18424	0.10651	0.22787	0.10085	0.12842
0.06490	0.01925	0.11640	0.05064	1.25525	0.57228	0.03421	0.18238	0.08753	0.04469	0.08376	0.12505	0.12235	0.14537	0.06557	0.28494	0.19222	0.97369	0.94281	0.35355	0.49001	2.82843	1.61245	0.31706	0.04896	0.08759	0.36195	0.03434	0.07742	0.04820	0.17716	0.18941	0.07066	0.29081	0.10085	0.20000
0.07962	0.06320	0.07893	0.05763	0.10900	0.51658	0.05010	0.23958	0.10807	0.01758	0.19222	0.04865	0.03610	0.11394	0.04469	0.40153	0.34804	0.83665	0.94281	0.28284	0.31706	3.14078	0.84853	0.33798	0.15713	0.01850	0.33392	0.04842	0.14132	0.06826	0.05071	0.19409	0.15063	0.31063	0.22711	0.15442
0.09628	0.15859	0.21923	0.09480	0.42191	0.22180	0.03662	0.22356	0.25674	0.09905	0.17110	0.02267	0.18338	0.10526	0.02469	0.44689	0.14780	0.87796	0.94281	0.37487	0.00000	3.87350	1.13743	0.51042	0.05105	0.12775	0.29918	0.01850	0.09993	0.09660	0.09993	0.22853	0.08938	0.42446	0.22711	0.14202
0.01683	0.13454	0.17026	0.12648	0.45559	1.05058	0.01310	0.19986	0.21236	0.15011	0.18240	0.06343	0.19175	0.09993	0.06937	0.36506	0.10674	0.96263	0.74536	0.74443	0.68294	3.18948	1.44222	0.21651	0.05835	0.11762	0.28500	0.22082	0.09659	0.03277	0.04854	0.22632	0.13030	0.31063	0.22140	0.32225
0.09179	0.01361	0.16553	0.07848	1.05072	0.27930	0.03160	0.23005	0.20760	0.14131	0.19442	0.07552	0.22916	0.09639	0.03462	0.27026	0.26888	0.90393	0.61244	0.40000	0.48995	3.25576	1.41631	0.25000	0.12235	0.10870	0.01850	0.23865	0.07649	0.01694	0.07832	0.07175	0.22599	0.09081	0.28284	0.14202
0.09179	0.03636	0.03569	0.11073	0.12702	0.10205	0.03421	0.03160	0.24177	0.09659	0.20973	0.03421	0.16897	0.05560	0.06329	0.31161	0.63156	0.90116	0.62708	0.51042	0.71162	1.34164	1.89353	0.13823	0.05835	0.11480	0.16022	0.25359	0.06454	0.01694	0.12639	0.03585	0.30790	0.10919	0.28284	0.29081
0.08605	0.08306	0.22610	0.11104	0.97543	0.08996	0.01850	0.03421	0.17697	0.03661	0.04469	0.05178	0.10526	0.03462	0.15800	0.29835	0.62711	0.83276	1.78885	1.15234	1.15234	0.20000	1.40281	2.35702	0.05835	0.07630	0.38294	0.26443	0.03421	0.02073	0.19222	0.04469	0.16993	0.09081	0.13839	0.41464
0.21188	0.01361	0.21520	0.09130	0.07808	0.52357	0.03662	0.05923	0.03160	0.03160	0.05178	0.10329	0.04709	0.04469	0.24300	0.21867	0.75378	0.84261	2.11339	0.23174	0.86054	0.34649	0.52271	1.21165	0.03160	0.07742	0.49158	0.16972	0.03421	0.01466	0.20478	0.03585	0.24911	0.20000	0.11215	0.22787
0.03580	0.04866	0.17298	0.08454	0.31444	0.29897	0.01310	0.01853	0.13534	0.01851	0.06585	0.02267	0.03610	0.01414	0.30186	0.12122	0.94526	0.42962	1.90049	0.21651	0.80852	1.08294	1.04906	1.47403	0.08355	0.14823	0.27313	0.06319	0.16113	0.05602	0.16113	0.34708	0.12640	0.22787	0.10906	0.42446
0.02381	0.05516	0.14859	0.09993	0.04469	0.17212	0.01850	0.05923	0.13419	0.04469	0.12775	0.08759	0.04906	0.02247	0.23929	0.11394	0.73072	0.46212	1.78885	0.44721	0.63246	0.49001	1.48096	1.71906	0.09993	0.15908	0.50953	0.06455	0.24177	0.12268	0.17017	0.34181	0.05141	0.28284	0.04513	0.22787
0.10036	0.02256	0.24576	0.15800	0.85231	1.53555	0.01850	0.03160	0.11183	0.03421	0.05475	0.09993	0.02469	0.01414	0.25340	0.11816	0.50580	0.36547	1.30929	0.49001	0.60571	1.04894	1.42387	0.52367	0.13442	0.22378	0.18397	0.06584	0.19729	0.14133	0.09993	0.60010	0.13540	0.22787	0.04513	0.15442
0.04843	0.07066	0.25467	0.09125	0.11187	0.23093	0.01850	0.05475	0.08737	0.06322	0.01850	0.12505	0.08662	7.351224e-18	0.15800	0.37876	0.72749	0.25609	0.40000	0.37487	0.68795	2.22362	1.49243	0.75295	0.17546	0.04469	0.54090	0.07066	0.18426	0.08147	0.01694	0.53680	0.11302	0.28284	0.10848	0.19303
0.08003	0.01361	0.20572	0.17876	0.79068	0.08344	0.03160	0.03662	0.10790	0.02618	0.02267	0.15800	0.08252	0.06937	0.05560	0.46977	0.28494	0.09993	0.78403	0.11706	0.55440	2.58397	1.81435	0.60571	0.23975	0.10722	0.26152	0.04655	0.42998	0.08404	0.02240	0.55773	0.11039	0.21965	5.701543e-17	0.37978
0.09993	0.04521	0.16688	0.09987	0.08323	0.03542	0.06585	0.02616	0.05475	0.03662	0.07066	0.06320	0.10986	0.05560	0.09993	0.40461	0.22614	0.11394	0.89443	0.21651	0.37487	2.61815	1.05279	0.44839	0.19013	0.17017	0.90339	0.17159	0.31647	0.04468	0.04854	0.51051	0.19036	0.12842	0.20000	0.07567
0.05783	0.01361	0.02978	0.27383	0.15800	0.18392	0.05923	0.03421	0.05175	0.06320	0.10481	0.01850	0.04906	0.09272	0.03462	0.39971	0.26580	0.15863	1.13137	0.28284	0.40851	2.35134	0.48294	0.93498	0.17632	0.25155	0.76103	0.11762	0.09908	0.05602	0.05141	0.57305	0.11393	0.09081	0.20000	0.05675
0.01477	0.05275	0.23898	0.12402	0.61961	0.27823	0.08259	0.01310	0.08753	0.01310	0.09570	0.03421	0.01746	0.05560	0.06557	0.36533	0.21581	0.25340	1.72047	0.14347	0.63246	3.84698	0.37487	0.48294	0.17602	0.27856	0.56942	0.06453	0.12973	0.03484	0.05141	0.31444	0.01466	0.19924	0.22866	0.05675
0.03580	0.03441	0.63144	0.27533	0.66637	0.35466	0.11465	0.03160	0.04469	0.13029	0.05923	0.07066	0.08000	0.11394	0.03160	0.27026	0.19672	0.11394	1.85659	0.33798	0.92081	4.52237	0.71162	0.77021	0.14283	0.43964	0.28394	0.04469	0.14132	0.03585	0.26452	0.48244	0.03585	0.14675	0.22785	0.07567
0.02088	0.01799	0.16477	0.09993	0.09337	0.15367	0.08248	0.04470	0.08274	0.07066	0.03421	0.06585	0.05207	0.05560	0.05560	0.22345	0.42402	0.13361	1.47403	0.44721	1.31377	3.92746	0.51042	0.96932	0.13048	0.43964	0.58424	0.09479	0.23503	0.07068	0.24215	0.18797	2.451502e-17	0.14675	0.31924	0.18199
0.01477	0.03441	0.30085	0.27750	0.60922	1.78406	0.09904	0.04469	0.08065	0.05340	0.11394	0.05178	0.09993	0.02247	0.15800	0.25477	0.42396	0.27696	1.16619	0.44721	1.37398	3.57531	0.89066	0.93814	0.06707	0.21198	0.12973	0.08259	0.13534	0.04468	0.21181	0.09993	0.01466	0.08396	0.14535	1.781217e-8
0.04866	0.03636	0.08081	0.04961	0.01909	0.21746	0.05475	0.05923	0.05340	0.07741	0.11244	0.01850	0.03610	0.14491	0.26999	0.08986	0.61939	0.17812	1.14342	0.71162	1.72047	5.14193	1.00000	1.48525	0.17303	0.09993	0.18393	0.03160	0.47815	0.05140	0.22295	0.03483	0.01694	0.21223	0.14535	0.14202
0.07066	0.05275	0.12012	0.23688	0.72374	0.33747	0.10716	0.05475	0.01853	0.09993	0.08170	0.03421	0.04906	0.09480	0.08252	0.17632	0.27183	0.12235	1.13743	0.49001	1.12014	5.34149	0.20000	1.33401	0.17987	0.07066	0.42513	0.08274	0.66435	0.06865	0.21181	0.03267	0.01694	2.903532e-9	0.10156	0.09081
0.09355	0.04959	0.09709	0.31197	1.16092	0.04451	0.02257	0.04469	0.07066	0.03421	0.05923	0.06714	0.08662	0.08355	0.27410	0.25192	0.05835	0.12595	1.13743	0.52271	0.90531	2.84808	0.34649	0.80852	0.33438	0.06320	0.54950	5.391817e-3	0.80366	0.09480	0.12267	0.03483	0.05141	0.32225	1.654361e-25	0.09081
0.09628	1.084883e-16	0.05811	0.03595	0.55187	0.52979	0.05908	0.01850	0.01850	0.01853	0.01853	0.05475	0.06707	0.07863	0.35656	0.15896	0.14386	0.04896	1.78885	0.40851	1.89737	2.84808	0.37487	0.84853	0.46280	0.12169	0.30141	0.07649	0.49353	0.05601	0.04926	0.02191	0.02396	0.21965	0.09903	0.14202
0.03580	0.06394	0.57536	0.26152	0.06443	0.11029	0.04462	0.05475	0.01850	0.01310	0.03662	0.03661	0.03160	0.08189	0.28111	0.14125	0.27183	0.03462	2.21877	0.51042	1.50969	1.73209	0.73923	0.21651	0.45562	0.23441	0.14363	0.02267	0.64452	0.04625	0.05602	0.02396	0.03160	0.20000	0.09903	2.419270e-8
0.05783	0.01361	0.03995	0.29014	0.54914	0.28653	0.04835	0.07630	0.03662	0.03421	0.03160	0.19442	0.08000	0.07066	0.09481	0.06476	0.38359	0.06707	2.14342	0.77021	1.69478	3.07318	0.55972	0.69290	0.29139	0.19228	0.12708	0.01310	0.15854	0.03158	0.08403	0.03585	0.02396	0.15442	0.09903	0.14202
0.09993	0.04469	0.11375	0.03611	0.02282	0.05916	0.01849	0.11405	0.01850	0.04469	0.08259	0.17315	0.05835	0.05105	0.17557	0.11662	0.59247	0.19584	2.38349	0.93447	2.43311	2.40619	0.55440	0.62708	0.27210	0.23399	0.20114	0.08065	0.40714	0.06543	0.06488	0.03585	0.02396	0.09081	0.15189	0.09081
0.09628	0.02256	0.11837	0.28080	0.97797	1.56734	0.11629	0.05923	0.20234	0.05010	0.09993	0.18393	0.06469	0.02247	0.06487	0.05835	0.32042	0.19222	1.58563	0.60000	3.60690	1.53594	0.69290	1.08611	0.14405	0.24066	0.25477	0.05475	0.52969	0.03586	0.06543	0.03585	0.05792	2.847978e-8	0.04677	0.09081
0.13029	0.05880	0.05647	0.41576	1.34666	0.08035	0.09857	0.01853	0.23689	0.06320	0.05923	0.19729	0.08000	0.13559	0.02000	0.16544	0.31600	0.18218	0.99024	0.56569	4.45805	1.26800	0.69290	0.08294	0.08355	0.08065	0.12640	0.10329	0.42513	0.19571	0.09993	0.03160	0.01466	0.14202	0.30265	0.09081
0.08179	0.01925	0.06473	0.04767	0.37989	0.31385	0.08938	0.27161	0.19222	0.10790	0.08065	0.15646	0.07802	0.14455	0.09637	0.16544	0.38051	0.17272	1.69478	0.60653	4.33555	0.39633	0.56569	0.88404	0.07066	0.06320	0.24680	0.09908	0.74731	0.14678	1.754142e-18	0.01466	0.03585	0.09081	0.24476	1.057408e-8
0.05611	0.12713	0.75374	0.18529	0.07707	5.437997e-3	0.10332	0.27331	0.14773	0.04838	0.05475	0.06585	0.03610	0.31721	0.11592	0.07802	0.24941	0.17502	1.60000	1.08925	4.12311	1.05409	0.16555	0.44721	0.01414	0.10329	0.41928	0.10722	0.55734	0.14823	1.754162e-18	1.315614e-17	0.02240	0.21965	0.17834	1.179880e-8
0.03488	0.04959	0.01658	0.12646	0.49673	0.46359	0.09908	0.18426	0.16867	0.01850	1.922558e-16	0.01850	0.03462	0.33778	0.08598	0.09988	0.53812	0.03462	1.53594	0.89066	4.09629	3.16228	0.41678	1.40000	0.03462	0.03160	0.25280	0.08759	0.44465	0.13713	0.02240	0.01466	0.03483	0.32791	0.35151	8.979524e-9
0.11261	0.05516	0.26119	0.08154	0.03160	0.17752	0.04469	0.20313	0.17650	0.03160	0.06585	0.01850	0.02469	0.36841	0.15867	0.06320	0.47421	0.03160	1.95137	0.49692	3.98497	3.57946	0.28284	2.12603	0.01414	0.03160	0.39895	0.07742	0.47819	0.15783	0.04469	0.05141	0.03585	0.22787	0.34936	1.221106e-8
0.20712	0.10841	0.15500	0.06502	0.97346	0.23382	0.04838	0.25307	0.19986	0.01853	0.05010	0.03160	0.02000	0.34759	0.10574	0.08662	0.67716	0.03160	2.60768	0.20000	3.08451	3.76933	0.21651	2.03961	0.27583	0.04838	0.24348	0.03421	0.22964	0.24018	0.29134	0.05602	0.04926	0.22787	0.24790	0.09081
0.26455	0.10925	0.14673	0.33183	1.35733	1.20835	0.05178	0.01310	0.08938	0.01850	0.04659	0.04469	0.02247	0.50537	0.04303	0.06937	0.76951	0.04906	0.65372	0.57772	2.97390	2.66743	1.10125	3.42345	0.19876	0.08259	0.26941	0.10722	0.26058	0.22566	0.19697	0.03585	0.09993	0.28284	0.09466	0.22787
0.03488	0.05778	0.01376	0.08664	0.15176	0.17196	0.06585	0.06454	0.12708	0.04469	0.17698	0.05475	0.06476	0.02245	0.09274	0.02469	0.66954	0.01746	0.44721	0.21651	3.51706	3.04423	0.40000	5.02666	0.06557	0.07066	0.29134	0.11394	0.16867	0.09721	0.21198	0.04926	0.08938	0.20000	0.23833	0.12842
0.09071	0.18960	0.09816	0.12740	0.03399	0.32992	0.04659	0.19228	0.11762	0.06070	0.23503	0.06714	0.04469	0.05781	0.02946	0.07802	0.59973	0.08938	0.73124	0.51706	3.20107	3.24150	0.38275	6.32456	0.04896	0.07630	0.20114	0.07066	0.07851	0.03606	0.21583	0.03483	0.11173	0.28284	0.19567	0.09081
0.09480	0.07801	0.65884	0.08546	0.64709	0.03725	0.03421	0.16167	0.15908	0.02930	0.19222	0.01853	0.06469	0.01351	0.06763	0.08252	0.66757	0.02247	0.44721	0.51706	2.48570	2.20291	0.23911	6.08680	0.20424	0.04659	0.12775	0.08259	0.19986	0.05602	0.20234	0.01466	0.11044	0.14202	0.18266	0.20000
0.17277	0.01361	0.01901	0.17876	0.01251	0.57229	0.03662	0.15800	0.12505	0.03421	0.17746	0.03421	0.03462	0.07080	0.11014	0.07863	0.55613	0.07802	0.72111	0.40851	3.39960	1.10125	0.38623	3.03684	0.14728	0.05923	0.03662	0.06320	0.20973	0.08938	0.10206	0.01695	0.07786	0.32791	0.23434	0.09081
0.27148	0.14791	0.21474	0.03169	1.06286	0.16400	0.03160	0.12640	0.04469	0.01850	0.22159	0.13950	0.03160	0.06322	0.09599	0.06476	0.62084	0.14132	0.68796	0.44721	3.82049	1.20570	0.28968	3.47815	0.16687	0.03421	0.20521	0.10329	0.41080	0.12838	0.05602	2.036288e-5	0.07832	0.34168	0.28297	0.28483
0.07797	0.07771	0.15330	0.02174	0.21038	0.28716	0.15315	0.09908	0.12973	0.09908	0.03421	0.14132	0.03462	0.15713	0.11110	0.08066	0.57403	0.11394	0.11706	0.40000	3.60096	0.63246	0.34649	3.20122	0.10526	0.03421	0.26527	0.05178	0.35278	0.10206	0.05071	0.03611	0.07066	0.34168	0.14178	2.332282e-8
0.07976	0.06465	0.09406	0.18072	0.05426	0.70946	0.18033	0.01853	0.20973	0.12505	0.13029	0.14765	0.02000	0.08196	0.04420	0.04896	0.48917	0.10674	0.00000	0.72184	4.73752	0.55440	1.21655	3.96449	0.19905	0.07066	0.33591	0.04469	0.45244	0.04854	0.07066	0.05612	0.07066	0.63971	0.14178	0.26854
0.27552	0.09577	0.04529	0.09549	1.15841	0.21346	0.17829	0.03421	0.24642	0.08259	0.05923	0.23580	0.06557	0.04745	0.01414	0.03160	0.53944	0.23366	0.28968	0.74443	5.81944	0.71706	1.80380	3.25576	0.38236	0.03662	0.55026	0.06454	0.45550	0.04469	0.08615	0.03835	0.02240	0.52849	0.10383	0.31196
0.21204	0.12201	0.09689	0.13029	0.01909	0.06715	0.17017	0.03160	0.02616	0.09993	0.23643	0.20880	0.04469	0.05135	0.07945	0.04469	0.57403	0.16687	0.00000	0.51706	6.00925	0.23174	1.26491	3.15966	0.36506	0.03160	0.81266	0.03661	0.31915	0.01466	0.08191	0.01687	0.05792	0.40371	0.13298	0.38683
0.36014	0.05880	0.92250	0.24657	0.96321	0.28114	0.26623	0.12640	0.08759	0.20687	0.23571	0.07066	0.03610	0.07946	0.08888	0.08662	0.46977	0.09585	0.23911	0.93498	1.05409	0.11706	0.82462	1.08294	0.36174	0.04838	0.69795	0.13407	0.29334	0.01694	0.10946	0.04854	0.07969	0.44721	0.10442	0.38683
0.17888	0.05516	0.01803	0.14349	0.18185	0.03992	0.19442	0.05923	0.16575	0.08170	0.26026	0.04470	0.01453	0.08355	0.07061	0.01414	0.48846	0.27183	0.51063	0.60000	0.35355	0.11706	0.23174	2.65092	0.16905	0.02267	0.79723	0.06320	0.27495	0.05602	0.09630	0.03591	0.17185	0.58008	0.10432	0.41018
0.03419	0.07066	0.29613	0.08001	0.07571	0.58334	0.19133	0.10329	0.08759	0.08759	0.17161	0.07066	0.02247	0.08000	0.14728	0.02247	0.65755	0.24055	0.44721	0.93498	0.51042	0.92081	0.40851	2.54865	0.04788	0.04470	0.71255	0.05475	0.22197	0.04854	0.02073	0.05916	0.14132	1.41421	0.22300	0.50557
0.19227	0.13286	0.07805	0.25746	1.40954	0.59249	0.25539	0.03421	0.07066	0.09570	0.17400	0.08759	0.03177	0.26881	0.17828	0.01414	0.57174	0.16110	0.79146	0.72111	0.28294	0.93862	1.34639	2.86356	0.04469	0.03661	0.69376	0.06714	0.18747	0.06320	0.03483	0.20082	0.13751	1.15308	0.36242	0.36824
0.11026	0.08033	0.11617	0.09993	0.19710	0.29312	0.25539	0.08170	0.05475	0.11394	0.10870	0.08844	0.04896	0.18338	0.09154	0.09585	0.46977	0.22654	0.57772	0.41678	0.16555	0.48995	0.80429	1.09590	0.11344	0.09908	0.57360	0.04469	0.30614	0.07832	0.03483	0.17585	0.13566	1.63896	0.49328	0.69938
0.11290	0.08938	0.14157	0.12388	0.67330	0.27942	0.14363	0.08274	0.11244	0.06454	0.02267	0.09128	0.03160	0.17740	0.11314	0.08662	0.58428	0.17304	0.60653	0.40000	0.37487	0.34649	1.51933	0.93814	0.23601	0.03160	0.58663	0.03421	0.24268	0.07066	0.02240	0.18767	0.15666	1.64585	0.23454	0.87423
0.27552	0.03636	0.03058	0.08008	0.15800	0.42396	0.09836	0.06320	0.12640	0.10790	0.03662	0.07741	0.02469	0.13559	0.12759	0.05835	0.53813	0.06593	0.14347	0.51706	0.51042	0.31706	2.43311	1.49928	0.23545	0.06585	0.47400	0.26023	0.46010	0.04469	0.02240	0.21304	0.01694	1.49142	0.26958	1.37437
0.28954	0.01361	0.54781	0.29115	0.06239	0.36964	0.09480	0.10722	0.05923	0.07742	0.06714	0.05474	0.08000	0.14491	0.04469	0.04574	0.38220	0.02247	0.29484	0.41678	0.30620	0.72656	2.92894	1.11624	0.24066	0.09659	0.59488	0.18424	0.48710	0.04469	0.02396	0.23674	0.01466	0.57093	0.14004	0.24234
0.01453	0.03636	0.06613	0.13488	1.37202	0.27689	0.02616	0.01310	0.06322	0.12101	0.06320	0.08844	0.04469	0.07929	0.03160	7.051605e-17	0.28924	0.01414	0.23174	0.75295	0.41678	0.40851	2.88531	1.62663	0.13555	0.09908	0.56405	0.19986	0.43046	0.06320	0.01694	0.05812	0.03483	0.57093	0.18158	0.21429
0.21326	0.09293	0.15959	0.10662	0.46766	0.04959	0.00000	0.01850	0.04469	0.17400	0.09908	0.07085	0.06707	0.02000	0.03601	0.06320	0.30480	0.03160	0.23174	0.80000	0.61131	0.37487	2.10207	2.22273	0.14455	0.07742	0.66691	0.22567	0.27756	0.14683	0.03585	0.11326	0.01466	0.28284	0.15499	0.17143
0.07066	0.05880	0.03450	0.18649	0.44999	0.16762	0.01310	0.01850	0.03160	0.16867	0.06585	0.07066	0.03462	0.03462	0.05105	0.01746	0.16905	0.13029	0.20000	0.48294	0.31706	1.03926	0.72111	2.20156	0.05560	0.14132	0.62424	0.25276	0.37510	0.12197	0.03160	0.17248	0.06865	0.20000	0.27315	0.10596
0.05611	0.08938	0.02910	0.09993	0.19056	0.58893	0.05923	0.02267	0.01853	0.19902	0.05475	0.15800	0.05560	0.03610	0.08000	0.03610	0.16953	0.61866	0.14347	0.23174	0.30620	0.92450	0.14347	1.15445	0.06320	0.15646	0.57417	0.03160	0.28709	0.04967	0.01694	0.14068	0.02240	0.09081	0.14219	0.10919
0.21158	0.05275	0.63484	0.20595	0.12466	0.67936	0.11762	0.00000	0.03421	0.07741	0.07066	0.18066	2.045676e-17	0.01746	0.09159	0.03160	0.33283	0.60544	0.48995	0.00000	0.62708	0.79206	0.63246	1.07703	0.06320	0.23863	0.38730	0.05346	0.22164	0.06352	0.01694	0.11264	0.02396	0.72111	0.22464	1.546577e-8
0.26241	0.09143	0.04108	0.11342	1.26855	0.59124	0.03421	0.01850	0.03662	0.08938	0.11179	0.18434	0.03462	0.14386	0.13029	0.05560	0.45574	0.54419	0.00000	0.08294	0.67862	1.05279	1.12840	0.28284	0.12640	0.07085	0.33472	0.01310	0.24917	0.04637	5.797334e-17	0.07920	0.13029	0.72111	0.13357	0.10919
0.01477	0.03441	0.03579	0.28074	0.68394	0.72733	0.08065	0.03661	0.11554	0.08759	0.08259	0.16634	1.151110e-17	0.11314	0.10526	0.09585	0.49741	0.45642	0.97033	0.08294	0.80429	1.39792	1.91992	0.21651	2.192690e-18	0.01310	0.30003	0.07741	0.17546	0.06314	0.01484	0.07844	0.04926	0.72111	0.09520	0.10919
0.04637	0.03441	0.04773	0.16191	0.24583	0.29134	0.08065	0.03160	0.27817	0.03662	0.09573	0.17787	0.03462	0.11360	0.31944	0.17017	0.44014	0.45568	0.49001	0.44721	0.61131	0.32773	2.10819	1.40000	0.03610	0.07742	0.40263	0.15800	0.19133	0.04855	0.01466	0.10205	0.05602	1.00000	0.13427	0.14202
0.31600	0.04469	0.02551	0.07880	0.12466	0.17733	0.08759	0.04659	0.28878	0.00000	0.15101	0.03160	0.05560	0.15800	0.34349	0.09639	0.58711	0.03610	0.41678	0.56569	0.51042	1.00000	3.85091	2.71833	0.08938	0.06320	0.43772	0.26567	0.08065	0.10201	0.03168	0.01549	0.08147	1.00000	0.13871	0.15442
0.17017	0.06465	0.84513	0.23425	1.22100	0.05429	0.06585	0.01417	0.24005	0.10870	0.04503	0.01310	0.07802	0.11344	0.31639	0.09585	0.38096	0.04906	0.44721	1.05186	0.08294	1.21095	2.79508	2.81426	0.08252	0.11478	0.47868	0.46808	0.07085	0.12423	0.03483	0.06490	0.08191	0.28284	1.610453e-3	0.14202
0.09480	0.03441	0.22325	0.05670	1.09557	0.26852	0.01850	0.04469	0.26567	0.08170	0.03924	0.02267	0.05835	0.12595	0.27084	0.21198	0.25855	0.04574	0.61131	0.77021	0.28284	0.28284	2.69943	2.03961	0.04574	0.08938	0.40603	0.34634	0.06320	0.05616	0.01466	0.05158	0.46977	0.52999	0.09521	0.10919
0.06850	0.13029	0.12623	0.30696	0.14132	0.23634	0.01850	0.02267	0.19986	0.18426	0.04469	0.03421	0.08000	0.03610	0.28615	0.09993	0.28075	0.05105	0.44721	0.82108	0.21651	0.51042	2.86375	2.11706	0.04906	0.08170	0.29050	0.25357	0.09993	0.07069	1.736522e-17	0.02092	0.46104	0.20000	0.09521	0.15442
0.10036	0.07066	0.11077	0.07086	0.16593	0.61854	0.03160	0.01927	0.08170	0.15808	0.03661	0.05010	0.03610	0.02247	0.12447	0.10674	0.30299	0.01414	0.11706	0.23174	0.28284	1.26491	1.89893	1.67130	0.08252	0.06454	0.13553	0.21077	0.12514	0.03592	0.01466	0.03443	0.46993	0.12842	1.600254e-16	0.22787
0.04933	0.06320	0.01759	0.08003	0.85913	0.18397	0.01310	0.02616	0.14773	0.13029	0.07630	0.01310	0.02469	0.08066	0.00000	0.09480	0.03462	0.03160	1.06751	0.14347	0.40851	0.88682	1.94311	0.77021	0.02247	0.07741	0.07851	0.07851	0.23580	0.04849	0.01466	0.03084	0.47400	0.20509	0.13912	0.09081
0.06490	0.05880	1.20973	0.06320	1.03656	1.16492	0.03421	0.01850	0.18426	0.03421	0.05178	0.03421	0.02469	0.03462	0.05560	0.11314	0.05835	0.05835	2.70717	0.00000	0.28284	0.69290	1.84789	1.15234	7.595125e-6	0.14772	0.05475	0.34433	0.17930	0.05639	0.01466	0.04657	0.44778	0.33787	0.09512	0.22787
0.03160	0.09293	0.21721	0.16365	0.10456	0.40559	0.03421	0.01850	0.23430	0.03661	0.10329	0.05923	1.754158e-18	0.06476	0.01414	0.11394	0.09480	0.06469	3.05287	0.56569	0.08294	0.63246	1.95264	1.89428	0.16544	0.09570	0.06320	0.24066	0.19228	0.06538	0.01694	0.07041	0.03160	0.69230	9.963055e-4	0.25000
0.03580	0.07066	0.09294	0.21115	0.13618	0.07671	0.05475	2.631594e-17	0.22680	0.09908	0.02267	0.01850	0.01414	0.17828	0.03160	0.09585	0.01746	0.07929	2.37612	0.41678	0.44721	0.34649	0.91706	0.88682	0.03462	0.10481	0.09993	0.17017	0.19480	0.05619	0.02240	0.04463	7.795746e-17	0.04540	0.05543	0.15135
0.09993	0.14734	0.11916	0.13527	0.56336	0.33651	0.05923	2.671845e-17	0.26778	0.05475	0.05475	0.14363	0.04469	0.19584	0.03160	0.04574	0.02469	0.01404	3.77359	0.82108	0.28284	0.41678	1.54322	1.45602	0.09639	0.05475	0.02616	0.14304	0.10791	0.02069	0.01694	0.02251	0.02240	0.11826	0.17250	0.15135
0.12726	0.04469	0.04896	0.05024	0.92291	0.24383	0.13029	0.02267	0.23580	0.03421	0.01310	0.26152	0.01414	0.21793	0.03160	0.23601	0.35646	0.04263	4.04969	0.93814	0.32773	0.49692	1.97622	2.23607	0.11033	0.02616	0.06585	0.13534	0.10948	0.01466	0.01694	0.03514	0.04469	0.10919	0.05549	0.16053
0.05611	0.05142	0.62385	0.15065	0.08204	0.18706	0.20270	0.02616	0.11405	0.03662	0.05010	0.33190	0.05835	0.23433	0.04896	0.33845	0.41582	0.03142	2.18622	0.56569	0.28284	0.29484	3.20107	2.11339	0.33775	0.07742	3.879265e-17	0.03160	0.14012	0.06502	0.03160	0.06545	0.03160	0.20000	0.11559	0.09081
0.07935	0.09293	0.21629	0.03462	0.17814	1.15514	0.07742	3.024323e-17	0.24612	0.01850	0.01310	0.48240	0.05835	0.35366	0.03610	0.24941	0.31305	0.03143	2.33238	0.97033	0.41678	0.08294	2.91941	2.13201	0.20094	0.07742	0.07066	0.05340	0.12973	0.04631	0.08403	0.04457	0.04854	0.21965	0.05546	0.09081
0.35106	0.06394	0.08717	0.25484	0.52971	0.24881	0.06454	0.02267	0.26152	0.01850	0.04838	0.42513	0.01414	0.32468	0.11670	0.34766	0.31346	0.03417	3.44093	0.29484	0.28284	0.28294	2.69038	3.42772	0.30585	0.11480	0.01310	0.05474	0.09583	0.03148	0.05602	0.05076	0.04626	0.20000	0.22803	0.10919
0.07962	0.19045	0.19260	0.16810	1.13941	1.45842	0.06585	0.01850	0.16867	1.549846e-17	0.09480	0.26813	0.01414	0.20372	0.14909	0.26045	0.30480	3.040739e-17	2.30489	0.20000	0.29484	0.34649	1.70656	1.44222	0.22224	0.15908	0.11394	0.16113	0.09993	0.08321	0.15480	0.06718	0.02240	0.10919	0.20000	0.20000
0.07066	0.03160	0.04556	0.06452	0.10731	0.20524	0.05475	0.01310	0.15800	0.03662	0.06320	0.19005	0.01414	0.16492	0.24894	0.05560	0.06557	0.07880	1.17920	0.20000	1.11051	0.40851	1.96977	0.73923	0.23601	0.18240	0.04469	0.19980	0.07085	0.02385	0.10548	0.05610	0.03483	0.10919	0.28284	0.14202
0.30274	0.22489	0.82864	0.03461	0.12783	8.948948e-3	0.10948	0.03421	0.23490	0.03160	0.04470	0.13407	0.04906	0.17740	0.22787	0.03462	0.04906	0.42670	0.36086	0.16555	1.32154	1.15445	0.28284	0.51063	0.05747	0.08259	0.07066	0.14600	0.03421	0.03790	0.10206	0.06329	0.01466	0.10919	0.09728	0.20000
0.15800	0.12549	0.18444	0.09993	0.80749	0.39902	0.04469	0.01310	0.07069	0.05178	0.03160	0.07066	0.04906	0.01414	0.30462	0.11948	0.29086	0.16533	0.69299	0.29484	1.37082	1.07567	0.93862	1.28369	0.08222	0.06714	0.03421	0.16519	0.09993	0.05794	0.03483	0.05795	0.03483	0.14202	0.21932	0.30919
0.12828	0.15800	0.06887	0.13488	1.01503	0.28851	0.04469	0.03421	0.07742	0.03421	0.01310	0.09128	0.03160	0.15643	0.12882	0.10674	0.56791	0.19614	0.80000	0.23174	1.41492	1.49071	0.32773	0.66667	0.12708	0.08376	0.16575	0.08281	0.14072	0.04854	0.03585	0.03154	0.04853	0.09081	0.09960	0.21965
0.37456	0.01925	0.04730	0.10673	0.12702	0.26659	0.04838	0.01310	1.400554e-6	0.11762	0.01310	0.04469	0.04788	0.03462	0.07066	0.16113	0.74193	0.11344	0.51706	0.00000	1.30929	1.41421	0.40000	0.93054	0.15702	0.08065	0.08938	0.03287	0.11394	0.06320	0.04853	0.03674	0.03160	0.20000	0.10344	0.10919
0.14132	0.11394	0.58922	0.16113	0.13029	1.02170	0.07066	0.02267	0.02616	0.10790	0.01850	0.06322	0.03160	0.04469	0.23397	0.26045	0.53788	0.29978	0.17933	0.51042	0.32773	0.90139	2.00489	0.61131	0.22034	0.22345	0.06585	0.01442	0.12514	0.05141	0.01694	0.02238	0.06320	0.20732	0.10344	0.12842
0.19986	0.01361	0.74661	0.11133	0.81243	0.07077	0.06320	0.03160	0.15783	0.06585	0.03421	0.12169	0.06937	0.03462	0.17740	0.08355	0.53371	1.04251	0.54622	0.44721	0.20000	1.01408	0.40000	0.63246	0.35582	0.28440	0.13407	0.05622	0.30290	0.08014	0.09630	0.03585	0.05141	0.10596	0.06318	0.20000
0.34232	0.21398	0.21476	0.11401	0.71012	1.52267	0.06320	0.03662	0.08061	0.07851	0.05923	0.08637	0.09440	0.01414	0.19986	0.03610	0.32072	0.79447	0.27592	0.92403	0.08294	0.72111	1.16619	0.95255	0.37015	0.30290	0.07066	0.03232	0.28613	0.14455	0.05792	4.385381e-18	0.05792	0.10596	0.07140	0.19303
0.07838	0.09649	0.06315	0.20692	0.12640	0.24364	0.05474	0.04136	0.21273	0.04469	0.06454	0.18208	0.08938	0.02247	0.03610	0.06557	0.07742	0.86309	0.52088	1.18603	0.11706	0.49692	1.47403	1.00050	0.30493	0.28470	0.17546	0.08280	0.17748	0.08615	0.08147	0.01466	0.12267	0.20325	0.06649	0.25737
0.10036	0.03441	5.291420e-3	0.08004	0.08815	0.26720	0.06320	0.23689	0.17930	0.06454	0.02616	0.09102	0.06476	0.03160	0.01746	0.07066	0.15896	1.01180	0.28282	1.04566	0.23174	0.82462	1.93203	0.90531	0.31357	0.24177	0.15800	0.05430	0.22345	0.03585	0.06320	0.02240	0.19695	0.20732	0.21756	1.61126
0.35040	0.02256	0.15903	0.11394	1.03586	0.36221	0.03160	0.15854	0.19050	0.09583	0.01853	0.12505	0.04906	0.11816	0.06320	0.16113	0.07066	1.01094	1.12840	0.81715	0.37487	0.92081	3.62525	0.78403	0.20483	0.05475	0.23005	2.806944e-3	0.26590	0.03483	0.04853	0.02073	0.09253	0.30919	0.21756	2.70281
0.14851	0.17273	0.04363	0.05079	0.68558	0.21054	0.03160	0.17400	0.22345	0.12514	0.01850	0.03613	0.04575	0.03160	0.05560	0.14429	0.06557	0.33330	0.40851	0.58941	0.30620	0.62708	2.76934	0.63246	0.05834	0.05010	0.24612	0.01850	0.11680	0.03585	0.07969	0.03160	0.08615	0.09081	0.15229	2.70281
0.11026	2.403997e-9	0.47719	0.11510	0.12213	0.33511	0.21709	0.20234	0.05178	0.13968	0.03421	0.05958	2.552539e-6	0.02247	0.05105	0.11662	0.11226	0.35366	0.21651	0.90907	0.40851	0.40851	6.08944	0.65372	0.04907	0.05010	0.15808	0.01310	0.02304	0.07066	0.01694	0.02073	0.08615	0.14202	0.28284	2.70281
0.59034	0.13578	0.46596	0.18104	0.12553	1.14779	0.41299	0.23863	0.05475	0.09583	0.08259	0.07163	0.01414	0.05207	0.03462	0.06320	0.16544	0.39595	8.500550e-5	0.73923	0.80000	1.26800	3.17941	0.72111	0.04885	0.10481	0.01850	0.04838	0.14139	0.04469	0.01694	0.03483	0.04626	0.14202	0.14174	0.21404
0.17767	0.16113	0.02333	0.29945	1.24690	0.06439	0.41080	0.28615	0.05925	0.03160	0.04469	0.03160	0.01415	0.19175	0.08355	0.10247	0.17565	0.33614	0.21672	0.41634	1.00343	1.55740	3.17941	1.15234	0.06554	0.08938	0.02616	0.04469	0.19982	0.03160	0.02240	0.05792	0.12637	0.10919	0.13056	0.35355
0.07066	0.03160	0.15808	0.09125	0.77738	1.44961	0.32792	0.10870	0.06601	0.11244	0.05923	0.05587	0.02246	0.03610	0.03160	0.03610	0.32205	0.09993	0.11744	0.21651	1.13483	1.67362	3.17941	1.67130	0.09463	0.11762	0.02616	0.05923	0.13407	0.03585	0.01694	0.06705	0.04951	0.10919	0.13056	0.63316
0.65603	0.11292	0.04352	0.03611	0.17709	0.22245	0.28874	0.10790	0.04595	0.15800	0.05475	0.06320	0.01744	0.13029	0.17592	0.01414	0.05998	0.09480	0.23150	0.31706	1.21655	1.48982	0.47156	2.39349	0.06479	0.09480	0.03421	0.02267	0.05475	0.01694	0.01734	0.09056	0.05071	0.15442	0.13056	0.72111
0.06540	0.13029	0.26920	0.16312	0.14818	0.19140	0.06320	0.01310	0.01849	0.17315	0.01310	0.11718	0.06478	0.35610	0.13029	0.06707	0.18902	0.22345	0.23120	0.11706	1.33216	0.97033	0.79057	2.23128	0.05206	0.04659	0.04470	0.03420	0.16113	0.01466	0.04842	0.08938	0.05071	0.10919	0.10960	0.63316
0.63385	0.16652	0.03507	0.08938	1.46098	0.34530	0.12651	9.040689e-18	0.06325	0.14765	0.22159	0.18924	0.06708	0.25340	0.17783	0.13029	0.12235	0.18045	0.34629	0.08296	1.12318	0.20000	1.11051	1.92520	6.353068e-6	0.05340	0.04838	0.03160	0.11391	0.02073	0.01687	0.05792	0.08938	0.15442	0.21831	0.56569
0.17546	0.11921	0.06809	0.25477	0.40468	0.08213	0.12241	0.01853	0.04805	0.14765	0.14012	0.18001	0.05207	0.12595	0.16042	0.03160	0.23800	0.20551	0.34672	0.23174	1.20570	0.11729	1.51193	0.85660	6.353068e-6	0.01310	0.09128	0.06714	0.05928	0.01694	0.02266	0.05466	0.03483	0.10919	0.20000	0.52999
0.03488	0.15800	0.36365	0.08354	0.24846	0.07159	0.03421	0.01310	0.07999	0.17971	0.19050	0.23001	0.03160	0.09272	0.11033	0.04788	0.29134	0.25934	0.55977	0.44726	1.00000	0.61131	1.29353	1.29843	0.03462	0.06320	0.20645	0.08844	0.10726	0.01694	0.02418	0.06542	0.01693	0.20000	0.20000	0.10919
0.58757	0.08913	0.07105	0.07066	0.13388	0.47208	0.03662	0.03421	0.11071	0.14304	0.16113	0.27082	0.03161	0.07802	0.03462	0.04788	0.20111	0.38051	0.28257	0.32773	0.60000	0.20000	1.30929	0.82462	0.03610	0.05178	0.20972	0.07085	0.20233	0.03160	0.02090	0.05602	0.01466	0.28284	0.20000	0.28284
0.09480	0.09577	0.20362	0.04469	1.28930	1.27383	0.01853	0.03160	0.07118	0.07066	0.19050	0.31864	0.01413	0.32533	0.01746	0.03610	0.21368	0.43472	0.31736	0.57794	0.21651	0.40851	1.06751	1.00683	0.03610	0.03421	0.22345	0.06715	0.14139	0.18940	0.06310	0.07066	0.02073	0.30465	0.22645	0.21965
0.64586	0.20565	0.07725	0.07964		0.02044	0.05340	0.01853	0.07742	0.08759	0.01853	0.29197	0.03160	0.16544	0.15410	0.07066	0.39667	0.14442	0.68278	0.41687	0.08294	1.20286	0.40000	0.88682	0.05560	0.06454	0.22990	0.06585	0.20511	0.21198	0.04833	0.05792	0.16465	0.30465	0.22910	0.21965
0.08938	0.08306	0.17607	0.33636		1.60242	0.05178	0.03421	0.06580	0.08376	0.01853	0.25280	0.01746	0.07066	0.03610	0.02000	0.25752	0.12595	0.86074	0.33758	0.08294	0.82462	0.34649	0.93862	0.06707	0.06714	0.25666	0.02267	0.24643	0.21942	0.02378	0.07861	0.17555	0.44721	0.36827	5.807062e-9
0.15055	0.09293	0.05281	0.08663		0.16040	0.03662	6.807942e-18	0.08184	0.06320	0.06320	0.21284	0.06476	0.05105	0.11662	0.01414	0.37423	0.30073	0.77116	0.63228	0.37487	0.51042	0.29484	0.74443	0.04574	0.05340	0.16568	0.02930	0.18065	0.23527	0.04919	0.06320	0.18155	0.29081	0.36827	0.28284
0.04866	0.20234	0.05486	0.19222		0.25751	0.03206	0.01310	0.03662	0.06320	0.02267	0.18426	0.08066	0.13407	0.08938	0.06320	0.46010	0.31020	0.51148	0.84856	0.29484	1.11051	1.40489	0.60571	0.03610	0.03160	0.09661	0.01310	0.19443	0.16113	0.05799	0.06543	0.17018	0.09081	0.36827	0.15442
0.09480	0.05880	0.57812	0.11394		0.41940	9.878724e-9	0.00000	0.02616	0.07741	0.02616	0.08938	0.06320	0.12595	0.16953	0.03462	0.40783	0.29158	1.44506	0.11755	0.35367	1.82771	1.51706	0.95972	0.02247	1.470247e-17	0.05474	0.02930	0.23960	0.04926	0.05803	2.192690e-18	0.16529	0.11073	0.22921	0.28284
0.07066	0.09577	0.13745	0.39455		0.15272	0.03160	0.01850	0.02267	0.16974	0.01311	0.03160	0.06557	0.07066	0.19150	0.02469	0.30168	0.29134	0.82476	0.39921	0.47156	1.11624	1.20286	1.31706	0.01414	0.02616	0.06580	0.01310	0.44501	0.03160	0.12616	0.08147	0.01466	0.10919	1.092241e-3	0.22787
0.09249	0.07066	0.11303	0.05090		0.07591	0.02930	0.00000	0.08065	0.10791	0.01850	0.12640	0.05105	0.05560	0.22434	0.04469	0.07802	0.13361	2.50971	0.14363	1.54084	1.87279	1.00683	1.82771	0.15800	0.03160	0.05918	0.03421	0.67627	0.01709	0.12647	0.11612	0.01694	0.22787	0.11849	0.32791
0.10646	0.04866	0.09272	0.09993		0.47387	0.03421	0.02267	0.01310	0.13660	0.03421	0.05923	0.01746	0.06705	0.06937	0.08066	0.10674	0.22189	3.23035	1.73958	1.50000	1.45339	1.33216	1.28294	0.19979	0.20438	0.03663	0.01853	1.01409	0.01694	0.16407	0.11612	0.02230	0.09081	0.14102	0.36824
0.14466	0.10503	0.26412	0.10082		1.33261	0.04469	0.05178	0.05010	0.16022	0.02267	0.11394	0.04469	0.03466	0.11394	0.03462	0.27432	0.18426	4.25790	1.51193	0.97033	1.82003	0.44839	1.40000	0.24802	0.24612	0.06454	0.04659	1.09471	0.02396	0.12575	0.13029	0.05140	0.09081	0.34102	0.29081
0.06320	0.04521	0.29488	0.20980		0.07566	0.08065	0.09570	0.03662	0.16575	1.978774e-17	0.11179	0.02247	0.02244	0.10247	0.01414	0.33704	0.12882	2.37056	1.12566	0.65372	0.68085	0.65372	1.27475	0.20476	0.53377	0.09313	0.03160	1.03173	0.03585	0.06461	0.14918	0.02393	0.28284	0.39569	0.21965
0.03160	0.07066	0.03689	0.14542		1.53000	0.08844	0.03160	0.04469	0.02267	3.510261e-6	0.15050	0.04469	0.03157	0.07066	0.01746	0.31323	0.17017	2.20180	1.49666	1.10125	0.66689	0.44839	1.33333	0.24066	0.60384	0.07741	1.581172e-16	1.12266	0.04854	0.09631	0.06543	0.05142	0.14202	0.44851	0.32225
0.01477	0.01361	0.34863	0.05046		0.10809	0.09583	0.06454	0.02267	0.03421	0.02267	0.14363	0.04788	0.03608	0.09480	0.04574	0.33417	0.20618	0.40000	1.50968	0.28284	0.25000	0.20000	2.13437	0.07066	0.91689	0.01310	0.06320	0.87019	0.03585	0.09993	0.03585	0.16108	0.21965	0.41103	0.27456
0.03580	0.05142	0.04609	0.16906		0.29601	0.10722	0.05923	0.01310	0.05923	0.02267	0.09908	0.05835	0.03609	0.35646	0.06557	0.46419	0.19876	1.51645	0.72083	0.40851	1.28062	0.51042	1.48933	0.01412	0.79500	0.03419	0.04470	0.45574	0.05792	0.08191	0.02240	0.16098	0.21965	0.64424	0.36608
0.05673	0.10011	0.18825	0.12687		0.27962	0.09993	0.04470	0.02267	0.03662	0.14099	0.21433	0.05560	0.04468	0.29835	0.03610	0.46953	0.32743	2.27437	1.03926	1.00050	1.13137	0.55440	2.13589	0.01406	0.55756	0.19479	0.01310	0.51828	0.11612	0.12412	0.01466	0.19565	0.20000	1.34821	0.51532
0.05063	0.03160	0.09282	0.24154		0.11414	0.08259	0.10790	0.01850	0.04838	0.18747	0.35224	0.04788	0.03610	0.13823	0.02469	0.64313	0.31600	2.23607	1.39921	0.58941	1.92215	0.91706	2.64447	0.05103	0.37082	0.22567	0.01310	0.49193	0.14918	0.09175	0.01709	0.22180	0.20000	1.06577	0.50000
0.07976	0.29113	0.32714	0.12402		0.20661	0.04470	0.18393	0.07066	0.04136	0.05010	0.39163	0.08000	0.06237	0.03462	0.07066	0.64228	0.19150	2.22450	1.41721	1.55740	4.42454	0.85660	1.97990	0.03462	0.62563	0.24198	0.05010	0.53752	0.18426	0.09992	0.01694	0.20989	0.20000	1.52323	0.30919
0.14323	0.04721	0.15973	0.13647		0.61048	0.09993	0.09659	0.03421	0.05340	0.16167	0.39274	0.06476	0.04895	0.09159	0.07802	0.56486	0.04896	2.73764	1.10561	0.80000	7.93032	0.67862	1.67799	0.03610	0.30363	0.18825	0.02267	0.57464	0.26235	0.08614	2.533784e-7	0.30248	0.09081	1.62984	0.30466
0.08605		0.03440	0.10167		1.43891	0.08759	0.07742	0.01850	0.04136	0.17400	0.31354	0.06321	0.03899	0.20477	0.05560	0.39233	0.71642	1.62482	0.40966	0.80000	8.71804	0.55440	1.45602	0.03462	0.21748	0.20687	0.01310	0.41919	0.16721	0.05792	0.03168	0.34660	0.32225	1.41432	0.28284
0.10646		9.888731e-3	0.06320		0.07418	0.01850	0.07742	0.03662	0.04469	0.30141	0.05418	0.08066	0.01780	0.09480	0.14728	0.33417	0.67627	2.00000	0.74443	0.52367	11.39898	0.20000	0.23174	0.01746	0.66327	0.05475	0.02267	0.43392	0.04469	0.02396	0.03585	0.30219	0.10919	0.56040	0.21965
		0.23391	0.22367		1.34837	0.09993	0.01853	0.01850	0.02616	0.31984	0.16402	3.319003e-3	0.06707	0.03160	0.14886	0.29086	0.68701	1.45602	0.86453	0.33798	10.70701	0.72111	0.90531	0.03610	0.62565	0.08274	0.09570	0.47505	0.02240	0.05602	0.14434	0.36699	1.788222e-7	0.50022	0.20000
		0.07268	0.10071		0.09480	0.09993	0.08938	0.10329	0.10722	0.14304	0.21467	0.07935	0.05560	0.03462	0.19150	0.30585	0.66249	1.21095	0.52367	0.90531	9.99835	0.72111	0.98932	0.03610	0.15809	0.09993	0.06454	0.45668	1.074418e-16	0.03160	0.18960	0.33103	0.21965	0.22018	0.21965
		0.20176	0.06320		0.36568	0.12505	0.01310	0.08844	0.03421	0.07066	0.22783	0.03327	2.192690e-17	0.02469	0.22787	0.53813	0.87959	1.31967	0.62708	0.80429	7.81025	0.72111	1.04513	0.03462	0.25706	0.13029	0.04470	0.38183	0.23797	0.02240	0.19036	0.04840	0.20000	0.10698	0.40000
		0.19767	0.06483		0.27269	0.10722	0.03662	0.02616	0.02267	0.03421	0.28733	0.03160	0.03160	0.01414	0.24259	0.85380	0.13442	0.40000	0.20000	1.03926	6.16393	0.84856	3.67479	0.06476	0.18426	0.13029	0.04469	0.31122	0.03160	0.03160	0.17266	0.11314	0.12842	0.14902	0.52999
		0.03591	0.08004		0.20401	0.04534	0.03160	0.19480	0.08274	0.03661	0.10677	0.01414	0.04788	0.03160	0.28075	1.05043	0.20882	0.20000	0.73124	1.00000	8.00263	1.23780	4.10569	0.01414	0.06585	0.07066	0.07742	0.27549	0.05602	0.01694	0.17266	0.09562	0.30919	0.85370	0.52999
		0.08706	0.18449		0.26506	0.09583	0.03160	0.30346	0.06585	0.03662	0.12596	0.04574	0.05835	0.03160	0.46094	0.99226	0.28111	0.44721	0.62708	2.12466	9.84677	1.19510	3.77359	0.13029	0.09993	0.06585	0.09313	0.43900	0.05602	0.03483	0.07786	0.07869	0.20000	0.77421	0.40000
		0.13315	0.16856		0.47433	0.03662	0.03662	0.32508	0.01850	0.03662	0.10220	0.05560	0.03462	0.04574	0.34789	0.91642	0.29086	0.48995	0.53015	1.37646	11.38097	0.87279	4.68188	0.09639	0.20515	0.04659	0.02267	0.42313	0.08191	8.364450e-24	0.05071	0.06417	0.22787	0.72151	0.30919
		0.09412	0.28740		1.84114	0.01417	0.01850	0.18747	0.05010	0.08065	0.19119	0.03160	0.01746	0.01746	0.25477	0.70550	0.33045	0.79206	0.37487	2.12100	12.66941	0.52097	4.94467	0.05835	0.08170	0.04838	2.940496e-17	0.39971	0.09253	0.01466	0.08403	0.03658	0.30466	1.00109	0.35294
		0.15206	0.18433		0.10526	0.03421	0.04469	0.26655	0.05340	0.04659	0.23853	0.02469	0.00000	0.00000	0.38051	0.54367	0.25679	0.86054	0.21651	0.52367	15.25003	0.80000	4.57578	0.03610	0.21233	0.01850	0.13407	0.37836	0.03160	0.03160	0.10206	0.01694	0.30466	0.85398	0.22787
		0.18884	0.06589		1.38775	0.01310	0.02616	0.03160	0.01310	0.28878	0.29926	0.03610	4.385381e-18	0.00000	0.50089	0.34181	0.15800	0.82462	0.42495	0.41678	14.33283	2.20291	3.68782	0.09585	0.22965	0.04469	0.07630	0.45934	0.05792	0.05671	0.09370	0.05096	0.09081	0.22917	0.20000
		0.05163	0.23394		0.04318	0.03662	0.01850	0.06454	0.03662	0.38790	0.41201	0.03160	0.01746	0.01414	0.54323	0.49435	0.25691	0.77021	1.00000	1.60215	11.93315	2.40143	3.72310	0.20945	0.11238	0.04659	0.26622	0.33909	0.10548	0.03483	0.16871	0.01511	0.14202	0.41579	0.20000
		0.25783	0.14614		0.47255	0.03160	0.01310	0.09659	0.01853	0.16376	0.36094	0.08938	0.02469	0.03462	0.74691	0.48980	0.21332	0.28294	1.16619	2.12649	10.27663	2.66833	3.71288	0.15896	0.10003	0.21233	0.22197	0.35588	0.06705	0.02073	0.19148	0.01730	0.22787	0.22873	0.30466
		0.06985	0.16119		0.16971	0.03662	0.03160	0.11394	0.01310	0.09659	0.24487	0.04788	0.02247	0.03160	0.61030	0.40048	0.31600	0.53015	0.56569	3.48294	9.44034	2.65811	2.64723	0.11315	0.08846	0.21230	0.24041	0.47840	0.03585	0.02073	0.26999	0.02271	0.09081	0.13711	0.22787
		0.05543	0.12776		0.23465	0.01850	0.04838	0.03662	0.04470	0.14132	0.30713	0.05105	0.01746	0.03462	0.41631	0.40391	0.39401	0.41678	0.57772	2.93075	7.30879	2.86511	2.58759	0.09639	0.09480	0.19222	0.13597	0.30942	0.01694	0.00000	0.21333	0.03560	0.12842	0.11260	0.41464
		0.18055	0.16113		0.24813	0.11394	0.03661	0.06454	0.06454	0.09993	0.40084	0.07066	0.01414	0.11394	0.26207	0.58372	0.43900	0.53015	0.44721	3.00228	5.89271	6.00925	2.70843	0.04469	0.09659	0.20645	0.19050	0.40594	0.04926	0.01694	0.29811	0.03516	0.10919	0.13840	0.40000
		0.06815	0.09480		0.64345	0.02610	0.01853	0.09570	0.06320	0.03160	0.28615	0.05835	0.00000	1.581172e-16	0.05835	0.57874	0.33013	0.00000	0.77021	2.12100	7.04557	6.45493	2.71958	0.08662	0.11244	0.20355	0.09583	0.30370	0.06705	0.00000	0.17876	0.03597	0.10919	0.33811	0.30466
		0.04969	0.23548		1.78020	0.03160	4.137161e-18	0.05923	0.18240	0.36560	0.17650	0.05105	0.02000	1.525230e-16	0.13029	0.63279	0.46628	0.16555	1.56205	0.66337	8.23650	5.83463	2.34136	0.11344	0.14132	0.04470	0.14132	0.31122	0.07968	1.754152e-18	0.15666	0.03187	0.15442	0.11244	0.21965
		0.21446	0.12770		0.01973	0.02267	0.02616	0.09993	0.17829	0.41384	0.10481	0.05207	7.455150e-18	0.03462	0.01746	0.63365	0.27528	0.14633	2.07235	1.28030	9.71612	4.60892	2.17214	0.11662	0.14765	0.01311	0.08065	0.15562	0.06488	0.00000	0.08191	0.04470	0.36824	0.04669	0.36824
		0.32439	0.11204		1.34364	0.03662	0.03662	0.05923	0.20880	0.25155	0.12505	0.03160	7.351246e-18	0.04469	0.04574	0.65252	0.27183	0.27592	2.54558	0.44721	10.62722	3.88218	2.27846	0.12251	0.07630	0.01850	0.07066	0.19986	0.06320	0.00000	0.10946	0.03658	0.15442	0.21880	0.31063
		0.04870	0.11395		0.05118	0.11394	0.01850	0.08259	0.24487	0.15901	0.39576	0.03160	0.02247	0.15407	0.05560	0.43289	0.16449	0.23911	2.69072	0.28284	12.08305	2.49702	2.18154	0.12719	0.07066	0.06454	0.11762	0.31995	0.03585	0.01466	0.05792	0.03617	0.21965	0.09578	0.35294
		0.08398	0.09165		0.47443	0.01311	0.03421	0.07066	0.22680	0.19222	0.46977	0.04788	0.02247	0.05207	0.04574	0.41080	0.18872	0.40966	2.33219	1.01980	12.48184	0.79146	2.18913	0.03160	0.06714	0.06585	0.15800	0.35330	0.11394	0.01694	0.08403	0.03471	0.27031	0.20000	0.28284
		0.26113	0.11174		0.14868	0.22345	0.03160	0.03160	0.02267	0.16113	0.22867	0.03462	0.03160	0.03462	0.06320	0.34903	0.27660	0.48995	2.48763	1.53019	10.30344	0.66337	2.47386	0.03610	0.08065	0.04469	0.10329	0.55954	0.16312	0.01466	0.11974	0.04639	0.32376	0.13154	0.54706
		0.11104	0.05841		0.29091	0.23290	0.02267	0.06320	0.03160	0.33290	0.39041	0.04574	0.01746	0.02469	0.04574	0.14132	0.07802	0.23174	3.39339	2.49235	6.98570	0.73124	2.57228	6.201865e-18	0.05474	0.02267	0.12505	0.62079	0.11612	0.02189	0.08403	0.03585	0.20325	0.13154	0.35295
		0.13287	0.11140		0.24491	0.26443	0.01310	0.09570	0.03160	0.60523	0.25314	0.05560	0.02000	0.05835	0.05835	0.11662	0.11394	0.51706	3.12363	1.00683	6.13514	0.23174	2.58759	0.03610	0.01310	0.03421	0.19449	0.54539	0.15666	0.01497	0.06320	0.02240	0.32513	0.22747	0.38829
		0.45931	0.12334		0.48610	0.29767	0.01310	0.07742	0.01850	0.80911	0.16867	0.06557	0.03610	0.02000	0.04469	0.03610	0.27755	0.41678	3.61247	0.48294	3.49285	0.60571	2.79967	0.01414	0.07066	0.03421	0.11179	0.32075	0.11612	0.04928	0.11076	0.01466	0.20732	0.14291	0.37978
		0.12131	0.07971		2.07223	0.28709	0.03160	0.04469	0.03160	0.67034	0.41602	0.01746	3.508305e-17	0.03160	0.00000	0.03610	0.33939	0.56569	3.65940	1.72047	1.23290	0.40851	3.02076	0.08355	0.06454	0.03160	0.09993	0.59623	0.06488	0.03632	0.08615	0.05600	0.32225	0.09338	0.15135
		0.01356	0.14250		0.27459	0.23888	0.03160	0.01310	0.02616	0.63398	1.31757	0.02469	0.03462	0.03160	0.05207	0.01746	0.28029	0.44721	3.11127	1.10125	0.93447	0.20000	2.97782	0.05105	0.01853	0.01853	0.13950	0.43401	0.10650	0.01744	0.07969	0.07063	0.14202	0.10968	0.25000
		0.14920	0.12750		1.01035	0.23643	0.03662	0.00000	0.05475	0.34785	1.34850	0.02247	0.02469	0.03160	0.02247	0.06476	0.29811	0.37487	3.28631	1.41421	2.71259	0.33798	3.42914	0.08001	0.01310	3.508305e-17	0.17315	0.26813	0.03585	0.01706	0.06488	0.04854	0.21965	0.10968	0.31063
		0.04407	0.09304		0.06390	0.17787	0.02616	0.09480	0.04659	0.08938	0.96324	0.02247	0.06557	0.05105	0.04469	0.17214	0.28029	0.28284	3.48490	2.20907	1.20000	0.08294	3.60260	0.07734	0.05010	0.03421	0.12775	0.63985	0.05602	0.02415	0.03483	0.05789	0.10919	0.04818	0.20000
		0.13659	0.07888		0.42269	0.25772	0.03160	0.28440	0.37572	0.12640	0.68361	0.02469	0.05560	0.07066	0.05560	0.31244	0.18426	0.14347	2.88225	2.15452	2.00998	0.32773	3.77359	0.06321	0.04838	0.05340	0.17698	0.72238	0.05602	0.02293	0.03483	0.07969	0.21965	0.04818	0.15442
		0.06135	0.20732		0.73714	0.23005	0.01310	0.22680	0.42981	0.25672	0.13407	0.03177	0.09993	0.08938	0.05835	0.34789	0.04469	0.42495	3.41670	1.98204	2.93407	0.31706	4.56508	0.06930	0.09583	0.05340	0.15331	0.39425	0.04626	0.03240	0.04626	0.04926	0.35294	0.10328	0.19303
		0.02071	0.04469		0.17982	0.08759	0.02267	0.27130	0.40220	0.44279	0.27495	0.04469	0.15713	0.15795	0.01414	0.54550	0.10986	1.49928	1.43545	2.33802	2.84082	0.00000	3.67151	0.03160	0.05178	0.03160	0.11762	0.24487	0.02396	0.03177	0.07786	0.05792	0.11504	0.20758	0.18199
		0.13002	0.11250		0.08693	0.35745	0.01310	0.09908	0.42513	0.33062	0.22197	3.310316e-3	0.15896	0.22018	0.05105	0.46090	0.27968	1.51193	0.29691	1.05409	0.78403	0.00000	3.08942	0.10229	0.07066	0.04470	0.06454	0.50820	0.06705	0.04955	0.10028	0.05792	0.04061	0.20758	0.18199
		0.04052	0.04898		0.27594	0.25276	0.01310	0.04838	0.43906	0.17930	0.23643	0.07066	0.12251	0.09993	0.04469	0.60041	0.49423	1.34639	0.79051	2.20072	1.66370	0.32773	1.26491	0.02420	0.03421	0.04470	0.07630	0.39971	0.16422	0.06555	0.06488	0.07966	0.04061	0.20000	0.19303
		0.07713	0.17323		0.56784	0.12514	0.03421	0.15854	0.15331	0.15331	0.07741	0.04906	0.12595	0.05835	0.05835	0.37876	0.52070	1.28030	0.99676	2.34637	0.72111	0.11729	2.52982	0.06465	0.12640	0.08941	0.17876	0.44399	0.27639	0.01451	0.05602	0.14846	0.18184	0.20000	0.10919
		0.01116	0.08408		1.90637	0.10791	0.02616	0.16634	0.15908	0.14823	0.27495	0.04469	0.09272	0.09639	0.08355	0.21913	0.37396	1.79104	0.94508	1.92747	1.11803	0.51063	2.08806	0.04899	0.18240	0.07742	0.22680	0.68235	0.17017	0.02553	0.07066	0.15799	0.10596	0.11015	0.10919
		0.05487	0.07968		0.19493	0.05340	3.403971e-17	0.18960	0.32226	0.12775	0.06454	0.03462	0.05835	0.14050	0.07734	0.17602	0.44630	0.30620	0.34963	2.03961	0.36086	0.19549	1.55582	0.08349	0.18426	0.07630	0.28440	0.83336	0.29811	0.02501	0.03386	0.03585	0.49081	2.535070e-9	0.09081
		0.13476	0.12721		0.99942	0.05010	0.03160	0.01310	0.30942	0.33783	0.22164	0.02000	0.08252	0.22765	0.07066	0.19150	0.26927	0.53015	1.06175	1.61245	7.71570	1.00951	1.52069	0.05211	0.28615	0.08065	0.28470	0.57294	0.23375	0.02354	0.07923	0.13463	0.36824	3.970077e-10	0.20000
		0.09995	0.08945		0.03991	0.08259	0.05474	0.03160	0.32226	0.44353	0.18426	0.07802	0.04896	0.07066	0.05207	0.20653	0.09480	0.65372	0.67052	0.34649	6.82511	0.89633	3.93411	0.11433	0.53813	0.04469	0.23430	0.42508	0.07832	0.03245	0.06863	0.11625	0.36824	1.234511e-8	0.22787
		0.11373	0.02153		0.62250	0.03662	0.01853	0.05178	0.41101	0.33599	0.25796	0.05207	0.06707	0.08355	0.01746	0.04906	0.21027	1.31706	2.80830	0.77021	7.09173	0.91706	0.56330	0.11446	0.32962	0.11318	0.22345	0.22345	0.07066	0.03482	0.03585	0.19229	0.40000	1.169784e-8	0.21965
		0.06749	0.17288		1.51365	0.01310	0.03160	0.01850	0.30942	0.26778	0.27734	0.04906	0.02247	0.04469	0.09993	0.17740	0.28640	1.81108	1.60078	0.11706	7.88107	1.54984	0.64633	0.13428	0.27161	0.10667	0.14830	0.17829	0.06543	0.05789	0.05071	0.18006	0.12842	0.09637	0.28284
		0.07048	0.18426		0.14288	0.05475	0.01310	0.01850	0.01310	0.13029	0.40468	0.04896	0.08662	0.06476	0.05560	0.21332	0.28997	2.93907	1.11051	0.11729	7.59331	1.01980	0.56569	0.14710	0.24789	0.22190	0.11897	0.28260	0.08403	0.05791	0.03160	0.09616	0.63246	0.09637	0.14202
		0.08245	0.10529		0.20078	0.05340	0.04596	0.05340	0.08844	0.07066	0.24066	0.07802	0.06476	0.19013	0.07066	0.20477	0.28997	3.79372	2.03508	0.44721	10.14371	1.13483	0.56569	0.17940	0.08187	0.28235	0.13029	0.30084	0.03585	0.04854	0.03483	0.03154	0.51723	0.20000	0.09081
		0.09029	0.12933		0.07409	0.06585	0.09864	0.01310	0.44627	0.17161	0.25903	0.03610	0.07929	0.16953	0.03160	0.25752	0.12965	3.90596	0.72111	0.21651	8.50923	1.01980	0.82462	0.11825	0.19480	0.25235	0.23290	0.20892	0.07786	0.01465	0.04469	0.01695	0.40000	0.22033	0.14202
		0.03105	0.02321		0.39866	0.03160	0.02630	0.05010	0.38221	0.08274	0.35119	0.04574	0.03462	0.13823	0.18902	0.28328	0.49845	3.79062	2.49098	0.34649	7.50695	0.52271	0.21651	0.12250	0.05927	0.10771	0.26778	0.17400	0.07066	0.02241	0.05792	0.03479	0.85122	0.28284	0.10919
		0.04107			2.09290	0.03421	0.02630	0.01310	0.32859	8.274321e-18	0.36882	0.01414	0.03160	0.12882	0.14491	0.20945	0.69022	2.00998	1.96977	0.33798	6.86476	1.14342	3.49538	0.12445	0.10790	0.15788	0.19611	0.11762	0.05792	0.03585	0.11174	0.03159	1.04207	0.28284	0.10919
		0.09536			0.15203	0.11897	0.05958	0.01417	0.35959	0.05178	0.10722	0.02000	0.01414	0.07802	0.15863	0.24074	0.61024	0.00000	2.60768	0.52271	6.48962	0.79206	6.98368	0.09982	0.07741	0.03335	0.21048	0.02267	0.07066	0.03160	0.10650	0.05791	0.82932	0.31205	1.546576e-8
		0.07463			1.21046	0.22087	0.03374	0.06585	0.40834	0.18960	0.18426	0.03462	0.03177	0.09988	0.02247	0.23599	0.57503	1.26491	3.83502	0.67862	5.45079	0.62708	7.72460	0.06708	0.12708	0.02065	0.26778	0.06714	0.03160	0.01694	0.03483	0.01474	0.81816	0.29010	1.678718e-8
		0.05668			0.15793	0.30832	0.02242	0.01853	0.07066	0.17698	0.14823	0.04469	0.02000	0.02469	0.13048	0.18132	0.36030	2.04845	2.72441	0.52271	6.24196	0.63246	10.32473	0.06322	0.12640	0.03382	0.36993	0.03160	0.04853	0.02396	0.01694	0.07823	0.88417	0.09075	0.10919
		0.17717			0.68136	0.34468	0.07855	2.840698e-17	0.01850	0.16113	0.20234	0.08355	0.02000	0.01414	0.06557	0.04896	0.19192	3.12363	2.76582	0.82462	6.27523	0.60653	11.32961	0.10968	0.14765	0.01342	0.20810	0.15331	0.03585	0.04926	0.03160	0.07377	0.07101	0.19899	0.10919
		0.07621			0.11377	0.14773	0.15875	0.01310	0.01310	0.15908	0.29134	0.07865	0.02247	0.04906	0.12235	0.13555	0.25783	2.56056	2.45209	0.66337	5.72713	0.74443	8.43090	0.11395	0.10870	0.08844	0.32936	0.03421	0.03483	0.01694	0.06543	0.01476	0.16996	0.31370	5.807065e-9
		0.14609			0.27908	0.10329	0.20262	0.03662	0.03662	0.10790	0.08065	0.03610	0.02469	0.03610	0.22787	0.23601	0.30073	3.68179	2.37384	0.69299	5.01597	0.51042	6.72130	0.15800	0.12708	0.11394	0.36118	0.12973	0.02396	0.01694	0.13619	0.01477	0.31570	0.29067	0.10919
		0.03099			0.08458	0.03662	0.23510	0.05340	0.18426	0.03160	0.12973	0.03610	0.03160	0.03610	0.29134	0.27183	0.58150	0.19510	1.64924	0.68085	5.42973	0.44721	7.91959	0.10247	0.06320	0.12516	0.36882	0.23399	0.09630	0.01694	0.06710	0.03172	0.56524	0.49899	0.10919
		0.07787			0.43899	0.15646	0.19039	0.03421	0.13407	0.05923	0.08759	0.06557	0.04469	0.03610	0.36791	0.26386	0.63594	0.28968	2.60864	1.10561	5.11506	0.60000	9.22790	0.10526	0.06320	0.08938	0.25772	0.25776	0.07065	0.02396	0.07271	0.04472	0.60985	0.42705	0.10919
		0.20484			1.95114	0.11388	0.20325	0.01853	0.09480	0.02616	0.27193	0.01415	0.16687	0.03462	0.49227	0.20604	0.65068	0.33798	2.33346	0.55902	5.50788	0.08294	11.20877	0.06320	0.12514	0.03160	0.26567	0.16113	0.14435	0.02240	0.08615	9.682372e-3	0.67478	0.36269	0.10919
		0.11342			0.14732	0.15752	0.21878	0.03421	0.06585	0.03160	0.43055	0.04471	0.05835	0.03610	0.41802	0.20754	0.70521	1.20286	3.57880	1.26491	4.00524	0.84853	11.19799	0.03462	0.06585	0.04838	0.29429	0.31627	0.10946	0.01694	1.491029e-17	0.01466	0.54813	0.41183	0.13649
		0.07659			1.29079	0.10805	0.28537	0.05475	0.03421	0.01850	0.51722	0.02469	0.05560	0.04906	0.34585	0.09893	0.77395	0.69290	3.73631	1.07433	4.21010	0.66337	8.71398	0.03462	0.08274	0.22345	0.26443	0.55392	0.03166	2.828486e-17	1.549846e-17	0.07844	0.46595	0.51569	0.18199
		0.09792			0.11097	0.12989	0.32292	0.19222	0.06322	0.01850	0.55919	0.01746	0.06320	0.10247	0.02247	0.04586	0.68156	0.53015	4.23299	1.70880	4.65138	0.44721	6.83520	0.06320	0.02267	0.22344	0.26286	0.44235	0.11347	0.02240	0.05792	0.05609	0.28744	0.20000	0.47140
		0.07604			0.43612	0.18825	0.33149	0.22345	0.04838	0.06585	0.56228	0.03610	0.05105	0.13361	0.06707	0.07066	0.50496	0.28284	2.97321	1.12318	3.18826	0.67862	2.79480	0.15863	0.03662	0.19222	0.23539	0.41384	0.10602	0.04718	0.01694	0.08955	0.26038	0.09761	0.38082
		0.43225			1.02035	0.18805	0.29977	0.19222	0.07066	0.01310	0.44353	0.03610	0.07066	0.28346	0.25691	0.54875	0.51607	0.72111	2.34136	1.34639	2.65367	0.60653	2.08806	0.20779	0.04469	0.12640	0.16570	0.35588	0.21557	0.03505	0.02240	0.09029	0.30919	0.13893	0.41018
		0.08743			0.04068	0.09831	0.32185	0.22680	0.01853	0.01850	0.30852	0.09157	0.01414	0.25833	0.31632	0.77589	0.45700	0.20000	1.72105	1.26800	3.34636	0.28284	2.75380	0.20618	0.01310	0.19222	0.10948	0.19986	0.17323	0.03460	0.03585	0.06552	0.43726	0.09848	0.44721
		0.26675			0.10916	0.06514	0.16619	0.17698	0.03160	0.05475	0.28264	0.05835	0.04906	0.22787	0.27028	0.92852	0.70343	0.16555	1.18574	0.72111	1.27302	0.62708	1.34639	0.15863	0.07742	0.03661	0.04470	0.03160	0.06319	0.03008	0.05792	0.04854	0.44721	0.23057	0.41018
		0.22523			0.05352	0.03748	0.09993	0.06714	0.05475	0.08259	0.39394	0.03903	0.04469	0.16905	0.28806	0.90792	0.75627	0.41678	0.60571	1.00000	1.55740	0.37487	4.95177	0.11314	0.04469	0.02616	0.17017	0.08938	0.04805	0.01511	0.13674	0.09595	0.49914	0.22399	0.30466
		0.06844			0.46071	0.04664	0.07323	0.03662	0.04838	0.06842	0.59623	0.03609	0.02469	0.10247	0.09585	0.84536	0.99351	0.41678	0.72111	1.16619	2.34076	0.20000	4.40078	0.11344	0.04469	0.02267	0.28500	0.24198	0.09235	0.01469	0.05141	0.15066	0.41018	0.22399	0.32791
		0.50737			0.06522	0.08758	0.05916	0.08170	0.01310	0.17843	0.47707	0.06715	0.04469	0.03462	0.27082	0.37752	1.10399	0.41678	1.01980	0.77086	2.72029	0.70752	6.25171	0.09988	0.06320	0.04469	0.19050	0.39041	0.10142	0.01677	0.07066	0.08985	0.30466	0.14391	0.14202
		0.18408			1.53480	0.09999	4.733555e-4	0.04469	0.06585	0.13031	0.36447	0.08937	0.03610	0.23746	0.26751	0.51933	1.12977	0.00000	0.90531	2.68328	4.09273	0.43311	9.33537	0.03610	0.05474	0.02616	0.22159	0.38934	0.12972	0.01463	0.05792	0.07835	0.09081	0.20079	0.10919
		0.37221			0.08674	0.10019	0.03655	0.03160	0.07742	0.08274	0.24177	0.12235	0.00000	0.46631	0.23975	0.63836	0.75991	0.11706	1.33216	3.98852	3.41217	0.38623	7.19382	0.01746	0.15800	0.04469	0.14132	0.35734	0.03118	0.05114	0.09253	0.04473	0.12842	0.11046	0.14202
		0.14255			0.93566	0.08341	0.04825	0.05340	0.09483	0.08938	0.14823	0.12593	0.03160	0.54323	0.44263	0.87800	0.68606	0.23174	1.52315	5.21536	1.88680	1.43423	7.37529	0.05207	0.06714	0.05474	0.09993	0.24789	0.09183	0.08426	0.17266	0.01465	0.15442	0.10098	0.09081
		0.11671			0.11698	0.07060	0.02276	0.03662	0.07852	0.05923	0.03421	0.12122	0.01414	0.68068	0.30073	1.27566	0.51516	0.56569	2.15407	5.12250	1.30666	0.76414	7.69810	0.24066	0.06320	0.06320	0.10948	0.22835	0.09996	0.17067	0.10028	0.03159	0.22787	0.10098	0.14202
		0.36366			0.13170	0.09995	0.05918	0.01850	0.08843	0.07066	0.03160	0.08361	2.192690e-18	0.71652	0.23746	1.41510	0.66660	0.11729	1.20004	5.38145	1.77271	0.74443	7.20556	0.22120	0.07066	0.07742	0.15854	0.15164	0.14844	0.09234	0.07969	0.01461	0.10919	0.14089	0.09081
		0.19316			0.24290	0.06721	0.03434	0.02267	0.14764	0.06320	0.04470	0.08938	0.03160	0.41080	0.25477	1.01153	0.51627	0.21651	1.16619	4.56508	0.82462	0.20000	6.33819	0.14455	0.13407	0.07741	0.28789	0.24487	0.31709	0.15008	0.13460	3.469310e-5	0.22787	0.11046	0.21965
		0.38931			0.55143	0.07122	0.04469	3.157474e-17	0.09993	0.03160	0.18426	0.06469	0.08355	0.17017	0.48235	1.08076	0.44958	1.69706	1.00000	4.64581	1.13483	0.08294	2.61721	0.17017	0.06320	0.07066	0.25314	0.30454	0.35026	0.14379	0.04469	9.005090e-5	0.22787	8.876271e-9	0.10919
		0.24015			0.19750	0.07763	0.03650	0.03421	0.14072	0.04469	0.09993	0.06706	0.08938	0.04906	0.45155	1.09820	0.42981	0.65372	0.88294	3.20489	2.15407	0.89443	2.03961	0.17502	0.15800	0.04838	0.22345	0.34785	0.30297	0.04458	0.06488	0.06709	0.09081	0.10275	0.14202
		0.22469			1.71381	0.04475	0.05436	0.05178	0.14830	0.01310	0.09570	0.05560	0.09993	0.11360	0.65634	1.05686	0.43539	0.44721	0.44721	3.37828	2.55726	0.67862	2.60768	0.11662	0.09993	0.04679	0.14433	0.23888	0.23643	0.02244	0.08191	0.01694	0.14202	0.12784	0.15442
		0.35542			0.21224	0.09949	0.01292	0.05923	0.21748	0.03421	0.02616	0.01414	0.11344	0.07066	0.44912	1.12965	0.19010	0.80000	1.01980	2.16220	2.93907	0.53015	4.12679	0.03462	0.10722	0.09494	0.25483	0.22087	0.19148	0.03525	0.10206	0.02241	0.14202	0.09127	0.10919
		0.38533			0.99422	0.07707	0.05318	0.05474	0.38051	0.12169	0.17829	0.01414	0.06476	0.21649	0.60564	1.50461	0.14162	0.60000	1.18652	1.18652	3.47340	0.49692	5.13925	0.04469	0.05010	0.04659	0.56463	0.11244	0.18940	0.05830	0.03160	0.02241	1.914178e-7	0.23896	0.28284
		0.22559			0.18416	0.05348	0.01326	0.09570	0.23467	0.10329	0.31600	0.01414	0.04574	0.15643	0.30772	1.47758	0.12447	0.58941	1.11624	0.52271	2.99188	0.37487	8.04766	0.08252	0.03160	0.05474	0.67656	0.07066	0.06543	0.14864	0.01694	0.06320	0.09081	0.14236	0.12842
		0.27565			0.11641	0.03666	0.05905	0.08938	0.24268	0.09659	0.15164	0.04575	0.03655	0.28806	0.20551	1.49859	0.03160	0.89443	0.77021	0.89443	1.28294	0.55440	8.69213	0.01414	0.03421	0.03160	0.87215	0.03421	0.10206	0.20092	0.04854	0.09993	0.10919	0.20000	0.15442
		0.29469			0.28847	0.06668	0.03112	0.05923	0.23580	0.06714	0.09480	0.07929	3.310367e-3	0.28860	0.27140	1.24403	0.05105	0.34649	0.82462	0.52367	1.18652	0.67862	5.42973	0.02247	0.03662	0.05210	0.65050	0.14132	0.07969	0.14106	0.07066	0.06488	0.18254	0.11167	0.21965
		0.30634			0.46091	0.03651	0.08129	0.08274	0.08938	0.03421	0.10722	0.11314	3.310342e-3	0.26881	0.16333	1.42513	0.19175	0.53015	0.51706	0.25000	0.95972	0.28294	3.16228	0.05207	0.00000	0.05498	0.55640	0.16619	0.03160	0.13426	0.08615	0.06322	0.21191	0.11167	0.28284
		0.27527			0.05492	0.06585	0.09217	0.23005	0.18066	0.04659	0.28878	0.14455	0.04896	0.10894	0.06557	1.04328	7.455148e-17	1.84391	0.78385	0.74536	1.33216	0.21651	4.12925	0.03160	5.227781e-24	0.01311	0.47418	0.09583	0.01467	0.11167	0.11393	0.04926	0.38206	2.301917e-9	0.35294
		0.26999			1.55096	0.04458	0.08965	0.13660	0.06320	0.01310	0.44987	0.17214	0.04896	0.17546	0.04574	0.75478	7.637240e-17	0.68294	0.96286	0.57748	0.74443	0.31706	3.76882	0.03610	0.02267	0.02267	0.39087	0.12514	0.11270	0.11267	0.09993	0.01466	0.50281	2.278193e-8	0.40000
		0.08383			0.14474	0.16859	0.11255	0.10481	0.06322	0.15854	0.56874	0.14386	0.06320	0.04906	0.04469	0.47425	0.06476	1.53150	5.92780	0.25000	2.78568	0.23174	4.77189	0.04574	0.01850	2.631594e-17	0.49820	0.04838	0.06487	0.01693	0.10946	0.01466	0.44721	7.945870e-10	0.20000
		0.15077			1.06796	0.25861	0.11394	0.13029	0.09908	0.18960	0.40821	0.10247	0.05560	0.16687	0.21624	0.33814	0.07929	1.61640	5.65163	0.80852	2.53620	0.08294	5.46045	0.03160	0.02616	0.01314	0.54550	0.02267	0.07968	0.03157	0.12414	0.02240	0.36824	0.14449	0.28284
		0.41358			0.22551	0.24573	0.05923	0.13407	0.22345	0.23430	0.48687	0.06707	0.04574	0.34071	0.17546	0.30052	0.04469	1.81700	5.60664	1.07703	2.20311	0.16555	5.04574	0.09440	0.02267	0.01850	0.48813	0.03662	0.20478	0.03160	0.11334	0.03160	0.44721	0.09857	0.14202
		0.05484			0.13169	0.11244	0.07851	0.12514	0.17017	0.26567	0.33519	0.11394	0.02247	0.42396	0.21867	0.32538	0.01414	1.00050	4.22976	0.71162	1.42830	0.14347	3.51901	0.07066	0.04470	0.02616	0.51767	0.09993	6.095339e-6	0.07065	0.02240	0.03488	0.28284	0.09856	0.11351
		0.28240			0.26999	0.17546	0.06714	0.05178	0.17110	0.16113	0.03664	0.12719	0.00000	0.39474	0.22223	0.32400	0.03160	0.72111	6.45156	0.62708	2.20156	0.14347	4.07922	0.12760	0.03662	0.08759	0.48132	0.08259	0.14669	0.07968	0.01466	0.02241	0.41018	0.20000	2.577628e-8
		0.09431			0.58623	0.12774	0.07741	0.23643	0.17643	0.23970	0.14301	0.11394	0.03610	0.50429	0.28346	0.29156	0.05835	2.71706	6.30849	0.40000	1.34639	0.14347	4.14400	0.09480	0.04469	0.07741	0.36030	0.13216	0.12561	0.06467	2.192690e-18	0.03160	0.12842	0.29854	0.15135
		0.42526			0.07709	0.03661	0.07741	0.26999	0.18194	0.38652	0.37801	0.07802	0.04469	0.35255	0.28832	0.05992	0.02247	1.41421	6.39191	0.33798	0.95255	0.20000	2.33219	0.04469	0.03662	0.06454	0.42731	0.22345	0.07957	0.05795	0.16312	0.03585	0.12842	0.22677	0.27456
		0.07528			1.31124	0.05013	0.01850	0.29134	0.14012	0.11342	0.55196	0.07802	0.02247	0.22512	0.27820	0.04906	0.06476	1.86340	4.90475	0.93498	0.11706	0.14347	0.95972	0.04896	0.06585	0.11762	0.37543	0.19005	0.22492	0.08614	0.14132	0.03160	0.09081	0.22731	0.30466
		0.25027			0.17133	0.04470	0.01853	0.27313	0.14010	0.23467	0.49837	0.12122	0.04469	0.13113	0.36987	0.62802	0.06557	2.05913	5.74950	0.90907	0.75295	0.11729	1.96088	0.05835	0.02616	0.09313	0.44235	0.09993	0.10945	0.03160	0.14846	0.01690	0.14202	0.19999	0.20000
		0.34703			0.51052	0.03421	0.02267	0.25280	0.06448	0.24177	0.49857	0.03610	0.03160	0.15473	0.33778	1.03511	0.05207	1.20570	2.40832	0.67862	0.16555	0.11729	1.63111	0.04788	0.03160	0.06454	0.33091	0.09993	0.12798	0.05072	0.12838	0.08191	0.43726	0.28283	0.32225
		0.03307			0.12406	0.03658	2.192690e-18	0.08212	0.06320	0.11394	0.29590	0.03462	0.03610	0.16042	0.23975	1.08113	0.03610	1.21655	1.28062	0.40851	1.35684	0.21651	0.37487	0.04469	0.02267	0.06320	0.42293	0.13660	0.14946	0.03166	0.14846	0.04626	0.21965	0.32120	0.32225
		0.15929			0.23342	0.10722	0.10481	0.08199	0.15854	0.10329	0.19480	0.03462	0.04469	0.07802	0.19222	0.57572	0.04906	2.50483	2.64447	0.28294	1.41421	0.30620	1.33216	0.02469	0.05475	0.08259	0.43221	0.12708	0.04829	0.03160	0.04854	0.03160	0.22787	0.44757	0.29081
		0.29404			0.21654	0.07064	0.08844	0.07905	0.09979	0.17110	0.03160	0.03462	0.02247	0.07929	0.16544	0.47769	0.05835	1.16619	4.56840	0.71162	1.60428	0.23174	1.78176	0.11175	0.06070	0.17698	0.46108	0.03160	0.04382	0.05602	0.17017	0.01694	0.43726	0.40450	0.22787
		0.28161			0.50966	0.11393	0.09993	0.06326	0.10323	0.39971	0.07630	0.01414	0.26673	0.11394	0.07066	0.13029	0.06707	2.60936	3.25576	0.89066	1.09590	0.14347	2.27588	0.09988	0.01853	0.13413	0.27098	0.13660	0.03070	0.02240	0.21097	0.03160	0.21965	0.13813	0.22787
		0.08614			0.21081	0.03662	0.13597	0.05624	0.14125	0.45713	0.06320	0.05207	0.18045	0.03610	0.08662	0.43828	0.08986	2.21041	4.88703	0.40000	0.74443	0.23174	2.77040	0.04788	0.01853	0.29050	0.33570	0.15800	0.04420	0.04469	0.20496	0.03484	0.14202	0.14895	0.22787
		0.11433			1.00602	0.07851	0.12388	0.03489	0.14642	0.16113	0.05475	0.04788	0.19382	0.01746	0.04906	0.54827	0.15875	2.94635	3.82099	0.41678	0.60571	0.31706	1.28062	0.02247	0.01417	0.19442	0.26443	0.08759	0.06629	0.05791	0.17061	4.385381e-18	0.22787	0.21762	0.22787
		0.41276			0.06840	0.02616	0.24066	0.06982	0.14381	0.15901	0.19228	0.03610	0.12235	0.02469	0.07863	0.25833	0.09988	0.69299	2.26235	0.40013	1.21697	0.28294	1.63111	0.07066	0.06320	0.20687	0.20234	0.24066	0.04795	0.04634	0.15664	6.578071e-18	0.20000	0.22849	0.15442
		0.12516			1.09505	0.03662	0.18426	0.06200	0.12101	0.37956	0.26152	0.09159	0.15800	0.01746	0.03610	0.33425	0.06557	4.91831	0.92716	0.40851	1.49928	0.41678	1.00000	0.01746	0.06320	0.20234	0.14132	0.14363	0.01692	0.04455	0.06543	0.01469	0.20000	0.08859	0.20000
		0.20815			0.18026	0.05010	0.14765	0.03109	0.07742	0.14099	0.26877	0.05560	0.10526	0.03462	0.06320	0.32991	0.05835	1.31909	0.80852	0.49692	1.23804	0.82462	1.37646	0.03462	0.05010	0.22783	0.15646	0.10481	0.05155	0.05214	0.04469	0.03485	0.10919	0.31141	0.20000
		0.22865			0.12911	0.05475	0.12505	0.04973	0.01310	0.10680	0.10722	0.13559	0.04788	0.01414	0.03610	0.29621	0.08252	1.19069	1.60428	0.32773	1.71507	0.44721	2.15407	0.04574	0.02267	0.16419	0.12514	0.12514	0.15832	0.04939	0.06488	0.04853	0.21965	0.21919	0.14202
		0.32403			0.52431	0.07066	0.11244	0.07020	0.01850	0.29767	0.03160	0.07802	0.01414	0.01746	0.02247	0.45574	0.02247	1.59972	1.52157	0.20000	1.03926	0.34649	0.91706	0.09585	0.01853	0.06323	0.16376	0.05923	0.05556	0.02220	0.03483	0.03160	0.14202	0.10299	0.10919
		0.17093			0.63923	0.03160	0.09993	0.03414	0.09570	0.36030	0.12708	0.10247	0.11662	0.16905	0.03610	0.33908	0.07863	1.82771	0.53015	0.11706	0.41678	0.37487	2.31391	0.07066	0.03160	0.03662	0.13216	0.04469	0.05062	0.09206	0.09593	0.04470	0.09081	0.09694	0.20000
		0.39099			0.85739	0.05923	0.09583	0.05474	0.05475	0.41549	0.20313	0.03160	0.07734	0.20234	0.08189	0.20653	0.07929	2.17929	0.90907	0.29484	0.76414	0.14347	1.49636	0.07863	0.05178	0.10481	0.10870	0.01310	0.03148	0.04693	0.03483	0.05140	1.768905e-8	0.22950	0.10919
		0.25012			0.02908	0.08274	0.08938	0.04835	0.03662	0.09570	0.26152	0.01746	0.06320	0.18902	0.03462	0.31305	0.10986	1.21655	1.37082	0.28284	0.74536	0.08294	0.48294	0.02000	0.02267	0.12545	0.09480	0.17546	0.03157	0.04315	0.08147	0.05069	0.20000	0.20000	0.22787
		0.11908			1.03230	0.06454	0.14765	0.04659	0.04469	0.09128	0.01850	0.07863	0.04906	0.03610	0.05835	0.33244	0.04469	1.70656	0.96932	0.32773	0.74536	1.20004	0.56569	0.03610	0.03421	0.20064	0.10791	0.05923	0.17349	0.05602	0.07066	0.05077	1.587670e-8	0.10318	0.15442
		0.32848			0.35736	0.08938	0.13407	0.05178	0.11394	0.09659	0.09313	0.01414	0.08252	0.08000	0.06557	0.18960	0.20424	1.01980	0.37487	0.08294	0.61244	0.20000	0.69290	0.09272	0.03662	0.07632	0.06454	0.05340	0.02073	0.04469	0.04853	0.06488	0.30919	0.10318	0.12842
		0.19227			0.18734	0.03421	0.10329	0.04469	0.15908	0.03421	0.14773	0.04469	0.04574	0.16333	0.08662	0.43289	0.19175	1.26491	0.11706	0.51042	0.44721	0.08294	0.28294	0.08355	0.02616	0.28899	0.09993	0.07066	0.10026	0.03483	0.14455	0.04628	0.14202	0.10318	0.20000
		0.18312			0.42240	0.06320	0.04469	0.03662	0.11897	0.30832	0.13407	0.03462	0.11344	0.31020	0.03610	0.58094	0.36992	0.71162	1.28030	0.28284	0.67862	0.52367	2.77849	0.16449	1.393006e-17	0.36970	0.16867	0.06320	0.05602	0.03483	0.06320	0.01465	0.14202	0.08859	0.22787
		0.11385			0.61229	0.08065	0.07066	0.05338	0.13407	0.09908	0.19480	0.05559	0.10526	0.21793	0.04574	0.64764	0.32534	1.18652	1.33439	1.16619	0.32773	1.45602	2.69315	0.11948	0.09659	0.03160	0.03421	0.06714	0.10650	0.00000	0.11270	0.01464	0.14202	0.22202	0.14202
		0.62443			0.72193	0.07066	0.05340	0.05340	0.11394	0.03421	0.34903	0.02248	0.03609	0.20477	0.11360	0.42714	0.46977	0.20000	1.97623	0.80429	0.20000	3.20489	3.46215	0.13029	0.06454	0.25504	0.06585	0.09993	0.09627	0.03160	0.09480	0.01456	0.28284	0.28859	0.32225
		0.22207			0.20118	0.06454	0.08376	0.03662	0.09480	0.02267	0.34809	0.04899	0.06555	0.13632	0.08662	0.54074	0.49476	0.51042	1.66667	1.16619	0.11706	3.24107	4.06885	0.04574	0.02616	0.37682	0.04470	0.13407	0.10028	0.07969	0.05792	0.02394	0.20001	0.40981	0.22787
		0.20886			1.16226	0.07851	0.06585	0.05340	0.08065	0.06320	0.24268	0.06476	0.06875	0.21867	0.08662	0.48235	0.56201	0.44721	1.68298	1.67362	0.40851	3.95285	4.93077	0.04469	0.04470	0.28835	0.04838	0.15331	0.06488	0.03483	0.04926	0.03160	0.12837	0.40981	0.10919
		0.50470			0.51527	0.08274	0.05923	0.03421	0.05475	0.01853	0.25348	0.04791	0.05834	0.07863	0.06557	0.44298	0.51148	0.14347	1.33401	1.78885	0.56569	4.46125	4.37375	0.02469	0.05340	0.25431	0.10791	0.14649	0.07066	0.11612	0.04853	0.03585	0.09080	0.32463	0.12842
		0.20548			0.29397	0.03160	0.04470	0.01310	0.14132	0.07741	0.22356	0.03466	0.09991	0.26881	0.16492	0.49741	0.20706	0.42495	0.84856	0.60653	0.60000	1.79055	4.89519	0.03160	0.04470	0.29138	0.10481	0.14765	0.05141	0.03483	0.03497	0.17935	0.21965	0.22803	0.11351
		0.10251			0.49256	0.06320	0.03160	0.02267	0.01850	0.18426	0.20114	0.04896	0.08662	0.22345	0.23975	0.73072	0.15800	0.67862	1.16119	0.84853	0.44721	1.92624	5.69680	4.385381e-18	0.03662	0.14363	0.13407	0.18240	0.03160	0.04469	0.04469	0.17553	0.21965	0.22878	0.15135
		0.02509			0.71613	0.02267	0.05923	0.01310	0.05475	0.22087	0.24789	0.03610	0.06557	0.17214	0.29854	0.53813	0.20604	0.80000	0.48995	0.99024	0.41678	1.57977	6.01771	0.05105	0.05010	0.08376	0.04469	0.07066	0.06488	0.05141	0.04926	0.18095	0.21967	0.10318	0.47140
		0.50280			0.44082	0.01310	0.04838	0.05010	0.02267	0.34588	0.40594	0.02469	0.07863	0.25477	0.39373	0.53914	0.27755	0.80852	0.44721	0.86453	0.80000	1.93203	4.72017	0.03610	0.02267	0.50316	0.11762	0.05781	0.04626	0.02240	0.06320	0.17716	0.19998	0.10318	0.35355
		0.23307			0.05700	0.17017	0.05923	0.08844	0.09659	0.25053	0.43308	0.05835	0.06320	0.54090	0.53748	0.35683	0.43900	0.86054	0.58941	0.79206	0.67862	1.20570	5.09117	0.04469	0.09993	0.19442	0.05178	0.10804	0.04853	0.07066	0.05792	0.14182	0.15442	0.14891	0.28284
		0.46018			1.18125	0.13216	0.03662	0.05475	0.10870	0.23888	0.56379	0.04469	0.06476	0.24300	0.41864	0.19222	0.56262	0.51706	0.71162	0.89443	0.79206	0.93862	3.62648	0.04469	0.04838	0.23643	0.04838	0.42859	0.01694	0.06320	0.04533	0.03483	0.28284	0.14528	0.21965
		0.52053			0.43201	0.20685	0.05340	0.07066	0.12640	0.25672	0.60818	0.03609	0.15095	0.14442	0.31161	0.04469	0.55906	0.48995	1.00050	0.44839	0.89443	0.93862	3.53836	0.03462	0.02267	0.70830	0.01853	0.34586	0.03160	0.09056	0.03585	0.13029	0.35293	0.28329	0.21965
		0.45337			0.45325	0.25476	0.06515	0.05475	0.15800	0.12169	0.64213	0.08355	0.09440	0.19222	0.50110	0.16544	0.70596	0.21651	1.06751	0.21651	0.52367	0.90907	3.70486	0.02247	0.03160	0.45550	0.01853	0.50011	0.01466	0.09993	0.08014	0.19035	0.31063	0.19820	0.09081
		0.26957			0.36924	0.25470	0.03662	0.03160	0.15854	0.05010	0.53998	0.01414	0.06320	0.42160	0.55910	0.09988	0.67716	0.23174	0.42495	0.30620	0.52367	0.48995	4.72628	0.05207	0.03421	0.50210	0.12640	0.57464	0.03160	0.07066	0.12753	0.12725	0.41464	0.29060	0.09081
		0.04818			0.68572	0.08945	0.04634	0.07066	0.22197	0.05474	0.52789	0.04906	0.08662	0.59365	0.60784	0.05560	0.53592	0.40851	0.56569	0.40000	1.53594	1.80000	5.56147	0.14054	0.04470	0.60559	0.06320	0.37455	0.03483	0.08938	0.23005	0.10028	0.44721	0.30748	0.14202
		0.58640			0.38701	0.13032	0.06497	0.04469	0.21048	0.07741	0.29918	0.04896	0.01746	0.56898	0.79827	0.06320	0.48311	0.80429	0.73923	0.30620	1.34164	1.48755	7.54596	0.13029	0.04470	0.73038	0.05475	0.20034	0.04626	0.08014	0.26058	0.04469	0.10919	0.21332	0.14202
		0.17528			0.02504	0.06449	0.09313	0.14649	0.25477	0.12973	0.17161	0.06316	0.07066	0.90881	0.83881	0.08189	0.38195	0.86054	0.44721	0.49001	1.30666	1.40000	7.97852	0.18960	0.08938	0.61271	0.04838	0.30757	0.09593	0.09993	0.19297	0.06865	0.21963	0.31344	0.10919
		0.40625			0.88287	0.09479	0.07691	0.15854	0.25776	0.25903	0.02267	0.04896	0.00000	0.86055	0.64969	0.19311	0.19382	0.95255	0.21651	0.40851	2.15407	1.21655	8.16333	0.23005	0.03662	0.85676	0.10791	0.45574	0.10946	0.08014	0.29051	0.09993	0.22786	0.20000	0.21965
		0.30552			0.26293	0.10706	0.09908	0.16113	0.28182	0.25539	0.05178	0.03610	0.05105	0.56002	0.44240	0.37527	0.16544	0.82108	0.11729	0.40851	2.17214	2.32568	9.45995	0.19222	0.05923	1.30585	0.27588	0.45753	0.12640	0.03585	0.10017	0.06488	0.28284	0.14642	0.21965
		0.37100			0.33353	0.13646	0.09450	0.11244	0.04838	0.35758	0.08274	0.05560	0.04896	0.15800	0.20618	0.13442	0.04906	0.52271	0.77086	0.42495	0.63246	1.60215	9.14341	0.24657	0.08759	1.32283	0.23441	0.42396	0.04853	0.06488	0.03229	0.04626	0.20000	0.10749	0.28284
		0.10711			0.49960	0.13655	0.08310	0.14304	0.07851	0.50394	0.08259	0.06469	0.04788	0.28475	0.03462	0.07802	0.07802	0.16555	0.44721	0.51042	1.02320	1.91886	8.01743	0.24259	0.06320	0.79196	0.25701	0.50565	0.05071	0.05602	0.06403	0.02396	0.40000	0.10749	0.28284
		0.49026			0.44179	0.16570	0.13534	0.09525	0.04470	0.58190	0.14304	0.05546	0.06469	0.07066	0.10894	0.09440	0.06320	0.37487	1.41492	0.72111	1.72047	1.28827	7.92970	0.03610	0.08376	0.69789	0.24066	0.31395	0.02073	0.04853	0.03160	0.06320	0.29081	0.13614	0.21965
		0.31796			0.66507	0.08937	0.06227	0.16170	0.05475	0.51967	0.25672	0.06772	0.05560	0.06937	0.11394	0.09585	0.10674	0.39633	1.00050	0.84853	0.83644	0.58941	6.71541	0.07066	0.05340	0.79268	0.19442	0.09570	0.03483	0.02240	0.07969	0.03585	0.20000	0.22544	0.15442
		0.12905			0.33208	0.12169	0.19507	0.15278	0.07741	0.49653	0.34034	0.07791	0.06476	0.06707	0.08938	0.12719	0.10526	0.54622	1.05279	0.67862	0.72111	0.65372	5.80312	0.04574	0.06454	0.61970	0.15800	0.15050	0.05792	0.08403	0.10548	0.03483	0.15442	0.20000	0.22787
		0.50382			0.05955	0.09480	0.47975	0.12471	0.05178	0.34903	0.24268	0.01746	0.03160	0.06476	0.06557	0.18426	0.16449	0.19510	0.28284	0.60000	1.88396	0.49001	5.42253	0.01746	0.04469	0.31392	0.14830	0.12775	0.08014	2.116373e-17	0.11076	0.01466	0.22787	0.22544	0.12842
		0.22096			1.08215	0.06320	0.38010	0.08035	0.01850	0.18207	0.22680	0.03608	0.04896	0.05207	0.16333	0.16905	0.10674	0.14633	0.77086	0.72656	1.64720	0.48995	7.16938	0.01746	0.02616	0.14549	0.10481	0.07066	0.07832	0.02240	0.11612	0.01694	0.31063	0.22544	0.28284
		0.38014			0.24691	0.04659	0.34764	0.02629	0.03160	0.14773	0.17315	0.03600	0.07734	0.10247	0.17740	0.25192	0.09480	0.40000	1.03645	0.40851	0.34649	1.20570	7.01366	0.03610	0.05923	0.29050	0.09313	0.03160	0.13407	0.01694	0.09993	0.02396	0.20000	0.20038	0.32225
		0.34823			0.30583	0.12973	0.34785	0.04446	0.05340	0.13950	0.22787	9.323149e-5	0.09480	0.16333	0.12719	0.20344	0.05105	1.60276	0.56569	0.62708	0.80852	2.28294	8.88144	0.03462	0.03160	0.09993	0.14132	0.14773	0.17185	1.446511e-17	0.03585	0.05070	0.28284	0.09763	0.28284
		0.21621			0.43476	0.09993	0.22120	1.718269e-16	0.25477	0.19222	0.20645	0.03609	0.03462	0.16042	0.11226	0.22657	0.03160	1.57050	0.65372	0.44721	1.00683	2.21812	8.26133	4.385381e-18	0.06320	0.18960	0.17546	0.07066	0.14182	0.04853	0.01694	2.279289e-3	8.746009e-10	0.09763	0.22787
		0.52853			0.39699	0.11554	0.09993	0.03160	0.25314	0.11394	0.25772	0.04907	0.09272	0.15199	0.02469	0.13559	0.03610	1.65517	0.48995	0.25000	0.11706	3.20624	8.61809	0.03462	0.05475	0.49230	0.26152	0.15050	0.10946	0.03483	0.04469	0.02396	0.09081	0.09763	0.22787
		0.25124			0.59094	0.05475	2.192690e-18	0.06454	0.36610	0.18207	0.26058	0.03609	0.36722	0.14693	0.30021	0.07066	0.10247	0.60000	0.14633	0.51033	0.25000	3.20624	7.99250	0.03610	2.192690e-17	0.76430	0.25672	0.08065	0.08191	0.02240	0.04853	0.03585	0.15442	0.14508	0.12842
		0.17113			0.30803	2.631229e-17	0.02267	0.07741	0.28878	0.11330	0.38674	0.04455	0.31624	0.04574	0.31929	0.36852	0.02000	2.49901	0.19510	1.28369	1.20185	2.74635	7.11132	0.05835	0.05475	0.82946	0.11244	0.11330	0.05141	0.01466	0.05792	0.04469	0.32791	1.615278e-9	0.14202
		0.25759			0.04618	0.05178	0.04659	0.04838	0.31758	4.079878e-16	0.29978	0.05106	0.17592	0.11344	0.38443	0.68068	9.211910e-17	5.49829	0.69463	1.25000	2.68742	2.65092	6.62118	0.06320	0.04469	1.18402	0.06320	0.15800	0.04626	0.03483	0.04854	0.04469	0.60000	3.408883e-8	0.30466
		0.21743			1.23199	0.03160	0.03160	0.03661	0.16575	0.03160	0.26655	0.04450	0.19193	0.07929	0.55187	0.70209	0.02000	4.49455	0.64633	1.61245	2.54951	3.40588	7.08811	0.03160	0.01850	1.34845	0.11394	0.03160	0.08191	0.01466	0.04854	0.07066	0.20000	3.007354e-9	0.38082
		0.27804			0.25834	0.07085	0.03160	0.04659	0.12169	0.11554	0.14607	0.05105	0.19192	0.09585	0.44014	0.47907	0.02000	4.45082	0.72656	1.26491	2.45507	2.80713	7.08676	0.01746	0.04470	1.20587	0.11897	0.13968	0.07066	0.05602	0.03160	0.05792	0.20000	3.461972e-8	0.36608
		0.35299			0.05646	0.08065	0.04469	0.01310	0.03160	0.20234	0.11405	0.08004	0.12309	0.11948	0.18426	0.42194	0.05207	4.83322	0.90531	2.18154	1.98703	2.42085	1.34048	0.03160	0.03160	1.08019	0.15908	0.13407	0.10946	0.01466	0.02240	0.04469	0.31063	0.10609	0.51532
		0.25570			0.35459	0.03160	0.02267	0.06585	0.07851	0.20880	0.07851	0.06958	0.12010	0.10674	0.17740	0.17017	0.03324	3.67696	1.20286	1.52157	2.54675	2.03939	0.75713	0.07066	0.07066	0.87401	0.05474	0.13029	0.04469	0.02073	0.04626	0.02073	0.14202	3.674546e-8	0.51272
		0.14442			0.47865	0.06585	0.04659	0.02267	0.06585	0.13407	0.16113	0.06328	0.03177	0.04788	0.11662	0.68645	0.04906	4.29895	0.23174	1.11929	4.07131	1.78885	0.41678	0.04906	0.04469	1.00823	0.12514	0.10722	0.11393	0.06543	0.07832	0.03585	0.10919	4.307428e-9	0.40000
		0.16064			0.44181	0.05340	0.27269	0.03662	0.04469	0.11244	0.12505	0.07930	0.03609	0.04574	0.01746	0.44745	0.19150	6.01664	0.39633	1.79104	4.07131	1.30929	0.65372	0.04709	0.03662	0.82225	0.11897	0.12505	0.11974	0.06543	0.05602	0.07969	0.21965	3.887429e-8	0.54706
		0.29486			0.46112	0.07066	0.24680	0.04838	0.04469	0.14012	0.13407	0.03462	0.03610	0.12251	0.03160	0.31122	0.28346	6.92110	0.88358	3.27774	3.32866	1.15445	0.21651	0.09175	0.04469	0.92129	0.11554	0.06454	0.13460	0.02073	0.07066	0.17184	0.10919	2.985147e-8	0.35294
		0.25148			0.06684	0.10790	0.28333	0.05923	0.01850	0.04469	0.04659	0.03610	0.02247	0.07066	0.04469	0.23800	0.28924	6.40000	2.84800	5.18197	3.65221	0.72111	0.21651	0.13823	0.03160	1.15617	0.15908	0.02267	0.28440	0.07969	0.03483	0.31364	0.14202	0.10609	0.21965
		0.29739			1.05364	0.08274	0.25477	0.05178	3.508305e-18	0.03160	0.13029	0.03160	0.02247	0.04469	0.09480	0.24300	0.26999	3.86088	2.84800	3.61273	3.67883	0.41678	0.20000	0.21649	0.05923	1.50796	0.24680	0.06714	0.09480	0.08403	0.03160	0.13029	0.10919	0.14617	0.14202
		0.28737			0.07966	0.04470	0.25053	0.01853	0.07066	0.06320	0.18393	0.04469	0.03462	0.05105	0.03462	0.70510	0.38359	1.28562	2.84800	3.76064	3.46960	0.71706	0.82462	0.25372	0.06320	1.31612	0.03160	0.08259	0.03585	0.06320	0.03585	0.12725	0.21965	0.10609	0.20000
		0.14376			0.20159	0.13597	0.05010	0.02267	0.20810	0.03662	0.14830	0.11360	0.04574	0.15410	0.05835	0.70948	0.15800	2.00342	0.49140	4.50822	4.12311	0.16555	1.06751	0.23397	0.03662	1.10608	0.01853	0.08065	0.03160	0.09480	0.03483	0.08403	0.18162	0.14617	0.12842
		0.48218			0.18319	0.14773	0.01853	0.01310	0.12708	0.05340	0.25772	0.06557	0.03610	0.33376	0.12760	0.80565	0.17602	2.80713	0.50000	4.19000	4.56508	0.42495	1.16412	0.16687	0.02267	1.10961	0.08760	0.09993	2.282624e-3	0.11612	0.07786	0.02241	0.21191	0.10609	0.30919
		0.07690			0.37119	0.09993	0.06585	0.04470	0.07085	0.03662	0.17017	0.05835	0.07066	0.31723	0.14455	0.60729	0.14491	2.23607	0.30620	4.13682	3.87336	0.84856	1.15445	0.18902	0.05178	0.80435	0.14132	0.06585	0.01466	0.03160	0.03160	0.14106	0.30466	0.09251	0.21965
		0.35996			0.27551	0.14132	0.03421	0.05178	0.16867	0.08938	0.28152	0.06476	0.04906	0.32468	0.27026	0.79189	0.20477	5.04425	0.23174	5.22733	2.81063	0.14347	0.89443	0.18045	0.01850	0.47505	0.27286	0.03662	0.03483	0.03585	0.03585	0.02240	0.29081	3.458148e-9	0.20000
		0.42201			0.09656	0.12514	0.02267	0.07066	0.16022	0.04470	0.20234	0.03462	0.09639	0.34034	0.22165	0.94959	0.08066	0.23911	0.61131	4.55655	1.56205	1.61245	0.72111	0.17740	0.02616	0.24853	0.07085	0.05178	0.03483	0.01694	0.06320	0.03585	0.30466	0.09251	0.14202
		0.43738			0.87675	0.01310	0.01853	0.02267	0.08065	0.06454	0.26443	0.02000	0.04896	0.19040	0.28615	0.90987	0.11394	0.14633	0.29484	2.82843	1.51933	3.01040	0.80429	0.21368	0.01310	0.37082	0.18825	0.04470	0.01466	0.03160	0.03160	0.03479	0.10919	1.192419e-8	0.21965
		0.28216			0.20729	0.08065	0.05178	0.15315	0.05010	0.12973	0.24789	0.03462	0.08662	0.19222	0.43539	0.40291	0.01414	0.23174	0.37487	1.85659	1.23290	3.85652	0.80000	0.24259	0.04659	0.29811	0.26792	0.06454	0.03483	0.01694	0.09593	0.03481	0.15442	0.22404	0.12842
		0.15903			1.43695	0.05475	2.411960e-17	0.22787	0.14304	0.13407	0.19729	0.05835	0.03610	0.07066	0.19013	0.59691	0.07066	0.52271	0.08294	0.93862	0.90531	0.19510	0.66337	0.14819	0.05178	0.04659	0.25503	0.09659	0.07832	0.12183	0.04626	0.03483	0.09081	0.10162	0.12842
		0.53190			0.06864	0.10722	2.480746e-17	0.19133	0.08170	0.08187	0.09908	0.01414	0.03160	0.04574	0.17592	0.44670	0.05560	0.34649	0.11729	0.52271	1.15445	0.84828	0.71162	0.17228	0.02267	0.10481	0.29056	0.14607	0.03386	0.09253	0.01466	0.03483	2.798735e-8	6.741123e-10	0.12842
		0.21953			0.21417	0.10722	0.06320	0.21438	0.07066	0.04838	0.24582	0.04469	0.01746	0.11816	0.23611	0.33845	0.15095	0.28294	0.33798	0.96932	0.73124	0.82462	0.80852	0.20374	0.03160	0.11394	0.31599	0.09570	0.01694	0.04854	0.03160	0.02240	0.20000	0.08905	0.31063
		0.06456			0.37205	0.07851	0.03421	0.15800	0.06714	0.02267	0.30526	0.05105	0.03610	0.24066	0.25477	0.59947	0.08000	0.11706	0.21651	0.53015	0.65372	0.82108	1.00000	0.14162	0.01850	0.07066	0.12529	0.09993	0.03483	0.04469	0.01466	0.02238	0.10919	0.13865	0.15442
		0.51130			0.15590	0.06322	0.01853	0.06454	0.11394	0.09583	0.19222	0.06937	0.02247	0.12447	0.17017	0.03610	0.12719	0.08294	0.44721	1.00000	0.63246	0.80429	0.56569	0.09159	0.04469	0.09908	0.12199	0.07066	0.05141	0.04626	0.05071	0.04626	0.09081	0.22300	0.22787
		0.24018			1.16081	0.05178	0.03160	0.06585	0.05010	0.12973	0.35046	0.07802	0.03462	0.06557	0.22345	0.04917	0.09585	0.10367	0.44721	0.82462	0.67862	0.84856	0.52367	0.13029	0.01850	0.13216	0.09670	0.03160	0.12838	0.10206	0.02396	0.05137	0.21965	0.22123	0.28284
		0.63215			0.52504	0.08065	0.03160	0.01310	0.08065	0.08259	0.36746	0.06557	0.05560	0.10247	0.14728	0.51503	0.07802	0.33333	0.28284	1.35684	0.32773	3.52691	0.92081	0.08355	0.01310	0.04659	0.08064	0.01853	0.02240	0.07968	0.02240	0.04855	0.22787	0.10162	0.32791
		0.19001			2.46319	0.12514	0.03160	2.192690e-18	0.05178	0.12640	0.37151	0.07066	0.10229	0.06476	0.01414	0.69578	0.13559	0.36086	0.11729	0.82108	0.28284	2.89930	0.71162	0.07802	0.01310	0.34041	0.05482	0.04470	0.06320	0.03483	0.02240	0.01466	0.09081	0.08905	0.21965
		0.18341			0.12605	0.09908	0.01310	0.18825	0.01850	0.16376	0.25348	0.05835	0.03462	0.05105	0.12447	0.45642	0.18426	0.90819	0.44721	1.42387	0.20000	5.14551	0.88294	0.10247	0.01927	0.35254	0.03424	0.05475	0.03585	0.01694	0.01466	0.04464	0.09081	0.10405	0.30466
		0.34586			0.32626	0.05475	0.01310	0.07741	0.02267	0.05923	0.22197	0.11662	0.01453	0.01746	0.25833	0.53739	0.21624	0.82462	0.14347	1.88294	0.11729	6.34549	1.88476	0.16492	0.14304	0.42981	0.01327	0.03662	0.13029	0.03160	0.03585	0.01694	0.15442	8.732582e-9	0.21965
		0.31908			0.45679	0.03421	0.00000	0.08938	0.01850	0.03160	0.16376	0.07742	0.08072	0.15469	0.15410	0.26386	0.16687	1.56205	0.34649	1.35469	0.32773	3.49285	2.04584	0.07066	0.17685	0.23694	1.570721e-3	0.03662	0.05141	0.03585	0.01694	0.02385	2.348663e-9	0.09662	0.32225
		0.10132			0.36824	0.04838	0.00000	0.09913	0.03160	0.03160	0.13029	0.01414	0.08252	0.07863	0.25025	0.17828	0.09440	1.44222	0.20000	0.29484	1.10125	0.41678	2.04584	0.21198	0.19222	0.32616	0.01858	0.05178	0.06320	0.08147	0.01694	0.01695	0.10919	0.13866	0.30472
		0.35993			1.04652	0.10722	0.00000	0.07066	0.07066	0.04470	0.09483	0.04586	0.12760	0.08000	0.16333	0.21867	0.06320	0.40000	0.42495	1.04906	0.71162	0.51042	2.92391	0.12760	0.17400	0.27286	0.03420	0.09993	0.17995	0.03160	7.016603e-18	0.01694	0.20000	0.08905	0.25008
		0.11736			0.56066	0.16420	0.00000	0.14125	0.08170	0.04838	0.08065	0.05557	0.04906	0.08000	0.12447	0.19311	0.11394	0.80429	0.28284	0.66337	0.61131	2.68294	3.22490	0.15800	0.19611	0.11405	0.06489	0.13029	0.11394	0.04854	0.01694	0.01686	0.12842	0.08905	0.33344
		0.27472			0.34005	0.15854	0.00000	0.18207	0.12640	0.07741	0.09495	0.08355	0.04788	0.07802	0.07066	0.17546	0.08938	1.81108	0.11706	0.40851	0.14347	3.53974	3.05654	0.15800	0.06320	0.11680	0.05180	0.14649	0.02240	0.13619	0.02396	0.04854	0.14202	0.08905	1.69967
		0.10836			0.34928	0.13029	0.01310	0.14773	0.11394	0.05474	0.06585	0.06476	0.03462	0.03160	0.12719	0.09480	0.07734	1.29353	0.56569	1.82745	0.51042	1.50969	3.48264	0.25212	0.05010	0.15164	0.24134	0.09570	0.16721	0.03585	0.05141	0.03158	0.09081	0.13866	1.30178
		0.20416			0.41514	0.08274	0.00000	0.19824	0.11394	0.08376	1.664372e-16	0.06320	0.01414	0.03160	0.13823	0.22588	0.13407	1.64924	1.00050	1.68496	0.44721	1.12840	3.67696	0.07863	0.04659	0.16867	0.20259	0.15808	0.23769	0.08403	0.06548	0.03478	0.09081	0.08905	1.30178
		0.26900			0.30336	9.650329e-17	1.754152e-18	0.18890	0.09313	0.11244	0.01853	0.03462	0.02469	0.03610	0.19040	0.20754	0.12723	1.16619	1.08925	2.71958	0.60571	1.33216	3.60555	0.04906	0.03160	0.27331	0.18019	0.02267	0.19352	0.03585	0.06865	0.04468	0.14202	0.08905	1.35703
		0.29041			1.06234	0.14363	0.01850	0.18434	0.12708	0.07066	0.14490	0.02252	0.02247	1.052491e-16	0.09486	0.51761	0.11175	1.28062	1.68294	3.80529	1.34639	1.21655	3.11190	0.05835	0.08759	0.50577	0.14590	0.05010	0.27678	0.02073	0.06543	0.03481	3.026204e-9	2.564677e-8	0.37978
		0.10209			0.35615	0.04470	0.02267	0.05474	0.08065	0.05475	0.08274	0.03462	1.054545e-16	0.01414	0.04586	0.23534	0.09440	0.49001	2.22273	5.65614	1.34385	2.28294	2.44634	0.11360	0.14304	0.42969	0.19986	0.05475	0.30743	0.11394	0.03160	0.04461	0.12842	1.001404e-8	0.46030
		0.25658			2.73448	0.05178	0.02267	0.08376	0.17698	0.05475	0.05178	0.03462	9.673319e-17	0.01746	0.06557	0.20374	0.15896	0.67862	2.20000	0.52844	1.41421	1.11706	2.74104	0.15713	0.08844	0.29750	0.14363	0.01850	0.07969	0.07066	0.05602	0.01696	0.09081	0.10162	0.28284
		0.19872			0.62747	0.03160	0.02267	0.01850	0.09480	0.03160	0.19986	0.01746	0.18132	0.02247	0.10247	0.21332	0.10247	0.96932	2.68294	1.11985	1.30929	1.76304	3.38389	0.17740	0.11762	0.28333	0.21048	0.08376	0.05792	0.14480	0.11270	0.05793	1.362110e-8	1.097169e-8	0.30466
		0.37217			0.37169	1.000021e-16	3.289036e-17	0.05475	0.28333	0.05010	0.22345	0.04906	0.15863	0.01746	0.16905	0.12235	0.12235	0.77021	3.20624	1.81887	1.12577	1.54113	3.12723	0.26714	0.12640	0.25357	0.14765	2.628761e-16	0.17716	0.04854	0.02073	0.01703	0.14202	0.10162	0.32791
		0.08545			0.24070	0.08759	0.01850	0.04469	0.13029	0.14132	0.06454	0.03610	0.17502	0.03160	0.02469	0.33591	0.06320	0.40851	3.00000	2.05748	0.40851	1.56436	3.95130	0.22773	0.10481	0.20687	0.21233	0.08065	0.13460	0.07066	0.04626	0.02232	0.14202	0.10162	0.29081
		0.18123			0.23526	0.01310	0.02267	0.04469	0.15315	0.08938	0.14072	0.09585	0.17502	0.04896	0.02469	0.12122	0.11344	0.51042	3.32309	2.02498	0.20000	2.64272	4.68188	0.14054	0.07741	0.46811	0.15164	0.02267	0.30556	0.07066	0.11394	0.22162	0.28284	2.610159e-8	0.21965
		0.15008			1.03812	0.06714	0.02616	0.03421	0.01849	0.05010	0.15800	0.09639	0.16449	0.09159	0.01746	0.05560	0.14132	0.34649	3.41469	2.17214	0.34649	2.06710	4.39157	0.12235	0.14830	0.51896	0.26512	0.03160	0.36030	0.04626	0.15800	0.25699	0.10919	0.10162	0.28284
		0.27530			0.13048	0.15808	0.01310	0.01310	0.05475	0.03421	0.01853	0.11662	1.754138e-18	0.06557	0.01414	0.17303	0.08662	0.89443	2.88112	1.53973	0.23174	1.65517	3.52471	0.12447	0.18207	0.39339	0.04659	0.03421	0.28075	0.02073	0.05792	0.21379	0.22787	0.22838	0.21965
		0.06514			1.66857	0.12505	1.519773e-17	2.530255e-17	0.09659	0.04469	0.09993	0.14694	0.02247	0.16113	0.03610	0.11394	0.05207	1.11051	2.14711	1.05186	0.20000	1.33401	3.49285	0.11394	0.40594	0.47400	0.13029	0.11179	0.22599	0.03160	0.06543	0.23796	0.20000	0.14473	0.20000
		0.22477			0.32684	0.11393	0.01850	0.04469	0.06454	0.07066	0.02267	0.13824	0.01746	0.04469	0.32613	0.06476	0.08662	1.65517	1.36988	0.32773	0.20000	0.63246	2.97321	0.18247	0.34163	0.59371	0.05178	0.03662	0.28579	0.04626	0.06320	0.25475	0.20000	0.09860	0.36824
		0.23538			0.92397	0.09993	0.01850	0.03662	0.04470	0.06585	0.01850	0.06877	0.02247	0.03610	0.26386	0.19040	0.17546	1.72047	0.82462	1.00343	0.35355	0.65372	2.46735	0.15803	0.36030	0.37151	0.13029	0.02267	0.12445	0.07066	0.02240	0.03585	0.12842	0.20000	0.22787
		0.16268			0.76591	0.08759	0.01850	0.06585	0.07066	0.17017	7.235879e-17	0.06800	0.01746	0.19876	0.26374	0.22434	0.17632	1.56205	1.58563	0.78403	0.36086	1.00638	2.40285	0.20249	0.88059	0.22159	0.09993	0.07630	0.11393	0.04853	0.06488	0.03585	0.21965	0.22510	0.22787
		0.21858			0.33495	0.04469	0.00000	0.08844	0.03661	0.08759	0.01310	0.02714	0.04574	0.05835	0.24688	0.14442	0.06476	0.49692	2.88444	0.49001	7.00000	0.82462	2.53695	0.23746	0.84034	0.23970	0.06585	0.06320	0.01694	0.04626	0.04853	0.03585	0.10919	0.13292	0.28284
		0.27434			0.27407	0.03160	0.00000	0.04838	0.06714	0.09993	0.08065	0.01414	0.03462	0.22787	0.22657	0.18338	0.07802	1.31706	2.88444	0.48294	1.42706	0.00000	2.00000	0.22345	0.55212	0.15050	0.11244	0.08274	1.263180e-16	0.04854	0.03160	0.06320	0.14202	0.11135	0.22787
		0.16674			0.15722	0.07066	0.00000	0.02267	0.08065	0.05475	0.07066	0.01414	0.05835	0.04788	0.07734	0.27183	0.07734	1.00050	2.00489	0.58941	1.67483	0.60571	1.28294	0.11346	0.80373	0.14823	0.08844	0.06322	0.03585	0.04469	0.17017	0.03483	1.424973e-8	5.897090e-10	0.29081
		0.26848			1.12821	0.03415	0.01850	0.03662	0.07066	0.07308	0.06585	0.01414	0.01414	0.06937	0.06320	0.20372	0.03160	0.71162	1.79104	0.33798	1.53537	0.80429	1.53815	0.07068	0.91659	0.25280	0.06585	0.19228	0.03160	0.03483	0.06488	0.02240	0.14202	1.769127e-9	0.31063
		0.02272			0.20975	0.08110	0.00000	0.02616	0.08938	0.16420	0.03208	0.01746	0.08066	0.21357	0.05207	0.15896	0.01414	0.55972	1.65517	0.51042	1.71702	0.30620	0.57748	0.05212	0.31372	0.46977	0.07741	0.18426	0.03483	0.02240	0.03483	0.02240	0.10919	0.11256	0.40000
		0.15606			1.20564	0.12141	0.02267	0.03421	0.05039	0.15164	0.09036	0.03160	0.01746	0.19504	0.02247	0.05207	0.02247	0.74443	2.06434	0.40851	1.74317	0.44721	5.81632	0.14441	0.48715	0.86797	0.05475	0.11179	0.02073	0.04469	0.03160	0.02240	0.20000	0.08901	0.21965
		0.34507			0.10241	0.08027	0.00000	0.04659	0.04469	0.15260	0.12172	2.631229e-17	0.01746	0.13632	0.01746	0.08938	0.01746	0.80429	3.65556	0.61131	1.28763	1.09590	6.82033	0.14132	0.37827	1.16301	0.03160	0.06320	0.03160	0.02240	0.03483	0.03484	0.14202	0.14332	0.30919
		0.31583			0.58788	0.10448	0.01850	0.04469	0.01853	0.08759	7.625182e-3	0.03160	0.05835	0.07066	0.11662	0.25477	0.04896	0.40851	3.61879	0.44721	1.45212	0.56569	7.09366	0.10984	0.29038	1.50726	0.16619	0.05923	0.04926	0.02240	0.09993	9.045274e-6	0.12842	0.20000	0.10919
		0.16013			0.34190	0.05149	0.00000	0.01850	0.06343	0.07066	0.04659	0.03160	0.01414	0.03324	0.10986	0.23262	0.05835	0.40851	3.76985	0.72656	0.60547	0.70752	5.53173	0.10525	0.33348	1.23775	0.14765	0.03160	0.03160	0.11612	0.03483	0.03584	0.20000	0.20000	0.15442
		0.14019			0.94400	0.01850	0.01850	3.091694e-16	0.07066	0.08759	0.20229	0.01746	0.06476	0.03610	0.12595	0.14405	0.05207	0.55440	1.92063	0.80852	0.20000	0.23174	4.04969	0.04896	0.31627	0.96263	0.14304	0.11244	0.03585	0.07066	0.03483	0.07063	0.09081	0.30215	0.00000
		0.38838			0.31446	1.333762e-17	0.01310	0.12973	0.06454	0.09659	0.20270	0.01746	0.03462	0.11394	0.11662	0.07734	0.09585	0.00000	1.21699	1.20286	0.27335	0.40000	1.48525	0.05559	0.34041	0.63985	0.15854	0.01853	0.03585	0.06543	0.03160	0.06705	0.20000	0.28313	0.30919
		0.10194			0.37046	0.01310	0.01850	0.26008	0.11244	0.13950	0.16619	0.01414	0.03610	0.05560	0.12640	0.07802	0.06476	0.72184	0.82108	1.28294	0.48821	0.40851	1.68700	0.03462	0.12180	0.38051	0.13660	0.06454	0.02240	0.06543	0.03483	0.07066	0.09081	0.28313	0.09081
		0.09405			0.18124	0.02267	0.00000	0.27089	0.06320	0.08065	0.13534	0.01414	0.02247	0.01745	0.23553	0.11226	0.03610	0.28284	1.34164	1.23052	0.93653	0.58941	2.97026	0.08657	0.11394	0.14132	0.12169	0.05923	0.00000	0.05602	0.03160	0.06320	0.10919	0.20038	0.09081
		0.03081			0.82824	0.04470	0.00000	0.22069	0.01850	0.06320	0.16420	0.02469	0.01746	0.05835	0.22472	0.19986	0.08662	0.48995	2.39349	1.00000	1.12829	0.32773	2.67675	0.08252	0.34806	0.05475	0.11394	0.08759	0.00000	0.09175	0.03160	0.07832	0.15442	0.08993	0.10919
		0.25916			0.26419	0.02267	0.01850	0.20211	0.45668	0.06320	0.23290	0.09585	2.220580e-17	0.28264	0.19192	0.20477	0.06556	0.92081	3.98497	0.41678	0.56538	0.34649	1.51193	0.06477	0.27193	0.08259	0.07630	0.03661	0.08014	0.04926	0.03483	0.08403	0.15442	0.22418	0.22787
		0.21972			0.38452	0.02616	0.00000	0.07720	0.63594	0.03160	0.24853	0.11576	0.03462	0.30575	0.11394	0.31323	0.01483	0.34649	3.78546	0.28284	0.84822	0.34649	0.40851	0.09440	0.14072	0.48663	0.13029	0.07066	0.09593	0.04853	0.01466	0.07066	0.29081	0.39783	0.36824
		0.04042			0.10709	0.03160	0.03160	0.06323	0.51814	0.07851	0.09993	0.11662	0.01414	0.34034	0.14455	0.28475	0.03160	0.00000	4.20476	0.23174	1.08925	0.86054	1.13483	0.05207	0.28500	0.41228	0.06454	0.04838	0.12725	0.09993	0.02073	0.06543	0.14202	0.44758	0.32791
		0.13288			0.91857	0.02267	0.01310	0.05345	0.62307	0.06454	0.17698	0.12122	0.01414	0.27432	0.17017	0.29905	0.08938	0.53015	3.46452	0.20000	0.51980	0.23174	0.52271	0.03160	0.36030	0.43401	0.03160	0.07066	0.23874	0.08938	0.01709	0.04469	0.09081	0.34432	0.44721
		0.20733			0.27990	0.08170	0.01850	0.05010	0.60328	0.09128	0.10790	0.10526	0.01414	0.29473	0.23929	0.33704	0.07066	0.49692	2.12466	1.12014	1.28294	0.37487	1.49243	0.07734	0.15800	0.41549	0.05923	0.05923	0.28490	0.10206	0.01694	0.04469	0.15442	0.20000	0.49454
		0.24717			0.80818	0.11762	0.01850	0.01850	0.08065	0.15808	0.05923	0.03610	0.03160	0.10894	0.28615	0.39791	0.13823	0.96582	2.00296	1.21655	0.08294	1.00000	1.62482	0.03160	0.36987	0.47707	0.03421	0.06454	0.15891	0.07066	0.03160	0.05792	0.10919	0.08987	0.44721
		0.03785			0.68651	0.06320	3.069767e-17	0.04469	0.32991	0.08759	0.04469	0.03610	0.16953	0.15095	0.58636	0.28440	0.19338	1.00000	1.28030	1.21655	0.56569	1.12840	0.92081	0.07929	0.31995	0.15164	0.05475	0.05340	0.20894	0.05792	0.06320	0.03585	0.20000	0.08901	0.41018
		0.27105			0.30113	0.03662	3.069767e-17	0.08170	0.07066	0.14773	0.07741	0.02000	0.14780	0.17876	0.60123	0.28264	0.18045	1.16619	0.91706	1.34711	1.40245	0.69290	0.60653	0.07863	0.48435	0.20114	0.08170	0.03662	0.16463	0.09630	0.04854	0.05602	0.22787	0.11256	0.28284
		0.21333			0.15386	0.05010	0.01310	0.02616	0.31282	0.14490	0.19449	0.02000	0.16544	0.27173	0.53813	0.18426	0.11406	1.06066	0.63246	1.08611	1.62663	0.51042	0.55972	0.03462	0.45037	0.17017	0.07085	0.01850	0.03160	0.03585	0.04926	0.04469	0.10919	0.11256	0.32225
		0.20680			0.14565	0.03160	0.01850	0.04659	0.20515	0.11480	0.04659	0.01414	0.15199	0.15896	0.69542	0.16333	0.14819	1.08954	0.66337	1.49928	3.05048	0.31706	1.10125	0.02469	0.53720	0.22787	0.15808	0.06454	0.01466	0.03483	0.12640	0.03160	0.12842	0.08901	0.10919
		0.19781			0.82180	0.02267	0.01850	0.09993	0.07066	0.09993	0.05475	0.03160	0.12251	0.15803	0.44274	0.06707	0.06320	0.36086	0.21651	1.24866	2.60000	0.93054	1.28827	0.08355	0.17400	0.07741	0.22787	0.03662	0.21893	0.02073	0.11174	0.03160	0.22787	0.20000	0.44721
		0.14782			0.29608	0.06714	0.01310	0.21404	0.29138	0.23580	0.03421	0.02000	0.06557	0.14132	0.33495	0.10526	0.12760	0.28968	0.20000	1.42387	2.93407	1.69967	0.53015	0.01415	0.56011	0.19050	0.34588	0.03662	0.02240	0.03483	0.03585	2.557095e-17	0.20000	0.20000	0.28284
		0.24332			0.45682	0.12169	0.01310	0.11897	0.06454	0.26964	0.07066	0.01414	0.06476	0.14780	0.23907	0.04788	0.04896	0.28968	0.44839	1.61640	2.48763	8.14505	0.41678	0.05560	0.06585	0.09659	0.37981	0.03662	0.19986	0.04926	0.04626	0.07923	0.30919	0.40000	0.21965
		0.06526			0.07592	0.18066	0.09908	0.13029	0.10791	0.26622	0.03662	0.02247	0.03610	0.13029	0.30575	0.17740	0.05207	0.19549	0.61131	1.89893	1.23052	6.61314	0.11706	0.03610	0.08065	0.50316	0.45244	0.04838	0.32991	0.03160	0.04854	0.04626	0.20000	0.51202	0.27456
		0.27649			0.58704	0.11554	0.26999	0.05178	0.15315	0.23580	0.03421	0.04469	0.06707	0.12760	0.17228	0.14994	0.04469	2.98507	0.63246	1.93077	0.40851	5.09865	0.53015	0.01746	0.11179	0.41201	0.32910	0.08065	0.22345	0.02240	0.03585	0.03585	0.14202	0.39787	0.36608
		0.27532			0.22249	0.21077	0.26567	0.06320	0.07066	0.16619	0.03662	0.13442	0.06707	0.31648	0.25679	0.18649	0.07066	3.28708	0.48995	1.93757	1.12840	3.16845	1.13483	0.08662	0.16619	0.57126	0.31915	0.07323	0.39197	0.05071	0.05141	0.01694	0.35294	1.65939	0.18199
		0.10309			0.96732	0.06714	0.26194	0.05010	0.21198	0.08376	0.05010	0.12882	0.03610	0.49476	0.32991	0.30350	0.14491	2.85606	0.35355	2.37796	0.14347	1.85659	1.49636	0.21332	0.72749	0.67401	0.35707	0.12180	0.50300	0.05792	0.04626	0.03160	0.29081	2.36813	0.28483
		0.29966			0.48242	0.01850	0.23580	0.03662	0.12514	0.10481	0.07741	0.06320	0.02247	0.55484	0.38236	0.25320	0.21198	2.67802	1.00000	1.71906	0.14347	0.66337	1.30666	0.14819	0.38051	0.76066	0.42731	0.12719	0.45599	0.03585	0.04926	0.06543	0.09265	2.52950	0.28284
		0.16312			0.18987	0.05178	0.32962	0.03421	0.06320	0.05475	0.04469	0.12719	0.08066	0.86423	0.36722	0.18902	0.11394	2.84253	1.52844	1.60428	0.63246	1.16412	0.23174	0.18143	0.26623	0.80005	0.29334	0.14132	0.37600	0.03572	0.12640	0.03585	0.12842	2.52950	0.10919
		0.18539			0.24336	0.06454	0.03662	0.04469	0.17161	0.06714	0.01417	0.12719	0.02247	0.86452	0.44335	0.33591	0.08000	2.68328	0.69299	1.34385	0.56569	1.83864	0.93498	0.14994	0.28260	0.32534	0.42396	0.07742	0.43096	0.06854	0.11612	0.06320	0.09265	2.06114	0.22787
		0.03511			0.06215	0.12505	0.02616	0.04469	0.15854	0.03160	0.07066	0.03160	0.07066	0.75112	0.39087	0.36899	0.17592	1.71507	0.41678	1.33216	2.00998	3.13859	1.00050	0.03324	0.34806	0.29811	0.54367	0.06454	0.29789	0.05126	0.07923	0.03585	0.20000	1.10373	0.12842
		0.35363			0.97215	0.05806	0.06585	0.09570	0.11405	0.04838	0.08938	0.03160	0.11394	0.56273	0.29562	0.52505	0.08986	1.61640	0.65372	1.67130	2.74014	1.86393	1.01980	0.03610	0.09313	0.22120	0.46626	0.02267	0.15642	0.05763	0.04854	0.05792	0.09081	0.84923	0.22787
		0.05458			0.23773	0.06588	0.09993	0.05923	0.05475	0.03160	0.11554	0.06937	0.10526	0.66581	0.20374	0.56049	0.03610	1.23052	0.49001	1.40489	2.50483	3.19512	0.91706	0.03462	0.14132	0.26778	0.22378	0.01850	0.01466	0.03160	0.03483	0.08615	0.20000	0.99162	0.49914
		0.19523			0.62615	0.13534	0.05923	0.06320	0.09128	0.04838	0.08938	0.01746	0.20945	0.36852	0.09988	0.69520	0.09272	0.63246	0.72656	1.64924	1.95835	3.16228	0.29484	0.03160	0.22497	0.10329	0.24680	0.03421	7.016603e-18	0.05086	0.04469	0.21398	0.14202	0.94012	0.62851
		0.28188			0.25036	0.08759	0.04469	0.14549	0.06454	0.01850	0.07066	0.03610	0.06320	0.46977	0.08000	0.70163	0.09988	0.51042	1.00000	1.18652	2.28035	3.18826	0.79206	0.06476	0.34433	0.15646	0.22356	0.08065	0.11612	0.05099	0.02396	0.23005	0.20000	0.89169	1.05409
		0.16598			0.75702	0.06585	0.07066	0.10019	0.12775	0.02267	0.05340	0.02247	0.16953	0.48975	0.19040	0.69284	0.04469	0.30620	1.21655	0.95255	1.13137	1.88680	0.44839	0.07863	0.26581	0.02616	0.09480	0.17315	0.20706	0.06592	0.00000	0.20584	0.22787	0.94747	2.54951
		0.10131			0.09490	0.10722	0.04838	0.18709	0.03421	0.03421	0.00000	0.05835	0.20344	0.73557	0.15896	0.51308	0.14442	0.08294	0.80000	0.85660	0.77021	4.13682	0.52367	0.11662	0.18890	0.28738	0.21284	0.11554	0.11612	0.05134	0.03585	0.22599	0.29081	0.13798	2.54951
		0.02075			0.98843	0.05923	0.03662	0.18393	0.26058	0.04470	0.03662	0.04469	0.10674	0.62325	0.14162	0.48081	0.09159	0.08294	0.80852	0.99024	0.32773	3.67883	0.37487	0.06320	0.28709	0.38221	0.08938	0.05475	0.09480	0.06343	0.01466	0.23647	0.21965	0.35403	7.828876e-9
		0.20044			0.39183	0.03421	0.10722	0.10722	0.13029	0.03421	0.03662	0.08355	0.20829	0.95567	0.08252	0.38443	0.06476	0.89066	1.33216	0.72111	0.14347	3.82099	0.61131	0.07734	0.30526	0.50659	0.12514	0.09908	0.22345	0.03672	1.463779e-23	0.04853	0.28284	0.23388	0.27456
		0.17759			0.27741	0.03421	0.21079	0.01310	0.08759	0.09993	0.05923	0.11394	0.03160	1.01285	0.14693	0.11662	0.09585	0.72111	0.14347	1.21095	0.34649	3.88392	0.75295	0.11314	0.23290	0.30942	0.09570	0.17971	0.06320	0.05211	0.01466	0.04626	0.28284	0.31890	0.20000
		0.12794			0.23006	0.03160	0.12708	0.04469	0.08259	0.10722	0.03421	0.12640	0.02000	1.15568	0.43069	0.12760	0.05207	0.72111	0.34649	0.93447	0.23174	5.63560	0.86054	0.07066	0.25903	0.46626	0.09993	0.28298	0.06320	0.07048	0.01466	0.05071	0.30919	0.40039	0.09081
		0.31989			0.18426	0.05923	0.13407	0.08274	0.09128	0.07066	0.03662	0.10894	0.03160	0.95971	0.51974	0.04896	0.05105	0.82462	0.82462	0.88440	0.11706	3.98497	0.76414	0.09440	0.34588	0.19611	0.16376	0.25903	0.03160	0.05606	0.02240	0.03483	0.10919	0.31227	0.20000
		0.19636			0.09142	0.04469	0.12708	0.12169	0.09570	0.07066	0.09659	0.11344	0.06476	0.90167	0.44353	0.08355	0.05835	1.00343	1.34385	0.87279	0.49001	3.01671	1.33333	0.01414	0.28260	0.12169	0.10322	0.06454	0.10028	0.01685	0.07832	2.631229e-18	0.10919	0.14432	0.22787
		0.13114			0.73288	0.07066	0.15908	0.08759	0.12640	0.06320	0.09659	0.15407	0.02247	0.80005	0.31161	0.26058	0.08938	1.13137	1.87279	3.85805	0.77021	2.23128	1.37437	0.08938	0.24348	0.23580	0.11391	0.07085	0.09175	0.03054	0.03484	0.08615	0.21965	0.13867	0.22787
		0.04474			0.23239	0.04659	0.10722	0.05923	0.14549	0.07085	0.09480	0.09993	0.01746	0.80758	0.18426	0.27696	0.11394	0.48995	2.04584	3.85805	1.31967	2.84253	0.50000	0.08000	0.18960	0.41080	0.04463	5.262457e-17	0.07832	0.09329	0.05086	0.08014	0.32225	0.22847	0.15442
		0.13546			0.26822	0.16420	0.08274	0.01850	0.27965	0.03662	0.14072	0.06557	0.01414	0.69534	0.19943	0.36427	0.09988	0.48995	2.04678	3.72678	1.52315	0.44721	0.56569	0.15800	0.18243	0.09570	0.02612	0.07085	0.05602	0.06600	0.01702	0.07786	0.30919	0.41559	0.10919
		0.24077			0.14287	0.16974	0.03421	2.806644e-17	0.16974	0.05923	0.10948	0.08982	0.01414	0.66517	0.24657	0.22189	0.18609	0.23174	1.82933	3.55918	1.18652	1.49636	1.98703	0.05560	0.07755	0.30418	0.04462	0.19222	0.04926	0.05576	0.03160	0.09993	0.35294	0.40040	0.15442
		0.08595			0.67508	0.14363	0.08376	0.01850	0.09128	0.05010	1.301654e-17	0.16953	0.05105	0.63186	0.26058	0.35060	0.14819	0.44721	1.52315	4.23171	0.95255	2.39349	3.95130	0.08662	0.05923	0.14649	0.05342	0.26128	0.06542	0.03166	0.03585	0.09993	0.31063	0.14432	0.10919
		0.14500			0.06772	0.14363	0.14363	0.03160	0.23643	0.04838	0.31122	0.15896	0.04917	0.39839	0.26714	0.07863	0.13442	0.08294	1.38814	4.52149	1.12318	3.32341	2.72029	0.05560	0.05475	0.10870	0.07853	0.16619	0.03483	0.01452	0.04469	0.03160	0.22787	0.21610	0.09081
		0.09808			0.94800	0.13407	0.07741	0.02616	0.23539	0.09583	0.34859	0.15800	0.03160	0.34766	0.06707	0.09988	0.25691	0.21651	1.69967	4.25516	0.56569	3.49538	2.05748	0.09585	0.13968	0.32534	0.05344	0.18747	0.19222	0.03155	0.03479	0.04626	1.486831e-8	0.09473	0.12842
		0.05041			0.42168	0.06585	0.18426	0.07741	0.09570	0.11394	0.31065	0.12760	0.04788	0.10986	0.22345	0.13555	0.25280	0.23174	3.49064	4.75991	1.15445	2.45128	1.20000	0.06320	0.18428	0.23689	0.11396	0.12505	0.12639	0.09370	0.06537	0.05792	0.14202	0.09473	0.09081
		0.19262			0.20841	0.05340	0.21273	0.09570	0.16167	0.12388	0.17637	0.14129	0.04788	0.06320	0.24688	0.14132	0.21615	0.33798	3.91312	4.94873	0.40851	2.57185	0.34649	0.13407	0.13415	0.16167	0.13540	0.06320	0.10548	0.04854	0.05601	0.02073	0.14202	0.22815	0.14202
		0.36209			0.39218	0.02267	0.22087	0.01310	0.10790	0.06322	0.18956	0.04574	0.06476	0.08662	0.31600	0.10247	0.07515	0.14347	3.32881	4.46210	0.72656	3.80058	1.56205	0.13407	0.06454	0.23290	0.18428	0.03662	0.08615	0.06705	0.05141	0.08403	0.09081	0.28315	0.60683
		0.37020			0.38496	0.01853	0.21815	0.06320	0.20229	0.05010	0.11554	0.03610	0.08355	0.09480	0.33165	0.12122	0.08150	0.21651	3.08451	5.54617	0.34649	2.22335	1.04906	0.12882	0.09128	0.22497	0.15800	0.02616	0.07832	0.04469	0.01466	0.08403	0.29081	0.14579	0.14202
		0.15873			0.30405	0.05192	0.28274	0.10329	0.05475	0.04469	0.09480	0.03160	0.06557	0.16333	0.40905	0.28295	0.28064	0.20000	3.34109	4.91002	0.52367	1.94711	1.41631	0.11314	0.08170	0.21404	0.11244	0.19044	0.20654	0.07969	0.06332	0.07969	0.41018	0.20000	0.09081
		0.01440			0.74413	0.06458	0.27217	0.12640	0.16867	0.03160	0.09993	0.02247	0.06937	0.14819	0.43900	0.42131	0.24035	0.40966	2.51978	5.33667	0.23174	2.00000	0.93498	0.12719	0.21815	0.19222	0.10870	0.21709	0.14106	0.02240	0.04853	0.04853	0.51723	0.23111	0.12842
		0.07766			0.27904	0.10980	0.02607	0.19986	0.18825	0.02267	0.14773	0.01746	0.05105	0.22120	0.57764	0.46162	0.13707	0.36086	1.64924	5.82953	0.14347	2.68711	1.26491	0.16953	0.09993	0.19005	0.09993	0.09992	0.05792	0.02395	0.07968	0.02240	0.51723	0.21295	0.09081
		0.13559			0.63993	0.13423	0.07269	0.14649	0.26813	0.10870	0.08759	0.02469	0.03160	0.14132	0.58584	0.68088	0.03488	1.85157	2.68294	5.76804	0.61131	3.20000	0.86453	0.12235	0.12708	0.13950	0.04659	0.12640	0.05792	0.01466	0.03483	0.04469	0.14202	0.10196	0.60000
		0.46479			0.90006	0.16637	0.09908	0.12505	0.27193	0.15800	0.08759	0.05207	0.04469	0.16494	0.58075	0.76168	0.16097	2.42888	3.20000	4.89929	0.44721	1.21165	1.64924	0.13559	0.05340	0.16575	0.06320	0.27311	0.03483	0.05071	0.05792	0.03160	0.01838	0.13712	0.10919
		0.08927			0.13419	0.19207	0.06344	0.09128	0.40360	0.03160	0.05475	0.03462	0.02469	0.20653	0.32221	0.71199	0.17658	2.91941	2.94635	3.41760	0.44721	1.13823	4.06376	0.09159	0.11762	0.43392	0.01374	0.17749	0.03483	0.04469	0.03673	0.04926	0.20000	0.20000	0.14202
		0.11038			0.88986	0.14540	0.10819	0.07851	0.37650	0.01850	0.01310	0.03903	0.02469	0.31305	0.06557	0.84029	0.41210	3.68278	2.82981	2.32589	0.29484	0.41469	4.82423	0.03462	0.09993	0.25357	0.07896	0.06304	0.04469	0.01694	0.03160	0.03160	0.12842	0.09788	0.14202
		0.17160			0.51157	0.11734	0.08068	0.12505	0.41216	0.02616	0.04469	0.05105	0.04896	0.29086	0.20618	0.98722	0.72759	3.68278	3.84708	1.51933	0.42495	0.88358	7.61052	0.11948	0.27269	0.30506	0.06728	0.14006	0.05141	0.01466	0.04469	0.03483	0.12842	5.316368e-10	0.15442
		0.06738			0.45795	0.10468	0.11386	0.17546	0.58188	0.03160	0.01850	0.02247	0.01746	0.30516	0.31323	1.15211	0.74363	3.70276	3.93396	1.92747	1.15445	0.73677	9.42478	0.06707	0.38443	0.17650	0.12316	0.14363	0.05071	0.01694	0.01466	0.03123	0.77517	0.09788	0.31063
		0.07308			0.49037	0.12169	0.08938	0.12388	0.43900	0.09659	3.069767e-17	0.04469	0.01414	0.23744	0.27026	0.87631	0.61546	2.83327	3.60555	2.70161	1.77271	0.20000	9.83260	0.06707	0.26655	0.09570	0.10018	0.17317	0.02396	0.04469	0.05792	0.04626	0.91497	2.194303e-8	0.28483
		0.39413			0.33351	0.11394	0.12967	0.04470	0.17161	0.08844	0.01853	0.04788	0.01414	0.36992	0.09480	0.63116	0.19382	2.26274	2.95927	3.39872	1.35684	1.98703	9.28368	0.13632	0.29811	0.12169	0.06980	0.27180	0.03585	1.327721e-16	0.05141	0.01694	0.77518	2.506163e-8	0.33333
		0.12653			0.61646	0.05436	0.12973	0.08259	0.05923	0.11897	0.12514	0.07066	0.01414	0.36030	0.17303	0.72059	0.25783	1.79104	2.69072	3.73606	0.89443	2.01993	10.71936	0.10674	0.26622	0.10329	0.06559	0.19206	0.05792	0.02396	0.06705	0.01466	0.86248	0.10645	0.23670
		0.14318			0.68893	0.05893	0.14363	0.22680	0.06714	0.19480	0.09908	0.05835	0.03462	0.33423	0.28475	0.70900	0.62111	1.21697	1.35684	4.04595	0.67862	2.41661	10.72794	0.03610	0.17930	0.12169	0.06508	0.16615	0.05141	1.336506e-16	0.04926	0.04469	0.89445	0.93399	0.19303
		0.09997			0.20144	0.06701	0.10329	0.30526	0.10329	0.14823	0.10722	0.05207	0.01414	0.24066	0.16113	0.86459	0.97346	0.99024	0.77021	4.24093	1.28062	2.81063	10.37859	0.05560	0.49891	0.04470	0.08828	0.07743	0.12183	0.04469	0.04626	0.04484	0.22787	1.04601	0.19303
		0.11985			0.51271	0.04838	0.06585	0.20810	0.16974	0.15808	0.07066	0.06320	0.01414	0.36316	0.61195	0.60294	0.69015	1.60215	0.20000	4.77760	1.00343	2.44811	9.93780	0.12235	0.65216	0.05475	0.05378	0.31679	0.06320	0.03562	0.03585	0.04469	0.09077	0.96871	0.25737
					0.82541	0.04469	0.09659	0.15646	0.22120	0.05923	0.08844	0.05105	0.01746	0.31871	0.98521	0.39930	0.81626	1.59972	0.63246	2.40832	1.16619	5.39222	7.39407	0.08355	0.55734	0.06322	0.05877	0.53998	0.06320	0.04619	0.01694	0.05792	0.30465	1.04601	0.58824
					0.33561	0.04469	0.06320	0.04838	0.09583	0.07630	0.01850	0.06476	0.03462	0.40844	1.21989	0.76386	0.46953	2.05084	0.44721	2.03961	1.12577	3.62648	5.02666	0.23005	0.45668	0.06585	0.03086	0.65798	0.06320	0.04449	0.07066	0.04469	0.20003	0.90803	0.44118
					0.79767	0.05313	0.08376	0.08259	0.07741	0.38051	0.20645	0.06476	0.05560	0.41075	1.34377	1.16669	0.74920	3.40000	0.49692	1.86340	1.51030	2.33219	2.48294	0.19584	0.34785	0.08065	0.07140	0.63952	0.09593	0.03150	0.10028	0.05792	0.32226	0.38856	0.41126
					0.49323	0.01841	0.06714	0.15908	0.05923	0.34034	0.09570	0.06469	0.05207	0.47644	1.42235	2.44374	0.51441	3.87336	0.82462	1.30929	0.95972	5.31569	1.49961	0.15713	0.03160	0.04659	0.04556	0.79286	0.06318	0.01460	0.05792	0.01694	0.30920	0.49818	0.41126
					0.28018	0.00000	0.05923	0.03421	0.11680	0.19005	0.18747	0.06557	0.05835	0.44261	1.15678	2.59139	0.78238	3.83119	0.11706	0.42495	1.36988	7.46740	1.09590	0.05835	0.17017	0.08274	0.04490	0.59488	0.06865	0.05727	0.08147	0.04854	0.35294	0.30504	0.21965
					0.45443	0.03432	0.01850	0.10481	0.04659	0.19228	0.19228	0.09480	0.02247	0.41109	1.00950	2.56370	0.50782	4.28121	0.40851	2.72029	2.53859	4.48978	1.62482	0.31305	0.23580	0.03421	0.02271	0.30982	0.07786	0.04928	0.06543	0.03160	0.10919	0.41338	0.29081
					0.39622	0.12156	0.03160	0.07741	0.01853	0.11394	0.18207	0.07734	0.04574	0.21917	0.86888	2.31803	0.56528	4.01827	0.68294	2.33238	0.52844	3.67151	1.90945	0.14125	0.30701	0.06320	0.03659	0.23689	0.06488	0.04477	0.01694	0.07066	0.22784	0.31956	0.28284
					1.09936	0.03620	0.05475	0.13029	0.14773	0.15901	0.15787	0.07929	0.01414	0.16522	0.81213	2.08698	0.39791	3.61247	0.82462	1.20570	0.52097	6.22364	2.60263	0.15800	0.29978	0.05475	0.11323	0.10870	0.13407	0.07075	0.03160	0.07066	0.10920	0.41375	0.30919
					0.66276	0.06589	0.11554	0.05178	0.21273	0.14132	0.05396	0.04574	0.06557	0.03316	0.64565	1.03737	0.23746	3.92057	0.11729	1.23052	0.63246	4.46722	2.00172	0.16204	0.25672	0.03662	0.17007	0.07066	0.11392	0.07053	0.03160	0.02240	0.40001	0.41210	0.20000
					0.36936	0.34034	0.07630	0.22345	0.12973	0.12708	0.15159	0.02000	0.05105	0.07078	0.56262	1.07440	0.17740	4.04969	0.55972	0.61131	0.82462	2.74014	1.50000	0.22034	0.11762	0.11330	0.17643	0.16974	0.06488	0.04462	0.02240	0.06488	0.44721	0.28284	0.30919
					1.20564	0.37827	0.06714	0.11405	0.18066	0.05475	0.16645	0.02247	0.04896	0.08708	0.25609	0.92897	0.25679	3.63346	1.00000	1.29882	0.11706	5.07668	1.34048	0.20093	0.06454	0.23441	0.21037	0.05475	0.14966	0.07065	0.01466	0.17576	0.22787	0.09637	0.36824
					0.35459	0.38956	0.05923	0.11330	0.11554	0.09480	0.21879	0.02247	0.04788	0.05105	0.15863	0.82277	0.21580	3.98497	0.88682	1.86366	0.48294	7.64710	2.34148	0.08189	0.13407	0.14132	0.32985	0.15800	0.12639	0.07059	0.04854	0.23005	0.29081	0.22186	0.10919
					0.58659	0.38012	0.08170	0.27193	0.04470	0.08065	0.21152	0.03160	0.05105	0.03462	0.14994	0.53841	0.22066	3.24917	1.78885	2.41662	0.55440	6.44050	1.03078	0.07742	0.11897	0.17546	0.25535	0.34433	0.09593	0.04609	0.17995	0.18960	0.20000	0.22528	0.20000
					0.44014	0.37083	0.01310	0.05923	0.03160	0.06454	0.16575	0.02247	0.04469	0.03160	0.17900	0.25679	0.13187	2.60000	0.74443	2.71706	0.71162	5.94570	1.03926	0.09440	0.14823	0.19561	0.20313	0.24789	0.08191	0.04925	0.16994	0.20426	0.12842	0.22528	0.20000
					0.05455	0.10870	0.06585	0.33290	0.09993	0.10870	0.20270	0.02247	0.02247	0.02000	0.03160	0.14661	0.05823	2.74583	0.79146	3.00179	0.82462	5.27665	2.18622	0.01746	0.34041	0.29978	0.15585	0.31372	0.11174	0.05790	0.14132	0.19222	0.31063	0.10410	0.60000
					0.61299	0.08259	0.04838	0.25280	0.05923	0.03160	0.17110	0.01453	0.06707	0.03610	0.06476	0.21205	0.19820	2.75699	1.41421	3.66667	0.49001	4.56946	3.31738	0.04788	0.19228	0.43012	0.12251	0.39087	0.03585	0.94854	0.14966	6.324686e-18	0.50557	0.20000	0.75000
					0.55894	0.02266	0.05010	0.30318	0.17546	0.03405	0.03421	0.01414	0.04788	0.04469	0.04574	0.27607	0.20127	2.93591	0.28294	3.24608	0.14347	4.09675	3.05287	0.06320	0.13968	0.35330	0.04494	0.32991	0.05602	0.94137	0.12671	0.01466	0.10919	0.22552	1.18199
					1.16409	0.08259	0.04659	0.40084	0.06714	0.14132	0.09128	0.03177	0.01414	0.07863	0.07802	0.41518	0.25681	2.61873	0.88294	3.24608	0.00000	1.29353	3.56021	0.11314	0.15315	0.33686	0.03163	0.25672	0.03585	0.94809	0.10146	0.01466	0.30466	0.10363	0.18199
					0.37820	0.15800	0.05010	0.28470	0.03662	0.07741	0.07722	0.02000	0.03462	0.04788	0.07066	0.30585	0.23929	1.93077	0.40851	0.33333	0.20000	4.16467	2.20488	0.14780	0.21855	0.72415	0.03662	0.34309	0.09593	0.92658	0.06668	0.02240	0.20000	0.40000	1.781216e-8
					0.42258	0.13950	0.11394	0.05340	0.08065	0.10790	0.02236	0.03160	0.04469	0.05835	0.08986	0.40468	0.30186	2.12100	0.80852	1.45774	0.11706	2.23607	1.06751	0.26075	0.06343	0.49565	0.05927	0.33475	0.04469	0.91011	0.08645	1.227907e-17	0.30466	0.50429	0.09081
					1.68982	0.15644	0.13534	0.07066	0.06585	0.25477	0.03636	0.01746	0.02247	0.03610	0.12235	0.62802	0.46977	2.68549	0.88294	0.57772	0.23174	0.61131	1.27302	0.20604	0.24293	0.22159	0.08057	0.23005	0.03483	0.03581	0.14391	1.315614e-17	0.09081	0.29637	0.12842
					0.22052	0.16425	0.15646	0.01310	0.08259	0.28309	0.10323	0.02247	0.06320	0.07929	0.18426	0.44652	0.48624	2.25238	1.34164	0.77021	0.66337	0.20000	1.89737	0.19986	0.17176	0.19222	0.03415	0.21709	0.02396	0.03585	0.09478	0.05071	0.14202	0.23263	0.30466
					0.25958	0.16867	0.08259	0.02267	0.03421	0.34925	0.10484	0.03160	0.06320	0.12447	0.12235	0.15800	0.46977	2.88208	0.23174	0.48995	0.55972	4.47007	1.61245	0.08938	0.33062	0.14549	0.03163	0.17930	0.03160	0.03183	0.11182	0.03160	0.10919	0.50752	0.20000
					0.11678	0.15808	0.07741	1.008638e-16	0.12505	0.55220	0.09313	0.02469	0.04906	0.29049	0.12235	0.07066	0.66308	3.64966	0.28284	1.68147	0.55440	3.23562	1.67889	0.05207	0.36118	0.20114	0.06585	0.16113	0.08403	0.05116	0.11286	0.07066	0.22787	0.50429	0.09081
					0.26644	0.14304	0.09659	0.01853	0.08938	0.64691	0.13302	0.04469	0.04906	0.40220	0.21198	0.32540	0.79995	2.80245	0.66337	1.68496	0.71162	7.49537	2.26167	0.03160	0.15800	0.12708	0.01854	0.15050	0.03483	0.10033	0.06457	0.15666	0.10919	0.14144	0.10919
					0.72340	0.13220	0.13534	0.04470	0.08844	0.45731	0.18596	0.04574	0.03160	0.47940	0.27210	0.49361	0.56968	1.52315	0.88682	1.93203	0.63246	8.91067	0.89443	0.01746	0.27331	0.15908	0.03421	0.14132	0.09630	0.05818	0.03569	0.17717	0.20000	0.30438	0.14202
					0.55333	0.12980	0.09128	0.06320	0.11762	0.45917	0.13072	0.04896	0.03610	0.40468	0.39704	0.69397	0.68361	1.40721	0.40000	4.84049	0.61131	9.11601	1.33216	0.03160	0.21748	0.15800	0.02268	0.18426	0.05602	0.07984	0.08630	0.12413	0.09081	0.20366	0.14202
					1.67241	0.11897	0.14773	0.05475	0.08259	0.17949	0.12997	0.01746	0.06317	0.38573	0.49222	0.68156	0.70096	1.32009	0.44721	4.87903	1.12318	6.91101	1.20000	0.05560	0.18347	0.23290	0.06320	0.17876	0.06865	0.05602	0.07968	0.17123	0.12842	0.14248	0.14202
					0.22840	0.04470	0.05923	0.01850	0.08065	0.03662	0.02343	0.04896	0.05830	0.16449	0.47653	0.52636	0.63709	3.80058	0.21651	5.73089	1.10125	2.79967	0.93498	0.03160	0.52116	0.24348	0.12708	0.14773	0.04626	0.03483	0.12387	0.08938	1.996701e-8	0.40254	0.30466
					0.28546	0.05806	0.11762	0.01850	0.05475	0.08274	0.20879	0.04574	0.04784	0.05835	0.66360	0.35366	0.66677	3.84594	0.49692	6.93397	0.84856	1.01980	0.21651	0.03462	0.48613	0.14765	0.08759	0.04471	0.04927	0.02240	0.09161	0.03586	0.99329	0.14233	0.10919
					2.37889	0.07308	0.04111	0.02616	0.05923	0.06320	0.06260	0.03160	0.06451	0.12764	0.60057	0.39233	0.76052	2.03508	1.12840	8.61082	1.29907	2.99954	1.12014	0.04469	0.31738	0.15050	0.12973	0.09480	0.01466	0.03483	0.07945	0.04471	1.64488	0.20008	0.28284
					0.29473	0.09128	0.04477	0.05010	0.05010	0.07741	0.15854	0.01746	0.01439	0.10201	0.50659	0.21198	0.42934	2.04845	0.92081	7.15542	0.81668	4.09534	0.48995	0.04469	0.62224	0.28152	0.11394	0.09571	0.01466	0.03483	0.05129	0.07968	2.25500	0.22877	0.44721
					0.05573	0.17787	0.08274	0.06585	2.192690e-18	0.06454	0.17637	0.01414	0.03182	0.12447	0.25280	0.12640	0.45054	1.28018	0.73623	7.87909	3.14466	5.79714	1.26491	0.03462	0.60384	0.29134	0.04469	0.06327	0.02240	0.03160	0.02240	0.12640	2.53142	0.35667	0.41018
					0.25379	0.09908	0.02616	0.46314	0.06320	0.06454	0.08666	0.01746	0.03152	0.05207	0.15863	0.03610	0.50388	0.57772	0.28284	6.98570	2.62582	2.84800	0.29484	0.03610	0.46977	0.26813	0.03421	0.13440	0.08014	0.03160	0.05599	0.13750	2.36736	0.35588	0.30919
					0.27471	0.08065	0.01317	0.17876	0.09993	0.06714	0.14546	3.310321e-3	3.380613e-3	0.03610	0.23433	0.03462	0.52484	0.77021	0.55801	3.94350	2.12603	1.98577	0.88682	0.01414	0.67353	0.16974	0.05475	0.07083	0.03160	0.03483	0.04840	0.21582	1.64727	0.19983	0.30466
					0.72096	0.07066	0.02261	0.11680	0.06320	0.01853	0.11760	0.04469	0.05207	0.01414	0.23324	0.10894	0.52205	0.77021	0.70752	1.90945	1.84391	1.67705	1.09590	0.04469	0.54820	0.18960	0.04647	0.14019	0.01466	0.04469	0.08371	0.22441	1.22041	0.19998	0.31063
					0.33882	0.12708	0.01843	0.10481	0.04470	0.04469	0.17745	0.06476	0.03160	0.03462	0.09272	0.04788	0.72903	0.23174	0.60571	0.61131	1.44729	1.78669	0.63803	0.03469	0.51828	0.05475	0.01857	0.11681	0.03585	0.03160	0.13518	0.19111	0.19982	0.14189	0.44721
					1.56307	0.13029	0.01850	0.08844	0.06320	0.06585	0.14606	0.05835	0.03160	0.03462	0.41582	0.14819	0.76246	0.23174	0.55801	0.73923	1.85659	1.80380	1.74843	0.03147	0.37572	0.08844	0.04452	0.12714	0.03585	0.03585	0.14412	0.15800	0.30920	4.952387e-6	0.12842
					0.20181	0.11244	0.03662	0.30418	0.03662	0.03662	0.04330	0.04788	0.01414	0.02247	0.40460	0.17828	0.75133	0.11706	0.33755	3.09429	1.96977	2.61535	1.69967	0.07086	0.55906	0.10329	0.04469	0.07750	0.07066	0.05602	0.18068	0.17266	0.22786	0.13399	0.09081
					0.14333	0.09480	0.05929	0.01853	0.08759	0.07742	0.03658	0.05835	0.03160	0.04896	0.52593	0.17502	0.47159	0.28968	0.52139	3.25563	3.26685	2.41662	1.41853	0.09278	0.54338	0.26527	0.09571	0.06718	0.04626	0.04469	0.11215	0.20496	0.12842	0.13401	0.12842
					2.30799	0.09570	0.07741	0.01850	0.05340	0.03421	0.06454	0.01746	0.05105	0.05560	0.54867	0.13361	0.45940	0.33333	0.36855	3.07364	4.26329	1.69478	0.82462	0.10693	0.76223	0.30526	0.10479	0.30425	0.11394	0.01466	0.32534	0.24066	0.36824	0.10333	0.21965
					0.25477	0.09574	0.07066	0.05334	0.03924	0.04470	0.15907	0.04896	0.03610	0.07066	0.45764	0.18902	0.37752	1.20185	0.68085	0.33333	4.12311	1.21655	1.20570	0.03600	0.37817	0.30832	0.06714	0.22681	0.07968	0.02240	0.31601	0.29197	0.22787	0.14190	0.12842
					0.12141	0.09572	0.05491	0.03662	0.08187	0.02616	0.07042	0.01746	0.05560	0.07802	0.33425	0.28475	0.07802	1.34629	3.54077	0.75000	4.57204	0.55440	0.52367	0.06696	0.65068	0.25477	0.13026	0.15873	0.06705	0.02240	0.29134	0.28949	0.72109	0.10333	0.20000
					0.79423	0.07066	0.05338	0.03160	0.09583	0.01850	0.04319	0.04574	0.03610	0.09272	0.34462	0.21368	0.18338	1.16619	3.54077	0.60570	5.30512	0.72111	0.52367	2.499516e-4	0.29134	0.21233	0.16017	0.11424	0.19242	0.01466	0.35832	0.22646	0.09081	0.28284	0.20000
					0.80312	0.04469	0.04479	0.03160	0.07066	0.03662	0.06929	0.03160	0.06320	0.04469	0.39740	0.19584	0.07066	0.71162	1.04513	0.71706	4.00524	1.07703	0.78403	0.03164	0.03662	0.08259	0.17546	0.09915	0.22008	0.03585	0.12267	0.15891	0.22787	0.14194	0.21965
					0.39595	0.03418	0.04838	0.02616	0.07741	0.11405	0.03658	0.00000	0.04469	0.08000	0.38970	0.20449	0.21368	1.24118	1.81673	0.73124	4.10937	0.67862	0.79206	0.03480	0.12180	0.08259	0.14649	0.44602	0.27183	0.01694	0.05141	0.27407	0.21965	0.09668	0.09081
					1.09347	0.03146	0.07066	0.01849	0.08759	0.01310	0.03407	0.03462	0.05560	0.09988	0.36202	0.03160	0.16687	1.45602	1.90764	1.61640	4.70403	0.67862	0.96932	0.06314	0.39357	0.05010	0.22120	0.58268	0.19697	0.00000	0.08014	0.13029	0.31063	0.14187	0.22787
					0.27754	0.02619	0.03440	0.01850	0.05178	0.02267	0.01685	0.03160	0.04469	0.14780	0.40413	0.20882	0.12719	1.42830	2.76989	2.13201	4.83453	0.44721	0.20000	0.08354	0.51887	0.07742	0.15800	0.51887	0.17716	0.01466	0.03483	0.15800	0.14202	0.28332	0.21965
					0.23775	0.04661	0.18960	0.02267	0.04470	0.01853	0.08781	0.03462	0.03610	0.25372	0.34720	0.37920	0.06476	1.21655	1.92215	2.15407	5.47811	0.34649	0.92081	0.14131	0.58190	0.12640	0.21198	0.45916	0.11076	0.02240	0.07066	0.11270	0.22787	0.20000	0.14202
					2.54924	0.03160	0.05475	0.03160	0.04838	0.17400	0.02498	0.03462	0.01414	0.09988	0.15896	0.56525	0.30236	1.34711	1.84391	2.00000	5.02609	0.33798	0.78403	0.20233	0.39736	0.16575	0.20645	0.69162	0.18601	0.01466	0.08623	0.14182	0.10919	2.408972e-9	0.10919
					0.32423	0.03421	0.23539	0.03420	0.06320	0.15908	0.03403	0.01414	0.04469	0.11344	0.07066	0.73150	0.26714	0.37487	2.02498	0.66337	4.43304	0.41678	1.13137	0.22787	0.21233	0.14549	0.29197	0.23659	0.04926	0.03160	0.03160	0.03585	0.24416	0.14187	0.10919
					0.08849	0.04429	0.18747	0.03160	0.03421	0.27313	0.09566	0.01414	0.02000	0.24368	0.03160	0.97196	0.23611	1.23093	2.80123	1.01408	4.23032	0.48294	1.48525	0.14994	0.17843	0.25772	0.35734	0.75972	0.04626	0.01466	0.15666	0.04626	0.41879	0.20041	0.28483
					0.88008	0.03413	0.14490	0.02267	0.04470	0.26443	0.08268	0.02829	0.01414	0.18426	0.05560	1.12606	0.23104	1.00343	4.39532	0.90531	3.16845	0.20000	1.00050	0.09585	0.31995	0.20892	0.23503	0.78179	0.04853	0.05071	0.05071	0.02240	0.22787	0.21882	0.37978
					0.82264	0.07041	0.42685	0.03160	0.03160	0.28738	0.08018	0.02247	0.13029	0.36030	0.04788	1.16192	0.27412	0.80852	5.39373	1.34164	2.90720	0.11706	0.08294	0.06557	0.11179	0.15800	0.35147	0.31627	0.05071	0.05792	0.04469	0.02240	0.30919	0.23394	5.601768e-8
					0.37571	0.06424	0.28230	0.04659	0.03160	0.06320	0.06981	0.04241	0.13066	0.52597	0.02469	1.04273	0.29473	1.63111	3.72678	2.13201	3.18457	0.29484	0.60653	0.10674	0.10329	0.10722	0.16575	0.34468	0.05792	0.05029	0.07062	0.06543	0.32791	0.51627	5.601768e-8
					1.11088	0.07064	0.14830	0.08273	0.01310	0.04470	0.15984	0.02247	0.14469	0.51994	0.17017	1.12962	0.35351	2.71259	2.72692	1.75529	4.11446	0.55440	1.33401	0.09639	0.13597	0.23539	0.29446	0.10870	0.07171	0.03469	0.07832	0.04469	0.20000	0.60724	2.97857
					0.08282	0.04469	0.09480	0.05923	0.01850	0.07741	0.17538	0.03160	0.18739	0.48917	0.09988	1.08963	0.16333	0.84853	1.93757	2.00876	4.34390	0.68795	1.38073	0.11360	0.12505	0.29214	0.29442	0.20521	0.05734	0.02232	0.02240	0.03160	0.21965	0.80578	0.00000
					0.57693	0.06580	0.04470	0.03421	0.01310	0.08759	0.16155	0.03160	0.18624	0.58805	0.06937	0.71764	0.31639	1.13137	1.24118	1.33216	4.39813	0.60000	1.87279	0.06557	0.08938	0.49082	0.22787	0.32991	0.03585	0.02397	0.06320	0.01466	0.22787	0.51627	0.18199
					2.00305	0.03657	0.02616	0.03160	0.21815	0.08759	0.10635	0.03160	0.07802	0.46090	0.09585	0.60654	0.27866	1.16619	0.79206	1.28827	3.60555	0.60000	1.88396	0.05560	0.04469	0.30454	0.34249	0.52773	0.02396	0.03162	0.23427	0.02240	0.32791	0.40505	0.19303
					0.30149	0.05337	0.05340	0.04659	0.26152	0.07630	0.07041	0.02247	0.03609	0.27832	0.07929	0.57201	0.24878	0.66337	0.65372	0.44721	4.01995	0.40013	1.84391	0.05207	0.15808	0.17637	0.20114	0.58014	0.03585	0.06521	0.22517	0.21398	0.09081	6.057066e-5	0.22787
					0.15428	0.01843	0.25259	0.03662	0.23222	0.20515	0.04581	0.04469	0.01745	0.26813	0.24580	0.33591	0.22120	1.21697	1.41421	0.49692	3.27350	0.37487	1.92215	0.09984	0.20234	0.06320	0.23580	0.44912	0.06318	0.03571	0.20494	0.24215	0.28284	0.09686	0.28284
					0.61402	0.04471	0.31105	0.01850	0.26512	0.42625	0.04581	0.01414	0.05207	0.34181	0.21198	0.14442	0.28860	2.07235	1.73966	0.90531	1.64617	0.44721	1.44222	0.11391	0.14823	0.14304	0.25276	0.54367	0.06312	0.03153	0.16467	0.24066	0.14202	0.14271	0.36824
					0.64096	0.04662	0.29411	1.519773e-17	0.24853	0.58362	0.01868	0.02000	0.04896	0.41631	0.19943	0.08355	0.20093	2.05084	2.66523	1.07703	1.60957	0.72111	1.33401	0.10247	0.15800	0.28260	0.23005	0.40513	0.08402	0.07059	0.18599	0.25141	0.35294	0.19994	0.41018
					0.37269	0.09953	0.38018	0.04659	0.06714	0.50121	0.12640	0.03610	0.03160	0.28924	0.14132	0.02000	0.34667	2.57228	2.83927	0.40000	1.65559	0.89443	1.80191	0.13825	0.20234	0.05010	0.20973	0.34925	0.05045	0.06320	0.09166	0.25011	0.35294	0.23441	0.30466
					1.12520	0.01310	0.30488	0.07085	0.08065	0.42390	0.18695	0.02247	0.03610	0.26999	0.13029	0.07863	0.13823	2.55764	2.93126	0.30620	0.61492	1.20286	0.55972	0.14496	0.10870	0.09480	0.21404	0.21273	0.03563	0.08615	0.12641	0.03585	0.28284	0.09686	0.29081
					0.12690	0.05469	0.12956	0.02267	0.05923	0.31654	0.08947	4.961496e-18	0.05105	0.38182	0.14125	0.08986	0.12313	0.89443	1.00000	0.89443	0.56325	0.80852	0.90907	0.09902	0.03662	0.11897	0.21748	0.34809	0.01466	0.06320	0.33324	0.04626	0.30466	0.32034	0.10920
					0.49982	0.02265	0.05473	0.04659	0.04469	0.08170	0.16949	0.02469	0.22788	0.32091	0.17812	0.15863	0.40291	1.34385	0.44721	0.75713	0.18685	0.90531	0.90531	0.10365	0.13660	0.08274	0.20034	0.12640	0.01470	0.03484	0.36771	0.03160	0.15442	0.40612	0.15442
					1.81562	0.02264	0.13346	0.05475	0.05010	0.18066	0.14334	0.01746	0.25024	0.12640	0.30582	0.14442	0.83718	0.20000	0.28968	1.55744	0.35359	1.00536	1.20286	0.06326	0.18066	0.12180	0.17546	0.18207	0.02075	0.09480	0.48033	0.01466	0.20000	0.32311	0.14202
					0.50087	0.10327	0.01446	0.01850	0.01850	0.13407	0.12577	0.00000	0.05835	0.16204	0.14994	0.18247	1.15858	1.00000	1.43423	1.41427	0.78691	1.00951	1.86077	0.13446	0.16113	0.20438	0.17017	0.07742	0.03460	0.01694	0.49054	0.02073	0.30919	0.78484	0.09081
					0.16651	0.06321	0.08856	0.03421	3.662778e-17	0.12169	0.15112	0.02469	0.03462	0.26751	0.16113	0.14728	1.20991	0.84828	0.98235	0.88440	0.11536	1.67239	1.81108	0.09993	0.14132	0.09993	0.15800	0.03662	3.978802e-4	0.08191	0.52969	0.00000	0.35294	0.35866	0.14202
					0.58600	0.04469	0.06898	0.03160	0.01850	0.16867	0.03619	0.02247	0.01414	0.25320	0.19504	0.13559	1.26598	1.66667	0.25000	0.95255	0.78691	2.39633	0.93447	0.07063	0.15808	0.16974	0.02267	0.12775	0.03379	0.03586	0.20445	0.02073	0.22787	0.58827	0.10922
					0.46888	0.01928	0.11390	0.05010	0.06737	0.08938	0.03414	0.02247	0.13408	0.29854	0.28075	0.10247	1.06658	1.01886	0.63246	1.21699	0.10025	1.34711	1.16619	0.03481	0.01850	0.21077	0.05340	0.14765	0.02014	0.15891	0.08193	0.01466	0.60000	0.30584	1.677631e-8
					0.37184	0.03159	0.09582	0.05178	0.15922	0.04469	0.01838	0.02247	0.13631	0.16770	0.60398	0.15800	0.94853	0.84828	0.62708	1.20570	0.19226	2.83239	1.45602	0.05106	0.13216	0.23290	0.01850	0.14363	0.01463	0.07923	0.12183	0.00000	0.30919	0.28327	0.10919
					0.99006	0.04469	0.06057	0.02267	0.19767	0.06454	0.07761	8.364450e-24	0.08189	0.12760	0.80875	0.06469	0.96829	1.15445	0.80852	2.00000	5.07040	2.83927	2.43351	0.03166	0.03160	0.11394	0.07630	0.17787	0.03445	0.20426	0.26209	0.00000	0.20000	0.63309	0.09081
					0.13195	0.04649	0.05757	0.04838	0.23906	0.04659	0.22077	0.03160	0.04788	0.06557	0.92508	0.11394	0.91940	1.48096	0.40000	2.50483	8.31428	1.68147	1.66370	0.06483	0.06320	0.18825	0.11897	0.26877	0.03556	0.15868	0.19244	0.01694	0.10919	0.09637	0.10919
					0.53500	0.06585	0.03731	0.04838	0.30385	0.03421	0.08170	4.182225e-25	0.05560	0.04906	0.95259	0.05560	0.90595	1.80380	0.89443	2.61535	12.34532	1.70880	1.35764	0.08939	0.03421	0.06714	0.20438	0.23863	0.03499	0.19222	0.19898	0.00000	0.20000	0.40504	0.10919
					0.86688	0.07052	0.09198	0.01310	0.13577	0.28789	0.06463	0.04896	0.03160	0.10247	0.60419	0.16953	0.86934	0.89443	0.82108	3.09589	12.63171	1.66751	1.41421	0.09993	0.07741	0.04838	0.19480	0.22680	0.06289	0.06488	0.24680	0.03585	0.22787	0.71227	1.546577e-8
					0.37278	0.02265	0.03652	0.03160	0.13574	0.14830	0.13022	0.01746	0.05207	1.446511e-16	0.16113	0.24657	0.79252	1.20286	2.67235	3.63466	14.12418	2.73243	0.93286	0.13564	0.15800	0.06070	0.20229	0.28470	0.09454	0.10650	0.18960	0.04469	0.29081	0.51069	0.20000
					0.62265	0.08759	0.01316	0.07066	0.08051	0.37507	0.27111	0.02000	0.05207	0.03610	0.10247	0.23800	0.81252	0.71706	2.64723	3.37076	10.54985	5.19510	1.11803	0.08000	0.03662	0.05654	0.30370	0.28615	0.03483	0.20216	0.04854	0.07066	0.80742	0.30343	0.12842
					0.41423	0.07741	0.06628	0.03420	0.15106	0.63283	0.34588	0.01414	0.05835	0.02247	0.18649	0.27792	0.81550	0.93862	2.75771	3.94005	11.55692	5.92715	0.96932	0.06320	0.05475	0.06320	0.35004	0.25672	0.01466	0.07923	0.17515	0.07786	0.60985	0.22208	0.09081
					0.46241	0.20234	0.06396	0.02266	0.10795	0.88814	0.33591	0.03610	0.06557	0.05105	0.23366	0.23975	0.70324	0.53015	1.96977	4.83735	7.79548	5.33895	0.20000	0.02000	0.10481	0.06320	0.35316	0.26778	0.08403	0.09593	0.17003	0.06320	0.52077	0.14096	0.09081
					1.31836	0.24612	0.09523	0.08375	0.11897	0.76103	0.38581	0.05560	0.05207	1.892209e-16	0.16905	0.13559	0.77090	0.80852	2.64114	3.57880	5.55364	3.92938	0.63246	0.06320	0.27965	0.01310	0.41228	0.34903	0.06488	0.08938	0.22530	0.08014	0.93093	0.22598	0.12842
					0.18950	0.18426	0.01897	0.04642	0.26406	0.85378	0.30282	0.02469	0.04469	0.09988	0.10526	0.19192	0.83495	0.11729	0.77021	2.80123	2.13600	4.19967	0.14347	0.04469	0.11897	1.557940e-16	0.40468	0.28182	0.03585	0.05071	0.21176	0.03483	0.71755	0.29657	0.10919
					0.21318	0.13534	0.01357	0.01849	0.26999	0.61730	0.14607	0.04896	0.03160	0.06557	0.06557	0.29562	0.86888	0.29484	1.01980	3.15767	2.80713	2.57911	0.56569	0.02247	0.14304	0.05923	0.37572	0.23888	0.17777	0.19960	0.23837	0.03483	0.41464	0.14205	0.09081
					0.31266	0.15050	0.15151	8.288840e-6	0.22567	0.49857	0.14773	0.04896	0.30585	0.09988	0.01746	0.07863	0.67789	0.20000	0.53015	3.72244	2.70954	0.82462	0.23174	0.03462	0.13407	0.00000	0.34925	0.12388	0.03618	0.10650	0.10212	0.02396	0.63246	0.54136	1.840601e-8
					0.39893	0.07085	0.17434	5.441752e-5	0.18960	0.22345	0.41884	0.09440	0.19382	0.11662	0.09639	0.05835	0.49964	0.33798	0.60571	4.18466	2.68742	1.11803	0.29484	0.17017	0.07742	0.02267	0.37869	0.09659	0.02240	0.07923	0.15812	0.01466	0.52999	0.54130	0.09081
					0.31360	0.01853	0.07457	0.05339	2.631229e-17	0.17685	0.15164	0.09440	0.32534	0.03610	0.13442	0.11033	0.31758	0.08294	0.23174	4.80416	1.05409	0.57748	0.28284	0.23433	0.17210	0.01850	0.34468	0.05923	0.03160	0.06543	0.12472	0.03585	0.22787	0.20001	0.09081
					0.24099	0.05923	0.19286	0.03647	0.02616	0.08065	0.45537	0.06707	0.31122	0.10986	0.29086	0.05560	0.25679	0.23174	1.26800	4.75078	0.98004	1.56357	0.16555	0.19222	0.06320	0.02616	0.34163	0.12169	0.02240	0.06705	0.08973	0.03168	0.12842	0.20001	0.14202
					0.54034	0.10329	0.14185	0.02270	0.04470	0.11762	0.36094	0.04906	0.32042	0.08662	0.07066	0.12640	0.75906	0.16555	1.70110	4.80416	0.93498	1.11333	0.63246	0.19986	0.03662	0.01853	0.30141	0.12388	0.15891	0.06303	0.07836	0.03160	1.578713e-8	0.50431	0.10919
					1.79320	0.15646	0.28232	0.03159	0.04470	0.05475	0.66373	0.10825	0.10526	0.08355	0.14819	0.08986	0.75860	0.44721	1.79104	3.48490	1.20570	1.04906	0.48995	0.19986	0.03662	0.06322	0.17017	0.09659	0.07950	0.03133	0.14810	0.03483	0.20000	0.28297	0.25000
					0.30994	0.08938	0.31316	0.01849	0.05340	0.06320	0.62325	0.05105	0.07802	0.06557	0.15800	0.06476	0.64555	0.40966	1.34164	2.40832	0.58941	0.89443	1.21655	3.952929e-17	0.05923	0.05010	0.15808	0.10329	0.19222	0.03547	0.14471	0.05071	0.40000	0.39997	0.18199
					0.19598	0.12973	0.34246	0.05912	0.08759	0.04105	0.23467	0.05560	0.06557	0.17017	0.29888	0.01746	0.77586	0.19549	1.14342	2.88208	0.53015	0.72111	1.41421	0.03462	0.09659	0.08844	0.14773	0.09908	0.16113	0.07930	0.11386	0.07923	0.50557	0.22869	0.18199
					0.42156	0.11394	0.14016	0.02259	0.05010	0.05178	0.06585	0.05754	0.07864	0.14442	0.21198	0.03610	0.44274	0.81659	0.17933	3.33598	0.79146	0.20000	1.97622	0.01414	0.03421	0.14132	0.10329	0.09993	0.17017	0.03469	0.14377	0.12183	0.57049	0.20014	0.17752
					0.33516	0.10481	0.24198	0.03162	0.04838	0.09570	0.12973	0.03160	0.06320	0.09988	0.28615	0.11576	0.18960	0.43311	0.87279	2.69072	0.82108	0.23174	2.21812	0.05560	0.05475	0.16113	0.05010	0.08065	0.19898	0.05793	0.11406	0.10946	0.41126	0.31022	0.21965
					0.11646	0.30414	0.10481	0.01851	0.05802	0.12775	0.14072	0.05105	0.08950	0.12235	0.15800	0.17140	0.15863	0.34649	3.47431	2.43351	1.56891	1.97622	3.02655	0.02000	0.07066	0.17746	0.09993	0.03160	0.07923	0.04467	0.03412	0.14966	0.43085	0.59985	0.28284
					0.10554	0.24613	0.09570	0.03160	0.06714	0.14012	0.09993	0.05560	0.03462	0.03610	0.24680	0.18045	0.37233	0.99024	2.27763	1.81700	1.57700	1.44222	0.71162	0.04788	0.03421	0.15808	0.12973	0.08170	0.03483	0.05073	0.02282	0.13751	0.77517	0.60109	0.09081
					0.53642	0.20521	0.10722	0.02603	0.03662	0.15854	0.06585	0.04906	0.03160	0.02247	0.13361	0.13632	0.75133	1.60000	1.80191	0.92450	1.44222	2.13201	0.40013	0.05105	0.03421	0.10722	0.08065	0.09993	0.05071	0.04926	0.12439	0.06543	0.63316	0.72068	0.21965
					1.80533	0.18425	0.08065	0.08753	0.05923	0.16575	0.09128	0.06557	0.04906	0.01746	0.19584	0.16449	0.87379	1.51706	1.76996	0.44721	1.67130	1.98703	0.82462	0.03160	0.03662	0.09659	0.14012	0.19133	0.04469	0.04468	0.15683	0.06320	0.40000	0.42223	0.20000
					0.26419	0.18426	0.08065	0.09480	0.03662	0.15901	0.44912	0.02000	0.06320	0.09993	0.33704	0.23433	1.09353	1.40489	1.09590	0.60571	2.58759	2.99318	2.03961	0.01414	0.05475	0.05340	0.12180	0.31918	0.03585	0.02239	0.23774	0.05602	0.41464	0.31308	0.10919
					0.09105	0.07624	0.11244	0.09480	0.07851	0.09908	0.28298	0.04469	0.05560	0.02246	0.44689	0.41681	1.02882	1.61245	0.56569	1.33401	2.08622	3.61556	2.08459	0.03462	0.03160	0.06714	0.18066	0.35330	0.14845	0.04469	0.17882	0.06320	0.57049	0.31226	2.186506e-9
					0.54343	0.01847	0.15808	0.10947	0.06320	0.08376	0.47400	0.01746	0.04574	3.310566e-3	0.47691	0.45647	0.96730	3.02477	0.95255	2.35403	1.81108	5.67459	0.28294	0.04788	0.03160	0.11897	0.20851	0.46050	0.20496	0.03484	0.13499	0.04854	0.41464	0.41120	0.18199
					0.26086	0.02267	0.13029	0.09997	0.08274	0.08170	0.63544	0.03160	0.03160	0.09486	0.55824	0.56528	0.84909	1.54099	0.14347	2.07967	3.17428	7.53774	0.72184	0.05207	0.04838	0.08759	0.11846	0.31915	0.15457	0.02240	0.12609	0.01466	0.40000	0.32429	1.26392
					0.22611	0.02267	0.04470	0.03160	0.03421	0.16575	0.70796	0.05560	0.08252	0.27117	0.27432	0.49440	0.69820	1.06751	0.34649	2.56411	3.93954	9.25383	1.33216	0.11226	0.07066	0.20758	0.33765	0.19222	0.17935	0.08938	0.07967	0.03483	0.32225	0.22176	1.26392
					0.30945	0.16619	0.03160	0.03655	0.09993	0.18207	0.08759	0.01414	0.04469	0.32226	0.56201	0.36312	0.63594	1.07433	0.33798	2.56924	3.55668	10.11414	2.34094	0.14125	0.08065	0.26590	0.46977	0.09570	0.19572	0.08403	0.15802	0.04469	0.09081	0.29716	0.15135
					0.08719	0.06455	0.02616	0.05477	0.06454	0.28789	0.54550	0.03610	0.03160	0.19311	0.77643	0.12760	0.54957	0.99024	0.79206	1.89737	4.25790	11.08956	1.53594	0.08938	0.07066	0.30370	0.45660	0.15260	0.11612	0.14966	0.13598	0.03483	0.12842	0.31416	0.16053
					0.41355	0.04659	0.01310	0.03421	0.16167	0.27331	0.31915	0.03462	0.00000	0.07066	0.77769	0.01453	0.36852	0.74443	1.16619	1.55769	4.63349	11.74289	0.48294	0.14994	0.04659	0.30757	0.43742	0.17650	0.02396	0.09253	0.14136	0.04469	0.32791	0.23539	1.749219e-9
					2.00088	0.05923	0.13029	0.03421	0.29811	0.32226	0.51828	0.04469	0.04574	0.01746	0.53489	0.06021	0.12447	0.55440	0.11729	1.88680	4.47214	11.56640	0.86453	0.14442	0.04838	0.30930	0.41384	0.38182	0.42135	0.11393	0.13522	0.03160	0.32225	0.21314	1.749219e-9
					0.19772	0.06714	0.05010	0.02267	0.26443	0.31236	0.58268	0.03462	0.05105	0.11175	0.97126	0.08000	0.06476	0.34649	0.21651	1.62482	3.02528	12.15401	3.18457	0.09644	0.20034	0.11330	0.34767	0.27549	0.57605	0.03585	0.06545	0.03160	0.10919	0.23539	3.498421e-9
					0.41017	0.03421	0.03160	0.03660	0.20234	0.43046	0.76430	1.754152e-18	0.01414	0.06707	0.94487	0.14054	0.12760	0.52271	0.34649	1.49961	4.23171	12.06660	3.85659	0.13823	0.12180	0.10481	0.46050	0.28298	0.56016	0.07066	7.957243e-5	1.221625e-17	0.21965	0.31416	0.12842
					0.47875	0.07066	0.03421	0.03659	0.22867	0.25776	0.53813	0.02247	0.01414	0.14995	0.86746	0.56781	0.01746	1.03926	0.63246	2.32213	3.70460	10.47871	3.82099	0.14132	0.19611	0.51441	0.27098	0.82104	0.55888	0.02240	0.10000	0.09593	0.29081	0.30753	2.036082e-8
					0.14286	0.03160	0.04469	0.03659	0.12514	0.24348	1.07254	0.02247	0.03462	0.04577	0.76886	1.04328	0.03610	0.58941	0.96932	1.51193	4.80833	8.80227	2.95098	0.14132	0.41290	0.64452	0.14773	1.17172	0.60286	0.04626	0.01503	0.08615	0.20000	0.09310	0.12842
					0.09930	0.18240	0.09659	0.02270	0.07066	0.17017	0.37507	0.03610	0.01414	0.10526	0.83924	1.06618	0.09440	1.09590	0.93447	2.75771	3.92902	7.86452	4.60900	0.09993	0.49119	0.62084	0.32534	0.72435	0.16223	0.17555	0.04469	0.07969	0.09081	0.10250	0.14202
					0.37201	0.19090	0.02267	0.01310	0.05474	0.28152	0.20687	0.03462	0.03160	0.08662	0.59649	0.86055	0.01746	1.66370	0.84856	2.05084	4.80416	7.10899	3.96326	0.13347	0.61378	0.57610	0.20034	0.78356	0.05602	0.06320	0.11393	0.05602	0.32791	0.36055	0.09081
					0.10649	0.14073	0.01850	0.01850	0.03662	0.66250	0.27756	0.01414	0.02000	0.13029	0.30516	0.92576	0.15713	1.56205	0.86453	1.62663	4.56070	5.11699	3.53562	0.04896	0.64524	0.61724	0.12514	0.75638	0.03160	0.04469	0.05602	0.06488	0.15442	0.21871	4.697348e-9
					0.52252	0.16227	0.02616	0.03160	0.05475	0.49119	0.46358	0.01746	0.05560	0.04784	0.29835	0.69592	0.34585	0.67862	0.58941	1.52315	5.57476	3.13859	3.18826	0.04469	0.47505	0.20234	0.18735	0.24607	0.05792	0.02396	0.07066	0.05071	0.29081	0.22903	0.14202
					2.21273	0.10722	0.03160	0.03657	0.07741	0.13407	0.18426	0.03767	0.08252	0.17857	0.40557	0.28264	0.20653	1.42830	1.21655	3.67151	5.68354	2.94572	3.33146	0.05379	0.36987	0.05923	0.12388	0.18066	0.07066	0.04469	0.04853	0.06488	0.14202	0.44721	0.20000
					0.09141	0.06714	0.01310	0.04462	0.14304	0.26877	0.14765	0.03324	0.07066	0.19150	0.33778	0.25025	0.29086	1.12577	2.42085	2.76952	6.31506	1.55769	2.03939	0.06772	0.28264	0.08274	0.31677	0.05923	0.07066	0.19912	0.03483	0.06320	0.28284	0.22500	0.22787
					0.54550	0.05923	0.03160	0.01311	0.24487	0.55659	0.21273	0.03160	0.03160	0.31600	0.29978	0.35807	0.40220	0.44721	4.22767	1.44222	7.02038	0.90907	1.11051	0.04469	0.34163	0.04469	0.31395	0.05010	0.05792	0.09993	0.06488	0.17266	0.28284	0.22557	0.20000
					0.05542	0.07060	0.03662	0.21860	0.20645	0.55928	0.39874	0.06932	0.01746	0.32540	0.51051	1.00356	0.23611	0.23174	2.78780	2.31391	6.15895	0.28294	1.12840	0.05560	0.35147	0.15800	0.34163	0.01310	0.08621	0.07066	0.03585	0.19222	0.10919	0.09310	0.22787
					0.41520	0.09480	0.01850	0.24386	0.20498	0.36746	0.28878	0.06707	0.04788	0.52956	0.41645	1.58334	0.76500	1.40281	2.91807	2.99318	4.56946	0.23174	1.13137	0.02000	0.20270	0.16974	0.17315	0.04469	0.04622	0.05792	0.02240	0.19222	0.10922	0.20000	0.14202
					0.14721	0.19222	0.03160	0.20516	0.22735	0.08259	0.41101	8.364450e-24	0.03610	0.64420	0.34903	2.33963	1.04980	2.80713	2.56924	3.39339	2.85692	0.21651	2.12603	0.04469	0.19986	0.07741	0.17315	0.04659	0.04818	0.07923	0.04854	0.25280	0.12753	0.29277	0.20000
					0.18622	0.08274	0.07083	0.20880	0.11918	0.51703	0.57791	0.01414	0.24805	0.47270	0.42981	3.18544	0.73033	2.92391	3.03862	4.69646	1.33216	0.21651	3.23562	0.03610	0.18347	0.09570	0.12514	0.06320	0.04430	0.19915	0.03160	0.25280	0.32495	0.20000	0.22787
					0.39971	0.11480	0.10723	0.22378	0.01853	0.09570	0.50820	0.03462	0.12447	0.47126	0.33704	3.15370	0.45224	3.00115	4.19791	7.06824	0.16555	0.00000	4.10378	0.03462	0.10948	0.03662	0.10948	0.06585	0.03487	0.09175	0.04469	0.07832	0.30469	0.32043	0.10919
					1.80382	0.22787	0.14773	0.01856	0.01310	0.07066	0.34634	0.03462	0.14129	0.40291	0.14455	2.27681	0.65755	3.50892	1.05186	7.83227	0.52367	0.72111	4.32117	0.04469	0.08259	0.02267	0.13407	0.13534	0.02303	0.05602	0.03483	0.08614	0.30469	0.10375	0.09081
					0.10934	0.14767	0.13660	0.02625	0.02267	0.06320	0.27756	7.016610e-17	0.11662	0.42942	0.14132	1.90924	0.52307	2.42231	0.77021	8.50882	0.20000	0.28284	4.25520	0.05105	0.06454	0.05923	0.06320	0.08376	0.01459	0.10448	0.07066	0.06320	0.14209	0.41433	0.09081
					0.85120	0.11246	0.13597	0.04467	0.02616	0.07066	0.26527	0.01414	0.12883	0.55527	0.35330	1.21501	0.63540	1.31842	1.42830	8.24788	0.20000	0.34649	4.89819	0.05835	0.04659	0.04503	0.04470	0.12775	0.02278	0.06543	0.08621	0.04852	0.36646	0.50267	0.09081
					0.11486	0.10038	0.08745	0.06343	0.03160	0.09480	0.05475	0.01746	0.08252	0.58150	0.53944	0.75198	0.42981	2.11918	2.11869	8.72373	0.11706	0.34649	5.11077	0.06320	0.02267	0.04105	0.08376	0.11405	0.04932	0.27143	0.04444	0.03586	0.27993	0.10375	0.20000
					0.84953	0.11771	0.05335	0.03206	0.05923	0.03662	0.05178	0.04574	0.03610	0.79000	0.48339	0.62932	0.25783	1.31606	2.06576	8.94427	0.27064	0.44721	5.09787	0.04788	0.03421	0.06070	0.04469	0.09128	0.03117	0.03483	0.03585	0.03585	0.10909	0.43323	0.09081
					1.18229	0.17311	0.04469	0.03418	0.03160	0.08376	0.03421	0.06476	0.05108	0.63200	0.47691	0.23427	0.08189	1.00000	1.56205	8.54400	0.00000	0.16555	3.57413	0.03610	0.10481	0.14304	0.04470	0.05923	0.02247	0.07832	0.03160	0.01466	0.30916	1.31533	1.678718e-8
					0.22770	0.07071	0.03423	0.10190	0.04838	0.05475	0.01310	0.01746	0.07929	0.40468	0.50659	0.03492	0.05835	0.83380	0.33798	7.72351	12.98289	0.68795	3.80228	0.01414	0.02267	0.17161	0.01850	0.09128	0.02235	0.03483	1.923578e-17	0.03483	0.22788	1.49247	0.10919
					0.14023	0.06706	0.03160	0.05010	0.31915	0.01310	0.01850	0.03160	0.07734	0.20829	0.13559	0.19059	0.06476	0.41733	0.44721	8.02405	9.08951	0.72184	3.94280	4.385381e-18	0.01310	0.31627	0.04470	0.11762	0.01399	0.04853	0.01845	0.07923	0.09081	1.59258	0.12842
					0.29901	0.04325	0.03662	0.01850	0.30701	0.12514	0.03662	0.01414	0.08189	0.29386	0.07802	0.26927	0.07802	1.20000	0.44721	7.51629	5.47152	0.90230	5.08865	0.05560	0.01850	0.22867	1.845641e-16	0.18735	0.09980	0.04626	0.01648	0.04926	0.22787	1.36235	0.21965
					1.64536	0.01295	0.04469	0.03421	0.28615	0.03421	0.01850	0.01414	0.03160	0.06707	0.06557	0.22787	0.04469	1.00629	1.15445	6.26926	6.61285	1.20307	0.85070	0.02247	0.20880	0.16113	0.06585	0.19986	0.03602	0.01694	0.06497	0.04926	0.14202	0.99043	0.14202
					0.09478	0.11762	0.05475	0.03160	0.33823	0.08759	0.02616	0.03160	0.04894	0.12882	0.07734	0.07734	0.14819	1.88868	1.78176	5.97908	2.04845	0.62479	0.93054	0.04469	0.23853	0.05923	0.04470	0.18961	0.04627	0.02240	0.02245	0.06543	1.035078e-6	0.49969	0.14202
					1.24872	0.09607	0.06588	0.11394	0.30618	0.10481	0.03421	0.03462	0.04466	0.50297	0.19010	0.07734	0.08355	0.00000	1.15234	6.11958	1.82210	0.43311	0.93498	0.03160	0.24005	0.12775	0.10791	0.15050	0.03623	0.05602	0.01466	0.01466	0.10922	0.41613	0.09081
					0.14906	0.03143	0.07630	0.08274	0.05340	0.03160	0.03421	0.03160	0.04466	0.53592	0.31895	0.07863	0.06320	0.14661	0.84853	6.46985	2.61873	0.74443	0.32773	0.05105	0.26778	0.14830	0.08259	0.17685	0.03602	0.02396	0.04854	0.05602	0.22787	0.32389	0.25000
					1.06957	0.05331	0.05340	0.09908	0.07742	0.03662	0.01850	0.03610	0.01411	0.25212	0.29679	0.22773	0.07929	0.14347	1.97622	6.15463	3.23110	1.63111	0.79057	0.06476	0.28878	0.08065	0.13029	0.18207	0.06802	0.05071	0.02241	0.07066	0.10919	0.36980	0.15135
					1.38383	0.07312	0.06320	0.03421	0.06320	0.23399	0.04838	0.01414	0.07863	0.24066	0.28440	0.27866	0.05207	0.28284	1.82745	0.33333	3.93743	3.31913	1.21093	0.09993	0.08274	0.20438	0.11330	0.31915	0.08332	0.07923	0.04634	0.07066	0.14202	0.22946	0.50776
					0.19128	0.07318	0.09908	0.04838	0.01850	0.21855	0.04838	0.05207	0.02470	0.12235	0.29355	0.25320	0.08355	0.60653	2.60000	1.86554	1.12577	3.60555	0.69463	0.13559	0.12640	0.25324	0.10722	0.25776	0.05128	0.03483	0.05586	0.07969	0.20000	0.10941	0.51408
					0.22200	0.13424	0.02267	0.03662	0.03421	0.12169	0.12505	0.02469	0.03467	0.05835	0.39666	0.23977	0.08355	0.48995	2.91824	2.42548	2.40143	4.52818	1.31133	0.08000	0.15908	0.37543	0.15050	0.26058	0.06559	1.087575e-16	0.05065	0.03585	0.10919	1.321096e-8	0.52999
					0.34727	0.06586	2.833920e-17	0.04470	0.03421	0.05802	0.15808	0.02469	2.872551e-5	0.14132	0.55484	0.07066	0.02000	0.31706	2.72029	2.61535	0.66337	6.90771	1.41421	0.13632	0.18347	0.27965	0.11480	0.23467	0.11360	0.05141	0.08409	0.03160	0.20000	0.13142	0.49081
					1.52803	0.04838	0.07066	0.23005	0.01310	0.17033	0.11554	0.04469	0.08191	0.15410	0.68106	0.11394	0.06320	0.51042	0.44721	2.76849	1.61245	5.88554	1.45602	0.03462	0.23960	0.16376	0.08259	0.26058	0.15139	0.04469	0.17902	0.00000	0.10919	0.09101	0.44721
					0.04000	0.01850	0.06320	0.05475	0.01310	0.17843	0.13660	0.04788	0.18249	0.25372	0.61955	0.24364	0.01414	0.44721	2.00998	2.81009	1.60489	5.41908	1.71254	0.13442	0.36869	0.05923	0.04659	0.07741	0.17536	0.04853	0.13499	0.00000	0.14202	0.19836	0.20000
					1.44429	0.02616	0.01850	0.01850	0.03160	0.12640	0.13660	0.03461	0.17145	0.20234	0.77720	0.38443	0.03462	0.20000	1.00343	1.41421	0.92081	5.41908	1.78669	0.15800	0.31654	0.04469	0.04838	0.05340	0.04493	0.04854	0.23860	0.02396	0.21965	0.21710	0.09081
					0.05429	0.03662	0.02267	0.09908	0.01853	0.01310	0.06322	0.13837	0.12896	0.04906	0.79132	0.22165	0.09639	0.21651	3.21490	2.43311	0.21651	2.88303	1.73966	0.09639	0.22567	0.08938	0.05475	0.05475	0.05575	0.06488	0.27024	0.01694	0.21965	0.44687	0.20000
					1.26073	0.02616	0.03661	0.09570	0.07066	0.10791	0.12640	0.11948	0.11344	0.04469	0.72749	0.16001	0.04574	0.08294	3.56090	3.78730	0.49001	4.40139	2.11845	0.17592	0.22345	0.15800	0.07066	0.02930	0.05792	0.07066	0.17184	0.01694	0.41018	0.44760	0.30466
					1.69010	0.03160	0.05923	0.09480	0.03421	0.12505	0.10948	0.14404	0.05835	0.01414	0.74698	0.05105	0.07929	0.32773	5.66789	5.12640	0.44721	4.61091	2.46735	0.04574	0.19986	0.07066	0.03421	0.08844	0.06309	0.07969	0.12224	0.03160	0.51723	0.58494	0.30919
					0.10120	0.03160	0.03160	0.20234	0.01853	0.06320	0.08376	0.11345	0.04906	0.14162	0.85443	0.05207	0.07066	0.20000	7.37260	4.98857	1.11051	5.48356	2.88021	0.08938	0.15808	0.22197	0.01310	0.07630	0.04664	0.01694	0.19895	0.03585	0.50919	0.56569	0.30466
					0.25834	1.140199e-17	0.02267	0.05475	0.04838	0.08968	0.08170	0.11816	0.04896	0.12640	0.80565	0.10526	0.10526	0.14347	0.23911	5.29251	1.34385	7.02038	2.55726	0.03610	0.10722	0.11405	0.02267	0.01310	0.05602	0.06705	0.08381	0.01466	1.00000	0.35883	0.36824
					0.34858	0.02267	0.04838	0.06454	0.01310	0.13407	0.11394	0.09993	0.03160	0.13823	0.74698	0.08938	0.07863	0.20000	0.40966	4.34994	0.84853	5.84007	2.46025	0.04906	0.20234	0.15800	0.05923	0.01850	0.04469	0.11333	0.10644	0.01466	0.60000	0.21865	0.20000
					1.52039	0.02267	0.03160	0.10870	0.04838	0.07066	0.17876	0.09273	0.06329	0.05207	0.61650	0.04788	0.11367	0.21651	0.28284	4.25619	1.24118	3.60555	2.49235	0.04469	0.13407	0.03661	0.11179	0.02267	0.03585	0.03483	0.10987	0.02073	0.63246	0.10307	0.10919
					0.05737	0.01310	0.03421	0.04838	0.06320	0.02267	0.12640	0.04780	0.06924	0.09440	0.41334	0.12595	0.28471	0.08294	0.32773	3.26281	1.07433	3.33732	2.86324	3.508305e-17	0.10722	0.08844	0.12514	0.03924	0.04469	0.12838	0.09517	0.03160	1.40420	0.14234	0.29081
					0.68136	0.02267	0.04469	0.12973	0.03160	0.07085	0.38743	0.05559	0.04586	0.05560	0.36217	0.77765	0.22564	0.41678	0.65372	2.81651	0.49692	0.65372	2.52677	0.03160	0.09583	0.24005	0.07066	0.18747	0.07066	0.06488	0.09546	0.03160	1.70194	0.14150	5.807064e-9
					0.36283	0.03160	0.05475	0.09993	0.03160	0.26567	0.37820	0.04469	0.04788	0.12447	0.29875	1.65267	0.32351	0.80429	0.34649	1.81108	0.23174	0.79057	2.60768	0.01746	0.15545	0.17315	0.07742	0.08759	0.06488	0.06320	0.07169	2.637069e-17	1.30585	0.19983	0.29081
					1.01160	0.04469	0.03147	0.09993	0.03160	0.25477	0.43046	0.06476	0.04788	0.16492	0.13442	2.17673	0.40239	0.49001	1.37093	1.31706	0.51042	1.04513	2.11062	0.06320	0.18961	0.28738	0.07630	0.03662	0.15800	0.08600	0.14484	0.01466	1.41419	0.22890	0.31063
					1.71822	0.05923	0.06278	0.05923	0.03160	0.26590	0.46010	0.06476	0.14693	0.04896	0.03160	1.79512	0.43510	0.82462	1.93759	1.00000	1.28062	0.38623	1.40281	0.02469	0.19442	0.19986	0.18961	0.03160	0.09630	0.09602	0.17848	0.02240	1.40423	0.22891	0.20000
					0.83400	0.08065	0.03168	0.11394	0.05010	0.28615	0.30618	0.01746	0.09988	0.08355	0.05207	1.79850	0.34349	0.97033	1.48360	1.00343	0.65372	0.40966	0.72656	0.04469	0.24680	0.24789	0.09993	0.09128	0.11076	0.01464	0.18912	0.02073	0.63249	0.15250	0.09081
					0.18984	0.16867	0.04670	0.07066	0.01310	0.34041	0.17971	0.03160	0.18902	0.09639	0.03160	1.45069	0.56590	0.63246	1.23813	0.82462	2.06576	0.08294	0.77086	0.05207	0.22077	0.07630	0.10481	0.06585	0.19222	0.05101	0.13257	8.770762e-18	0.44716	0.14973	0.10919
					0.22076	0.12169	0.08075	0.09313	0.02267	0.02267	0.17876	0.05560	0.21624	0.05560	0.07929	1.62834	0.65314	0.95972	1.89428	0.93498	0.72111	0.44721	0.63246	0.00000	0.24612	0.27487	0.09583	0.05178	0.16113	0.01470	0.18289	0.04626	0.32411	0.14972	0.22787
					0.47668	0.08064	0.08865	0.10870	0.02267	0.08376	0.04659	0.01414	0.31600	0.20784	0.04906	1.69736	0.73920	0.83644	0.44719	0.79206	1.00050	0.33798	0.49001	0.03462	0.17876	0.19611	0.12180	0.11405	0.08403	0.03180	0.18235	0.01694	0.60688	6.612152e-6	0.10919
					1.29206	0.05922	0.08088	0.09480	0.06714	0.11244	0.03160	0.03462	0.31305	0.28622	0.05835	1.66967	0.30324	0.95255	0.57774	0.51042	1.28294	0.37487	0.68294	0.07066	0.16619	0.33501	0.36560	0.28298	0.14846	0.02107	0.19773	0.05071	0.50923	0.09734	0.15442
					0.16424	0.07740	0.05920	0.10791	0.09313	0.03421	0.04469	0.06557	0.23804	0.33417	0.06924	1.76338	0.25212	1.67799	0.21653	0.53015	1.57295	0.90819	0.85660	0.07929	0.09313	0.40600	0.10791	0.26058	0.17876	0.03332	0.16879	0.07969	0.49914	0.01239	0.28284
					0.74175	0.11244	0.01312	0.09570	0.06454	0.03421	0.02267	0.03462	0.24941	0.34924	0.05560	1.39125	0.23433	1.41492	6.249717e-5	0.52367	1.16619	0.69463	0.62708	0.09488	0.05923	0.46010	0.14549	0.17017	0.09175	0.05064	0.08710	0.06705	0.54706	6.612152e-6	0.35355
					0.23388	0.14550	0.03422	0.11179	0.04659	0.16113	0.03160	0.05560	0.32533	0.25477	0.06557	1.18546	0.09585	1.23093	0.60000	0.73124	1.21697	3.33543	0.41678	0.01463	0.08259	0.28152	0.11394	0.12180	0.14480	0.03157	0.04977	0.05792	0.63316	0.09734	0.37978
					1.03111	0.12774	0.08271	0.12775	0.03421	0.45668	0.03662	0.02247	0.28234	0.18426	0.03177	1.15630	0.09993	1.00000	0.88403	1.81887	1.75333	2.23575	0.33798	0.17218	0.06585	0.02267	0.14765	0.09480	0.10650	0.02459	0.05132	0.07969	0.64752	0.21909	1.402229e-8
					1.75905	0.14607	0.10336	0.12708	0.03662	0.70375	0.04470	0.02247	0.11344	0.08355	0.03610	1.00234	0.12235	0.44721	1.83864	0.91706	1.34639	1.38073	0.23174	0.29983	0.04659	0.23863	0.11244	0.14304	0.06865	0.03172	0.08530	0.10028	0.12842	0.20000	0.11351
					0.07611	0.12910	0.07062	0.09908	0.06320	0.67683	0.12169	0.04896	0.09992	0.08189	0.05105	0.29857	0.19311	0.20000	1.60489	0.14347	0.95972	1.92215	0.28284	0.33160	0.14773	0.35330	0.11479	0.03662	0.11173	0.03417	0.15114	0.03483	0.10919	0.28378	0.09081
					0.19880	0.06226	0.06305	0.09996	0.03662	0.03662	0.03662	0.01746	0.10525	0.09993	0.03160	0.92293	0.36030	0.20000	1.49925	0.41678	1.00050	1.61245	0.48995	0.34804	0.15646	0.79377	0.08274	0.09993	0.18426	0.05602	0.18386	0.03483	0.22787	0.31651	0.22787
					0.64356	0.04659	0.07740	0.08259	0.03662	0.49410	7.155566e-17	0.03901	0.17228	0.03610	0.04469	1.27397	0.45940	0.55972	0.96582	0.52271	1.52315	1.72047	0.74443	0.23866	0.24066	1.04710	0.08937	0.06714	0.12838	0.07066	0.15645	0.03483	0.22787	0.32016	0.15442
					1.69077	0.06320	0.06712	0.07066	0.12505	0.40270	0.16867	0.06651	0.24822	0.04469	0.07929	1.29134	0.56535	0.28284	0.48995	1.26800	0.92450	2.18913	0.20000	0.12760	0.13407	1.28321	0.26567	0.02267	0.10206	0.04924	0.17920	0.02073	0.22787	0.35131	0.20000
					0.07710	0.06454	0.07082	0.04838	0.03160	0.59227	0.29978	0.06315	0.11598	0.05835	0.14780	1.37019	0.49361	0.20000	0.23174	0.74443	0.40000	1.72047	0.65459	0.03610	0.15050	1.42651	0.21198	0.08065	0.15457	0.05071	0.20684	0.03585	0.20000	0.35131	0.20000
					0.12199	0.05923	0.08053	0.04470	0.03661	0.65498	0.31620	0.03160	0.06038	0.01746	0.03160	1.39467	0.69179	0.34649	0.37487	0.32773	0.62708	1.56891	0.56330	0.04469	0.20438	1.52320	0.31224	0.34903	0.11394	0.04922	0.14500	0.01694	0.22787	0.20000	0.28284
					0.33537	0.12505	0.07052	0.03421	0.02616	0.33582	0.27183	0.06315	0.04726	0.04469	0.17549	1.59803	0.61752	1.12318	0.21651	1.12014	1.61245	0.88294	0.68085	0.04469	0.20973	1.20613	0.29450	0.47664	0.07066	0.01708	0.09705	0.03585	0.22787	0.22925	0.12842
					1.43412	0.14765	0.06713	0.09659	0.08759	0.65333	0.17017	0.08361	0.03767	0.05835	0.24119	0.76430	0.42396	1.09590	0.20000	1.62663	1.74609	0.56569	0.50000	0.05560	0.22077	1.11483	0.27184	0.79063	0.15800	0.03679	0.02224	0.03585	0.15442	0.35928	0.12842
					0.54287	0.11680	0.02616	0.04470	0.10667	0.53555	0.21855	0.03462	0.19652	0.03610	0.26058	1.06252	0.30073	1.11929	0.21651	2.38003	2.12466	1.35684	0.51706	0.05835	0.15800	0.75530	0.16575	0.99818	0.12640	0.01465	0.04838	0.04854	0.09081	0.21905	0.10919
					0.03846	0.19228	0.08940	0.03661	0.23689	0.56541	0.24789	0.03617	0.07066	0.03462	0.12719	0.69520	0.31600	1.20570	1.28062	4.02469	1.95264	0.83644	0.37487	0.05835	0.04469	0.51767	0.22345	0.95151	0.14409	0.05136	0.06377	0.01466	0.28284	0.31092	0.14202
					0.30707	0.18393	0.12723	0.08844	0.21438	0.69857	0.19986	0.04906	0.03160	0.02247	0.19504	0.66660	0.14132	1.21655	0.55440	4.53431	2.99594	0.00000	0.52367	0.05835	0.01310	0.77953	0.28878	0.71007	0.14455	0.04853	0.12756	0.14132	0.21965	0.22071	0.32225
					0.22345	0.10722	0.14830	0.07066	0.19442	0.34246	0.26622	0.04473	0.03160	0.03610	0.20234	0.44911	0.16953	0.11729	1.08925	4.65366	4.32869	1.61640	0.40851	0.07802	0.10722	0.80835	0.32222	0.44689	0.09993	0.03483	0.12725	0.21181	0.22787	0.09659	0.21965
					0.46661	0.05340	0.13408	0.06454	0.09908	0.33172	0.08187	0.04462	0.10526	0.04896	0.07066	1.31152	0.11344	0.29484	0.82460	4.56070	2.68294	2.44471	0.60000	0.07066	0.22159	0.28903	0.32222	0.12640	0.08615	0.06488	0.18155	0.21181	0.10919	0.08858	0.21965
					1.71900	0.03662	0.12709	0.10481	0.03421	0.19137	0.29202	0.01418	0.09480	0.07929	0.12760	1.08963	0.20477	0.86054	0.40000	5.04574	2.49528	2.11062	0.62708	0.03160	0.25672	0.70221	0.29811	0.09908	0.05141	0.07786	0.19572	0.23375	0.09081	1.278190e-8	1.749215e-9
					0.13171	0.04469	0.03421	0.08274	5.391824e-3	0.20438	0.44265	0.03622	0.08355	0.09639	0.01414	1.41947	0.22787	0.82462	0.63246	4.07862	2.00876	3.12600	1.01980	0.01414	0.18961	1.08554	0.36690	0.05010	0.08147	0.07786	0.04469	0.22008	0.41464	0.09659	0.14202
					0.15717	0.03160	0.08065	0.08065	0.08759	0.17017	0.58595	0.01745	0.14125	0.07734	0.12122	1.49458	0.28622	0.66337	0.75295	3.97395	0.71162	2.39471	0.52271	0.02247	0.20973	0.85378	0.23539	0.03421	0.11076	0.04853	0.04854	0.06705	1.04671	0.09659	0.14202
					0.14721	0.04659	0.09313	0.17017	0.03661	0.41122	0.64729	0.04900	0.17546	0.06320	0.19504	1.44134	0.37127	1.87279	0.28284	3.12380	1.11706	1.00343	0.70752	0.03160	0.18393	0.77145	0.11480	0.08065	0.07968	0.05065	0.07066	0.11394	1.12708	0.09659	0.09081
					1.60585	0.03662	0.09128	0.22867	0.05010	0.22356	0.54773	0.05663	0.04896	0.08662	0.07802	1.01415	0.48283	2.47386	0.31703	2.38349	1.60000	1.56205	0.61131	0.02247	0.21198	0.58663	0.16167	0.15164	0.03160	0.03537	0.08615	0.07968	1.04143	0.09659	0.12842
					0.23870	0.04838	0.12505	0.14607	0.09128	0.42930	0.66435	0.04898	0.09639	0.12122	0.14994	0.71104	0.43047	1.93429	0.60704	1.15445	0.40000	1.12577	0.89066	0.03462	0.18747	0.26622	0.19986	0.19222	0.06542	0.01703	0.07832	0.07786	1.07703	0.08858	0.22787
					0.04108	0.03662	0.10481	0.12708	0.09570	0.72749	0.46977	0.02845	0.21198	0.10526	0.09639	0.38080	0.43526	2.01993	0.31763	1.63140	0.89443	0.75295	0.92081	0.05105	0.19729	0.08170	0.35119	0.16575	0.05602	0.02507	0.03379	0.06320	1.10899	0.08858	0.22787
					0.31700	0.03421	0.08274	0.13407	0.15800	0.91659	0.36396	0.02253	0.13442	0.12447	0.04574	0.17017	0.41134	2.59044	1.67800	2.07729	0.71706	2.61721	0.79206	0.04906	0.14363	0.13029	0.29918	0.15260	0.04469	0.04291	0.05822	0.06488	0.15442	0.08856	0.22787
					0.40455	0.02616	0.04838	0.05475	0.08274	0.63279	0.34542	0.02469	0.02247	0.07802	0.09480	0.07863	0.37960	1.81541	1.54113	2.37056	2.09203	1.60000	0.30620	0.02469	0.13660	0.15164	0.21284	0.07066	0.09993	0.04242	0.08082	0.08014	0.20000	0.13792	0.29081
					0.33481	0.08274	0.03662	0.06320	0.08259	1.22667	0.40876	0.05560	0.05835	0.07734	0.03462	0.08000	0.38319	0.74536	2.10070	3.41703	1.23205	1.20004	0.62708	0.01414	0.08376	0.18347	0.18960	0.36030	0.03483	0.02099	0.07747	0.00000	0.14202	0.22071	0.20000
					0.23520	0.07630	0.05340	0.05923	0.03421	1.28684	0.30418	0.03610	0.12235	0.09993	0.25477	0.08252	0.31639	0.43311	1.96929	3.60040	1.56357	2.10693	0.88682	1.180800e-17	0.02616	0.28738	0.12388	0.32229	0.03585	0.06695	0.06603	0.07786	0.21965	0.89343	0.28284
					1.73664	0.03661	0.03160	0.01850	0.03662	1.07181	0.21273	0.04574	0.09159	0.12122	0.18132	0.03610	0.31122	0.44721	2.03485	2.52982	1.99965	2.10367	0.14347	0.01414	0.05010	0.26622	0.12505	0.28280	1.229034e-16	0.08913	0.06321	0.04853	0.10919	1.00926	0.09081
					0.37519	0.03421	0.03662	0.01310	0.07741	1.06286	0.15124	0.01746	0.03610	0.10674	0.14994	0.02247	0.31780	0.65372	0.62705	2.41905	1.51193	1.67239	0.44721	0.03160	0.08759	0.12514	0.17210	0.31404	0.02396	0.07480	0.07797	0.01466	0.42446	1.03183	0.09081
					0.12638	0.06320	0.12973	0.05923	0.04470	1.25636	0.13170	0.04469	0.08938	0.08264	0.09993	0.03160	0.22103	0.20000	1.21683	2.61008	0.68795	0.33333	1.00000	0.04574	0.00000	0.06585	0.12708	0.37307	0.06705	0.09619	0.04630	0.03585	0.30919	0.93987	0.10919
					0.24312	0.04838	0.04838	0.27331	0.03421	0.79602	0.39392	0.07863	0.10526	0.14132	0.08938	0.09639	0.12882	0.11729	1.77266	1.47804	0.60653	2.42985	0.72111	0.03462	0.02267	0.28264	0.12708	0.04482	0.04469	0.04355	0.06661	1.184053e-16	0.10919	0.84545	0.10919
					1.13574	0.03421	0.03421	0.29446	0.07851	0.51425	0.29811	0.06320	0.16113	0.18960	0.14780	0.13559	0.17783	0.37487	1.51030	6.84324	0.90907	1.43545	1.01980	0.03462	0.13407	0.54367	0.24005	0.03192	0.04926	0.02236	0.01463	0.05602	0.96033	0.32174	0.09081
					0.25840	0.02267	0.03160	0.27331	0.06320	0.41181	0.35240	0.07734	0.17017	0.19013	0.20618	0.14132	0.12447	0.34649	1.21697	4.11225	0.75295	1.40000	0.73923	0.08986	0.01310	0.55734	0.21404	0.07630	0.06543	0.06543	0.02392	0.03483	1.63070	0.36240	0.21965
					0.20999	0.04469	0.02267	0.31738	0.01310	0.48132	0.01927	0.07929	0.09988	0.19040	0.05835	0.07802	0.24066	0.37487	1.38073	2.85044	1.27900	1.32154	0.55440	0.02247	9.647838e-17	0.58188	0.22787	0.15909	0.06320	0.02396	0.06987	0.03585	1.69996	0.32339	0.21965
					0.22851	0.03662	0.07066	0.29918	0.05010	0.25280	0.10722	0.09993	0.13442	0.23599	0.27432	0.17017	0.34924	0.56569	0.80000	1.00000	2.45671	1.43545	0.63246	0.04896	0.04659	0.28152	0.24612	0.09563	0.03483	0.01694	0.06324	0.02240	1.78469	0.10833	0.12842
					0.21161	0.06320	0.01850	0.07066	0.03421	0.01310	0.13407	0.08066	0.09639	0.24066	0.24657	0.33535	0.41366	0.28284	0.08294	0.72111	0.51033	0.73923	0.20000	0.07066	0.06585	0.31600	0.16113	0.07798	0.07832	0.01694	0.03123	0.05602	1.72225	0.09729	0.12842
					0.32869	0.05340	0.01310	0.09658	0.02616	0.09480	0.09583	0.05207	0.21867	0.30585	0.14132	0.49741	0.41473	0.11706	0.20000	2.45128	0.43311	0.30620	0.23174	0.08938	0.03160	0.46105	0.11680	0.17525	0.06865	0.04626	0.01701	0.04626	0.92973	0.10757	1.546577e-8
					0.35584	0.03662	0.03160	0.09659	0.03421	0.13597	0.06454	0.05207	0.13555	0.25438	0.14132	0.61615	0.51670	1.26800	0.40000	2.47546	0.11729	0.08294	0.31706	0.08189	0.09313	0.27098	0.06320	0.08377	0.03483	0.06320	0.01699	0.04854	0.12857	0.14623	0.09081
					0.39294	0.01927	0.04469	0.06453	0.06320	0.08759	0.06320	0.03610	0.05105	0.27358	0.08355	0.75790	0.33778	1.89428	0.41678	1.20004	0.72111	0.11706	0.14347	0.09993	0.09993	0.34767	0.03421	0.03661	0.07923	0.01694	0.03684	0.05071	0.20012	0.14623	0.21965
					1.46873	0.03662	0.06863	0.16377	0.03662	0.08968	1.660085e-16	0.04469	0.11662	0.08189	0.09639	0.68322	0.27084	2.34136	0.61131	1.52315	1.11051	0.31706	0.58941	0.11948	0.10722	0.42396	0.08259	0.09481	0.07066	7.442238e-18	0.01694	0.05071	0.19833	0.10833	0.27456
					0.26848	0.01310	0.11104	0.09994	0.06454	0.14765	0.06320	0.05835	0.03462	0.28111	0.02469	0.48706	0.23545	1.59972	0.52367	1.67130	0.20000	1.52157	0.33798	0.12447	0.09480	0.60281	0.06454	0.14765	0.03585	0.03483	0.04514	0.04853	0.30719	0.14605	0.36608
					0.37177	0.01310	0.12505	0.10484	0.05010	0.15800	0.06585	0.06557	0.12760	0.23746	0.00000	0.28029	0.15407	2.60864	0.66337	0.52367	0.41678	1.60428	0.40000	0.05835	0.05923	0.25701	0.15800	0.07851	1.842465e-16	0.02240	0.07969	0.05792	0.40856	0.10757	0.54651
					0.34872	0.05010	0.07741	0.14773	0.03421	0.16619	0.07742	0.03462	0.22345	0.09993	8.364450e-24	0.17592	0.09272	2.49235	0.48995	0.77086	1.00343	1.12840	0.08294	0.07802	7.844808e-17	0.17930	0.12775	0.05178	1.799610e-16	0.02073	0.07787	0.02396	0.52080	0.10757	0.50000
					0.85362	0.03160	0.07630	0.13217	0.04838	0.20229	0.22378	0.05835	0.12122	0.20477	0.01746	0.05560	0.01414	2.09439	0.80429	1.63946	0.71162	0.80852	0.20000	0.09585	0.03160	0.17315	0.08759	0.01850	0.04626	0.03160	0.07066	0.03585	0.54562	0.10757	0.36824
					0.38471	0.04469	0.14823	0.03662	0.01850	0.26999	0.27487	0.03462	0.10247	0.09988	0.02469	0.04906	0.13407	1.59972	1.41631	0.83644	0.44721	0.88682	0.84856	0.01414	0.05010	0.06454	0.13029	0.04470	0.02240	0.01466	0.05791	0.03585	0.56547	0.00000	0.31063
					0.31061	0.03160	0.03662	0.04466	0.01310	0.24348	0.26622	0.01414	0.09440	0.09585	7.844818e-18	0.06476	0.05105	2.26317	1.53594	0.84853	0.60653	0.60571	1.30929	0.04906	0.06454	0.65050	0.15164	0.10804	0.06542	0.04626	0.01756	0.03160	0.49446	9.053699e-10	0.14202
					0.33414	0.07851	0.02267	0.08759	0.05475	0.33765	0.29356	0.01414	0.09272	0.04788	0.02469	0.27832	0.11394	0.95255	1.80380	1.13743	0.23174	0.75713	2.03939	0.04469	0.36746	0.84710	0.23689	0.05806	0.04853	0.01484	0.07991	0.02240	0.42442	9.053699e-10	0.20000
					0.25477	0.14132	0.01850	0.04838	0.05182	0.25477	0.26999	0.02247	0.15800	0.04788	0.01746	0.27467	0.12640	0.20000	2.43311	1.42387	0.48995	0.23911	2.75293	0.02000	0.21233	0.42396	0.12708	0.02616	0.06705	0.04853	0.05602	0.02073	0.22125	9.053699e-10	0.28284
					0.45792	0.07742	0.03160	0.03421	9.410135e-3	0.20491	0.05010	0.05835	0.07802	0.22221	0.02247	0.51842	0.10526	0.21651	1.81108	1.73966	0.44721	0.74536	3.96989	0.01746	0.34767	0.39971	0.16235	0.05923	0.07066	0.03585	0.03416	0.03483	0.19941	0.09243	0.31063
					0.35321	0.10481	0.02267	0.04469	0.01927	0.09659	0.05178	0.02000	0.15410	0.25280	0.00000	0.73394	0.09639	0.11706	1.41421	1.49928	0.52271	0.43311	3.62525	0.05835	0.37093	0.34163	0.10481	0.17315	0.05141	0.02240	0.06905	9.209300e-17	0.10860	0.10833	0.22787
					0.43481	0.07066	2.353442e-17	0.04470	0.02616	0.03160	0.05178	0.03610	0.08355	0.28328	0.02247	0.70247	0.08189	0.21651	1.55769	1.86393	0.49001	0.43311	3.96326	0.09480	0.03160	0.15854	0.13407	0.23005	0.05071	0.05792	0.10387	9.121592e-17	0.22761	0.10833	0.32225
					1.36320	0.01310	0.03160	0.01310	0.08065	0.03421	0.21438	0.01414	0.06476	0.26437	0.02247	0.82555	0.02000	0.14347	1.54756	2.06695	0.51042	0.74732	3.73606	0.20653	0.29134	0.17685	0.27269	0.23539	0.05792	0.04853	0.18242	0.01694	0.22759	0.20041	0.30466
					0.28595	0.08065	0.03160	0.01417	0.07741	0.01310	0.11762	0.04469	0.14132	0.21649	0.03462	0.58380	0.10674	0.32773	1.05409	1.80380	0.34649	5.73583	3.63439	0.07863	0.19222	0.14490	0.14823	0.14363	0.06865	0.09175	0.11245	0.01466	0.22767	0.10833	0.22787
					0.09270	0.01310	0.03662	0.04469	0.04659	0.06454	0.21438	0.03610	0.14491	0.08938	0.08662	0.22120	0.19876	0.16555	1.10561	1.13483	0.11706	4.85161	3.05287	0.04788	0.19228	0.07066	0.29811	0.13029	0.03483	0.02396	0.12094	0.01694	0.21966	0.28345	0.14202
					0.18987	0.01853	0.04469	0.08968	0.09659	0.05475	0.22345	0.03610	0.06800	0.04788	0.03767	0.16905	0.24752	0.29484	1.25063	2.66833	0.40000	4.17612	3.65221	0.03767	0.07851	0.17161	0.27183	0.03160	0.04469	0.03160	0.12640	0.02073	0.22786	0.13546	0.30466
					0.44775	0.02267	0.03421	0.05923	0.06320	0.09480	0.26877	0.01414	0.13088	0.08355	0.01414	0.30586	0.29811	0.42495	1.40281	4.09629	0.21651	2.90032	3.88330	0.08189	0.17546	0.32991	0.15315	0.09583	0.02073	0.04469	0.08147	0.02073	0.21968	0.21609	0.21965
					0.27671	0.02267	0.02267	0.05340	0.11480	0.13029	0.16619	0.01414	0.13088	0.22034	0.15800	0.20234	0.19382	0.28284	1.27302	4.21900	0.20000	2.41661	4.10508	0.20234	0.17110	0.07066	0.07066	0.08759	0.04855	0.03585	0.11270	0.01466	0.09081	0.28284	0.20000
					0.43907	0.02267	0.03662	0.06454	0.12169	0.15854	0.30370	0.01746	0.01777	0.12447	0.13029	0.25477	0.11816	0.56569	0.86453	4.28999	0.16555	1.09590	4.19303	0.11948	0.19222	0.08938	0.27193	0.15908	0.06320	0.01466	0.07969	0.00000	0.10921	0.21609	0.09081
					0.37805	0.01853	0.02616	0.01850	0.18066	0.14823	0.26813	0.03610	0.04574	0.12640	0.10674	0.12760	0.09993	0.21651	1.13137	4.93964	0.40851	3.38664	2.77849	0.15800	0.35330	0.12775	0.05010	0.09480	0.04853	0.02073	0.04853	0.01694	0.09070	0.19251	0.09081
					0.58562	0.01310	0.03421	0.01850	0.17746	0.30942	0.27098	0.09993	0.03610	0.13555	0.26881	0.11816	0.14491	0.48294	0.73124	4.18837	0.55972	3.23110	1.98703	0.17502	0.15585	0.03421	0.03160	0.11244	0.04856	0.01694	0.05602	0.01694	0.10918	0.22606	1.546577e-8
					0.25606	0.06714	0.02616	0.04659	0.25477	0.24814	0.28230	0.11225	0.05105	0.11344	0.20234	0.09480	0.08938	0.40851	1.00343	3.27936	0.41678	2.29081	0.95972	0.18872	0.17161	0.28789	0.04470	0.09480	0.05142	0.02240	0.01466	0.00000	0.20001	0.09237	1.473312e-8
					0.68479	0.10329	1.534883e-17	0.06320	0.31122	0.14304	0.26622	0.08547	0.06707	0.12595	0.09993	0.09004	0.11175	0.84853	1.63946	2.32568	0.40000	3.82099	0.28294	0.18132	0.15101	0.06585	0.02267	0.14823	0.09628	0.05792	1.315614e-17	0.01466	0.28283	0.22407	0.10919
					1.35860	0.07085	1.754152e-17	0.11897	0.24960	0.29334	0.14363	0.09912	0.05207	0.35351	0.05835	0.15804	0.13361	0.90139	1.44222	2.75699	0.48995	2.67235	0.79206	0.08000	0.26622	0.12708	0.15908	0.06714	0.05073	0.05602	0.03160	0.00000	0.40000	0.10855	0.10919
					0.35471	0.08494	1.180800e-17	0.13968	0.21077	0.25477	0.09908	0.10236	0.02000	0.17602	0.11344	0.13562	0.15800	1.17920	1.93203	1.84253	0.21651	2.28035	0.11706	0.11344	0.25477	0.23539	0.04469	0.08759	0.10849	0.05602	0.01466	0.02396	0.32228	0.20000	0.10919
					0.13081	0.08494	0.01853	0.11554	0.20234	0.08259	0.09908	0.02909	0.06320	0.19311	0.08000	0.24657	0.27006	0.27592	1.31377	2.94993	0.14347	0.51706	0.23174	0.07066	0.67593	0.07741	0.05178	0.34634	0.14229	0.03483	0.07786	0.03160	0.32226	0.31842	0.10919
					0.17624	0.01927	0.01850	0.14132	0.15808	0.29134	0.09583		0.03610	0.18218	0.17502	0.26927	0.12595	0.28968	0.97033	10.62480	0.40851	0.67862	0.23174	0.03462	0.60593	0.05475	0.05010	0.44090	0.07959	0.04469	0.05071	1.241147e-17	0.12836	0.10855	0.10919
					0.46380	0.01417	0.01850	0.11179	0.03160	0.26058	0.05178		0.02247	0.04917	0.22034	0.14834	0.08189	0.37487	1.72047	7.66953	0.28294	1.00638	0.10367	0.06476	0.53912	0.02267	0.06585	0.45694	0.01694	0.01466	0.03483	0.01694	0.21959	0.09619	0.09081
					0.39132	0.05340	0.01850	0.11394	0.06585	0.18066	0.05178		0.02247	0.10938	0.34181	0.17493	0.06557	0.11706	2.12603	6.11882	0.69290	0.80000	0.27592	0.07734	0.34903	0.07741	0.05340	0.49964	0.16705	0.04854	0.11393	0.01694	0.38156	0.09237	0.20000
					0.29041	0.04838	0.01850	0.07742	0.03421	0.31627	0.08065		0.04469	0.11213	0.31600	0.12716	0.10894	0.20000	1.84391	3.08294	0.41678	1.09590	1.98577	0.06937	0.39379	0.12388	0.08759	0.51216	0.04450	0.05056	0.10650	1.176721e-17	0.44721	0.13440	0.10919
					0.39342	0.04469	0.01850	0.12708	0.15050	0.27856	0.15331		0.01746	0.09585	0.22472	0.06476	0.11175	0.20000	2.84253	1.92063	0.21652	0.41678	1.84253	0.10674	0.03160	0.38051	0.20234	0.12169	5.250423e-6	0.05743	0.09630	0.02240	0.12842	0.10770	0.21965
					0.50431	0.03662	0.03662	0.18747	0.06322	0.50659	0.12505		0.02469	0.12640	0.18338	0.04788	0.14132	1.40489	2.53810	1.57050	0.93498	0.08294	0.90907	0.11394	0.20313	0.13950	0.28502	0.13026	0.04465	0.07056	0.05792	0.03585	0.28284	1.846752e-9	0.21965
					0.28242	0.03662	0.01850	0.52317	0.08759	0.25776	0.03421		0.01414	0.10894	0.17502	0.10674	0.27006	1.20286	2.29124	1.93757	0.63246	1.38073	0.08294	0.08000	0.25903	0.11330	0.25288	0.08256	0.15640	0.07015	0.03586	0.03585	0.36824	0.19912	0.20000
					0.69366	0.03160	7.232556e-18	0.63837	0.12973	0.22964	0.04659		0.01746	0.11344	0.06557	0.03462	0.42919	1.32154	1.44222	2.32597	0.11729	3.25576	0.21651	0.19222	0.25701	0.11554	0.25411	0.15800	0.03174	0.03160	0.07971	0.03235	0.29081	0.10770	0.14202
					1.64265	0.04470	0.01850	0.61671	0.08065	0.10790	0.05010		0.03462	0.17632	0.07066	0.03610	0.68282	1.52315	3.07992	2.92222	1.00000	2.93889	0.90531	0.15410	0.31462	0.20851	0.19138	0.17017	0.06547	0.01463	0.03483	0.03252	0.36824	0.09959	0.28284
					0.06432	0.03421	0.01850	0.60784	0.20034	0.25701	0.16974		0.05835	0.22345	0.06320	0.08986	0.88595	1.45602	3.75936	1.04513	2.36686	3.96153	2.14616	0.13555	0.24741	0.20438	0.13412	0.29197	0.22476	0.02223	0.07832	0.03646	0.09081	1.944272e-10	0.15442
					0.03126	0.01310	0.01310	0.45037	0.19133	0.29750	0.09993		0.05105	0.29086	0.17546	0.24040	1.26644	0.32773	3.92938	0.81715	2.51495	4.82919	2.54865	0.33244	0.10647	0.22345	0.27800	0.31677	0.14688	1.550260e-3	0.04626	0.02343	0.15442	0.14505	0.22787
					0.21576	0.01310	0.02267	0.13407	0.08259	0.17017	0.06454		0.03610	0.24657	0.11816	0.46010	1.34254	0.92081	3.42345	1.00683	3.22490	5.16140	4.54151	0.31600	0.06714	0.29134	0.22065	0.33190	0.05620	0.01518	0.04626	0.02169	0.22787	0.09959	0.22787
					0.46634	0.03421	0.01310	0.01310	0.03421	0.12169	0.13407		0.04574	0.32534	0.09480	0.66435	1.42106	2.42085	3.02655	1.40245	3.94672	5.79833	5.33949	0.29888	0.20645	0.29134	0.25760	0.13029	0.23644	8.747517e-4	0.09483	0.02097	0.10919	0.09959	0.32791
					0.48601	0.08844	1.096345e-17	0.01850	0.05475	0.10481	0.09993		0.04574	0.08355	0.11314	0.78529	1.47257	2.81789	2.00000	1.76304	4.09629	4.88554	6.60583	0.29134	0.19449	0.13660	0.20152	0.32639	0.30276	0.03741	0.09593	0.01764	2.623813e-9	0.13728	0.14202
					0.33891	0.05340	0.01850	0.05923	0.03160	0.29590	0.11394		0.02247	0.11226	0.06651	0.92419	1.46827	4.13645	1.35367	3.20107	3.31827	4.66208	7.01267	0.21793	0.14304	0.16974	0.20750	0.25775	0.23535	0.01707	0.08615	0.03427	0.10919	0.09230	0.29081
					0.34838	0.04838	0.01853	0.01850	0.04838	0.19986	0.07066		0.04896	0.05560	0.09993	1.00647	1.25806	4.35856	1.13823	2.70882	2.43311	3.69991	7.24707	0.17502	0.21048	0.24177	0.03159	0.04838	0.34696	0.02210	0.12414	0.04352	0.15442	0.13728	0.29081
					0.52234	0.05475	3.069767e-17	1.475158e-16	0.02267	0.14072	0.14830		0.03610	0.06320	0.02000	0.84013	1.14852	4.69148	0.38623	2.45128	2.60132	2.71177	4.33704	0.19175	0.21233	0.28470	0.04469	0.07742	0.39732	0.03483	0.16422	0.02158	0.20000	0.09230	0.22787
					0.33832	0.03661	0.01310	0.01850	0.07741	0.11405	0.12514		0.06320	0.07863	0.06238	0.74426	1.05470	2.86356	0.50017	2.08806	2.01991	2.21398	3.83056	0.08355	0.22087	0.24680	0.05009	0.12708	0.14678	0.03483	0.17555	0.02277	0.09081	0.10440	0.40000
						0.03421	2.982381e-17	0.03421	0.05178	0.09583	0.11244		0.06476	0.06937	0.12760	0.71322	0.96483	3.27354	0.20019	2.46735	1.88476	2.88886	3.88808	0.04788	0.01417	0.31835	0.07715	0.08065	0.05602	0.05071	0.17349	0.05780	0.10919	0.10855	0.44721
						0.08274	3.577783e-17	0.06714	0.05010	0.08376	0.07742		0.04906	0.03462	0.10938	0.40503	1.07626	2.60864	0.20003	1.49243	0.16555	3.54338	4.51221	0.03610	0.01850	0.22087	0.06322	0.08259	0.11333	0.08615	0.19986	5.845579e-4	0.10919	0.01782	0.29081
						0.16113	0.01853	0.04659	0.16575	0.03160	0.04467		0.01414	0.02247	0.24773	0.17228	1.25806	2.73231	0.34647	1.94311	0.30620	2.37366	2.92894	0.06320	0.15050	0.09659	0.01853	0.30614	0.13029	0.06488	0.07094	0.06800	0.21965	0.10855	0.25000
						0.16113	0.01310	0.07742	0.27331	0.01310	0.06320		0.01414	0.06320	0.21867	0.20618	1.46959	1.71507	0.21657	2.10693	0.44721	2.65313	4.14940	0.09585	0.18825	0.30852	0.03662	0.17787	0.30299	0.02240	0.07954	0.21408	0.20000	0.23013	0.21404
						0.14549	0.02267	0.08259	0.19986	0.01850	0.12180		0.04906	0.06320	0.18649	0.23599	1.69169	2.40143	0.40851	2.03961	0.08294	2.34136	4.24264	0.04896	0.26567	0.35707	0.02267	0.15800	0.13540	0.02240	0.17200	0.26897	0.41463	0.15358	0.84261
						0.15315	0.00000	0.08759	0.24612	0.05340	0.21077		0.08000	0.03610	0.14728	0.12251	1.90542	2.37057	0.19943	1.72982	0.44721	2.11845	4.37621	0.07734	0.08170	0.30852	0.05475	0.15800	0.15788	0.02240	0.19419	0.23602	0.28284	0.14090	0.63196
						0.07742	0.00000	0.07741	0.11394	0.21748	0.21048		0.14125	0.10526	0.08355	0.50560	2.00018	2.14384	0.20001	1.21655	1.24118	2.49528	2.81426	0.07066	0.55277	0.33909	0.03421	0.15050	0.06865	0.03483	0.21258	0.25641	0.28284	0.22433	0.56569
						0.01310	0.00000	0.07066	0.06454	0.19222	0.13598		0.11360	0.07066	0.04788	0.57449	1.57668	2.37312	0.29482	1.06751	0.96932	2.60768	3.51706	0.05835	0.62963	0.29072	0.07085	0.05475	0.07066	0.04469	0.10933	0.26032	0.10919	0.14090	0.41464
						0.01310	0.00000	0.09993	0.26567	0.30414	0.19050		0.11360	0.04574	0.03160	0.45421	1.14619	3.68402	0.08291	1.49961	1.11803	2.83927	3.20624	0.04788	0.47071	0.03160	1.409475e-16	0.15800	0.26813	0.04469	0.10080	0.06487	0.11073	0.10698	0.22787
						0.02267	0.01310	0.07066	0.18747	0.27193	0.18960		0.11394	0.09272	0.08000	0.61110	0.75918	3.57946	0.44721	2.12146	0.74536	1.74359	2.93424	0.01746	0.41296	0.03160	0.03662	0.17017	0.26004	0.04469	0.11073	0.04853	0.11073	0.20000	0.10919
						0.03160	0.00000	0.04838	0.26406	0.34309	0.22159		0.10526	0.15410	0.27792	0.64166	0.51475	3.78546	0.53014	2.67235	2.73185	2.05748	2.71259	0.03160	0.44179	0.08274	0.05474	0.12169	0.59299	0.05602	0.16871	0.01694	1.997286e-5	0.20000	0.31063
						0.05475	0.00000	0.06322	0.22164	0.13407	0.01850		0.09480	0.09639	0.27082	0.49573	0.31574	3.90349	0.40000	3.57677	3.08367	2.40832	3.84708	0.08938	0.10017	0.06454	0.36666	0.30758	0.30238	0.03585	0.19572	0.03483	0.10919	0.20000	0.14202
						0.07066	0.00000	0.27269	0.17685	0.11394	0.07085		0.09993	0.17812	0.33614	0.60615	0.22241	2.64447	0.29482	3.68873	2.67197	3.82099	2.73231	0.02247	0.07057	0.05475	0.55081	0.24863	0.29811	0.03160	0.24259	0.01466	0.40000	0.20000	0.14202
						0.08759	0.00000	0.32859	0.07742	0.07851	0.02267		0.10526	0.28622	0.33330	0.85443	0.31929	3.71706	0.33800	3.63589	1.64924	3.41175	0.72111	0.14693	0.09908	0.04659	0.51294	0.22097	0.06320	0.02240	0.22414	0.10650	0.41464	0.13444	0.10919
						0.10790	0.01850	0.42313	0.14363	0.18426	0.03421		0.12447	0.26386	0.22345	0.96108	0.17528	3.32309	0.23174	1.37313	0.28294	4.23792	0.48995	0.11394	0.08065	0.24066	0.49284	0.07603	0.11270	0.09630	0.42891	0.07969	0.31063	0.09562	1.749195e-9
						0.12775	0.00000	0.49339	0.11394	0.26590	0.04469		0.11406	0.24680	0.13559	0.90722	0.21075	0.23174	0.40000	1.76777	0.40851	3.56897	1.21095	0.20604	0.13968	0.18240	0.49284	0.09480	0.16422	0.10948	0.31925	0.07969	0.50557	0.09562	0.50281
						0.09659	0.00000	0.31122	0.16376	0.20515	0.02267		0.18426	0.24752	0.21867	0.65983	0.19638	2.40832	0.28284	1.78669	0.60000	2.83927	2.04678	0.08000	0.07066	0.11244	0.30028	0.16484	0.06543	0.03483	0.33823	0.10650	0.56569	0.22842	0.15442
						0.07066	0.01310	0.21748	0.26058	0.22345	0.03160		0.16204	0.11394	0.24040	0.63774	0.19950	1.19146	0.48995	1.57295	0.67862	1.98337	1.93203	0.03462	0.17650	0.10329	0.05178	0.08899	0.06488	0.07969	0.12267	0.10206	0.36824	0.22842	0.10919
						0.07066	0.01853	0.29978	0.25796	0.24612	0.05475		0.12595	0.07066	0.26058	0.50464	0.06476	0.88682	0.33798	1.49961	0.40000	0.85660	1.00343	0.13823	0.23539	0.05340	0.03160	0.16451	0.20758	0.05602	0.03160	0.03160	0.50557	0.14867	0.31063
						0.07851	0.03421	0.24487	0.29442	0.25477	0.03421		0.38302	0.12122	0.19192	0.20234	0.19203	1.56205	0.29484	1.44461	0.21651	0.99024	1.45602	0.17017	0.23580	0.20234	0.04469	0.14547	0.25011	0.03160	0.09175	0.02240	0.28284	0.14867	0.22787
						0.19611	0.01310	0.12640	0.24612	0.19480	0.07741		0.29158	0.17876	0.19986	0.10526	0.09310	2.37405	0.28294	0.66337	0.20000	1.05186	0.10367	0.15800	0.26058	0.21077	0.04470	0.07165	0.08014	0.02073	0.07789	0.01694	0.21965	0.14867	0.35355
						0.11394	0.01310	0.25324	0.15315	0.11179	0.05178		0.22223	0.15863	0.11406	0.28622	0.10457	3.45254	0.60000	0.34649	0.40000	1.00638	0.00000	0.11360	0.24177	0.11244	0.12505	0.22377	0.07969	0.01466	0.03386	0.01694	0.21965	7.039879e-9	0.37978
						0.18426	0.00000	0.16575	0.23643	0.16619	0.03160		0.22223	0.12235	0.09159	0.12235	0.11314	1.20000	0.51042	0.34649	0.31706	2.26317	1.56436	0.03610	0.12973	0.08759	0.14773	0.17965	0.25337	0.00000	0.02073	0.00000	0.10919	0.09009	0.00000
						0.13407	0.01310	0.05340	0.12708	0.12708	0.07066		0.17783	0.20234	0.06707	0.10986	0.07863	0.52271	0.48294	0.70752	0.20000	2.76989	1.31133	0.08355	0.17829	0.08259	0.07851	0.01868	0.33889	0.02073	0.09886	0.01694	0.22787	0.13435	0.17752
						0.10722	0.01310	0.08844	0.64729	0.07085	0.08065		0.08000	0.11344	0.09585	0.43418	0.17017	2.60768	0.37487	0.77086	0.20000	2.91055	1.00050	0.30455	0.03662	0.17110	0.13029	0.19247	0.40749	0.01466	0.01466	0.02240	0.10919	0.21907	0.09081
						0.08844	0.02267	0.07066	0.38449	0.19587	0.07085		0.02469	0.15407	0.13029	0.78174	0.37234	0.96932	0.34649	0.44721	0.65372	3.38593	0.55440	0.16492	0.03662	0.15164	0.02267	0.04622	0.21198	0.02240	0.00000	0.03160	0.14202	0.21907	0.36824
						0.08759	0.01850	0.06322	0.38573	0.05010	0.04503		0.01746	0.17303	0.13442	1.24764	0.15643	2.86356	0.99999	0.52271	1.00000	3.54140	0.20000	0.15800	0.03160	0.09313	0.02267	0.04622	0.18601	0.03160	0.03160	0.03585	2.899249e-8	0.21907	0.44721
						0.05475	0.01850	0.04659	0.59129	0.02267	0.09313		0.02247	0.14728	0.28328	1.60245	0.19222	5.05744	0.67862	0.34649	0.42495	3.67151	0.84853	0.15095	0.17546	0.13407	0.12775	0.08423	0.13407	0.03585	0.05071	0.01466	4.980709e-9	0.14300	0.28284
						0.05178	0.01850	0.06320	0.43068	0.02267	0.11179		0.03610	0.12251	0.48201	1.69160	0.20234	3.86264	0.21649	0.00000	0.48995	4.67145	1.28062	0.03462	0.21484	0.17315	0.06454	0.23597	0.10650	0.01484	0.02240	0.01466	0.10919	0.10456	0.44721
						0.03662	0.03699	0.01853	0.46808	0.01850	0.14012		0.05560	0.01414	0.50432	1.33321	0.07734	5.69210	0.17935	0.23174	0.44721	5.66392	1.54099	0.04574	0.20332	0.37817	0.05340	0.19789	0.05110	0.01694	0.05792	2.192690e-18	1.193981e-8	1.100895e-9	0.42446
						0.31224	0.04469	0.03160	0.27487	0.03662	0.14765		0.04788	0.01414	0.45244	1.09038	0.19986	3.56830	0.36082	0.53015	0.48995	4.70142	1.52315	0.12719	0.22167	0.51903	0.07066	0.03421	0.04854	0.05141	0.03585	0.01466	0.09081	0.14079	0.21965
						0.33475	0.05178	1.008638e-16	0.41563	0.03160	0.11330		0.03160	0.14054	0.42981	0.82509	0.07802	2.30489	0.19510	1.00000	0.40851	4.33962	1.29353	0.15800	0.21273	0.69700	0.06585	0.24814	0.14678	0.05141	0.05141	0.03160	0.20000	1.100895e-9	0.20000
						0.13029	0.06585	0.02616	0.39736	0.07066	0.03421		0.01414	0.11226	0.35646	0.53069	0.04574	0.57748	0.50017	1.01980	0.92081	2.60768	1.23093	0.37960	0.05781	0.90339	0.08376	0.15315	0.04469	0.03586	0.04854	1.227907e-17	0.20000	0.10681	0.14202
						0.13029	0.08480	0.01310	0.28878	0.04469	0.03160		0.02247	0.44353	0.22472	0.56262	0.15800	1.52844	0.28284	0.84853	1.44729	2.88021	0.84856	0.44274	0.03421	0.86775	0.15229	0.10722	0.08938	0.04626	0.01466	1.315615e-17	0.10919	0.14079	0.69081
						0.13407	0.06863	0.06322	0.15646	0.06714	0.48339		0.07929	0.26437	0.31929	0.76978	0.22481	1.16872	0.35367	0.89443	1.48360	1.84391	0.49692	0.33495	0.04469	0.72692	0.07741	0.17746	0.03515	0.05071	0.08147	1.534883e-17	0.10919	0.14079	0.12842
						0.19729	0.08938	2.280398e-17	0.09993	0.06585	0.48010		0.09639	0.06469	0.19192	0.54731	0.14728	3.00115	0.33333	0.80000	1.56205	2.33238	0.31706	0.31244	0.02267	0.69950	0.17876	0.22567	0.05071	0.03483	0.06488	0.01466	0.14202	2.074507e-8	0.21965
						0.27313	0.14132	0.04469	0.17400	0.05475	0.32324		0.13442	0.07863	0.13407	0.40166	0.11948	1.81700	0.66689	0.72656	1.92215	3.44093	1.21655	0.23611	0.02616	0.63839	0.33392	0.08759	0.02396	0.03151	0.08147	1.754155e-18	0.29081	0.22825	0.20000
						0.09659	0.14304	0.05475	0.34181	0.07742	0.79063		0.15800	0.07929	0.11662	0.29621	0.20029	3.77359	0.50017	0.89443	1.16619	3.54196	1.31706	0.19192	0.07066	0.44912	0.36030	0.08065	0.02396	0.03295	0.07066	0.00000	5.081291e-9	0.20007	0.14202
						0.04659	0.12512	0.05474	0.70582	0.05475	0.87398		0.13555	0.33330	0.04906	0.71856	0.12424	1.45339	0.40013	0.11706	0.83644	2.33219	1.80380	0.28075	0.05475	0.54950	0.31758	0.09993	0.06543	0.04317	0.05071	0.16312	0.20000	0.11006	0.20000
						0.05474	0.14132	0.02267	0.99916	0.07066	0.39087		0.08938	0.20449	0.14054	1.25871	0.16131	3.21248	0.28284	0.63246	0.77021	1.67362	1.51706	0.24580	0.04469	0.46925	0.37151	0.09480	0.16113	0.06307	0.03160	0.15666	0.22787	0.20016	0.22787
						0.07066	0.14012	0.07085	1.28176	0.05340	0.60123		0.08986	0.06476	0.04469	1.92780	0.33060	3.72244	0.51042	1.13483	1.34124	1.61245	1.60215	0.31122	0.03421	0.30454	0.69592	0.21284	0.21198	2.021743e-3	0.05602	0.19148	4.640086e-8	0.20016	0.21965
						0.02267	0.13968	0.14132	1.52707	0.14072	0.41101		0.06320	0.15199	0.03610	3.06298	0.36312	4.90676	0.08294	1.31377	1.22402	1.32225	0.66337	0.19222	0.01310	0.20687	0.79063	0.04838	0.19986	0.02248	0.05602	0.18940	1.205765e-8	0.20038	0.29081
						0.06454	0.15808	0.10722	1.60155	0.15908	0.13950		0.01746	0.33376	0.03160	3.64278	0.29139	3.96449	0.11706	0.61131	2.18455	0.67862	0.40000	0.18426	0.11394	0.22159	0.82181	0.08759	0.18386	0.01694	0.03483	0.21198	0.22787	0.21952	0.22787
						0.09993	0.22674	0.11554	1.74679	0.13029	0.60523		0.02000	0.37316	0.43964	3.05112	0.24221	4.71779	0.28284	1.00343	2.23180	0.89443	0.28284	0.39474	0.11394	0.16113	0.73138	0.09313	0.24954	0.03160	0.03483	0.03585	0.10919	0.21952	0.20000
						0.11406	0.25280	0.08844	1.69878	0.10722	0.69545		0.16204	0.41563	0.60372	2.76081	0.14734	4.27802	0.41678	0.92716	2.97574	0.34649	0.44721	0.19584	0.09908	0.11405	0.85710	0.03662	0.39972	0.03160	0.05071	0.06705	0.22787	0.14323	0.09081
						0.09313	0.09480	0.10791	1.51954	0.13216	0.86806		0.22345	0.41104	0.42402	1.84304	0.05837	0.95255	0.37487	1.66370	3.00000	0.51042	0.40000	0.05560	0.01850	0.26999	0.66660	0.06585	0.02073	0.06320	0.02240	0.04854	0.22787	0.22865	0.20000
						0.09908	0.14132	0.08938	1.10280	0.32658	0.72238		0.12447	0.39461	0.45700	0.84611	0.08066	2.67235	0.48995	2.00000	7.78575	0.96932	0.69290	0.06320	0.02616	0.26567	0.44465	0.16113	0.04926	0.04626	0.02073	0.06865	0.32791	0.20004	0.35294
						0.11762	0.17210	0.03160	0.90361	0.07066	0.70321		0.11406	0.24040	0.36915	0.08072	0.12235	0.82462	0.31706	2.40428	3.47355	0.75295	0.65372	0.06476	0.03421	0.33512	0.48314	0.06454	0.03585	0.09370	0.01709	0.02073	0.20000	0.10727	0.54706
						0.27058	0.12180	0.03661	0.69464	0.13029	0.42313		0.13555	0.21332	0.09993	0.07220	0.13358	0.89443	0.11706	2.56125	4.93390	1.13137	0.28294	0.23599	0.03421	0.50560	0.66435	0.03662	0.05602	0.05071	0.02240	0.02073	0.09081	0.13999	0.46030
						0.15050	0.15800	0.03421	0.55359	0.03160	0.29811		0.04574	0.09480	0.03160	0.14054	0.12641	0.40000	0.20000	1.93757	4.84149	0.77086	0.28294	0.05835	0.03160	0.50560	0.58834	0.06322	0.01694	0.03585	0.04469	0.01694	0.09081	0.29590	0.61373
						0.20035	0.16867	0.05474	0.44235	0.03421	0.20880		0.12235	0.08938	0.08938	0.06320	0.14163	1.51933	0.23174	1.61245	4.78036	1.15445	0.28294	0.09440	0.05010	0.36209	0.31282	0.09570	2.815197e-17	0.02240	0.03483	0.03160	0.12842	0.41300	0.33333
						0.14773	0.12169	0.04659	0.36202	0.17971	0.20810		0.03610	0.03462	0.08986	0.08662	0.09988	0.72656	0.31706	1.10125	2.64447	0.60653	0.48294	0.15800	0.01310	0.37965	0.22120	0.19611	0.04926	0.03585	0.09630	3.508305e-18	0.30919	0.52865	0.25000
						0.08259	0.09659	0.01850	0.28298	0.03662	0.14607		0.01746	0.04469	0.15410	0.19013	0.09639	0.72111	0.40851	1.11624	3.37076	0.23174	0.14347	0.11948	9.323444e-18	0.35701	0.27183	0.25348	0.03585	0.00000	0.11302	0.01694	0.29081	0.61665	0.14202
						0.13407	0.15646	0.19133	0.11394	0.22345	0.08759		0.04469	0.03610	0.25088	0.19013	0.07799	1.84391	0.21651	1.07703	1.02320	0.58941	0.52367	0.08000	0.06585	0.38652	0.07742	0.19050	0.05602	0.01694	0.09630	0.01466	0.22787	0.40479	0.41018
						0.02267	0.14132	0.16376	1.841860e-16	0.18747	0.06454		0.03610	0.05560	0.14994	0.31929	0.04906	2.65754	0.08294	2.04845	0.21651	0.08294	0.44721	0.25477	0.24612	0.40405	0.28709	0.23577	0.07877	0.05792	0.11393	0.01466	0.10919	0.21978	0.12842
						0.10722	0.23005	0.07741	0.09908	0.20438	0.05475		0.01777	0.10674	0.19150	0.37779	0.08662	3.20106	0.21651	2.04678	1.16619	0.44721	1.04906	0.32231	0.18240	0.33909	0.58096	0.15101	0.09520	0.05792	0.09993	0.03585	0.21965	0.13478	0.21959
						0.03160	0.08065	0.16867	0.10722	0.22378	0.05010		0.01746	0.13407	0.17740	0.40062	0.09159	1.04194	0.20000	2.00172	0.40000	0.60653	0.88404	0.23746	0.29138	0.35330	0.59941	0.19133	0.06319	0.07066	0.02240	0.03585	7.458242e-9	0.20000	0.20000
						1.620818e-16	0.03421	0.16867	0.10329	0.21815	0.03661		0.02469	0.21748	0.03160	0.45849	0.12122	1.04194	0.44721	2.52500	0.40851	0.52367	1.30666	0.01414	0.31918	0.14549	0.75363	0.03662	0.04468	0.05792	0.03168	0.03160	0.10919	0.69619	0.10919
						0.01853	0.04470	0.08259	0.12169	0.05340	0.02267		0.02246	0.10674	0.11662	0.45416	0.07066	1.81018	0.80852	2.16763	1.11051	0.21651	1.60428	0.15199	0.22787	0.16575	0.61604	0.05475	0.01694	0.05920	0.02073	0.00000	0.10919	0.71125	0.36823
						0.04469	0.06320	0.07066	0.16022	0.13968	0.03662		0.03160	0.14162	0.04788	0.33783	0.08355	2.25475	0.65372	2.82981	2.20023	0.08294	2.17145	0.03462	0.03421	0.17546	0.46061	0.02267	9.143402e-4	0.01694	0.03160	1.754152e-18	0.10919	0.82501	0.22787
						0.11394	0.17400	0.17787	0.07630	0.17650	0.14490		1.578874e-17	0.32540	0.03160	0.27866	0.05105	2.09252	0.69290	3.80526	3.73030	0.16555	2.00535	0.02488	0.14012	0.13950	0.23238	0.09570	0.05720	0.03388	0.03168	0.02073	1.341529e-8	0.71076	0.36818
						0.02616	0.11762	0.41201	0.03662	0.13407	0.16575		0.02469	0.24300	0.03462	0.39971	0.04469	2.60000	1.10125	4.40909	5.70931	0.65372	2.00477	0.25477	0.21198	0.18066	0.12973	0.07851	0.05070	0.02240	0.04854	0.00000	0.09081	0.63092	0.10919
						0.01850	0.06714	0.34163	0.06585	0.13029	0.11680		0.03405	0.13823	0.46246	0.41802	0.02247	1.86340	1.82771	4.60435	6.43746	1.00000	1.21093	0.28832	0.20438	0.30852	0.07066	0.05340	0.09630	0.01694	0.06543	0.03160	0.09081	0.14935	0.21965
						0.07066	0.14765	0.23467	0.10329	0.14304	0.15050		0.04469	0.28860	0.57808	0.39704	0.06320	1.16808	2.26167	5.12097	8.00517	0.71162	0.50000	0.16544	0.22497	0.36749	0.03421	0.02267	0.06320	2.192690e-18	0.02396	0.05141	0.14202	0.13366	0.21964
						0.04469	0.09583	0.12514	0.08065	0.10249	0.17787		0.08937	0.44511	0.77363	0.42518	0.12640	0.49140	1.57700	5.01004	9.88954	0.84853	0.28294	0.18902	0.40405	0.53017	0.07066	0.03160	0.04852	0.13407	0.01694	0.08615	0.21965	1.457225e-4	0.09081
						0.04469	0.12388	0.04469	0.06320	0.04503	0.05475		0.09988	0.33591		0.37779	0.17303	3.33333	0.91706	3.20624	10.99163	1.00638	0.37487	0.22588	0.34760	0.42313	0.14132	0.02281	0.06317	0.17876	0.03160	0.05141	0.20000	0.30827	0.09081
						0.06322	0.09583	0.15808	0.03662	0.15808	0.06714		0.12447	0.09988		0.41473	0.20449	3.72637	0.33798	2.73550	9.95594	0.80852	0.55972	0.16446	0.39966	0.14363	0.15800	0.01795	0.07066	0.15800	0.12414	0.07066	0.32225	0.51649	0.09081
						0.13216	0.03662	0.32365	0.03662	0.16867	0.08938		0.10761	0.44652		0.40814	0.20570	3.33598	0.31706	2.15407	8.56767	0.89443	0.72656	0.07066	0.42950	0.21233	0.25903	0.05184	0.07969	0.16871	0.08615	0.07066	0.35294	0.30893	0.09080
						0.07649	0.13407	0.21198	0.04136	0.14649	0.07741		0.13559	0.18902		0.39233	0.15803	3.09714	1.07433	2.94572	4.66905	1.18652	0.20000	0.11033	0.44240	0.32365	0.11244	0.07668	0.02073	0.14654	0.03483	0.03585	0.12842	0.10392	0.21965
						0.02930	0.12514	0.19449	0.11846	0.14072	0.13029		0.03462	0.46924		0.32677	0.07536	2.98110	0.96932	2.50157	4.08462	1.39726	0.52367	0.00000	0.22345	0.39453	0.33747	0.14078	0.03484	0.03585	0.19035	0.01694	0.09081	0.44777	0.10919
						0.10791	0.08759	0.11918	0.10722	0.15646	0.03662		0.01414	0.44014		0.24074	0.06320	2.60768	0.77021	3.02705	1.91886	1.33401	0.37487	0.00000	0.23863	0.39653	0.21659	0.15857	0.05069	0.01466	0.39782	0.04469	0.09081	0.09504	3.165687e-6
						0.08274	0.09480	0.07851	0.09313	0.15901	0.09993		0.03160	0.43700		0.30324	0.19010	2.29081	1.16584	2.02759	2.26317	1.33401	0.77021	0.05940	0.22787	0.04469	0.20313	0.09598	0.03483	0.02396	0.41270	0.09370	0.10919	0.10910	0.09081
						0.11394	2.609578e-17	0.04470	0.01850	0.12640	0.16113		0.06476	0.49158		0.22773	0.17272	2.82119	1.00638	1.66520	2.34763	1.13633	0.00000	0.03199	0.07630	0.09480	0.24177	0.09397	0.03161	0.02396	0.40888	0.06488	0.09081	0.13363	0.10919
						0.07066	2.566478e-17	0.01310	0.01310	0.08376	0.15800		0.01414	0.19311		0.36055	0.29562	3.06675	1.00638	1.01980	5.90305	1.39407	0.93814	0.05141	0.02267	0.21198	0.14363	0.15762	0.11974	0.01694	0.52944	0.09993	0.21965	0.14192	0.30466
						0.09993	0.03160	0.18960	0.01850	0.09908	0.16420		0.05207	0.04896		0.25833	0.35351	3.43981	1.37398	0.93862	4.56708	3.33543	0.88404	0.13857	0.03662	0.31654	0.27588	0.06446	0.06705	0.02396	0.28615	0.04468	0.22787	0.22345	0.21965
						0.09480	0.03662	0.07066	0.02267	0.11762	0.06454		0.02247	0.09440		0.11360	0.29536	3.16845	1.43545	0.72184	4.70860	3.08025	0.20000	0.18281	0.05178	0.35046	0.17017	0.07851	0.02427	0.03585	0.24259	0.07814	0.14202	0.14207	0.28284
						0.02267	0.05475	0.11394	0.03160	0.06320	0.07066		0.05560	0.08355		0.15896	0.27832	3.05048	1.42835	0.23174	3.80058	3.59974	0.28294	0.23611	0.09908	0.28500	0.22964	0.08756	0.02090	0.01694	0.24276	0.01439	0.21965	0.09092	0.36824
						0.04470	0.16376	0.08938	0.03160	0.07851	0.08259		0.04896	0.07066		0.20372	0.12719	2.73764	1.60000	0.08294	2.47487	3.62525	0.82462	0.12251	0.01310	0.07066	0.21048	0.03407	0.01464	1.754152e-18	0.15040	0.03570	0.30466	0.30949	0.20000
						0.06585	0.06454	0.08259	0.04659	0.04469	0.12909		0.02000	0.06476		0.25783	0.11344	2.05913	0.92081	1.02320	3.97567	3.56090	1.57050	0.11394	0.01850	0.04469	0.15164	0.05010	0.13118	0.00000	0.13029	0.01690	0.20000	0.19998	0.10919
						0.05923	0.08259	0.14012	0.05340	0.01850	0.16113		0.08938	0.06557		0.30584	0.16113	1.43545	0.68294	0.71706	4.83081	3.60555	2.07235	0.04469	0.02267	0.19480	0.12708	0.05010	0.04666	0.01466	0.08191	0.06475	0.14202	0.28318	0.20000
						0.07741	0.08844	0.04838	0.01853	0.08844	0.09659		0.07066	0.21368		0.27183	0.20829	1.65368	1.81108	1.28827	5.71887	2.82981	1.74359	0.08662	0.01850	0.35745	0.12180	0.08065	0.07274	1.754152e-18	0.05792	0.02076	3.234405e-9	0.22432	0.41464
						0.06322	0.09993	0.03662	0.03160	0.30832	0.06585		0.01746	0.19976		0.45244	0.28860	1.29843	1.74022	0.82462	6.43703	0.74443	1.79104	0.17602	0.04470	0.38872	0.04659	0.11897	0.12527	0.02073	0.06320	0.02243	0.10919	0.41709	0.44721
						0.03421	0.07630	0.02616	0.03421	0.36030	0.07066		0.03160	0.21357		0.99490	0.08662	0.56569	1.76304	0.88682	8.71321	0.40851	1.78176	0.06707	0.06320	0.05475	0.06320	0.17876	0.09185	0.01466	0.02396	0.03590	0.22787	0.21937	0.44721
						0.01310	0.06454	0.01850	0.01853	0.45934	0.05923		0.01746	0.16687		1.50888	0.09993	0.65372	2.14616	0.20000	7.64199	1.33401	2.26578	0.17602	0.03421	0.48361	0.31236	0.12972	0.17600	0.02073	0.10946	0.02066	0.20000	0.22852	0.44721
						0.02267	0.07066	0.03662	0.02267	0.49563	0.01310		0.01414	0.18683		2.06323	0.14491	0.71162	1.51706	0.30620	7.63062	1.65517	1.55769	0.15863	0.07741	0.41648	0.46387	0.10481	0.16232	0.04853	0.09480	0.03484	0.20000	1.16664	0.54706
						0.03160	0.24789	0.02267	0.01310	0.56262	0.07741		0.04788	0.01746		2.10319	0.12595	0.20000	0.79206	0.32773	6.24133	1.09590	1.34164	0.14125	0.12169	0.46050	0.60372	0.01858	0.12764	0.04631	0.16113	0.05074	0.28284	1.28167	0.32225
						0.01310	0.14823	0.04469	0.02267	0.41919	0.07085		0.03160	0.05207		1.91069	0.13559	0.82462	1.13137	0.95972	5.00000	0.16555	0.52271	0.20234	0.10481	0.47799	0.91649	0.15315	0.04886	0.02932	0.11393	0.03160	0.20000	1.08354	0.20000
						0.01850	0.17017	0.02267	0.05923	0.18825	0.03421		0.05207	0.04906		1.53192	0.22657	0.23174	0.72111	0.80000	3.40101	0.40851	0.68795	0.26888	0.08941	0.43772	0.96753	0.20354	0.07195	0.01466	0.09480	0.03483	0.20000	1.00075	0.41018
						0.03160	0.16867	0.07066	0.03662	0.10329	0.05010		0.16042	0.04574		1.20522	0.15863	0.28294	0.51706	0.93862	2.61721	0.58941	1.55740	0.30480	0.04659	0.28298	0.74007	0.17742	0.07692	0.02396	0.01694	0.09056	0.09081	1.05699	0.49081
						0.03662	0.25903	0.01310	0.02267	0.11394	0.11762		0.24345	0.04278		0.92414	0.20449	0.44721	1.06751	0.66337	3.10483	1.27302	1.21699	0.25477	0.10790	0.26622	0.70480	0.17160	0.01974	0.03166	0.04469	0.02396	0.21965	0.14177	0.41464
						0.03662	0.36030	0.06454	0.08065	0.03662	0.23888		0.33581	0.11978		0.82143	0.25691	0.51042	0.28284	0.14347	2.57360	1.84391	2.00876	0.25212	0.13029	0.33512	0.53953	0.03425	0.06476	0.02406	0.10206	0.05141	0.22787	0.22308	0.51829
						0.03160	0.22345	0.06585	0.07741	0.08759	0.05178		0.32468	0.19250		0.90952	0.29134	0.60571	0.28284	1.27302	2.60768	1.89893	3.07992	0.21867	0.06320	0.36209	0.47639	0.11244	0.06074	0.01670	0.08938	0.05602	0.31063	0.09640	0.69106
						0.15854	0.09908	0.01853	0.10791	0.25357	0.08844		0.28814	0.29234		0.76158	0.11033	0.14347	0.23174	1.52121	2.05084	2.00000	2.30356	0.10247	0.14649	0.27664	0.60328	0.24879	0.06316	0.03120	0.12753	0.04926	0.21965	0.28306	0.48468
						0.06454	0.09993	0.04469	0.05781	0.34320	0.08376		0.17783	0.23218		0.57675	0.09993	0.28294	0.41678	2.64272	2.31055	1.48982	1.49961	0.04574	0.09128	0.39966	0.62639	0.30529	0.10211	6.470189e-5	0.14336	0.05602	0.35294	0.22892	0.51829
						0.03661	0.08065	0.03421	0.09996	0.27183	0.22159		0.08000	0.16466		0.48311	0.09584	0.00000	0.40851	2.98507	1.44222	1.28062	1.24118	0.06320	0.04469	0.44353	0.55557	0.35182	0.06711	0.03134	0.08191	0.03483	0.21965	0.14226	0.50281
						0.05178	0.08065	0.03160	0.09573	0.29811	0.38443		0.06557	0.24040		0.29536	0.01450	0.11729	0.49001	2.92617	1.81623	1.07075	0.40000	0.04469	0.19222	0.36746	0.63179	0.33013	0.05602	2.953769e-5	0.11174	0.06488	0.22787	0.10869	0.44721
						0.03421	0.11918	0.05178	0.05475	0.20114	0.15908		0.06476	0.04906		0.39778	0.02261	0.08294	0.65372	3.09445	1.46973	0.94281	0.48995	0.11360	0.27269	0.31677	0.71012	0.35959	0.03585	0.94366	0.09253	0.02240	0.09081	0.22286	0.52999
						0.06454	0.06454	0.09128	0.08065	0.08938	0.04838		0.05207	0.07066		0.20754	0.03460	0.89066	0.86054	3.29747	1.65368	0.52844	0.40851	0.16113	0.33512	0.26813	0.73558	0.31600	0.02240	0.95083	0.03585	0.06543	0.20000	0.09504	0.50919
						0.10948	0.11202	0.08938	0.06454	0.12973	0.01310		0.03462	0.02247		0.38071	0.03461	0.48294	1.07703	3.84708	1.34164	0.39633	0.69290	0.04788	0.32508	0.35119	0.57100	0.22787	0.09993	0.94950	0.03160	0.04469	0.09081	0.21901	0.22787
						0.14132	0.08759	0.08065	0.01310	0.14830	0.03421		0.02247	0.03610		0.67189	0.05561	0.93862	1.00536	2.02498	1.23052	0.41678	0.60571	0.25609	0.35061	0.33512	0.65242	0.19133	0.07832	0.94144	0.03585	0.05141	0.10919	0.22861	0.30919
						0.20880	0.13660	0.04136	0.09583	0.31627	0.17746		0.02247	0.05560		0.74267	0.08003	0.11706	1.20185	0.31706	1.93429	1.10125	0.40000	0.33778	0.11405	0.36030	0.60523	0.19228	0.13029	0.97291	0.03585	0.03160	0.10919	0.20008	0.21965
						0.30701	0.19133	0.05923	0.24066	0.20278	0.14304		7.455152e-18	0.14691		0.89905	0.07788	0.48995	1.13104	0.60571	1.83716	0.61131	0.40851	0.37233	0.13968	0.26813	0.34785	0.21438	0.17266	0.07832	0.01694	0.02240	0.14202	0.10897	0.09081
						0.25276	0.14304	0.15809	0.39595	0.23643	0.26152		0.02469	0.31121		1.23078	0.05833	1.08611	1.31133	1.81700	2.44955	0.80852	0.48294	0.42764	0.13660	0.20229	0.18961	0.23863	0.11076	0.05141	0.02240	0.02396	0.10919	0.14963	0.10919
						0.20851	0.15808	0.06320	0.32658	0.22159	0.14773		0.01414	0.46657		1.41100	0.04470	0.44721	1.34164	1.69706	1.91999	0.60000	1.15445	0.44273	0.06454	0.08274	0.27161	0.26622	0.02073	0.03585	0.00000	0.02396	0.20000	0.13042	0.14202
						0.30454	0.08259	0.05923	0.40513	0.32226	0.06454		0.02000	0.67440		1.34201	0.04467	1.51933	1.03926	2.29168	1.90098	0.66269	0.65372	0.09480	0.13029	0.13029	0.37981	0.22787	0.02396	0.09370	0.02073	0.03160	0.12842	0.21885	0.10919
						0.22497	0.10722	0.04469	0.31122	0.07066	0.22867		0.03160	0.50360		1.51053	0.01410	1.06751	1.28062	3.46778	1.86110	0.36086	0.55972	0.24479	0.13029	0.11405	0.53466	0.14304	0.06488	0.04469	0.00000	0.02073	0.14202	0.13358	0.30919
						0.13216	0.07742	0.01850	0.14765	0.03662	0.08274		0.02247	0.55908		1.55912	0.01414	0.21651	1.87279	2.49098	1.41421	0.94281	1.29266	0.23965	0.03421	0.08065	0.55734	0.16974	0.19221	0.04469	0.02240	0.01466	0.20000	0.13358	0.20000
						0.11408	0.03160	0.09570	0.07851	0.08170	0.17110		0.07066	0.66310		1.50702	2.808005e-18	0.08294	0.52271	1.57295	2.47386	0.63803	1.45508	0.28817	0.09908	0.05475	0.41563	0.18747	0.14845	0.03160	0.03585	0.03585	0.20000	0.09120	0.22787
						0.14671	0.03160	0.03662	0.08065	0.11554	0.11394		0.03610	0.60136		1.10262	0.01414	0.60571	0.77021	1.26491	3.17428	0.61131	0.48995	0.21199	0.04469	0.12640	0.38051	0.07066	0.14918	0.01694	0.02240	0.02240	0.20000	3.621184e-9	0.20000
						0.11908	0.03421	0.08759	0.15800	0.05340	0.02267		0.04469	0.62108		0.82942	0.02000	0.35355	0.80000	1.53019	4.08378	0.08294	1.82745	0.33497	0.02267	0.38221	0.26927	0.16867	0.12267	0.01466	0.03585	1.754152e-17	0.10919	0.31192	0.20000
						0.01332	0.01310	0.05923	0.15050	0.22345	0.25477		0.04469	0.59649		0.88594	0.04574	0.62479	1.44222	1.61245	3.92217	0.08294	1.07696	0.38755	0.04105	0.23580	0.18430	0.11897	0.16721	0.00000	0.04469	0.01466	0.20000	0.28321	0.15442
						0.03647	0.01310	0.05923	0.12169	0.17787	0.18347		0.03462	0.47499		0.63438	0.04469	1.33333	0.89443	1.60215	5.33667	0.80429	0.46821	0.27904	0.09313	0.16420	0.14020	0.05474	0.13029	4.576651e-4	0.01466	0.02240	0.29081	0.35864	2.240707e-8
						0.07753	0.02616	0.08759	0.04838	0.08938	0.16167		0.01746	0.34071		0.78174	0.03462	1.29907	0.23174	0.40851	3.69656	0.40000	1.08897	0.19652	0.17110	0.24853	0.16632	0.03662	0.14455	0.01453	2.150178e-17	0.22073	0.28284	0.22320	0.10919
						0.12192	0.01853	0.08844	0.08170	0.15800	0.12775		0.04788	0.20234		0.94561	0.03160	1.26491	0.68795	0.40000	3.01882	0.82462	5.76740	0.28328	0.13899	0.26567	0.07852	0.05475	0.13029	0.01716	0.02240	0.22726	0.49115	0.50049	0.14202
						0.10003	0.01310	0.01850	0.01850	0.14649	0.09908		0.03160	0.08986		1.07440	0.05560	2.12030	0.11706	0.37487	3.00666	0.95972	4.12311	0.40814	0.17017	0.12775	0.07628	0.05475	0.38201	0.03179	0.05071	0.21942	0.49914	0.40000	0.10919
						0.11391	0.01310	0.08844	0.04838	0.12388	0.12169		0.03610	0.07065		1.03511	0.08355	3.61110	0.44721	0.89443	3.17428	0.66337	4.52818	0.44912	0.11897	0.42313	0.06582	0.13407	0.09630	0.01443	0.05141	0.26208	0.29081	0.09504	0.10919
						0.07736	0.04470	0.21077	0.10481	0.11680	0.12514		0.10526	0.13807		0.94070	0.14132	4.00500	0.44839	1.23290	3.91607	0.72656	5.16867	0.46977	0.49056	0.65983	0.08259	0.14132	0.14678	1.708049e-4	0.01694	0.28263	0.38162	0.28303	0.10919
						0.09284	0.03421	0.17315	0.41563	0.12775	0.12180		0.11360	0.16113		0.53664	0.08189	4.52592	0.44721	1.12318	3.95192	1.29843	5.67907	0.37127	0.31915	0.61945	0.09563	0.14830	0.11174	0.02401	0.04853	2.447712e-6	0.41464	0.35852	7.176245e-9
						0.08036	0.01850	0.15331	0.36951	0.09659	0.08170		0.15896	0.09480		0.44404	0.19125	3.86706	0.40000	1.08294	2.84253	1.20286	7.22887	0.17740	0.69093	0.55841	0.06585	0.17161	0.04853	0.04937	0.01694	0.01466	4.534709e-6	0.22513	0.20000
						0.10317	0.03662	0.36852	0.41702	0.15854	0.05178		0.03462	0.03160		0.42513	0.18764	2.48294	0.33798	1.26491	1.19146	1.03926	8.61383	0.27755	0.75600	0.41201	0.09655	0.24268	0.28075	0.05795	8.770762e-18	0.02237	0.10919	0.28341	0.10919
						0.03160	0.03160	0.49361	0.58744	0.04470	0.00000		0.04469	0.02000		0.35330	0.32613	0.89443	0.20000	0.51042	0.85660	1.21655	8.39977	0.32991	0.74341	0.19222	0.05475	0.33866	0.03585	0.08418	0.03585	3.322380e-5	0.50919	0.44754	0.10919
						0.05923	0.02267	0.13534	0.71776	0.16974	0.01310		0.04493	0.14819		0.40296	0.39334	0.40000	0.20000	0.40851	0.29484	0.69290	7.54506	0.01746	0.96348	0.05923	0.02267	0.27183	0.10206	0.11255	0.04313	0.10650	0.41017	0.32622	0.10919
						0.03661	1.754152e-18	0.17876	0.35330	0.27058	0.01310		0.06651	0.12235		0.57954	0.45337	0.44839	0.42495	0.50000	0.65372	0.74443	5.91492	0.25783	0.73974	0.13597	0.02267	0.16376	0.07969		0.06092	0.01466	0.36824	0.32553	0.15442
						0.04469	0.01853	0.17637	0.33190	0.42160	0.09908		0.09965	0.09639		0.62974	0.48002	1.04906	1.15445	0.92399	0.55972	0.60571	4.84834	0.28328	0.48890	0.07066	0.03160	0.16376	0.06488		0.04856	0.06486	0.58008	0.29587	0.10919
						0.03160	0.03160	0.06714	0.34592	0.39425	0.09313		0.03491	0.21279		0.69950	0.63413	0.95972	0.40851	3.71881	1.08611	0.55972	5.28394	0.37960	0.61408	0.13029	0.01310	0.18207	0.13751		0.04853	0.03479	0.69105	0.30703	0.00000
						0.02267	0.04470	0.23539	0.20973	0.42981	0.21198		0.02247	0.09993		0.73974	0.89771	2.60768	1.34385	2.37171	1.00000	0.72184	7.17089	0.39087	0.91882	0.09480	0.03160	0.21048	0.18426		0.03160	0.04469	1.09625	0.10814	0.09081
						0.03160	0.01850	0.01853	0.15315	0.34903	0.27817		0.01453	0.17812		0.67201	1.23880	4.25516	1.00050	2.28294	1.20000	0.80429	7.33485	0.19652	0.44752	0.13029	0.03421	0.24348	0.17995		0.01464	0.03585	1.14246	0.22501	0.21965
						0.02267	7.192025e-17	0.02616	0.11480	0.28230	0.27703		0.02469	0.16113		0.50978	1.25209	4.97741	1.11051	1.38321	0.68294	0.74443	8.98220	0.06707	0.86401	0.06454	0.03160	0.34806	0.16871		0.03483	0.04469	0.69005	0.14104	0.16053
						0.03421	0.01310	3.162343e-17	0.34903	0.24348	0.15164		0.03462	0.11394		0.54636	1.30100	3.16228	1.41421	0.20000	0.44721	0.82462	8.46888	0.16427	0.57298	0.15315	0.01309	0.47664	0.04854		0.02240	0.01466	0.21946	0.10421	0.21404
						0.03421	0.01310	0.08376	0.66373	0.25776	0.24853		0.03610	0.11360		0.49730	1.53149	4.64077	1.15447	0.44721	0.28294	0.32773	8.28900	0.19040	0.26152	0.25280	0.07063	0.41884	0.02396		0.07968	0.04853	2.501566e-4	0.14104	0.18199
						0.02616	0.04470	0.07066	0.90244	0.29811	0.23853		0.02469	0.03610		0.51441	1.90093	3.52471	0.28284	0.52367	0.48294	0.40852	6.00333	0.21198	0.24005	0.09570	0.07056	0.24268	0.01694		0.04926	0.08615	1.747301e-4	0.21862	0.13649
						0.01310	0.01850	0.09313	1.15681	0.40102	0.29134		0.01414	0.05105		0.54900	1.39685	2.50483	0.37487	0.40851	0.80429	0.66371	6.60052	0.12595	0.26999	0.04470	0.07057	0.18735	0.16721		0.03483	0.01694	0.30234	0.22867	0.20000
						0.03662	9.878726e-9	0.15800	1.40185	0.60523	0.41323		1.463779e-23	0.21867		0.77661	1.55283	3.41175	0.51042	0.63246	1.07703	0.84934	6.01332	0.13442	0.31620	0.08065	0.06582	0.05010	0.16995		0.07968	0.06542	0.49458	0.15216	0.10919
						0.07066	0.03421	0.24607	1.10762	0.37507	0.66002		0.01746	0.31600		0.63800	1.54236	5.20000	0.46859	0.52271	0.21651	0.99996	5.56347	0.19173	0.10791	0.11680	0.05344	0.15800	0.07832		0.03483	0.03692	0.19946	0.41023	0.15442
						0.15050	0.01850	0.22963	0.81699	0.25155	0.64524		0.02000	0.44689		0.66046	1.19455	4.93331	0.74536	0.63246	0.44839	1.08294	5.43323	0.35179	0.13407	0.21855	0.01310	0.15050	0.07969		0.04853	0.00000	2.791875e-4	0.41023	0.15442
						0.17315	0.12169	0.30928	0.54259	0.21748	0.44523		0.03160	0.21357		0.49361	0.74955	6.20000	1.20185	0.28294	0.77086	1.03911	5.55258	0.49158	0.05923	0.08938	0.02924	0.16867	0.05602		0.01694	0.02396	0.36827	0.29118	0.14202
						0.14764	0.03160	0.37174	0.22378	0.05010	0.31915		1.534883e-17	0.19382		0.51670	0.73144	5.74846	1.16808	0.55972	0.90907	0.89451	4.60001	0.44132	0.16376	0.16113	0.01302	0.32324	0.06705		0.01466	0.03788	0.14209	0.14104	0.20000
						0.17628	0.06585	0.33590	0.10790	0.03418	0.20880		0.01414	0.13407		0.48624	0.68888	4.11706	1.13137	0.61131	1.30929	0.89544	4.33333	0.34720	0.12169	0.14363	0.03658	0.25672	0.03160		0.05602	0.01694	0.14205	0.22261	0.10919
						0.17928	0.02616	0.24670	0.21709	0.05340	0.01850		0.03160	0.19584		0.52307	0.41864	4.52149	1.75529	0.67862	1.57050	0.71111	0.51033	0.19192	0.12388	0.08259	0.04470	0.18347	0.08938		0.07066	0.03585	2.946509e-5	0.10504	0.15442
						0.06382	0.04838	0.29427	0.07742	0.01850	0.09570		0.03160	0.16113		0.46118	0.63147	2.10207	1.48982	0.72184	1.49928	0.39935	0.53119	0.04896	0.11762	0.10481	0.05178	0.19561	0.13619		0.01466	0.03160	0.15443	7.237724e-10	0.15442
						0.05241	0.05474	0.16097	0.07851	0.10948	0.09659		0.01746	0.50110		0.40815	0.50543	1.93429	0.84856	0.56569	1.49961	0.48925	0.14347	0.08355	0.01853	0.12169	0.06454	0.18426	0.13566		0.07066	0.02240	0.14200	0.14898	0.20000
						0.03012	0.04838	0.05504	0.18960	0.17400	0.08759		0.01746	0.65203		0.33347	0.62065	1.85119	0.99024	0.33798	1.00000	0.68640	0.00000	0.04788	0.09480	0.26058	0.07630	0.05003	0.07066		0.05141	0.01694	0.19999	0.10504	0.20000
						0.03889	0.13660	0.04660	0.33866	0.24680	0.09908		0.03160	0.65888		0.27886	0.74094	2.35702	0.57772	0.53015	0.41678	0.27543	0.21651	0.10986	0.04659	0.27664	0.03662	0.07066	0.01484		0.03160	0.01694	0.21962	0.09607	0.20000
						0.03490	0.09993	0.09677	0.33519	0.24066	0.03662		0.02247	0.55796		0.18872	0.86943	3.04619	1.00683	0.40000	0.90476	0.36857	0.34649	0.04906	0.03160	0.43572	0.03662	0.08844	0.02240		0.07832	0.01466	0.14203	0.28284	0.10919
						0.04469	0.16619	0.09911	0.32826	0.15646	0.08170		3.443481e-8	0.45073		0.18872	0.95273	2.28464	0.82462	0.52271	0.69244	0.75086	0.40851	0.15800	0.13968	0.54793	0.05340	0.14649	0.03160		0.07830	0.01466	0.22785	0.22418	0.09081
						0.03421	0.13660	0.14773	0.33866	0.11680	0.06454		0.01746	0.46003		0.31282	0.97830	2.81426	0.49001	0.65372	0.66613	0.37786	0.16555	0.14994	0.04659	0.41730	0.05923	0.27334	0.08191		0.05602	0.01466	0.35295	1.16793	8.746133e-10
						0.01850	0.13534	0.31835	0.28786	0.10948	0.05178		0.14728	0.38480		0.07802	0.98299	3.20000	1.20000	1.30929	2.05046	0.47140	0.40000	0.15713	0.05340	0.33866	0.06320	0.15904	0.14132		0.06265	0.22073	0.40000	1.25127	0.14202
						0.06455	0.03662	0.24348	0.03661	0.13597	0.16420		0.10674	0.21624		0.01746	0.78706	2.84734	0.08294	0.70752	1.41173	1.67705	0.34649	0.18872	0.15908	0.55863	0.06321	0.18835	0.21583		0.05602	0.23450	0.41018	1.30661	0.09081
						0.16867	0.03421	0.36195	0.02616	0.05178	0.05923		0.12878	0.12595		0.04469	0.81739	2.51495	0.20000	0.85660	1.33272	1.82771	0.51042	0.14728	0.14830	0.16974	0.05474	0.11767	0.20566		0.12267	0.21381	0.44724	1.11929	0.21965
						0.20229	0.05474	0.19561	0.02267	0.01310	0.02616		0.14128	0.12122		0.07863	1.14625	2.43311	0.28284	1.13137	1.09518	0.28284	0.40851	0.08066	0.05474	0.27183	0.06454	0.08938	0.26068		0.05602	0.24066	0.28284	1.27427	0.09081
						0.29400	0.04469	0.23441	0.01310	0.05475	0.05340		0.14881	0.09993		0.07802	1.26358	1.95762	0.21651	1.42387	2.15414	0.80429	0.49001	0.08986	0.28264	0.36993	0.03161	0.19220	0.35652		0.13432	0.25420	1.22551	0.53459	0.10919
						0.26999	0.05475	0.18825	0.01853	0.04659	0.05923		0.01410	0.12447		0.04574	1.40191	1.13137	0.20000	0.61131	2.94642	0.48995	0.40000	0.06557	0.27734	0.92645	0.01850	0.16637	0.40372		0.04926	0.04926	1.27259	0.41107	0.10919
						0.27487	0.01850	0.15800	0.03160	0.02267	0.01853		0.09635	0.03610		0.19652	1.23887	0.79146	0.60000	0.80000	3.10077	1.20570	0.11706	0.05207	0.33686	1.01764	0.05340	0.09918	0.27183		0.05792	0.04469	1.13854	0.40930	0.12842
						0.09659	0.02616	0.03160	0.04659	0.01310	0.01310		0.07802	0.05105		0.05560	1.13804	0.91706	0.11706	0.84853	3.04619	1.88657	0.11706	0.08986	0.43906	0.77087	0.00000	0.16170	0.22726		0.06705	0.04469	0.99996	0.53459	1.678719e-8
						0.07066	0.01850	0.10722	0.07742	0.04469	0.03160		0.07863	0.07066		0.11226	0.58268	1.40245	0.16555	0.50000	2.51247	0.65372	0.11706	0.13632	0.28333	0.33591	0.02616	0.08755	0.12567		0.04926	0.04926	0.99995	0.32136	0.12831
						0.04469	0.03662	0.09659	0.11394	0.03662	0.06585		0.09993	0.03610		0.03462	0.44805	1.42830	0.11706	0.49140	2.28444	0.51042	0.00000	0.14405	0.22197	0.27734	0.05475	0.06582	0.17894		0.11011	0.02240	0.09145	0.31145	0.14168
						0.05475	0.03160	5.391817e-3	0.08759	0.03421	0.05475		0.07863	0.18426		0.03610	0.29811	1.29843	0.11706	0.52844	0.95972	1.49636	0.29484	0.11314	0.23005	0.19480	0.05475	0.03662	0.34175		0.07066	0.03160	0.20037	0.44563	0.09061
						0.06631	0.09480	0.05010	0.13534	2.654514e-17	0.06454		0.13407	0.18426		0.16687	0.12882	1.70656	0.61131	0.46859	0.77021	0.93862	0.35355	0.04574	0.32226	0.13216	0.03662	0.05010	0.42495		0.04854	0.01694	0.09076	0.20787	0.14143
						0.06457	0.11480	0.03206	0.09313	0.03662	0.02267		0.12235	0.12447		0.08355	0.23800	1.28827	0.14347	0.51706	0.69299	0.41678	0.47140	0.01414	0.16634	0.12642	0.04469	0.01849	0.47348		0.03160	0.07969	0.21970	0.22257	0.77517
						0.18136	0.11244	0.05010	0.06714	0.05178	0.04469		0.12235	0.15800		0.10247	0.23577	0.80429	0.08294	0.37532	0.94281	2.84734	1.05409	0.03610	0.23853	0.28874	0.03661	0.05478	0.48553		0.09993	0.14966	0.15446	0.28222	0.77507
						0.19558	0.15908	0.10790	0.20270	0.02616	0.02267		0.09272	0.38192		0.05207	0.15875	0.61131	0.23174	0.41647	1.49071	3.86088	1.25429	0.02000	0.36987	0.15808	0.21077	0.05475	0.18162		0.05602	0.08615	0.14202	0.22805	0.70686
						0.20205	0.15854	0.07742	0.27183	0.01853	0.05229		0.10247	0.06320		0.12719	0.11662	0.72184	0.16555	0.29498	0.96358	4.01473	0.90531	0.04469	0.47124	0.12169	0.23539	0.05474	0.06494		0.04469	0.03160	0.09084	0.09632	0.70710
						0.06667	0.06571	0.21077	0.20645	0.01853	0.08994		0.07066	0.05835		0.14386	0.16449	0.56569	0.14347	0.49073	1.15234	5.88218	1.69478	0.05105	0.26813	0.12708	0.30370	0.03160	0.06313		0.03585	0.03160	0.10919	0.21914	0.78631
						0.03662	0.06630	0.24348	0.15646	0.02267	0.03481		0.05560	0.07066		0.08662	0.17740	1.52157	0.11706	0.29488	1.12577	6.96761	1.34164	0.02469	0.10722	0.25541	0.29811	0.09659	0.05800		0.03160	0.03585	0.09081	0.09632	1.749212e-8
						0.19561	0.05192	0.20034	0.12505	0.03160	0.16625		0.04469	0.09440		0.19986	0.05207	1.68294	0.29484	0.39989	1.00343	5.55031	1.01980	0.05835	0.09480	0.35751	0.28260	0.05475	0.08396		0.06320	0.06543	0.12842	0.21914	0.10919
						0.16167	0.01328	0.30832	0.35588	0.02616	0.09542		0.03462	0.19311		0.21198	0.08938	1.88476	0.51042	0.33751	1.34711	5.80327	0.56569	0.04906	0.19005	0.65356	5.616028e-17	0.04469	0.06323		0.06320	0.05071	0.09074	0.13893	0.10919
						0.14552	0.03104	0.28009	0.41884	0.03662	0.16858		0.05105	0.13361		0.05560	0.03160	2.20907	0.28294	0.51718	1.28827	8.40952	0.77021	0.31757	0.09993	0.68354	0.01850	0.07851	0.10643		0.16113	0.05141	0.30919	1.232967e-8	0.10919
						0.10864	0.05329	0.08938	0.25348	0.03662	0.19231		0.01414	0.10938		0.11394	0.07066	2.34076	0.23174	0.55473	1.80191	2.74921	0.44839	0.32058	0.20234	0.87401	0.08759	0.07851	0.07964		0.17186	0.05141	0.32225	0.09632	0.15442
						0.03661	0.10051	0.10722	0.14132	0.04659	0.11345		4.182225e-25	0.11175		0.25783	0.11360	2.72138	0.08294	0.32802	2.52982	1.32225	0.30620	0.25232	0.25701	1.04197	0.05923	0.08259	0.11390		0.15758	0.06705	0.32225	1.241112e-8	0.20000
						0.12640	0.07052	0.09908	0.09993	0.05475	0.05475		0.01746	0.09988		0.49462	0.09639	3.37828	0.23174	0.44742	3.17428	0.55972	0.30620	0.26197	0.51123	1.18276	0.09659	0.08274	0.11006		0.21924	0.05602	0.10919	0.31743	0.10919
						0.05475	0.11492	0.09570	0.09659	0.05923	0.11330		0.01746	0.14405		0.71293	0.20424	2.89930	0.51042	0.57768	3.68480	1.30666	0.48995	0.20254	0.41643	0.79748	0.13407	2.806729e-16	0.06942		0.19686	0.03160	0.50918	0.08975	0.10919
						0.11762	0.10943	0.03421	0.36560	0.04838	0.05340		0.01414	0.33330		0.79000	0.26732	2.88021	1.30666	0.29484	2.55726	4.31706	0.37487	0.41570	0.83141	0.49666	0.12900	0.05475	0.07784		0.07926	0.01466	0.10896	0.08975	0.00000
						0.36557	0.11229	0.02616	0.24268	0.03924	0.09570		0.03462	0.28109		0.88986	0.18426	2.99186	1.82745	0.28294	1.41421	0.21651	0.84853	0.54091	0.43560	0.30003	0.08259	0.11897	0.06483		0.03480	0.03160	0.10921	0.13359	0.14202
						0.23539	0.07734	0.01853	0.22378	0.07851	0.17876		0.07802	0.28494		0.90203	0.17592	2.33742	2.16333	0.28294	0.79206	0.28294	1.34164	0.60784	0.72583	0.12640	0.13031	0.19222	0.18919		0.03568	0.02073	0.14202	0.13794	1.158778e-8
						0.22087	0.07846	0.04469	0.28230	0.06585	0.28667		0.09440	0.18902		0.76268	0.26714	0.62852	2.16401	0.21651	1.72047	0.31706	1.84391	0.60784	0.12973	0.08274	0.08259	0.29446	0.06804		0.06283	0.03160	0.21964	2.825990e-8	0.14202
						0.19611	0.06710	0.04659	0.34041	0.04469	0.13407		0.06469	0.14886		0.46418	0.15604	0.72963	2.06695	0.11706	3.03510	0.21651	1.86077	0.55557	0.18426	0.04469	0.11330	0.12111	0.06670		0.03159	0.04626	0.14201	3.203217e-10	0.14202
						0.22087	0.06955	0.04469	0.05010	0.03160	0.49158		0.06707	0.30480		0.18426	0.30255	0.72963	1.37398	0.40851	1.93783	0.60570	1.98703	0.33371	0.10791	0.05923	0.03160	0.19005	0.03524		1.121855e-4	0.01466	0.43709	0.13893	0.09081
						0.08065	0.05340	0.01850	0.01850	0.02267	0.51828		0.08264	0.07802		0.11314	0.53929	0.45568	1.02320	0.20000	2.21812	2.81581	2.45209	0.17272	0.24066	0.08938	0.08065	0.19939	0.04340		0.01465	0.01466	0.36825	0.08975	4.218646e-8
						0.20234	0.07066	0.03662	0.03421	3.508305e-18	0.49590		0.03903	0.11662		0.03462	0.36723	1.24072	0.76414	0.28284	2.89036	4.69822	2.86356	0.09272	0.36852	0.09480	0.08926	0.14132	0.05088		0.02241	0.03585	0.14202	0.09952	3.093152e-8
						0.34592	0.06227	0.07066	0.06454	1.225261e-27	0.40513		0.04469	0.04469		0.16113	0.43700	1.24072	0.80490	0.20000	2.37612	4.62264	3.00390	0.12640	0.09570	0.08938	0.08065	0.17017	0.04967		0.03168	0.03483	0.29081	0.10076	2.186509e-9
						0.37507	0.01850	0.05475	0.11405	0.03160	0.36202		0.08264	0.22345		0.08066	0.51441	1.24072	2.91810	0.83638	1.60276	5.83095	3.43981	0.08355	0.04470	0.23643	0.20438	0.30526	0.07879		0.02243	0.11173	0.67500	0.14278	0.09081
						0.50795	0.02267	0.02267	0.04469	0.03421	0.19561		0.05207	0.31282		0.04469	0.35329	3.00634	3.53061	1.28062	1.94388	6.94988	4.38634	2.505815e-16	0.18825	0.24853	0.06714	0.31392	0.01665		2.867873e-6	0.04469	0.15392	0.10076	0.10919
						0.45625	0.03662	0.06585	0.02267	0.04469	0.38051		2.631229e-17	0.18426		0.22165	0.36312	2.61565	2.86356	1.28062	1.96977	1.85085	4.42674	0.04788	0.33591	0.32226	0.13660	0.17315	0.03107		0.02396	0.04469	0.32225	0.14278	0.13649
						0.06714	0.01310	0.03421	0.08970	0.04469	0.45037		0.02469	0.17828		0.28860	0.45656	1.28827	2.66833	1.28030	2.68549	1.62304	4.34894	0.02247	0.32743	0.14363	0.04830	0.12505	0.02995		0.03587	0.05602	0.30906	0.21920	0.18199
						0.08938	0.05340	0.03421	0.11407	0.08259	0.56528		0.03781	0.15800		0.53489	0.64263	1.49961	2.79967	1.44222	2.12030	1.38321	3.36652	0.10675	0.40220	0.19228	0.16420	0.22680	0.03358		2.233821e-4	0.11393	1.02420	0.10185	0.37978
						0.15315	0.03160	0.01310	0.08480	0.08844	0.55277		0.01453	0.05560		0.56495	0.69610	0.32773	2.03961	0.51052	2.84134	1.46973	3.51782	0.02469	0.33591	0.26877	0.05923	0.31758	0.06513		0.02395	0.06543	0.73166	0.14015	0.28483
						0.23863	0.03421	0.05010	0.10870	0.08376	0.39874		0.06800	0.07066		0.57764	0.36852	0.52367	0.91706	0.34649	2.81009	1.67799	2.81651	0.04469	0.34181	0.30526	0.13029	0.29811	0.04429		0.01694	0.05141	0.96643	3.392287e-8	0.28284
						0.30028	0.06320	0.03160	0.15050	0.06320	0.05010		0.05520	0.04788		0.49730	0.14054	1.03926	2.40285	0.28294	2.80123	2.50599	2.15407	0.13442	0.21048	0.24680	0.03421	0.13029	0.03120		0.01466	0.02073	0.91346	0.20000	0.21965
						0.17017	0.07851	0.03160	0.12514	0.03662	0.32616		0.05835	0.06320		0.32534	0.13029	0.44721	3.10483	0.31706	2.03961	3.23562	0.44721	0.10247	0.03421	0.32616	0.09480	0.07742	0.04847		0.03160	0.11302	0.96033	0.49843	0.28284
						0.22087	0.06454	0.01850	0.03662	0.04469	0.44490		0.04896	0.21867		0.09993	0.49446	1.44729	2.84134	0.23174	1.40245	3.34636	0.77021	0.09585	0.25701	0.23863	0.09993	0.05654	0.03468		0.03483	0.08857	3.588127e-9	0.50167	0.22787
						0.21626	0.05475	0.05340	0.06714	0.05475	0.35758		0.03610	0.28919		0.12595	0.67848	0.63245	2.41662	0.30620	0.68294	3.67178	1.72982	0.11360	0.12505	0.23222	0.12169	0.18961	0.04760		9.232763e-17	0.19986	0.20000	0.53403	0.14202
						0.28565	0.06322	0.02267	0.16575	0.03354	0.13029		0.03610	0.25025		0.06476	0.68068	0.92716	2.61535	0.33798	0.71706	4.38634	1.91992	0.34760	0.15854	0.05340	0.21283	0.15317	0.04476		9.837339e-17	0.09993	0.22787	0.60365	0.10919
						0.33187	0.07085	0.04659	0.10481	0.17860	0.14607		0.04469	0.18218		0.07734	0.55636	0.96932	1.00683	0.32773	0.40851	4.44348	1.83542	0.43441	0.16113	0.12640	0.02267	0.21811	0.03162		0.03585	0.16463	0.09081	0.40000	0.14202
						0.08274	0.03662	0.03421	0.08259	0.46307	0.23290		0.14994	0.18710		0.16492	0.46122	0.49001	0.48294	0.28284	0.48995	4.39480	0.36086	0.38860	0.19075	0.19005	0.04468	0.17876	0.06487		0.04926	0.03160	0.22787	0.30170	0.15442
						0.03661	0.10329	0.01850	0.20355	0.31631	0.15331		0.12122	0.21198		0.13407	0.30219	0.61131	0.23174	0.28294	0.44721	4.21171	0.79057	0.40811	0.05267	0.17685	0.09312	0.14132	0.03359		0.04469	0.03437	0.22787	0.09862	0.15442
						0.01310	0.08259	0.03160	0.14773	0.28256	0.11762		0.11662	0.34034		0.05105	0.20945	0.23174	0.34649	0.34649	0.34649	4.09534	0.44721	0.41080		0.12180	0.07103	0.19561	0.04346		0.01694	0.01694	0.14202	0.20042	0.10919
						0.03421	0.08065	0.02267	0.08274	0.15324	0.17210		0.11360	0.26075		0.14405	0.17828	1.11051	0.36855	0.20000	0.80000	4.31629	0.32773	0.06320		0.42310	0.05039	0.27098	0.01509		0.03585	0.02240	0.10919	0.10964	1.224448e-8
						0.05475	0.09480	0.01850	0.09908	0.21815	0.10329		0.09639	0.17546		0.12882	0.25468	0.20000	0.49140	0.40083	0.55440	4.04042	0.34649	0.04567		0.46010	0.07650	0.19986	0.02260		0.01694	0.01694	0.09081	0.10396	0.14202
						0.05010	0.08274	0.01310	0.16022	0.05010	0.24066		0.11344	0.15863		0.24074	0.31255	1.31963	1.94365	0.16745	0.40851	4.14543	0.78403	0.07088		0.56876	0.05475	0.17685	0.05114		0.00000	0.03585	0.10919	0.14659	9.658707e-9
						0.06714	0.01850	0.05475	0.17400	0.16376	0.05475		0.10247	0.14132		0.12235	0.23800	1.28030	1.63332	0.34906	0.63246	4.06414	0.72111	0.05562		0.58779	0.11244	0.20270	0.03566		0.12598	0.11174	0.09081	0.09631	0.15442
						0.03662	0.04838	0.08844	0.22345	0.16619	0.14363		0.10526	0.10674		0.17592	0.17532	2.37384	1.52315	0.14347	0.32773	2.98878	0.55440	0.09480		0.60784	0.09583	0.26406	0.01477		0.09239	0.12640	0.10919	0.10964	0.20000
						0.03421	0.03160	0.06714	0.17310	0.25314	0.15800		0.10247	0.14994		0.19192	0.14128	1.72699	1.23052	0.28294	0.23174	2.60936	0.61131	0.03658		0.18240	0.05923	0.22787	0.04844		0.19027	0.19986	0.20000	2.011519e-8	0.10919
						0.05475	0.07066	0.05340	0.38443	0.07066	0.08480		0.07734	0.01746		0.03160	0.14985	2.34094	0.84853	0.19917	0.20000	2.92492	0.52271	0.15800		0.21709	0.09993	0.18426	0.03585		0.11400	0.18942	0.36824	8.092071e-17	0.10919
						0.03662	0.03421	0.06585	0.48347	0.06585	0.15809		0.08986	0.03610		0.16204	0.15345	2.82117	0.11706	0.28128	0.37487	2.43311	0.56569	0.15800		0.20515	0.08259	0.09659	0.05131		0.11533	0.20281	2.655675e-8	0.10140	0.28284
						0.01310	0.08938	0.07085	0.46657	0.08259	0.10870		0.11662	0.03160		0.15643	0.09585	1.80380	0.11706	0.23105	0.20694	2.72441	0.20000	0.19064		0.19611	0.04470	0.09993	0.04580		0.06533	0.18965	4.373103e-10	0.09879	1.102069e-8
						0.03160	0.09908	0.03421	0.20973	0.23005	0.12514		0.25320	0.01746		0.30989	0.20212	1.71353	0.63246	0.42495	0.47140	3.72244	1.05186	0.18044		0.25280	0.08065	0.15800	0.11354		0.09211	0.19023	0.10919	0.10964	0.21965
						0.01850	0.09993	0.05923	0.23539	0.55889	0.09993		0.03160	0.06320		0.23433	0.23003	2.16405	0.23174	1.07361	4.37980	3.68294	1.11624	0.17185		0.59892	0.08065	0.31647	0.04488		0.15737	0.01673	4.373112e-10	0.10964	0.21965
						0.05474	0.11405	0.08938	0.04470	0.53906	0.07741		0.04469	0.06476		0.24066	0.10986	0.00000	0.28294	1.05118	3.49204	3.08942	1.47403	0.29825		0.44501	0.06322	0.42981	0.09295		0.12137	0.02377	0.21965	0.10140	0.30466
						0.02267	0.06976	0.12505	0.06320	0.49837	0.04838		0.06320	0.02247		0.18247	0.40460	0.10367	0.28284	1.41327	3.49204	2.94436	0.70752	0.43631		0.35734	0.04838	0.39453	0.07066		0.09884	0.04467	0.10919	0.21743	0.22787
						0.01850	0.10174	0.15800	0.06320	0.63985	0.01850		0.06707	0.09585		0.15800	0.56528	0.21651	0.40000	1.75196	2.38077	2.40832	1.07433	0.43867		0.25701	0.12973	0.36396	0.07969		0.17554	0.02942	0.09081	0.20000	0.41126
						0.02267	0.05339	0.12640	0.07066	0.68283	0.03662		0.14386	0.13442		0.08000	0.73920	0.00000	0.40013	4.80347	0.19510	2.68422	0.63246	0.19638		0.24582	0.11394	0.32226	0.15891		0.02236	0.05731	0.09081	0.10355	0.31063
						0.04659	0.02271	0.16113	0.04470	0.44240	0.07630		0.12719	0.22034		0.08000	0.78496	0.29484	0.11706	4.43001	0.42248	2.43311	0.23174	0.15347		0.27269	0.22197	0.24383	0.28615		0.03583	0.07784	0.14202	0.10355	0.21965
						0.03421	6.988995e-5	0.17685	0.04838	0.53989	0.10870		0.03610	0.17602		1.052491e-17	0.83868	0.36855	0.23174	3.37901	0.28284	1.60428	1.08925	0.12249		0.09036	0.11179	0.09570	0.15868		0.05602	0.07791	0.20000	6.255871e-10	0.30919
						0.02266	0.03160	0.26655	0.05178	0.60024	0.16167		0.05207	0.32468		0.09480	0.55796	0.36086	0.08294	3.46960	0.80852	1.88476	0.51706	0.03658		0.06639	0.24789	0.40069	0.12725		0.03585	0.09253	0.21965	0.13845	0.14202
						0.04135	0.09583	0.09583	0.02267	0.45745	0.08170		0.03610	0.48033		0.07066	0.61620	1.00000	0.40851	2.70448	1.21655	1.85657	0.56569	0.06242		0.06714	0.21748	0.43829	0.29942		0.04854	0.07066	0.12842	0.09880	0.15442
						0.03206	0.06573	0.06320	0.05178	0.53700	0.09480		0.02247	0.26813		0.07066	0.65934	0.90007	0.21651	1.84418	2.65092	1.05409	0.72184	0.18466		0.13534	0.22378	0.19228	0.12725		0.06543	0.02073	0.14202	0.13401	0.20000
						0.04503	0.03160	0.06320	0.03421	0.53813	0.02616		0.11360	0.11948		0.03610	0.75659	0.20000	0.56569	1.26491	2.81651	5.77985	0.72111	0.35551		0.16575	0.14773	0.31627	0.02396		0.04926	0.02240	0.50919	0.09690	0.20000
						0.01311	0.03421	0.05340	0.03160	0.75618	0.20521		0.06476	0.11344		0.06557	0.91605	0.20000	1.00050	3.00115	3.90322	5.36475	1.49636	0.45802		0.15800	0.15800	0.36746	0.07786		0.04854	0.02240	0.51723	0.20000	0.12842
						0.04469	0.07051	0.07066	0.02267	0.50394	0.21709		0.06320	0.15410		0.18132	0.88545	0.79604	1.06751	2.97026	4.60563	5.09902	1.39792	0.35289		0.22355	0.14773	0.19222	0.13540		0.07066	0.02240	0.60985	0.09690	0.36824
						0.05923	0.06320	0.01850	0.02267	0.67368	0.08259		0.03610	0.38937		0.13407	0.72954	0.90751	1.78885	3.09714	3.83692	5.24614	0.79146	0.45877		0.15901	0.06585	0.17315	0.08403		0.02079	0.01466	0.69081	0.20000	0.28279
						0.03420	0.08051	0.05923	0.04838	0.54405	0.15800		0.04906	0.27432		0.13823	0.96597	0.62796	1.44222	3.08405	4.78629	4.61683	2.05901	0.42919		0.13534	0.11244	0.36849	0.06543		0.04476	0.01466	0.40000	0.13845	0.30454
						0.01310	0.12169	0.03160	0.04469	0.44769	0.24348		0.04469	0.21332		0.20234	0.91694	0.91467	2.03508	3.03862	4.26147	3.93954	1.32009	0.21141		0.18066	0.15315	0.31282	0.04469		0.03594	0.02240	0.09081	0.10314	0.21961
						0.06320	0.22391	0.07649	0.05178	0.21709	0.12708		0.05560	0.08986		0.13632	0.85130	0.87543	1.45602	1.67799	5.33082	3.09429	6.31770	0.14143		0.16669	0.11179	0.08274	0.02240		0.01444	0.01694	0.09081	0.10140	0.25005
						0.06585	0.42597	0.11422	0.15331	0.08938	0.03662		0.04469	0.11948		0.03160	0.94272	0.11729	0.82462	1.29353	5.60861	2.37612	7.25506	0.22342		0.03662	0.15854	0.27183	0.12838		0.04450	0.02396	8.746013e-10	0.10314	0.15142
						0.08409	0.38316	0.10732	0.14649	0.19480	0.15800		0.05105	0.04906		0.14386	0.91376	0.37461	0.55902	1.07703	7.44567	1.28562	7.42042	0.24128		0.21273	0.09993	0.20645	0.03585		0.05064	0.03585	0.29081	0.14478	0.82423
						0.02266	0.33124	0.10351	0.08759	0.21273	0.12708		0.06469	0.06557		0.09159	0.68189	0.21610	1.05409	0.20000	6.67093	2.11845	7.98139	0.16651		0.10722	0.10329	0.31758	0.17017		0.03452	0.05141	0.32225	0.14478	0.82423
						0.04470	0.23414	0.09313	0.09570	0.10329	0.02267		0.04896	0.04896		0.05207	0.61356	0.93498	2.62854	0.40000	6.79412	2.31055	8.56671	0.22772		0.05130	0.11897	0.39576	0.05792		0.04428	0.00000	0.09081	0.10140	0.82423
						0.14132	0.14315	0.12640	0.04838	0.30028	0.21815		0.06557	0.05207		0.06557	0.68606	1.93783	1.93305	0.23174	7.49667	2.30674	7.69562	0.18426		0.03729	0.11244	0.49391	0.08403		0.03603	0.04853	0.09081	2.938702e-8	0.54596
						0.08065	0.09480	0.04500	0.09583	0.21077	0.19228		0.08000	0.02247		0.08662	0.59957	2.45507	1.27820	1.09590	8.09197	2.27846	6.07096	0.24657		0.11244	0.08274	0.46988	0.05602		0.04764	0.02240	0.21965	0.10140	3.762033e-8
						0.17179	0.20810	0.05188	0.06454	0.12388	0.35119		0.04788	0.02469		0.01746	0.56888	2.11869	0.84853	2.05084	7.94912	2.02015	5.93131	0.14727		0.15800	0.09570	0.57254	0.10650		0.02262	0.02240	0.12842	0.10160	3.019533e-8
						0.09481	0.25430	0.15303	0.05178	0.10870	0.49056		0.23545	0.01746		0.03160	0.37960	1.80380	1.57276	3.96079	6.86562	1.45602	4.14846	0.02241		0.16634	0.01850	0.39770	0.12753		0.03153	0.02240	0.14202	0.10160	1.191178e-8
						0.16634	0.25798	0.05010	0.03662	0.09480	0.29978		0.20618	0.05207		0.07802	0.34789	3.02962	0.67311	5.27221	8.13671	0.71162	4.39268	0.06707		0.06958	0.04469	0.46552	0.07066		0.02191	0.02240	0.10919	0.69227	0.20044
						0.05475	0.22164	0.03661	0.05923	0.18960	0.15800		0.13555	0.07863		0.11175	0.19040	2.33238	0.66900	6.82341	5.48550	1.44729	5.20487	0.06476		0.05667	0.06320	0.44058	0.04853		0.05008	0.01466	0.10919	0.72256	0.28284
						0.05187	0.16575	0.05010	0.11405	0.29779	0.03421		0.16204	0.07066		0.10046	0.22657	1.78669	0.27341	7.15318	4.78036	1.21655	5.92516	0.04574		0.05501	0.14363	0.41928	0.07066		0.01940	0.04854	0.20000	0.80840	0.28284
						0.02270	0.08938	0.07085	0.24814	0.18347	0.22680		0.15858	0.15803		0.01746	0.28615	3.61556	0.71908	7.74993	2.77884	1.53019	5.87323	0.03163		0.06677	0.25539	0.27856	0.13407		0.03884	0.03585	0.21965	0.72256	0.28284
						0.07066	0.17930	0.23005	0.26999	0.25796	0.39595		0.16504	0.12719		0.05560	0.26058	4.28121	0.68091	6.79117	1.82771	1.40000	8.06226	0.18995		0.04719	0.18426	0.30448	0.04469		0.02235	0.02240	0.22787	0.80840	0.35294
						0.12515	0.15800	0.24336	0.22378	0.29930	0.27487		0.17228	0.13442		0.08066	0.29811	3.56090	0.27948	7.29470	0.67862	1.07703	8.20933	0.14693		0.09712	0.29009	0.21404	0.04926		0.03419	0.03160	0.15442	0.39716	0.30466
						0.04469	0.20892	0.05010	0.22787	0.26406	0.08938		0.17017	0.16770		0.04574	0.42981	3.61971	0.38316	7.74774	0.72111	0.48995	7.88027	0.10200		0.14464	0.07851	0.20687	0.01484		0.02116	0.03483	0.15442	0.10350	0.20000
						0.01857	0.19222	0.06320	0.16619	0.36987	0.12505		0.15800	0.15800		0.06476	0.02000	4.95536	0.25000	7.66551	1.45774	0.52271	8.29234	0.08659		0.11131	0.10790	0.26813	0.03386		0.03160	0.03482	0.15442	2.219541e-9	0.20000
						0.16421	0.17829	0.06454	0.09313	0.13029	0.09993		0.13632	0.06320		0.06557	0.10307	1.47156	0.40672	7.91706	1.56436	0.63246	9.16211	0.11387		0.18007	0.06842	0.05178	0.04626		0.04469	0.02395	0.21965	0.10375	0.29081
						0.03662	0.08844	0.03421	0.06585	0.07066	0.12973		0.14693	0.04906		0.04469	0.57559	1.00536	2.22027	8.21421	0.33333	0.80852	8.41190	0.04755		0.18862	0.13407	0.08374	0.03386		0.03587	0.01690	0.21965	0.15120	0.21965
						0.08258	0.10722	0.13579	0.08376	0.02616	0.26128		0.02247	0.04788		0.03177	1.00336	0.80000	3.04188	9.05539	0.35355	0.88294	8.28010	0.05835		0.07742	0.40600	0.08170	0.02932		0.04471	0.02396	0.15442	0.15120	0.32225
						0.11179	0.12505	0.05474	0.09659	0.01310	0.41563		0.02469	0.11360		0.02247	1.54104	1.38321	2.44131	8.37696	0.23174	0.75000	8.36142	0.08007		0.10722	0.36094	0.08259	0.06705		0.05792	0.01466	0.22787	0.15120	0.12842
						0.13005	0.05926	0.05923	0.09570	0.14773	0.54902		0.02469	0.15863		0.07066	1.41040	0.95972	2.37612	8.73278	0.14347	0.74536	6.01973	0.03457		0.08759	0.22077	0.09570	0.06488		0.06488	0.01467	0.14202	0.22742	0.21965
						0.03160	0.08065	0.04469	0.04470	0.09128	0.58761		0.02469	0.22345		0.07220	2.17879	0.90531	1.68496	7.80945	0.30620	1.19510	5.26573	0.04480		0.19222	0.42981	0.03160	0.04469		0.04626	0.01694	0.12842	0.22005	0.14202
						0.01849	0.04470	0.02616	0.03421	0.14132	0.67553		0.03610	0.20449		0.03462	2.00131	1.00050	1.72047	7.60000	0.30620	0.35355	4.89331	0.11419		0.26152	0.32859	0.03421	0.07066		0.04923	0.03582	0.28284	0.22005	0.14202
						0.14607	0.12638	0.01310	0.01850	0.05178	0.61675		0.02247	0.27006		0.03462	2.07817	1.07703	0.28284	6.11246	0.00000	0.37487	5.22267	0.09576		0.35734	0.21273	0.02262	0.06320		0.05600	0.01465	0.20000	0.22005	0.12842
						0.19986	0.11240	0.01853	0.03662	0.07066	0.26778		0.03462	0.17592		0.03160	1.93699	1.24118	1.20004	5.61272	0.44721	1.20000	4.39157	0.03612		0.48132	0.28264	0.06552	0.07969		0.08191	0.03585	0.15442	0.22005	0.20000
						0.14101	0.11180	0.01310	0.01310	0.17930	0.18825		0.03462	0.23262		0.02469	1.67886	0.44721	1.13483	5.47616	0.32773	1.01980	4.87032	0.07794		0.52981	0.29134	0.05922	0.10028		0.05602	0.01692	0.15442	0.10675	0.20000
						0.14132	0.08065	0.04838	0.01850	0.06714	0.18747		0.01414	0.15410		0.03462	1.26688	0.33798	2.00876	5.61444	0.34649	1.16119	3.83286	0.15587		0.48155	0.44728	2.263697e-5	0.04469		0.07832	0.05137	2.139492e-8	3.153987e-9	0.20000
						0.17936	0.04464	0.01850	0.01310	0.12708	0.27664		0.07734	0.21198		0.05835	1.01721	0.21651	3.52691	4.23792	0.14347	0.67862	2.64723	0.09579		0.52971	0.51441	0.03161	0.03585		0.09630	0.03160	0.14202	2.578236e-8	0.35294
						0.16113	0.07067	0.01850	0.04838	0.08759	0.25314		0.07928	0.09639		0.03160	0.60123	0.20000	4.56508	4.33329	0.16555	0.28294	2.33238	0.04472		0.40405	0.73528	0.04474	0.01466		0.04968	0.03585	0.09081	0.10382	0.42446
						0.09583	0.03142	0.03421	0.17546	0.10722	0.40594		0.08252	0.07929		0.02247	0.39639	0.57772	3.84187	3.66741	0.08294	0.40000	2.32589	0.14448		0.23580	0.75051	0.14291	0.07066		0.06320	0.05792	0.14202	0.10382	0.32791
						0.03662	0.08065	0.03160	0.11897	0.07066	0.68708		0.09480	0.15713		1.315614e-17	0.37316	0.51042	4.87213	1.08954	0.21651	0.40851	2.60768	0.04471		0.27588	0.86771	0.15756	0.03483		0.04852	0.04853	0.12842	0.29628	0.31063
						0.08170	0.11397	0.08759	0.14132	0.11897	0.64960		0.11225	0.11344		1.096345e-17	0.19222	1.13743	4.19791	0.66269	0.20000	0.08294	2.39370	0.10047		0.25477	0.83410	0.14063	0.03160		0.03581	0.03483	0.09081	0.10382	0.41464
						0.04838	0.14640	0.01850	0.09480	0.13031	0.59810		0.03462	0.18426		0.03610	0.17303	1.87279	5.07208	0.55440	0.20000	0.14347	1.34385	0.10261		0.20313	0.83385	0.19509	0.02073		0.10541	0.19587	0.09081	0.10382	0.40000
						0.17698	0.15315	0.04469	0.14773	0.05340	0.52595		0.05835	0.22588		8.770708e-19	0.24680	2.45507	5.62105	0.62708	0.16555	1.03926	1.21699	0.09789		0.51209	0.67239	0.19621	0.17553		0.11440	0.22352	0.12842	0.09623	0.40000
						0.16939	0.13408	0.04659	0.35254	0.03160	0.60074		0.12235	0.19175		0.03160	0.59138	3.05941	5.74439	0.51042	0.20000	0.52271	0.57772	0.07872		0.25477	0.52730	0.08074	0.05602		0.11054	0.21208	0.09081	0.09623	0.40000
						0.10104	0.18230	0.01850	0.33570	0.01310	0.54259		0.05835	0.07066		0.06476	0.80486	2.60807	5.50273	0.93498	0.33798	0.28284	1.18652	0.08193		0.26058	0.33599	0.08074	0.06488		0.06523	0.20026	0.09081	2.065109e-8	0.41018
						0.10356	0.13599	0.02616	0.29442	0.03421	0.44523		0.03462	0.03610		0.03160	1.09346	3.48392	5.11593	1.41631	0.42495	0.65372	0.33798	0.04469		0.29918	0.15854	0.05911	0.07923		2.131192e-4	0.19257	0.09081	4.144406e-8	0.21965
						0.18967	0.14595	0.03421	0.26128	0.03421	0.37455		0.09639	0.04788		0.06557	1.18074	2.31706	2.91204	0.73923	0.40000	0.51042	0.21651	0.13442		0.21709	0.08759	0.02529	0.05792		0.03502	0.08537	0.12842	1.511941e-8	0.35294
						0.07741	0.08846	0.01850	0.05475	0.07742	0.28440		0.11175	0.17214		0.08000	1.10600	2.20311	3.32911	0.51042	0.44721	1.20660	1.21699	0.12759		0.03160	0.17930	0.07719	0.22169		0.08616	0.09031	3.052832e-8	0.09623	0.27456
						0.23005	0.12170	0.04838	0.06454	0.06320	0.12775		0.06707	0.18426		0.02247	1.04729	1.80000	3.92938	0.53015	0.23174	0.37636	1.06070	0.14883		0.28696	0.15331	0.05175	0.03585		0.16551	0.03475	0.09081	0.09674	0.50776
						0.06322	0.20748	0.25324	0.08065	0.03661	0.03160		0.11394	0.32020		0.01414	1.00621	3.08294	2.61535	0.40851	0.11706	0.14431	2.97281	0.15610		0.30614	0.12775	0.03160	0.01466		0.11994	0.01695	0.12842	0.09674	0.15135
						0.09908	0.22837	0.08170	0.05923	0.09480	1.688372e-16		0.14886	0.47568		0.03610	0.81008	1.95835	2.99188	0.08294	0.14347	1.30116	2.24398	0.17626		0.22835	0.20313	0.07628	0.02239		0.49526	0.03162	0.14202	0.21842	0.25000
						0.10329	0.27313	0.08274	0.09659	0.01850	1.719069e-16		0.05207	0.48846		0.03160	0.64605	2.61535	2.92391	1.00000	0.21651	0.23902	1.61692	0.15690		0.38934	0.16062	0.03160	0.04475		0.45330	0.01696	0.14202	0.19786	0.20000
						0.13029	0.05178	0.05340	0.09659	0.03160	0.03160		0.09440	0.44652		0.07066	0.59198	1.69478	1.53594	1.54099	1.43507	0.63292	1.72047	0.11640		0.35060	0.06320	0.03421	0.06727		0.08005	0.07079	0.14202	0.39818	0.21965
						0.12776	0.02930	0.06585	0.07085	0.14607	0.05475		0.03767	0.34585		0.08986	0.33591	1.62304	1.44222	0.96932	1.34376	0.42272	2.23607	0.07496		0.31738	0.07630	0.03160	0.03589		0.08524	0.07769	2.736003e-8	0.22174	0.21965
						0.03661	0.09573	0.20645	0.01850	0.22159	0.05475		0.02247	0.10674		0.07929	0.21368	0.74536	1.34385	0.71162	1.53020	0.77065	1.01980	0.04566		0.19442	0.12775	0.03421	0.03174		0.04402	0.08413	0.21965	0.32299	0.20000
						0.15797	0.14649	0.07630	0.05178	0.05475	0.01310		0.03767	0.19504		0.09585	0.15407	0.74536	1.23052	1.20286	1.31967	0.79281	1.20000	0.07665		0.29134	0.09569	0.01310	0.02091		0.41197	0.07046	0.41464	0.42253	0.22787
						0.07064	0.13029	0.06585	0.01312	0.12708	9.203869e-17		0.04469	0.12760		0.10674	0.14994	0.94119	0.95255	0.41678	1.20286	1.07322	1.00000	0.03160		0.09570	0.19611	0.01853	0.04918		0.42887	0.06309	0.41018	0.40069	0.31063
						0.05172	0.06454	0.02267	0.01854	0.08274	0.03421		0.03610	0.06476		0.22472	0.13823	0.72111	1.31133	0.48995	0.31690	0.32888	0.79146	0.09480		0.16111	0.21659	0.07085	0.03530		0.10228	1.801808e-5	0.12842	0.31029	0.35294
						0.06448	0.06454	0.07851	0.12388	0.09480	0.08844		0.07802	0.21913		0.14693	0.24805	0.44721	0.47156	0.61131	0.40825	0.95449	0.14347	0.12249		0.19228	0.21198	0.02270	0.08155		0.09585	0.03482	0.28284	0.41617	0.28284
						0.11389	0.06322	0.12654	0.02267	0.07741	0.07742		0.06707	0.17602		0.18426	0.36174	0.84853	5.71286	0.72656	0.33797	0.28284	1.64924	0.04705		0.02267	0.16113	0.06454	0.05792		0.09630	0.02242	0.21965	0.31029	0.28284
						0.34470	0.06322	0.06585	0.03421	0.07066	0.05923		0.07067	0.06937		0.11662	0.18960	1.07703	8.33941	0.40000	0.48995	0.56502	0.53015	0.00000		0.08170	0.12775	0.04658	0.06564		0.08014	0.03488	0.12842	0.22958	0.41126
						0.09570	0.05178	0.12775	0.03160	0.04838	0.08065		0.03159	0.09988		0.10526	0.15410	0.77021	8.19327	0.53015	0.84853	0.08294	0.93814	0.03160		0.25348	0.15808	0.05345	0.05776		0.04854	0.09913	0.20000	0.13512	0.52999
						0.15808	0.04470	0.17400	0.03658	0.04469	0.09480		0.06557	0.11662		0.18426	0.07066	0.79206	5.86823	0.32773	0.29483	1.04448	1.81108	0.03160		0.26406	0.51767	0.09480	0.05790		0.04853	0.03482	2.341955e-8	0.22958	0.43726
						0.22491	0.05340	0.10481	0.07742	0.02616	0.05923		0.13029	0.05835		0.38319	0.01746	0.69290	7.00002	0.40000	0.21635	0.52268	2.22449	0.03160		0.41783	0.62823	0.03433	0.11305		0.06705	0.02250	0.09081	0.20041	0.50557
						0.23290	0.03662	0.06585	0.03661	0.03421	0.05340		0.11344	0.06557		0.40557	0.22345	1.01980	6.38788	0.80852	0.52282	0.38270	1.98681	0.18960		0.47819	0.93344	0.01850	0.06316		0.14480	0.02064	0.09081	0.22958	0.50557
						0.12180	0.07066	0.07742	0.08064	0.22567	0.05923		0.02466	0.04574		0.53069	0.07801	1.40245	5.83304	1.26800	1.00000	0.13817	2.68328	0.15800		0.72749	1.03846	0.05009	0.04483		0.05602	0.01473	0.14202	0.22958	0.21965
						0.43572	0.04838	0.04838	0.07852	0.15854	0.02267		0.07067	0.03160		0.42936	0.12640	1.63264	6.23312	0.68294	0.72184	4.98996	3.15316	0.22120		0.28230	0.99386	0.21284	0.02237		0.13407	0.08052	0.22787	0.35707	0.35294
						0.23399	0.06585	0.03160	0.12388	0.09480	0.10329		0.01745	0.06557		0.29139	0.06320	2.45128	6.58653	0.92716	1.40397	4.98996	2.97321	0.06320		0.13597	0.76916	0.31275	0.04921		0.08938	0.02245	0.22787	0.21809	0.32225
						0.20852	0.07851	0.16420	0.12973	0.05010	0.03160		0.02247	0.08355		0.08938	0.05105	3.18948	3.51026	0.20000	1.66667	4.98996	2.33238	0.18960		0.87347	0.68673	0.38616	0.05154		0.01466	0.01465	0.28284	0.28284	0.30466
						0.17930	0.03160	0.06714	0.20880	0.08259	0.03421		0.01414	0.02469		0.12122	0.08662	1.78369	1.61245	0.86054	1.33333	0.96286	2.13704	0.12640		1.26780	0.27098	0.24680	0.05073		0.11394	1.352860e-4	0.21965	0.13208	0.30919
						0.15854	0.07066	0.08274	0.19986	0.07630	0.02267		0.03085	0.08189		0.08789	0.03160	1.61245	3.01023	0.92081	1.27475	0.72215	3.11582	0.12640		1.52487	0.54367	0.20114	0.09247		0.12183	1.352860e-4	0.09081	0.21980	0.10919
						0.19133	0.02616	0.15808	0.19449	0.20355	0.20438		0.02909	0.05835		0.08938	2.850498e-17	1.43545	3.92057	0.58941	1.33216	0.93862	3.40000	0.12640		1.45390	0.40513	0.12708	0.09249		0.03585	0.02071	0.10919	4.078787e-8	0.20000
						0.08259	0.03160	0.16420	0.14012	0.14549	0.45309			0.08549		0.10247	0.03160	0.93814	1.60276	0.72111	1.12577	0.60000	3.56090	0.12640		1.35418	0.13534	0.08170	0.05591		0.16113	0.04867	0.09081	0.10354	0.20000
						0.04838	0.03160	0.06585	0.15164	0.13029	0.34542			0.13036		0.30222	0.06476	0.23174	0.79206	1.05279	0.69290	1.06751	3.25773	0.00000		0.89606	0.08259	0.21748	0.08011		0.11044	3.662827e-17	0.14202	0.14792	0.22787
						0.14132	0.05178	0.05010	0.06320	0.08376	0.44501			0.20945		0.29888	0.08252	0.32773	4.52172	0.88404	0.11706	0.72111	2.98567	0.00000		1.10244	0.08759	0.08759	0.03525		0.14434	0.02072	0.10919	0.10576	0.22787
						0.04659	0.03662	0.10791	7.969457e-17	0.08376	0.59371			0.25477		0.09480	0.05560	0.79146	6.93397	1.00000	0.55440	0.55972	2.04584	0.03160		0.74685	0.37093	0.30169	0.04732		0.03483	0.02069	0.12842	7.747077e-9	0.28483
						0.04470	0.04838	0.03662	0.04470	0.03662	0.64204			0.25320		0.10526	0.11033	1.26800	7.93977	1.01980	1.24118	0.46859	2.03961	0.00000		0.52971	0.47815	0.39736	0.07198		0.26004	4.026295e-5	0.22787	0.10576	0.25737
						0.02267	0.02616	0.04469	0.06454	0.09659	0.55187			0.25881		0.04896	0.34789	1.16119	7.09661	0.52367	1.01980	0.74536	1.49636	0.00000		0.05475	0.06322	0.70796	0.04799		0.04469	0.03601	0.31063	0.10977	0.61373
						0.06585	0.05923	0.02621	0.05923	0.06320	0.85961			0.17553		0.26182	0.50587	1.60000	6.01973	0.28968	1.56205	1.32537	2.14616	0.00000		0.24177	0.20491	0.93855	0.05755		0.11394	0.04464	0.31063	5.049572e-24	0.46030
						0.04469	0.01310	0.08480	0.24582	0.06454	1.04577			0.11391		0.07448	0.65707	1.32741	4.69822	0.47156	3.39584	1.32537	2.64447	0.00000		0.69304	0.18434	0.91643	0.09864		0.17875	0.05139	0.36824	0.10576	0.49454
						0.08274	0.02267	0.16619	0.24680	0.02616	0.96787			0.25367			0.66757	1.00050	4.45773	0.38623	3.56899	3.20358	2.11869	0.00000		0.31915	0.23976	0.80818	0.06915		0.06967	0.02231	0.28284	0.10576	0.28284
						0.09659	0.01854	0.14649	0.26813	0.03662	1.13148			0.41582			0.65767	0.49001	3.38593	0.27064	3.42345	2.43921	2.60132	0.03160		0.52969	0.17310	1.03579	0.08347		0.15666	4.026295e-5	0.35294	0.10576	0.36824
						0.06316	0.01850	0.05010	0.19133	0.06454	1.22052			0.33628			0.32534	1.21095	3.21893	0.08294	3.27936	1.96977	2.65811	0.00000		0.61378	0.19986	1.07669	0.04860		0.03160	0.01462	0.32791	0.10576	0.30466
						1.294522e-4	0.07741	0.11897	0.20234	0.03421	0.95990			0.23137			0.40783	1.45774	3.03684	0.29492	2.94635	1.65517	2.53221	0.00000		0.79970	0.17090	0.92925	0.05792		0.03483	0.01692	0.49454	0.21942	0.28284
						0.11765	4.723200e-17	0.04470	0.01310	0.03662	0.93032			0.16113			0.20234	1.98577	1.75464	0.14313	1.72099	1.03926	2.22335	0.03160		0.79252	0.26877	0.89025	0.03160		0.09593	0.04464	0.32791	0.22774	0.15442
						0.12184	0.05474	0.22120	0.05010	0.03662	0.90894			0.17594			0.21357	1.20185	1.31598	0.08288	0.70720	1.12577	1.67705	0.03160		1.06880	0.15800	1.23862	0.03160		0.04469	1.180935e-4	0.32791	0.22774	0.22787
						0.12979	0.04469	0.23960	0.07851	0.06320	0.49565			0.14131			0.25340	1.06066	1.12577	0.69295	0.74429	0.89443	1.28062	0.00000		1.02577	0.25701	0.92011	0.03160		0.02073	0.02240	0.30466	0.28284	0.14202
						0.13405	0.03421	0.25477	0.02616	0.03160	0.39791			0.21434			0.40905	0.77021	1.02320	0.93814	0.72184	0.93447	0.14347	0.04469		1.19275	0.19228	0.54539	0.03160		0.02073	0.04863	0.14202	0.28284	0.15442
						0.11762	0.08938	0.09673	0.03662	0.03662	0.46198			0.20176			0.15549	0.55972	0.14633	0.72096	1.49632	0.56569	0.79206	0.02469		0.99521	0.21438	0.58155	0.04626		0.03278	0.02396	0.14202	0.09504	0.10919
						0.07066	0.20270	0.19444	0.02267	0.15800	0.43964			0.09480			0.31726	0.14347	0.19510	0.68226	1.60215	0.79146	0.72111	0.01746		0.68904	0.18240	0.51828	0.06320		0.01466	0.07064	0.14202	1.633760e-8	0.14202
						0.06320	0.33436	0.12388	0.01310	0.06454	0.38249			0.21625			0.23866	0.44721	0.74536	0.84758	1.01778	0.63246	0.28284	0.05835		0.42981	0.05340	0.28680	0.04854		0.02073	0.09996	0.09081	0.13425	1.749205e-9
						0.09570	0.19050	0.12505	0.01850	0.15908	0.48339			0.21205			0.12760	0.37487	0.98004	1.14296	1.10119	0.14347	0.40851	0.08938		1.12538	0.11762	0.31835	0.08014		0.01694	0.07965	0.28284	0.09504	0.14202
						0.06320	0.08205	0.12775	0.03421	0.10870	0.39230			0.09912			0.03462	0.60570	1.13483	1.34164	1.18574	0.33798	0.34649	0.09639		1.27384	0.20355	0.37827	0.15891		0.02396	0.05057	0.50557	0.09216	0.20000
						0.04659	0.15862	0.07085	0.02616	0.05340	0.56968			0.03610			0.02469	0.55440	0.93498	1.13485	1.13472	1.07703	0.82462	0.16113		1.40327	0.20355	0.30370	0.02073		0.03483	0.09479	0.32225	0.13425	1.782361e-8
						0.01310	0.08058	0.06321	0.01310	0.05009	0.53752			0.23397			0.03160	0.52367	0.60653	0.69290	2.00876	0.21651	1.00000	0.13632		1.02479	0.22345	0.26128	0.02073		0.01694	0.06320	0.35294	7.166514e-9	0.20000
						0.04470	0.22680	1.910341e-6	0.03160	0.02267	0.46552			0.30582			0.01746	0.72111	0.72111	0.92080	1.72668	0.30620	0.71162	0.09159		1.24249	0.30713	0.11680	0.02073		0.02240	0.05053	0.28284	0.22440	0.22787
						0.01310	0.13750	0.08938	0.01310	0.02616	0.41216			0.29064			0.08252	0.90907	1.09590	1.20000	1.10303	0.92081	0.58941	0.09480		1.19955	0.12775	0.25314	0.02240		0.00000	0.08016	0.20000	0.35884	0.14202
						0.03421	0.26343	0.09993	0.01310	0.03160	0.42508			0.28163			0.32221	0.55902	1.18652	2.09252	1.32285	0.37487	0.60571	0.08662		1.01907	0.06714	0.22787	0.20706		0.03483	2.443340e-3	0.10919	0.22798	0.22722
						0.05010	0.19034	0.11480	0.08759	0.04469	0.08259			0.39595			0.49199	0.87119	2.20488	2.28294	0.68508	0.40000	1.42830	0.05560		1.03511	0.08376	0.24198	0.03483		0.01466	0.04680	1.677632e-8	0.22798	0.14204
						0.08938	0.25234	0.13029	0.11394	0.03421	0.05010			0.69304			0.59343	2.51717	1.78176	2.81009	0.98640	0.40851	0.60000	0.04788		1.05602	0.18240	0.37073	0.03160		0.03483	0.03380	0.21965	0.22798	0.11274
						0.05923	0.15697	0.02267	0.10722	0.03421	0.14132			0.97059			0.82705	2.30489	1.97990	1.49636	0.61125	1.45602	1.45602	0.02247		1.03376	0.08759	0.43964	0.02396		0.21333	0.02123	1.688847e-8	0.28284	0.15032
						0.04469	0.10022	0.06227	0.14830	0.03662	0.13968			0.84162			0.91640	1.96977	1.93203	1.00000	2.21029	3.60190	1.70880	0.03462		1.00385	0.20880	0.25477	0.02396		0.23559	0.01404	0.20000	0.10479	0.54651
						0.05475	0.03452	0.09583	0.14132	0.03421	0.07630			0.83629			0.73703	2.34094	2.18913	0.44839	2.78440	1.98703	1.44222	0.03462		1.02378	0.35330	0.08759	0.03483		0.22345	0.02076	0.22787	0.10479	0.40988
						0.04469	0.13119	0.07066	0.03421	0.03160	0.07630			0.78541			0.64800	2.15407	1.14342	0.30620	2.76382	1.29843	0.90907	0.06476		0.96787	0.24814	0.13029	0.02240		0.15642	0.03252	0.15442	0.15223	0.41464
						0.17017	0.10943	0.09313	0.07851	0.22120	0.21077			0.53428			0.61807	1.28827	1.88680	0.67862	2.61508	2.55764	1.13137	0.05105		0.97469	0.18960	0.09993	0.01694		0.14332	0.03205	0.20000	0.10479	0.71903
						0.00000	0.08288	0.19222	0.06320	0.33783	0.30084			0.03160			0.58249	1.45339	2.34637	0.40851	2.71478	1.71906	0.48995	0.04469		0.83426	0.15800	0.09313	0.02073		0.04859	0.03578	0.12842	0.09489	0.09081
						0.03662	0.08305	0.34041	0.08170	0.29590	0.02267			0.03462			0.81827	0.80429	1.63946	0.52367	0.74273	1.13483	0.92716	0.04574		0.81604	0.38680	0.06320	0.02073		0.08615	0.07036	0.10919	0.09489	0.10919
						0.09908	0.19142	0.15808	0.05340	0.17400	0.03662			0.04469			1.06173	0.63246	1.49928	0.58941	0.57126	1.28294	0.60000	0.02000		0.71691	0.48011	0.14823	5.262457e-18		0.09593	0.07996	0.09081	0.13057	0.20000
						0.13407	0.14591	0.28470	0.03662	0.06585	0.11680			0.05207			0.81243	0.23174	2.83927	0.49692	0.79604	1.42830	1.21697	0.01414		0.67593	0.63442	0.21284	0.01466		0.07066	0.04973	0.10919	0.13031	0.20000
						0.07571	0.25977	0.36560	0.06585	0.07741	0.26874			0.03160			0.97356	0.30620	2.88444	0.49001	1.12897	0.84856	0.33798	0.07066		0.64327	0.60372	0.19222	0.01466		0.04926	0.06499	0.10919	0.14289	0.21965
						0.09839	0.05923	0.21438	0.06714	0.12640	0.33534			0.03160			0.94277	0.23174	2.58477	0.74443	0.89797	1.81700	0.43311	0.01746		0.83536	0.42327	0.09570	0.00000		0.06488	0.07064	0.20084	0.14289	0.09081
						0.08765	0.03662	0.06320	2.192690e-18	0.16575	0.08759			0.03462			1.24053	0.20000	2.29081	1.00638	1.21107	1.15445	1.13829	0.07066		0.87980	0.12388	0.21198	0.01694		0.05602	0.05598	2.418897e-8	0.22466	0.10919
						0.06085	0.07980	0.28696	0.01310	0.04659	0.31282			0.03160			1.64072	0.23174	2.27846	0.71706	1.29178	2.16763	1.13104	0.05835		0.92534	0.10948	0.14830	0.00000		0.05792	0.06343	0.21965	0.20000	0.09081
						0.05909	0.03421	0.05178	0.01850	0.04469	0.23222			0.09988			1.54011	0.42248	1.00638	0.92081	1.31377	2.96995	0.99007	0.09272		0.88935	0.12973	0.13534	0.03585		0.03483	0.05094	0.21965	0.13031	0.09081
						0.05930	0.01850	1.218473e-17	0.18240	0.11244	0.25053			0.10247			1.38739	0.36086	1.07703	0.80429	0.40000	2.44131	0.61131	0.03160		0.81380	0.14304	0.19480	0.02240		0.08147	0.04631	0.32225	1.782956e-8	0.09081
						0.04837	0.16113	0.01310	0.23399	0.09993	0.11762			0.15800			1.17279	3.14466	1.42387	0.68294	0.82462	1.90764	0.49692	0.04469		0.55841	0.13029	0.11394	0.03586		0.14207	0.05645	0.30919	2.482596e-8	1.546577e-8
						0.04469	0.17210	0.03662	0.23859	0.13029	0.29446			0.16905			0.89494	3.15456	0.84853	0.53015	2.61721	2.29380	0.23174	0.03160		0.59797	0.06320	0.08259	0.02259		0.10946	0.05181	0.71498	4.806531e-17	0.10919
						0.03160	0.07742	0.03662	0.38680	0.21273	0.20962			0.14693			0.66757	3.50372	0.79206	0.40000	2.01991	2.25995	1.00343	0.02247		0.49666	0.03421	0.10481	0.04653		0.06323	0.03424	0.60985	2.194448e-8	0.09081
						0.05010	0.23643	0.03662	0.35588	0.16619	0.15800			0.05207			0.34720	3.52843	0.65372	0.21651	2.13589	2.84734	1.21655	0.01746		0.43631	0.03662	0.06454	0.03174		0.11394	0.03409	0.82462	0.09572	0.09081
						0.15901	0.24005	0.03160	0.19222	0.24853	0.21077			0.03462			0.19584	2.23607	0.44721	0.28294	2.08622	4.15973	1.11706	0.05560		0.18825	0.01310	0.08065	0.04593		0.06488	0.07942	0.91298	0.13310	7.176234e-9
						0.07066	0.24041	0.01853	0.19222	0.11394	0.25701			0.05835			0.09175	2.78252	0.51042	0.44721	2.10693	2.78568	2.60768	0.03903		0.36633	0.05340	0.08187	0.14614		0.11334	0.05114	0.80000	0.09572	0.09081
						0.04469	0.17401	0.03160	0.12640	0.18426	0.24177			0.15643			0.08355	2.02498	0.44721	0.53015	0.51042	1.89353	2.44131	0.02469		0.18825	0.03662	0.03662	0.07968		0.10206	0.03543	0.14202	0.09572	0.14202
						0.07741	0.08259	0.02616	0.07066	0.13597	0.44058			0.13407			0.03160	1.92063	0.43311	0.23174	0.33798	1.00683	2.38455	0.08986		0.10722	0.05010	0.01850	0.07065		0.07066	0.05600	0.09081	0.09572	0.12842
						0.09908	0.10870	0.06320	0.06320	0.12514	0.53998			0.21368			0.05835	2.32589	0.36086	0.80000	1.41421	0.23174	3.33333	0.04469		0.30028	0.05475	0.03160	0.12267		0.01694	0.09112	0.10919	0.20000	0.09081
						1.508571e-16	0.07741	0.03421	0.10481	0.06320	0.67622			0.22345			0.12122	2.23039	2.44955	0.95972	1.28030	0.44721	2.67025	0.09639		0.15800	0.07066	0.01850	0.07066		0.02396	0.15455	0.35294	0.09029	4.373018e-9
						0.06714	0.09313	0.01310	0.12169	0.11394	0.38984			0.17592			0.06557	2.16401	2.29829	1.79104	1.23290	1.82210	2.50428	0.04574		0.13407	0.09128	0.03662	0.03585		0.01466	0.01450	0.10919	1.316639e-8	4.373018e-9
						0.09583	0.05923	0.02267	0.07851	0.03662	0.25276			0.09993			0.08662	2.51027	1.21697	1.79104	1.61245	1.73966	1.41492	0.03610		0.35707	0.10722	0.05475	0.01466		0.07969	0.04603	0.15442	0.10439	0.15442
						0.08065	0.06322	0.05475	0.04469	0.03662	0.42293			0.17017			0.24345	0.99024	0.65372	2.21544	2.26385	2.55726	1.00000	0.15410		0.48010	0.07851	0.05178	0.13029		0.03585	0.05034	0.20000	0.10972	0.10919
						0.03662	0.10704	0.07085	0.01850	0.03421	0.39923			0.05560			0.23366	0.44721	0.33798	1.97990	1.21093	2.88021	0.80852	4.820033e-9		0.18747	0.12505	0.01853	0.06704		0.02073	0.05041	0.20000	0.10527	1.102070e-8
						0.03662	0.14530	0.05474	0.07630	0.25324	0.06320			0.06557			0.17592	0.71162	0.28284	2.12603	1.00951	1.78860	1.78669	0.05560		0.18747	0.14072	0.02267	0.10548		0.05792	0.06713	0.09081	0.10972	0.10919
						0.06454	0.05178	0.01853	0.29811	0.22567	0.19442			0.06937			0.17592	0.48294	0.56569	1.61245	1.29556	1.62663	1.52315	0.01746		0.11394	0.16420	0.01310	0.11173		0.03483	0.07311	0.20000	0.20000	0.21965
						0.14304	0.03160	0.01310	0.31600	0.13950	0.04469			0.08355			0.34720	0.48995	0.29484	1.98337	1.44222	1.60276	1.20000	0.06476		0.08065	0.13029	0.03160	0.05602		0.03585	0.05242	0.20000	0.22268	0.12842
						0.04470	0.04838	0.01850	0.26813	0.12640	0.23222			0.08986			0.21279	1.21655	1.13137	1.84388	1.58563	1.13137	1.34164	0.08189		0.09908	0.14830	0.04659	0.09630		0.04926	0.03234	0.10919	0.20000	0.22787
						0.07066	0.06292	0.06320	0.26152	0.16575	0.31647			0.31129			0.21649	0.80852	1.34164	2.04836	1.83626	1.76996	1.68496	0.09159		0.11244	0.01850	0.03421	0.09630		0.02396	0.02029	0.22787	0.22846	0.20000
						0.03421	0.17746	1.507066e-16	0.19133	0.09993	0.23853			0.28234			0.29134	1.00050	0.84853	1.70102	2.77849	2.23039	0.86054	0.09159		0.05475	0.11680	0.02616	7.547118e-7		0.05071	0.03579	0.28284	0.21896	0.28483
						2.192690e-18	0.12169	0.03662	0.05340	0.08259	0.24607			0.28622			0.23005	1.41421	1.24866	1.44222	2.85043	2.77040	1.29882	0.03462		0.05923	0.12505	0.08065	0.15457		0.06705	0.05090	0.22787	0.20040	0.15135
						0.08259	0.10722	0.10971	0.12640	0.05923	0.33213			0.25477			0.10307	1.80380	0.72111	0.84853	3.00472	3.43362	0.60000	0.06557		0.06454	0.07741	0.05923	0.03585		0.01466	0.06941	0.10919	0.20040	0.37977
						0.02267	0.20234	0.09313	0.32534	0.02267	0.61432			0.25833			0.25477	2.73231	0.11729	0.89447	3.02624	3.92339	0.89443	0.04574		0.03421	0.04470	0.07630	0.05141		0.03483	0.04530	0.30919	0.09069	0.25000
						0.02616	0.28264	0.18347	0.40468	0.08170	0.65203			0.16770			0.39788	3.19300	0.08294	0.72116	2.78252	1.20185	1.62482	0.03610		0.04470	0.04470	0.08259	0.03585		0.11011	0.40542	0.09081	0.13556	0.20000
						0.04838	0.22345	0.16376	0.43068	0.04469	0.54793			0.09782			0.24680	4.19158	1.11624	0.79192	1.89428	1.10853	0.56569	0.01414		0.05340	0.03421	0.03924	0.01466		0.14654	0.39013	0.10919	0.21713	0.29081
						0.01310	0.17400	0.12388	0.51828	0.07851	0.34767			0.07802			0.32676	0.69463	0.84856	0.44721	1.37646	2.06576	0.80852	0.02247		0.03421	0.02267	0.06227	0.12267		0.19516	0.41790	0.09081	0.20000	0.41464
						0.05231	0.13660	0.04838	0.38182	0.07066	0.15854			0.11980			0.27660	0.40966	1.20286	1.00000	0.77021	4.37300	0.72111	0.03610		0.03662	0.03421	0.08065	0.06543		0.12266	0.47472	0.09081	0.23619	0.22787
						0.05340	0.09477	0.05010	0.22345	0.08376	0.13029			0.08355			0.26997	0.58941	1.60000	0.80000	0.21651	6.29983	1.05186	0.08001		0.04469	0.02267	0.09993	0.05792		0.10027	0.48156	0.32791	0.23619	0.30919
						0.04469	0.13951	0.01310	0.17698	0.13973	0.09993			0.11226			0.24369	0.80852	2.08459	0.28294	0.53015	6.95701	1.61033	0.08355		0.05474	0.03421	0.08259	0.05602		0.04468	0.07778	0.12842	0.09186	0.40000
						0.16017	0.16113	0.01850	0.29779	0.06354	0.07066			0.04896			0.31540	0.37487	1.72047	0.80000	0.84856	7.14743	2.16470	0.03462		0.02267	0.02267	0.05178	0.04469		0.06866	0.07968	0.15442	0.20027	0.20000
						0.03421	0.08065	0.01850	0.13029	0.08069	0.06320			0.05207			0.46374	0.75295	1.31133	1.53594	1.89737	6.47765	2.00477	0.03610		0.04659	0.03160	0.09993	0.04469		0.07066	0.05600	0.28284	0.14099	0.09081
						0.01850	0.12505	0.01853	0.10722	0.06364	0.06585			0.03462			0.43202	0.63246	1.49071	0.77021	2.73550	3.67072	1.03078	0.03462		0.03421	0.00000	0.10329	0.03585		0.04626	0.05593	0.22787	0.14477	0.22787
						0.03421	0.07722	0.03662	0.26622	4.404532e-4	0.20313			0.08066			0.30501	0.95972	3.95640	0.40013	3.23562	2.41661	0.33798	0.09583		0.03160	0.01310	0.09993	0.05792		0.04926	0.01454	0.12842	0.14477	0.14202
						0.03421	0.18857	0.01853	0.25539	0.08226	0.30310			0.12719			0.30021	0.80000	3.01040	0.20000	4.15973	2.58441	1.72047	0.03610		0.01850	0.01310	0.13029	0.01465		0.03585	0.03140	0.22787	0.32048	0.10919
						0.12509	0.14360	0.04470	0.13597	0.08259	0.17746			0.14132			0.33376	1.00000	2.97321	0.31706	4.49444	3.65208	2.51027	0.06469		0.03662	0.01310	0.13029	0.05610		0.06543	0.05593	5.807065e-9	0.00000	0.15442
						0.02267	0.15478	0.05923	0.19222	0.04801	0.29918			0.22221			0.25833	0.84856	3.90596	0.72656	3.46215	4.44122	1.65517	0.08189		0.07851	2.192690e-18	0.04469	2.476031e-3		0.06488	0.09053	0.09081	0.20000	0.10919
						2.790495e-17	0.16863	0.05923	0.24680	0.03420	0.27193			0.09993			0.20945	2.05913	1.94388	1.78369	2.99954	6.14553	1.26800	0.09988		0.12973	0.01310	0.04838	0.08548		0.06320	0.03481	0.10919	0.20000	0.10919
						0.01850	0.24605	0.04470	0.04469	0.03661	0.14549			0.08986			0.15896	2.15407	1.84789	0.63246	3.04631	6.70911	0.40851	0.04906		0.16022	0.01310	0.05923	0.02400		0.08403	0.05597	0.20000	0.40000	1.318868e-8
						0.03421	0.23888	0.05923	0.13029	0.12973	0.05469			0.08662			0.27467	1.78885	1.78176	0.80852	2.54675	1.04513	0.56569	0.05105		0.17321	0.01850	0.05178	0.05775		0.17494	0.08191	0.20000	0.20000	0.15442
						0.02267	0.03421	0.05923	0.11762	0.06582	0.08938			0.05560			0.30255	1.70511	1.52121	0.68294	2.02015	0.78385	0.68294	0.09585		0.13407	0.01850	0.05340	0.21970		0.19036	0.04469	0.14202	0.31265	1.816088e-8
						0.03421	0.05178	0.04838	0.06585	0.06312	0.18426			0.11226			0.58519	1.70880	2.39242	1.63661	2.55764	1.23804	0.14347	0.03462		0.07741	0.03662	0.03160	0.05556		0.03160	0.03160	0.15442	0.22503	0.10919
						0.02267	0.06714	0.03661	0.14304	0.19986	0.22567			0.27210			0.83869	0.62708	1.66667	3.38340	2.91456	0.60653	0.82108	0.01414		0.04469	0.36396	0.05475	0.10920		0.12725	0.07786	0.14202	0.22251	1.749195e-9
						0.06320	0.04470	0.08259	0.38167	0.46198	0.22567			0.24119			0.58643	0.14347	0.89633	8.80025	2.51495	0.41678	0.48995	0.13632		0.05475	0.30403	0.05178	0.09978		0.11613	0.04854	0.09081	0.10976	0.09081
						0.04469	0.03661	0.05178	0.50498	0.47631	0.14549			0.21279			0.58094	0.60571	0.67862	7.23381	2.95296	1.16619	0.62708	0.14693		0.03164	0.26991	0.07066	0.16840		0.07968	0.03160	0.20000	0.22503	0.22787
						0.01850	0.03661	0.05340	0.59338	0.50538	0.23970			0.24433			0.64239	1.15234	0.20000	7.11613	2.72029	1.48982	1.20570	0.23063		0.04659	0.51155	0.05475	0.03160		0.11973	0.05896	0.10919	0.20000	0.12842
						0.10094	0.03160	0.03160	0.22567	0.88489	0.19480			0.14693			0.49939	0.77021	1.60215	5.67185	3.24107	1.97990	1.65517	0.20111		0.06320	0.81425	0.08844	0.14678		0.14960	0.03126	0.15442	0.20000	0.12842
						0.06355	0.03421	0.01310	0.19005	0.97717	0.17746			0.29134			0.72417	0.77021	2.90620	5.46011	3.60555	1.41421	2.00296	0.16905		0.07630	0.64960	0.09313	0.13541		0.12388	0.03478	0.21965	0.14268	0.21965
						0.12132	0.05010	0.03662	0.28709	0.81243	0.05010			0.15800			0.34157	0.35355	3.43909	4.46287	3.15316	1.05279	2.26274	0.05835		0.05010	0.85086	0.12973	0.07969		0.06544	0.05189	0.21965	0.21861	0.32791
						0.06574	0.03421	0.06320	0.42731	0.78174	0.09993			0.15410			0.18710	0.87119	1.61245	5.63517	2.39290	0.00000	2.36357	0.05835		0.04659	0.73703	0.08938	0.03261		0.07818	0.05209	0.15442	0.13823	0.30919
						0.09647	0.03421	0.13407	0.36453	0.68329	0.19986			0.44757			0.13172	0.13823	1.29353	4.97280	2.79508	0.44721	1.65368	0.07863		0.05010	0.49964	0.03421	0.12605		0.08935	0.03613	0.15442	0.09268	0.32791
						0.08259	0.22159	0.17787	0.31600	0.60206	0.31758			0.33591			0.08264	0.00000	0.40851	6.04649	1.58759	0.58941	1.02320	0.03462		0.03160	0.31282	0.01850	0.14106		0.01454	0.04705	0.22787	0.10952	0.22787
						0.13521	0.34181	0.15164	0.25276	0.31995	0.45668			0.06557			0.23800	0.08294	2.60768	6.09351	0.66667	0.40000	1.71507	0.04906		0.04469	0.29811	0.03421	0.23527		0.03390	0.04915	0.28284	0.15254	0.17752
						0.08259	0.38367	0.09993	0.14773	0.17876	0.38055			0.09993			0.16449	0.20000	2.83327	7.30446	1.74740	0.37487	2.38349	0.29086		0.05475	0.16974	0.01853	0.07968		0.08379	0.03185	0.21965	1.221825e-9	0.15135
						0.15050	0.36849	0.10948	0.34542	0.27756	0.32526			0.04469			0.02247	0.20000	1.89737	5.23898	0.91706	0.68294	1.53019	0.36030		0.05475	0.21198	0.01850	0.07229		0.06546	0.03702	0.22787	0.09843	0.81801
						0.13029	0.36000	6.158455e-17	0.20234	0.29811	0.21198			0.11394			0.02469	0.29484	1.63111	6.26536	1.08611	0.60653	2.17145	0.32205		0.04470	0.26128	0.05475	0.16243		0.12237	0.05649	0.22787	3.101139e-10	0.61351
						0.08259	0.24487	0.06585	0.14773	0.30555	0.07742			0.01746			0.04469	0.20000	1.48294	4.25790	0.60000	0.58941	1.32741	0.35184		0.03160	0.12973	0.09908	0.14914		0.10439	0.05024	0.20000	0.10952	0.50557
						0.07742	0.03421	0.04470	0.14649	0.28738	0.32226			0.04469			0.11033	0.23174	0.86054	3.56090	0.34649	0.44839	1.06751	0.31780		0.01310	0.16213	0.09583	0.35571		0.08938	0.02197	0.29081	0.15254	0.20000
						0.04838	0.16619	0.10722	0.57230	0.24253	0.39846			0.08000			0.03160	0.20000	1.34385	2.61386	0.71706	0.96932	0.80852	0.09480		0.03421	0.58779	0.10329	0.11451		0.04863	0.03476	0.18254	0.10829	0.20000
						0.02267	0.20234	0.08938	0.51216	0.09993	0.43760			0.11406			0.03462	0.11706	1.21655	4.04595	0.40851	0.53015	0.33798	0.10894		0.05010	0.73697	0.08065	0.04984		0.05383	0.06847	0.27016	0.23068	0.42446
						0.07066	0.10481	0.08938	0.43560	0.05340	0.41299			0.05207			0.39740	0.21651	1.18652	3.16954	0.72111	0.90531	1.81108	0.00000		0.05178	1.13587	0.11394	0.03309		0.04740	0.04897	0.34286	3.507278e-8	0.28284
						0.11405	0.20114	0.08565	0.54739	0.05923	0.36306			0.03160			0.26045	0.11729	1.20286	3.24106	1.49636	1.40245	1.34164	0.08355		0.05010	1.11497	0.08759	0.09286		0.07780	0.06274	0.09081	0.09180	0.22787
						0.11179	0.18825	0.02621	0.81299	0.10948	0.29013			0.04896			0.44863	0.33798	0.60570	2.31391	0.46859	0.86054	0.68294	0.12447		0.03421	0.71503	0.12708	0.10831		0.09472	0.02083	0.20000	0.14190	0.20000
						0.15164	0.08759	0.04471	0.32222	0.23399	0.22421			0.08000			0.45688	0.23174	1.46973	2.06434	0.93286	1.40489	2.57911	0.11344		0.01310	0.24680	0.17210	0.11106		0.07861	0.02120	0.14202	0.23050	0.09081
						0.11680	0.11330	0.09908	0.18825	0.25477	0.15800			0.03160			0.49056	0.08294	2.20179	1.62482	5.21646	1.60428	2.81651	0.08662		0.07066	0.21198	0.12640	0.05726		0.05221	0.03130	0.09081	0.31802	0.10919
						0.11179	0.03160	0.14363	0.30084	0.28500	0.07066			0.03160			0.45764	0.29484	1.45339	2.08806	3.94282	3.02477	3.41760	0.45244		0.05923	0.20645	0.07851	0.03372		0.09305	0.01537	0.09081	0.31185	0.09081
						0.21748	0.03699	0.18389	0.17119	0.22345	0.05178			0.03160			0.46010	0.51706	1.68147	2.20044	3.55652	2.02498	4.85822	0.34046		0.02616	0.26058	0.10506	0.07148		0.08124	0.03532	0.14202	0.33094	0.00000
						0.01850	0.11762	0.14773	0.13407	0.12514	0.20234			0.02469			0.52477	0.34649	1.95835	1.75086	4.86732	2.34094	4.57638	0.42906		0.04659	0.30852	0.04503	0.14205		0.09019	0.20577	0.10919	0.49904	0.09081
						0.03421	0.06343	0.15789	0.05475	0.09570	0.25483			0.12235			0.39595	0.40000	0.77021	1.07433	3.34636	1.78885	1.00000	0.65738		0.03160	0.13597	0.08187	0.29172		0.07730	0.04486	0.14202	0.48248	0.10919
						0.04469	0.04838	0.05340	0.07066	0.14072	0.05039			0.05560			0.28075	0.21651	2.23352	1.38073	2.31706	1.03926	0.66269	0.61080		0.15854	0.43572	0.02267	0.27650		0.06346	0.09385	0.22787	0.62216	0.00000
						0.06343	0.06714	0.10329	0.05178	0.05178	0.07066			0.08355			0.07066	0.51042	2.68328	0.82108	3.49285	1.40000	0.95255	0.48027		0.15800	0.51724	0.05923	0.22793		0.04855	0.08946	0.22787	0.29862	1.557548e-8
						0.03206	0.06454	0.11323	0.06585	0.10481	0.11405			0.08189			0.01414	0.25000	3.40088	1.00050	2.34637	2.06434	1.50358	0.63774		0.13029	0.43913	0.03160	0.15597		0.04471	0.05621	0.22787	0.22425	1.546577e-8
						0.07104	0.07741	0.06585	0.13029	0.07851	0.19480			0.08264			0.09993	0.54622	4.37321	1.21095	2.51027	1.29353	1.41427	0.58591		0.15908	0.62224	0.09128	0.16503		0.06489	0.12760	0.14202	5.810793e-5	0.09081
						0.01417	0.08844	0.11384	0.12640	0.10329	0.27549			0.12122			0.11314	1.08954	3.83692	0.63246	3.79899	0.84856	0.33333	0.53894		0.19222	0.67034	0.07630	0.18836		0.03482	0.03578	0.21965	0.08980	0.00000
						0.19222	0.12388	0.09313	0.05178	0.16619	0.15050			0.11662			0.04906	0.75713	2.24895	1.00000	3.16228	0.71162	1.11803	0.72821		0.03421	0.45566	0.12180	0.34884		0.03489	0.01472	0.29081	0.21771	0.10919
						0.22197	0.12505	0.11394	0.04469	0.11680	0.12169			0.08662			1.754152e-17	0.57772	3.01460	1.13743	0.44721	0.37487	1.31706	0.77427		0.07741	0.30981	0.20892	0.36802		0.05136	0.07061	0.40000	0.44755	1.057407e-8
						0.19222	0.05178	0.23399	0.05178	0.01850	0.23539			0.01746			0.11360	0.52271	1.97313	1.65517	0.80429	1.02635	1.26800	0.30840		0.09495	0.18815	0.12775	0.40446		0.05799	0.06320	0.41018	0.48908	0.10919
						0.17930	0.23290	0.49168	0.03160	0.14607	0.13968			0.12251			0.04906	0.72184	1.07703	1.67362	1.21587	1.04513	1.51645	0.50580		0.11342	0.33190	0.17876	0.42798		0.03176	0.04626	0.20000	0.41231	1.624851e-8
						0.16113	0.26443	0.69852	0.02267	0.17546	0.15800			0.10938			0.16204	0.51042	1.81108	1.55582	1.69896	2.97782	1.60276	0.44298		0.04469	0.19005	0.54093	0.42375		9.937444e-7	0.02240	0.22787	0.51194	0.10919
						0.02616	0.30832	0.92843	0.01853	0.26443	0.08065			0.10526			0.19814	0.72656	3.38937	0.93498	3.56830	2.14068	0.60653	0.53557		0.05178	0.30713	0.47124	0.34161		0.03160	0.08938	0.10919	0.31817	0.10919
						0.03421	0.34764	0.67622	0.01310	0.33519	0.17546			0.07066			0.22787	1.21095	3.42105	0.52271	3.49216	1.72982	1.00000	0.25691		0.11897	0.39595	0.58188	0.31132		0.01675	0.15800	0.09081	0.30165	0.10919
						0.03160	0.20892	0.58825	0.05923	0.21233	0.09313			0.09440			0.27696	1.07703	3.31059	1.26491	2.33238	1.62482	1.21699	0.36915		0.12514	0.44364	0.47819	0.28424		0.03826	0.25477	0.10919	0.23066	0.22787
						0.17017	0.06454	0.42293	0.03661	0.27703	0.16867			0.06707			0.25833	0.95255	3.74493	0.11729	2.80421	1.69478	1.21655	0.27432		0.10722	0.47223	0.43392	0.31112		0.05071	0.15457	0.28284	0.22425	0.14202
						0.12505	0.02616	0.27331	0.01850	0.25324	0.15050			0.12122			0.08252	1.29843	4.26210	0.60000	2.38082	0.48294	1.71906	0.07066		0.08376	0.29811	0.31282	0.27882		0.07066	0.07969	0.20000	0.10165	0.20000
						0.13968	0.06453	0.01850	0.04659	0.36852	0.15260			0.03462			0.09159	0.89066	1.18603	1.10125	3.62259	0.25000	1.71906	0.19311		0.06454	0.20355	0.01310	0.21207		0.08014	0.02240	0.21965	0.23066	0.10919
						0.12505	0.09659	0.08274	0.08065	0.38743	0.06585			0.05105			0.06476	0.60000	0.61251	0.89443	2.83165	0.47156	1.60276	0.33165		0.02267	0.19133	0.43560	0.14456		0.09593	0.03585	0.14202	0.31817	0.12842
						0.07741	0.14765	0.05475	0.07066	0.27756	0.10481			0.06476			0.03462	0.89066	0.14347	0.40013	3.31237	3.16748	1.64924	0.46418		0.12388	0.25539	0.48455	0.11130		0.06101	0.09370	0.14202	0.23066	0.09081
						0.01853	0.01850	0.14765	0.07085	0.23399	0.07630			0.06476			0.03462	1.32225	0.65372	0.55440	0.89066	2.44703	2.50599	0.42194		0.13029	0.29134	0.42651	0.12663		0.06543	0.02073	0.12842	0.10165	0.11351
						0.04469	0.05923	0.19442	0.09908	0.28738	0.09659			0.07066			0.08000	0.42495	0.70752	1.20286	0.63233	2.23128	2.67675	0.59973		0.13407	0.21748	0.23853	0.17818		0.03640	5.266998e-7	0.10919	0.22425	0.15135
						0.01853	0.17650	0.17017	0.08759	5.391824e-3	0.06454			0.05560			0.03610	0.80429	0.37487	1.60215	0.79327	1.47403	2.83534	0.69515		0.11394	0.07851	0.31122	0.36714		0.03483	0.03585	1.656760e-8	0.11226	0.47140
						0.08938	0.23005	0.24814	0.02616	0.15646	0.08274			0.07066			0.01414	0.71162	0.57772	0.96932	0.95024	1.27302	2.74921	0.63054		0.12169	0.13422	0.56633	0.47047		0.06506	0.04469	2.340519e-8	0.28886	0.44118
						0.05340	0.19611	0.19228	0.07066	0.07323	0.11680			0.06557			0.02247	0.21651	1.60276	2.03004	1.11419	0.80852	2.06576	0.64838		0.04469	0.16113	0.55139	0.48731		0.03148	0.04469	0.10919	0.23058	0.41018
						0.05010	0.24487	0.11330	0.06714	0.09570	0.03208			0.04906			0.02469	0.34649	1.02320	1.34164	0.82202	0.92450	1.48525	0.65145		0.02616	0.09570	0.68361	0.40826		0.06510	0.02240	0.09081	0.30221	0.28284
						0.17017	0.25155	0.05010	0.14830	0.21438	0.04503			0.04906			0.07066	0.51042	0.89443	0.79146	0.48118	0.77086	1.41421	0.61110		0.16420	0.25314	0.60934	0.33547		0.05761	0.02396	0.20000	0.51225	0.10919
						0.14132	0.03421	0.06320	0.12708	0.22087	0.05340			0.03610			0.01414	0.40966	0.33798	1.07703	1.36495	1.07703	0.93862	0.56528		0.10948	0.23970	0.38984	0.19902		0.05602	0.01694	0.21965	0.49022	0.12842
						0.05923	0.07665	0.01853	0.09993	0.24853	0.18690			0.03610			0.07066	0.54622	0.60000	1.78176	0.48821	0.21651	0.32773	0.37619		0.18207	0.31625	0.27183	0.10206		0.09067	0.03160	0.14202	0.15739	0.28284
						0.11680	5.840853e-4	0.08259	0.10791	0.29197	0.13029			7.016622e-18			0.12447	6.20036	0.57772	1.00000	0.82193	0.00000	0.69290	0.23611		0.25772	0.45037	0.17017	0.03160		0.03608	0.11394	0.32791	0.13908	0.54706
						0.24177	0.03410	0.01850	0.08259	0.12708	0.20892			0.01414			0.05835	5.13135	0.65372	2.39370	0.00000	0.20000	0.82462	0.13029		0.36209	0.36852	0.07066	0.03483		0.05101	0.07832	0.32791	0.15496	0.52999
						0.14549	0.01849	0.05340	0.08187	0.12505	0.22159			0.03462			0.03462	3.88330	0.69290	1.95137	0.44564	2.28294	0.63246	0.07734		0.25477	0.16235	0.23694	0.03483		0.04854	0.07824	0.41464	0.28592	0.41126
						0.12388	0.05341	0.03160	0.12909	0.06454	0.14304			0.10227			0.07802	3.05287	0.80852	2.56125	1.05822	2.60768	0.80429	0.08000		0.14490	0.13793	0.13950	0.13619		0.03274	0.08938	0.60985	0.39125	0.52999
						0.07066	0.10713	0.07085	0.13437	0.04469	0.18426			0.14347			0.01414	2.66288	0.48995	3.14078	1.57329	3.68782	1.20000	0.07802		0.10870	0.13688	0.62580	0.11044		0.02932	0.08937	0.51723	0.22348	0.30466
						0.09993	0.05323	0.13029	0.14607	0.04469	0.12514			0.15549			0.07066	1.07433	0.52271	2.89036	0.96286	4.48771	1.04906	0.04906		0.14132	0.13597	1.05826	0.13029		0.08136	0.06320	0.41018	0.14074	0.32225
						0.16113	0.10485	0.05923	0.02267	0.19222	0.37093			0.20549			3.307694e-17	1.11051	1.00343	3.20000	0.38275	3.37828	1.16119	0.08252		0.18747	0.26058	0.72319	0.24021		0.02933	0.02240	0.30466	0.70879	0.10919
						0.19222	0.14304	0.13407	0.03661	0.14830	0.59810			0.21354			0.03163	1.94661	1.62304	2.93591	0.29484	1.49928	0.72656	0.16544		0.18747	0.36993	0.64452	0.24782		0.07846	0.03153	0.35859	1.01268	0.10919
						0.04469	0.42970	0.14773	0.07066	0.21233	0.60384			0.05207			0.09159	2.48980	1.69967	2.74921	0.21651	0.93498	1.00000	0.08252		0.33512	0.37659	0.91203	0.16721		0.06474	0.01694	0.43930	1.10379	0.14202
						0.11394	0.28615	0.03160	0.05802	0.21659	0.68708			0.07897			0.04493	3.75558	2.00000	2.11706	0.44721	0.44721	0.79206	0.14728		0.40594	0.46437	0.88081	0.23527		0.03168	0.09639	0.26992	1.29988	0.10919
						0.08170	0.22120	0.14132	0.13597	0.13597	0.82592			0.12728			0.04586	3.49285	1.94365	2.40285	0.14347	1.24118	0.79206	0.23366		0.39971	0.50579	0.08065	0.22599		0.05082	0.17555	0.14150	1.38964	0.09081
						0.04469	0.25317	0.05923	0.01417	0.04838	0.39971			0.41882			0.04469	5.12250	1.83716	2.25475	0.20000	1.72047	1.34629	0.15095		0.29013	0.50953	0.76886	0.17676		0.12636	0.16113	0.14275	0.69910	0.09081
						0.03160	0.19050	0.12973	0.11762	0.06454	0.30930			0.74920			0.07066	2.97321	1.46973	3.15714	0.82462	1.82745	1.41421	0.18872		0.26622	0.32534	0.71595	0.20012		0.14486	0.16464	0.20016	0.60000	0.20000
						0.11680	0.02267	0.01850	0.08938	0.01310	0.29134			0.84806			0.11394	3.00472	1.20000	4.19158	1.11706	2.30674	2.84800	0.36642		0.25776	0.25701	0.92778	0.18141		0.05138	0.17349	0.36829	0.60000	0.21965
						0.11897	0.11897	0.17546	0.15800	0.09313	0.08259			0.65833			0.18426	0.49692	1.35469	3.88597	0.33798	1.52315	3.40037	0.33591		0.28264	0.14765	0.84629	0.19832		0.03587	0.12717	0.52970	0.30362	0.29081
						0.10481	0.21855	0.20034	0.05923	0.13660	0.18960			0.67408			0.19010	0.37487	0.85660	3.29848	0.48294	1.13483	3.66421	0.36528		0.26999	0.04838	1.03264	0.02417		0.03276	8.006159e-7	0.66580	0.31056	0.20000
						0.04469	0.15808	0.20491	0.12505	0.12514	0.39394			0.53410			0.26235	2.34698	0.20000	3.15966	0.63246	0.44721	4.20082	0.21357		0.23441	0.08759	1.10280	0.41397		0.06487	0.05792	0.49367	0.22299	0.25000
						0.03421	0.07066	0.08938	0.29978	0.10481	0.39595			0.17272			0.26751	0.44839	0.89443	2.41905	0.55577	0.25000	3.90909	0.11394		0.22356	0.01853	1.16909	0.30313		0.03250	0.04626	0.49027	0.16505	0.15135
						0.02267	0.06320	0.10481	0.29134	0.08065	0.50154			0.03610			0.19040	1.52121	0.88404	2.11339	1.00538	0.66667	4.28294	0.22588		0.27331	0.03421	0.59941	0.28490		0.13568	0.06705	0.28281	0.11033	0.18199
						0.04838	0.05340	0.05923	0.25276	0.03421	0.49964			0.17228			0.30516	0.94281	0.71162	2.14342	0.93447	5.36348	4.00500	0.14132		0.22159	0.04838	0.33239	0.04469		0.16526	0.07968	0.30466	0.28284	0.13649
						0.24789	0.15313	0.15800	0.26058	0.11330	0.30701			0.26535			0.15896	1.51511	1.67362	2.61873	2.33643	4.43001	4.45805	0.17783		0.20270	0.05010	0.48361	0.40115		0.10650	0.02240	0.30919	0.22285	0.32791
						0.25477	0.17314	0.25357	0.45745	0.10948	0.29590			0.18872			0.07066	1.95256	2.52364	2.69072	3.29940	3.70669	5.28025	0.15713		0.45660	0.05475	0.02267	0.51601		0.09992	0.02396	0.28288	0.22285	0.10919
						0.26058	0.05474	0.25796	0.10481	0.17315	0.13407			0.15821			0.05105	2.15407	3.53684	2.83927	2.13019	2.74635	5.09902	0.13029		0.70971	0.03421	0.22027	0.37381		0.08155	0.06735	0.44721	0.41665	0.14202
						0.30084	0.12973	0.32821	0.08844	0.22552	0.29197			0.15437			0.06476	1.68496	2.69072	2.75380	1.97750	2.01991	6.40031	0.11314		0.75307	0.07741	0.08938	0.44768		0.09964	0.01559	0.41464	0.41665	0.22787
						0.30414	0.08273	0.28264	0.25478	0.15050	0.12640			0.11355			0.06557	1.96977	2.52982	2.29081	1.23538	1.00683	6.75560	0.07802		0.92992	0.03160	0.12169	0.28264		0.03160	0.03228	0.60000	0.13869	0.14202
						0.03662	0.13027	0.16575	0.28468	0.11405	0.18240			0.16762			0.22345	2.36047	2.00998	1.44729	1.17862	2.80713	6.35366	0.17828		0.90358	0.08759	0.30701	0.12183		0.04854	0.05130	0.71498	0.09603	0.21965
						0.06585	0.09481	0.06318	5.385953e-3	0.07630	0.16575			0.16033			0.31758	0.88294	1.51645	1.72047	1.32298	3.75143	5.87330	0.06320		0.64357	0.07630	0.21855	2.282624e-3		0.03692	0.03245	0.32225	0.13869	0.21965
						0.05340	0.14363	0.27856	0.25279	0.07066	0.06454			0.14227			0.48917	0.28294	0.68294	0.80000	2.03726	5.19694	4.49620	0.14162		0.47631	0.11554	0.16113	0.03160		0.07066	0.03476	0.60985	4.718922e-8	0.14202
						0.05475	0.14607	0.26058	0.18963	0.03662	0.01850			0.03767			0.58380	0.66337	1.11929	0.23174	0.54622	0.19510	3.10483	0.13823		0.37808	0.05474	0.20892	0.03160		0.17544	1.152292e-4	0.21965	4.709924e-8	0.09081
						0.06714	0.11762	0.27856	0.09984	0.01850	0.06320			0.13407			0.55466	0.66337	0.51042	0.56569	0.39633	1.19069	2.44811	0.19876		0.22197	0.11680	0.28230	0.07969		0.03585	0.01678	0.20000	0.11033	0.14202
						0.03420	0.03662	0.27313	0.06314	0.02616	0.12640			0.13361			0.27210	1.21655	0.34649	0.29484	0.40000	0.21651	3.20122	0.07066		0.25776	0.13597	0.49923	0.11394		0.05792	0.01680	0.20000	0.09603	0.21965
						0.01836	0.08064	0.27662	0.09570	1.075089e-17	0.03160			0.26732			0.20618	0.34649	0.31706	0.53015	0.92450	0.21651	3.16228	0.03462		0.48235	0.11814	0.29446	0.11394		0.05602	0.01463	0.21965	8.026401e-9	0.28284
						0.01831	0.03421	0.06585	0.04835	0.04469	0.03160			0.24368			0.19222	0.30620	0.14347	0.28294	0.66337	0.21651	3.55487	0.03462		0.37543	0.16331	0.19228	0.10206		0.07066	0.06306	0.40000	0.20000	0.27456
						0.02613	0.07630	0.09570	0.17930	0.02616	0.09480			0.36186			0.22120	0.20000	0.20000	0.28284	0.66337	0.40000	3.98497	0.14693		0.27541	0.17527	0.27130	0.15800		0.07969	2.067796e-5	0.14202	0.09603	0.36608
						0.01865	0.13029	0.04470	0.08253	0.03160	0.07418			0.14819			0.28615	0.21651	0.41678	0.55440	0.72111	0.72111	4.56070	0.36174		0.44364	0.07042	0.19986	0.12414		0.08938	3.799915e-5	0.15442	0.11033	0.18199
						0.01369	0.11762	0.07630	0.17629	0.03662	0.07076			0.20234			0.63279	0.30620	0.17933	1.00683	0.90907	0.37487	5.47152	0.28622		0.15317	0.05427	0.24789	0.11883		0.04926	0.01460	0.21965	0.35772	1.933221e-8
						0.02692	0.07066	0.07066	0.07741	0.05010	0.16643			0.06707			0.47400	0.08294	0.33333	1.60702	0.61131	1.00050	5.79187	0.30772		0.27962	0.04784	0.12514	0.14132		0.05782	0.03480	0.09083	0.13869	0.10919
						0.03424	0.03421	0.09659	0.08058	0.01310	0.13424			0.05835			0.45244	1.11929	1.41421	2.18961	0.23174	0.52367	5.87819	0.24066		0.47292	0.03206	0.19133	0.10028		0.05976	0.07988	0.21968	0.22183	0.15442
						0.07889	0.01310	0.24348	0.13407	0.01310	0.04003			0.08662			0.16113	1.37656	1.06066	2.35702	0.20000	1.08294	0.36086	0.21357		0.52819	0.04618	0.15854	0.06543			0.01464	0.10918	0.22247	0.20000
						0.08068	0.14773	0.22378	0.04469	0.01310	0.13029			0.04896			0.23601	1.86548	0.41678	2.00000	0.08294	0.93814	0.00000	0.28615		0.40405	0.03424	0.29138	0.10089			0.01466	0.30919	0.22856	0.20000
						0.12475	0.11169	0.15331	0.05475	0.01310	0.09908			0.03610			0.13361	0.33333	1.04906	1.40489	0.28284	0.44721	0.23174	0.20477		0.23005	0.03409	0.25276	0.07837			0.02066	0.39999	0.20000	0.22787
						0.05486	0.03412	0.11244	0.13968	0.04469	0.22345			0.07863			0.09639	0.35355	0.85660	1.03926	0.23174	0.21651	0.44721	0.17017		0.38367	0.06335	0.24789	0.08196			0.03480	0.30917	0.22247	0.36824
						0.07052	0.12710	0.17017	0.13408	0.01310	0.22345			0.05560			0.17502	0.41678	0.34649	0.71162	0.20000	0.49692	0.79146	0.07066		0.62174	0.04836	0.28264	0.09635			0.02235	0.31061	0.20000	0.41018
						0.03486	0.16815	0.14363	0.09128	0.19005	0.31918			0.08000			0.06469	0.33798	0.63246	0.29484	0.29484	0.83644	0.80852	0.09272		0.58014	0.01301	0.14304	0.05775			0.01695	0.20000	0.22512	0.44721
						0.01323	0.09997	0.17315	0.08170	0.09993	0.34837			0.03462			0.22345	0.40851	1.13743	0.56569	0.11729	0.51042	0.48995	0.06320		1.10018	0.05860	0.25477	0.04922			0.01696	0.14215	0.09699	0.09081
						0.06573	0.06585	0.27058	0.08938	0.09480	0.29978			0.03462			0.31323	0.11706	0.71706	0.62708	0.28294	0.34649	0.74443	0.14728		0.52449	0.05461	0.17930	0.13097			0.03477	0.15449	0.44841	0.21965
						0.03655	0.03160	0.19986	0.12180	0.09583	0.27313			0.07802			0.16449	0.10367	0.93814	0.88294	0.16555	0.80000	0.21651	0.19040		0.29779	0.04656	0.06454	0.07058			0.02240	0.10921	0.50203	0.09081
						0.09576	0.14132	0.09659	0.06714	0.07851	0.23863			0.03160			0.07066	0.33333	0.55440	0.20000	0.21651	0.21651	0.95255	0.22120		0.30141	0.06442	0.29134	0.05816			0.06533	0.21974	0.42741	0.14202
						0.10867	0.13216	0.13407	0.12180	0.09659	0.20515			0.03610			0.04469	3.28295	2.31706	0.44721	0.40013	0.20000	0.80429	0.10526		0.39662	0.06685	0.34903	0.02979			0.02396	0.15442	0.20000	0.10919
						0.16574	0.08274	0.25672	0.13406	0.05923	0.13950			0.01414			0.11226	3.01040	0.52271	0.40851	0.80000	0.14347	1.52157	0.15199		0.24177	0.07252	0.24853	0.01615			0.05142	0.21965	0.20000	0.14202
						0.15887	0.14363	0.20892	0.16420	0.04469	0.25477			0.03610			0.14491	2.91456	0.40851	0.56569	0.86054	0.11706	1.53594	0.08252		0.71293	0.03424	0.26941	0.26770			0.09587	0.36824	0.09619	2.127284e-8
						0.19442	0.03160	0.53752	0.19611	0.16974	0.20034			0.03462			0.17828	2.20044	2.10066	0.20000	0.55972	0.62708	2.01050	0.17772		1.02536	0.02901	0.20234	0.17765			0.04630	0.32225	0.20000	0.10919
						0.13393	0.03421	0.61555	0.08938	0.14773	0.11244			0.11314			0.09585	2.81426	0.52367	0.60000	0.67862	0.42495	1.16644	0.16113		0.82889	2.580861e-3	0.16575	0.20082			4.299025e-4	0.29081	0.20000	0.12842
						0.11226	0.01310	0.64665	0.06454	0.22120	0.15800			0.10674			0.08252	4.43137	2.11339	0.60653	0.63246	0.37487	1.00000	0.16838		0.86883	0.03672	0.18825	0.14912			0.03099	0.36824	0.10319	0.28284
						0.06873	0.09993	0.41080	0.17876	0.17017	0.09659			0.08355			0.13029	3.46791	1.00000	1.11706	0.11706	0.57772	0.11706	0.29139		0.87871	0.03453	0.11680	0.18595			0.03476	0.14202	7.184880e-6	0.20000
						0.10718	0.03160	0.52063	0.23853	0.19050	0.15808			0.11394			0.14728	2.61926	1.13483	1.07703	0.23174	2.00489	0.14347	0.09639		0.74282	0.05507	0.19228	0.12829			0.03177	0.09081	0.14863	0.72099
						0.07413	0.08274	0.25477	0.30282	0.08274	0.15315			0.11662			0.15410	2.57515	1.78885	1.04906	0.14347	1.48096	0.56015	0.06937		0.33591	0.04004	0.14649	0.09352			1.637738e-4	0.28284	0.14863	0.81354
						0.08072	0.12180	0.34309	0.25776	0.15800	0.03662			0.07066			0.20945	2.05913	0.60571	1.31706	0.28284	0.89443	0.56545	0.13029		0.38051	0.08238	0.13407	0.20263			0.03094	0.10919	0.10384	0.74934
						0.04800	0.11405	0.49964	0.27965	0.07066	0.13029			0.06320			0.20618	0.41678	0.28294	1.49636	0.60571	0.73923	0.41678	0.21198		0.49563	0.03785	0.19050	0.08996			0.05566	0.12842	0.11039	0.89387
						0.07095	0.09570	0.58205	0.08376	0.06454	0.01310			0.06320			0.07929	0.71706	0.51706	0.88682	0.28294	1.26491	0.20000	0.32542		0.53720	0.06465	0.24680	0.17338			0.04321	0.14202	0.14866	0.89473
						0.03419	0.09583	0.47462	0.06454	0.07066	0.07066			0.04906			0.14132	1.00000	0.08294	0.82108	0.42495	1.45602	0.11706	0.38359		0.39339	0.07112	0.05474	0.13540			0.04428	0.09081	0.11033	0.14096
						0.09908	0.10870	0.47434	0.03421	0.09993	0.09659			0.02000			0.06557	1.19510	0.51042	1.00683	0.44721	1.07703	0.25000	0.44404		0.46358	0.08750	0.33599	0.31174			0.03470	0.12842	6.458644e-5	0.15263
						0.07092	0.03160	0.30614	0.11554	0.07066	0.04469			0.09993			0.09993	0.36086	0.62708	0.58941	0.55902	1.82745	0.69463	0.34629		0.35935	0.03221	0.53752	0.22831			0.03571	0.22787	0.10143	0.09076
						0.07631	0.10481	0.12708	0.03662	0.18747	0.03160			0.16449			0.09988	0.25000	0.52367	1.01980	0.68085	3.05654	2.41215	0.58294		0.21048	0.03234	0.60123	0.38053			0.06650	0.21965	7.587988e-5	0.09070
						0.14490	0.06454	0.04469	0.03421	0.14607	0.14549			0.28622			0.09988	0.86054	0.20000	0.93862	1.04272	0.11729	2.09203	0.68253		0.08065	0.03422	0.65938	0.25939			0.02391	0.09081	0.09877	0.22695
						0.09993	0.05475	0.08274	0.03421	0.12169	0.27313			0.28622			0.09585	0.32773	0.82108	0.77086	0.97386	0.71162	1.72867	0.29264		0.07851	0.01853	0.63167	0.15069			0.03105	0.22787	0.19997	6.068855e-4
						0.03421	0.06454	0.09128	0.07085	0.20229	0.40600			0.34585			0.16449	0.40851	0.77086	0.42495	0.77909	2.40285	2.08806	0.32540		0.03662	0.04468	0.15315	0.04618			0.04688	0.14202	0.09875	0.20000
						0.10729	0.04469	0.05010	0.09659	0.12180	0.47610			0.14162			0.02469	0.37487	0.93054	0.55440	0.35595	5.36475	1.31706	0.18872		0.07851	0.01853	0.11244	0.02238			0.04419	0.31063	0.20087	0.19990
						0.08259	0.11244	0.07742	0.09480	0.08274	0.65242			0.04574			0.01414	0.33798	0.54622	0.63246	0.44493	8.79240	1.04906	0.12235		0.05340	0.03662	0.09908	0.02237			0.09403	0.42446	0.29866	0.19957
						0.03160	0.12775	0.08376	0.13029	0.12640	0.55928			0.17740			0.03160	0.34649	1.00000	0.80000	0.66667	0.81668	1.15234	0.23746		0.03160	0.03660	0.17746	0.07967			0.08007	0.09081	0.10228	0.22043
						0.03421	0.08065	0.10329	0.05923	0.11330	0.63358			0.09159			0.03462	0.20000	2.42888	0.77021	3.20358	2.13600	1.42387	0.24680		0.12128	0.03421	0.07692	0.14430			0.09490	0.10919	0.21950	0.32242
						0.03421	0.14773	0.09908	0.07630	0.07741	0.54550			0.08662			0.08355	0.11706	2.43311	1.44222	3.75590	2.23607	1.29843	0.31020		0.12495	0.03663	0.18398	0.07781			0.05153	0.43726	0.22393	0.35273
						0.05178	0.18426	0.05475	0.05178	0.19986	0.43162			0.06469			0.01746	0.08294	2.56924	1.05186	2.82119	3.14262	0.88294	0.11344		0.07741	0.01306	0.02225	0.06487			0.03378	0.28284	0.13335	0.19998
						0.03661	0.09908	0.10481	0.02616	0.15260	0.23430			0.17876			0.04574	0.08294	2.74921	0.79206	3.37379	2.75195	0.60571	0.27006		0.06454	0.02618	0.06269	0.07065			0.07796	0.32225	0.14814	0.32246
						0.07741	0.09908	0.06320	0.03421	0.08938	0.19222			0.24580			0.09585	0.10367	3.61394	0.28284	3.62525	4.63754	0.37487	0.20374		0.15800	0.04087	0.07022	0.01696			0.05710	0.44721	0.13337	0.20004
						0.11554	0.01853	0.06585	0.08259	0.06320	0.01850			0.12235			0.04469	0.19549	3.27936	0.20000	3.28024	0.88358	0.28284	0.20424		0.13583	0.02934	0.11405	0.08188			0.04597	0.43726	0.91438	0.29079
						7.071214e-17	0.04838	1.492680e-16	0.08259	0.12169	0.09993			0.08938			0.06239	1.33333	0.89443	0.63246	3.91683	0.79057	0.52367	0.42389		0.13017	0.01938	0.05475	0.03482			0.03589	0.20000	0.85105	0.30914
						0.04469	0.11480	0.05340	0.04659	0.32859	0.11394			0.41883			0.05989	1.45774	0.84853	0.66337	4.96790	1.41421	0.44721	0.13632		0.20035	0.03662	0.12708	0.08375			0.02314	3.276968e-8	0.82495	0.36785
						0.07741	0.05475	0.04469	0.05475	0.38573	0.31654			0.30480			0.07758	1.05279	0.86054	0.60653	4.15916	1.24118	0.29484	0.08066		0.14830	0.06585	0.12973	0.07928			0.04422	0.22787	0.75533	0.22775
						0.14363	0.03421	0.01311	0.06318	0.60372	0.22345			0.26058			0.01451	0.61131	1.08294	0.10367	4.42102	1.23290	0.42495	0.12761		0.03662	0.07851	0.19561	0.01650			0.02170	0.15442	0.89177	0.31061
						0.11394	0.08259	8.661884e-6	0.25903	0.62889	0.15908			0.35683			0.04461	0.68294	1.40000	0.47140	3.44337	1.72047	1.00343	0.06557		0.06711	0.08065	0.10722	0.04842			0.02260	0.40000	0.13023	0.41463
						0.07741	0.01927	0.06457	0.28264	0.55747	0.27130			0.43069			0.03461	0.97033	1.20000	1.10561	2.62652	1.83864	0.89066	0.26209		0.07066	0.08259	0.23864	0.09610			0.07131	0.21965	0.13023	0.21971
						0.16974	0.18426	0.09572	0.32365	0.42995	0.18240			0.20344			0.03459	0.42248	0.72184	1.13163	1.80191	1.20000	1.00536	0.22193		0.02267	0.07066	0.25275	1.672890e-24			0.04538	0.32791	0.28284	0.20005
						0.04469	0.10329	0.14490	0.33519	0.32403	0.01850			0.29536			0.03137	0.74536	0.23174	1.13163	2.20311	1.20570	1.67239	0.24581		0.08376	0.01853	0.25772	0.02073			0.05218	0.21965	0.22062	0.12820
						0.09480	0.08759	0.09658	0.29135	0.01310	0.10481			0.14442			0.02244	0.57748	0.80000	1.04513	1.82210	1.60428	7.49367	0.25186		0.07741	7.460433e-6	0.25672	0.03483			0.03605	0.09081	0.15262	0.14104
						0.08065	0.13407	0.08170	0.05008	0.05010	0.08274			0.05835			0.09472	0.43311	1.12577	3.57693	2.03961	2.33346	5.55217	0.16901		0.02616	0.09570	0.07066	0.03483			0.03521	0.12842	0.15262	0.21945
						0.06454	0.15646	0.08260	0.18392	0.05340	0.13029			0.08000			0.09638	0.80000	0.33798	2.25000	2.97321	1.90049	4.58356	0.17998		0.01310	0.06585	0.12516	0.04626			0.04469	0.10919	0.22691	0.14242
						0.08376	0.06585	0.06458	0.13964	0.03160	0.15331			0.12882			0.14158	0.67862	0.16555	2.40832	2.32002	2.58759	3.58942	0.17984		0.06585	0.15164	0.10483	0.03585			0.03064	0.10916	4.373144e-10	0.14109
						0.03857	0.12388	0.05337	0.11329	0.01853	0.14304			0.13029			0.10986	0.82108	0.20694	2.80158	2.10693	1.60489	3.00212	0.11343		0.09659	0.18426	0.01850	0.03585			0.03513	0.09080	0.14143	1.162434e-3
						0.12643	0.16420	0.03652	0.05932	0.03662	0.10790			0.06800			0.12760	0.33798	1.05409	1.70656	1.49636	0.93447	6.36254	0.10938		0.13950	0.14304	0.07066	0.02240			0.02083	0.10919	0.28284	1.181712e-5
						0.08019	0.12973	0.03160	0.05929	0.13968	0.09993			0.15713			0.06557	0.51706	0.92402	1.59208	1.71507	1.07433	7.01344	0.11124		0.05474	0.06322	0.14304	0.03483			0.01425	0.09081	0.22883	0.22749
						0.07298	0.12708	0.04477	0.09993	0.04469	0.03421			0.10674			0.03610	0.11706	0.88429	2.18936	0.44721	1.01980	7.58947	0.20772		0.03208	0.02267	0.17011	0.03160			0.06320	0.09070	0.35363	0.35284
						0.17197	0.07066	0.03161	0.06583	0.13407	0.23580			0.02247			0.02469	0.23174	0.70743	2.40388	0.20000	0.84853	6.35295	0.17015		0.12169	0.19228	0.18958	0.03483			0.04854	0.22787	0.22062	0.38001
						0.17543	0.09480	0.04658	0.10869	0.05178	0.07066			0.01414			0.05560	0.23174	0.55436	1.24073	1.00683	1.70880	3.08451	0.11394		0.09480	0.11394	0.05385	0.04626			0.04854	0.09082	0.14177	0.47123
						0.13955	0.07741	0.03654	0.08074	0.06454	0.16420			0.11394			0.09480	0.34649	0.41687	2.04460	1.03078	1.80000	0.34649	0.25490		0.03421	0.06454	0.02240	0.06916			0.04853	0.32227	3.356543e-8	0.35342
						0.14323	0.06320	0.06320	0.08849	0.22835	0.30852			0.12595			0.09480	0.40966	0.49710	1.75162	1.75464	2.38349	4.31741	0.28622		0.04659	0.10870	0.07066	0.08753			0.04853	0.21968	0.14177	0.22770
						0.14779	0.03160	0.12639	0.18240	0.08759	0.31647			0.14132			0.07734	0.68085	0.32777	2.13031	6.07697	2.91204	3.20000	0.36054		0.14823	0.10511	0.07845	0.02338			0.00000	0.21950	0.10402	0.28278
						0.13588	0.03160	0.11404	0.19219	0.10870	0.09993			0.12432			0.06320	2.56832	0.31708	5.18650	5.78306	2.28035	4.92113	0.22038		0.09659	0.20233	0.26997	0.06706			0.01694	0.22788	0.15262	0.30439
						0.15254	0.03160	0.11330	0.14830	0.13407	0.10790			0.19672			0.03462	2.28431	0.80454	2.15058	4.90685	1.20000	7.22772	0.17017		0.09908	0.17017	0.31728	0.14125			0.01694	0.22788	0.10850	0.09081
						0.09309	0.05474	0.09480	0.16866	0.14132	0.42969			0.15800			0.03462	2.40388	1.80192	3.60555	2.37384	0.80852	8.08950	0.11374		0.11330	0.14072	0.37288	0.07073			0.02240	0.09079	0.22692	0.09080
						0.06434	0.01310	0.08170	0.24066	0.04470	0.48813			0.46212			0.04469	3.78546	1.11724	4.99367	1.80191	0.58941	5.01004	0.15196		0.07066	0.10481	0.30713	0.07907			0.04469	0.22787	0.20004	0.10918
						0.09998	0.02267	0.05909	0.03662	0.11394	0.52789			0.41104			0.12882	2.06576	1.62482	5.98682	2.45507	0.90531	5.49751	0.25666		0.09128	0.03694	0.42319	0.14202			0.04469	0.22788	0.22241	0.09080
						0.16424	0.03160	0.01310	0.23005	0.05178	0.36094			0.46094			0.12723	2.36047	1.30666	4.67303	0.80000	0.67862	4.64077	0.35330		0.22421	0.05479	0.19440	0.05183			0.04469	1.12708	0.29174	0.20004
						0.13033	0.05010	0.02271	0.17787	0.06454	0.28709			0.36915			0.10201	1.96977	1.12577	7.50356	2.08806	0.93862	4.64600	0.30530		0.23290	0.12775	0.18240	0.22067			0.02240	1.23467	0.19286	0.10918
						0.22350	0.01310	0.05175	0.38323	0.03421	0.03662			0.20708			0.09159	1.05279	0.61131	6.20574	2.00172	1.01980	2.79075	0.34903		0.33591	0.05178	0.11762	0.11469			0.02240	1.12706	0.12685	0.10919
						0.17554	0.05923	0.04659	0.28874	0.06714	0.13950			0.20374			0.14283	2.01485	1.29843	5.04574	3.21567	1.41421	2.34094	0.25372		0.24789	0.15315	0.16113	0.05071			0.02073	1.00000	0.30258	0.10919
						0.18825	0.03422	0.06460	0.34034	0.07066	0.24383			0.19222			0.11033	3.35261	0.51042	5.01239	2.91706	1.52315	2.28035	0.29621		0.24853	0.08274	0.08064	0.23404			0.01466	0.80000	0.22499	0.14202
						0.10329	0.05860	0.03160	0.29446	0.15808	0.15854			0.33346			0.12235	3.16228	0.95256	3.77359	1.55740	1.38814	2.50599	0.06476		0.15800	0.09128	0.27312	0.13407			0.01694	0.09081	0.35889	0.09081
						0.06584	0.06790	0.03421	0.14304	0.10329	0.19986			0.19986			0.23005	5.13321	0.48294	3.53562	0.89443	1.41427	3.54401	0.20234		0.16974	0.13660	0.25672	0.08147			0.02240	0.28284	0.44753	0.09081
						0.06316	0.07086	0.01856	0.02267	0.15851	0.03421			0.03160			0.22689	2.51717	0.23174	4.87213	2.34698	6.56368	5.92284	0.14054		0.08170	0.05475	0.25474	0.03160			0.03585	0.12842	0.69091	0.09081
						0.04460	0.16937	0.01858	0.03661	0.28561	0.25776			0.03160			0.25025	1.69605	0.61128	5.80000	1.62304	5.96229	7.59796	0.12719		0.15800	0.15260	0.28789	0.06320			0.07066	0.21965	0.65489	0.14202
						0.13409	0.25865	0.02270	0.06322	0.45537	0.44689			0.08662			0.33438	1.61245	0.60653	5.90677	1.18603	5.44070	7.68554	0.15800		0.10790	0.03421	0.23960	0.05602			0.02396	0.30919	0.72493	1.102069e-8
						0.20438	0.23888	7.905858e-18	0.14072	0.47393	0.35653			0.13029			0.23907	0.71706	0.34663	6.03075	12.93793	7.10480	5.92044	0.14405		0.24348	0.04469	0.04483	2.748833e-17			0.01694	0.22787	0.31714	0.21965
						0.12174	0.34870	0.24005	0.06320	0.71012	0.10971			0.12640			0.14442	0.40000	1.15234	7.55443	0.36086	6.38788	4.81046	0.12447		0.47054	0.01850	0.02267	0.06543			0.01466	0.20000	0.24154	0.14202
						0.16627	0.30350	0.28440	0.05474	0.82365	0.22345			0.14162			0.11344	1.11051	1.18652	7.44567	0.28968	6.93123	2.75000	0.11226		0.78711	0.05340	0.05780	0.03160			0.01466	0.15442	0.10070	0.09082
						0.08260	0.03421	0.26779	0.04659	0.92291	0.39484			0.08986			0.12595	1.15445	0.49001	5.40370	0.14313	6.89638	2.39242	0.04574		0.83489	0.01850	0.03421	7.016610e-18			0.01694	0.09081	0.28307	0.12806
						0.05340	0.11405	0.25480	0.03873	0.96315	0.77173			0.07066			0.06557	1.07075	0.56569	6.51153	0.48998	6.35348	0.33333	0.06557		0.73536	0.03421	0.04838	8.770762e-18			0.01466	0.32225	0.08814	0.12766
						0.04469	0.12640	0.29779	0.05748	0.55152	1.03405			0.11314			0.08000	1.31909	0.66269	6.81454	0.33751	4.26329	0.20694	0.06557		0.43018	0.05475	0.05945	0.02932			0.03483	0.36824	0.10154	0.37943
						0.07630	0.11762	0.08259	0.02630	0.52709	0.98164			0.09585			0.10247	0.82820	0.62479	4.83453	0.49001	4.72575	0.21651	0.06557		0.32513	0.12514	0.10481	0.06542			0.03483	0.35294	0.08892	0.33132
						0.06456	0.06585	0.03160	0.02630	0.60283	1.01407			0.06469			0.19986	0.62115	4.22826	4.38634	0.23174	3.86390	0.32773	0.02247		0.12973	0.09480	0.15050	0.02396			0.04469	0.44721	0.10154	0.15135
						0.05039	0.15800	0.06585	0.03580	0.37836	0.81096			0.06476			0.11394	0.49692	3.85563	4.33311	0.80414	4.30813	2.28294	0.01746		0.14028	0.11762	0.11405	0.01709			0.01466	0.15442	0.20036	0.16053
						0.01848	0.15800	0.09480	0.03856	0.25053	0.65356			0.09993			0.06476	0.44721	3.32881	0.48294	0.52375	5.85134	2.71958	0.03462		0.40468	0.17685	0.14549	0.01694			0.01466	0.14202	0.10154	0.21965
						0.05339	0.34433	0.05178	0.03374	0.75502	0.31758			0.07863			0.03610	0.63246	1.27302	2.10066	0.82505	5.83807	3.08294	0.03160		0.25314	0.40750	0.11244	0.04469			0.02073	2.512448e-8	0.10140	0.41018
						0.04837	0.27703	0.08170	0.03374	0.56968	0.51216			0.04896			0.23366	0.14347	2.00876	0.67862	1.76304	6.90351	4.11140	0.01746		0.35196	0.34785	0.13407	0.03483			0.01466	0.10919	0.20036	0.54706
						0.08065	0.19561	0.13969	0.04623	0.65356	0.71462			0.09585			0.08252	0.11706	2.68820	1.19146	2.09252	7.93161	5.01597	0.04469		0.23970	0.31122	0.14649	1.315614e-17			0.05792	1.384696e-8	0.10140	0.49454
						0.04470	0.20892	0.03439	0.05624	0.44575	0.77731			0.05560			0.15713	0.23174	2.82843	2.60450	1.69480	8.83972	3.20624	0.05835		0.47737	0.10722	0.12708	0.01466			0.01694	0.12842	9.888151e-7	0.30919
						0.09480	0.12640	0.01866	0.05168	0.79825	0.90952			0.04574			0.34766	0.35367	3.08942	4.90685	2.28040	10.10824	3.46778	0.03160		0.22345	0.13597	0.15315	0.02240			0.04626	0.28284	0.01724	0.28284
						0.05010	0.08274	0.06679	0.04646	0.74041	0.64819			0.08000			0.14125	0.57748	0.00000	7.69866	2.33327	10.73771	2.97321	0.10247		0.33747	0.14823	0.14830	0.01466			0.04853	0.23540	0.11296	0.30919
						0.07066	0.06714	0.06459	0.06970	0.94800	0.57772			0.06557			0.23005	4.00292	0.31706	7.07672	1.64720	10.30922	2.35134	0.03610		0.17930	0.18393	0.07741	0.02396			0.03160	0.29583	0.11296	0.21965
						0.05475	0.05181	0.09103	0.06579	0.72059	0.46930			0.03610			0.33778	2.18734	0.14347	5.68274	1.69706	10.32016	2.58759	0.02469		0.30852	0.10722	0.08274	0.03585			0.02073	0.22787	0.20000	0.14202
						0.05340	0.11407	0.10063	0.05280	0.71503	0.25776			0.06476			0.32540	2.68728	0.79146	4.38634	1.66751	10.11808	3.05941	0.04896		0.21077	0.33392	0.15800	0.01466			0.04469	0.20104	0.31294	0.32791
						0.03421	0.07851	0.04623	0.02139	0.29767	0.17315			0.06707			0.17740	2.89930	0.67862	1.60489	1.28369	8.04907	2.41662	0.02247		0.19133	0.23441	0.14765	2.192690e-18			0.02240	0.32822	0.08884	0.10919
						0.04659	0.05473	0.01823	0.02498	0.19754	0.32821			0.03160			0.17592	2.27790	0.89443	1.85659	4.53055	8.43801	3.01040	0.05835		0.12775	0.14132	0.21404	0.05602			0.01694	0.41079	0.08884	0.15442
						0.03160	0.15315	0.04996	7.062731e-4	0.05010	0.09993			0.04469			0.30772	2.11290	1.32154	0.08294	4.65305	8.95313	3.53499	0.03160		0.15800	0.16753	0.17650	0.05602			0.03483	0.22055	0.11337	0.21965
						0.05010	0.06584	0.06326	0.01429	0.06320	0.06454			0.08355			0.29134	1.86077	2.21812	0.31706	3.84708	8.61177	2.35702	0.01746		0.03662	0.12388	0.08065	0.03168			0.05071	0.21922	4.518076e-8	0.32791
						0.03160	0.05475	0.15203	0.02497	0.03662	0.28260			0.06320			0.15536	1.91274	0.80000	0.11706	4.52291	0.86177	1.96114	0.01746		0.03662	0.13244	0.09128	0.10067			0.05792	0.44705	0.11348	0.30919
						0.03160	0.04836	0.12003	0.06594	0.04838	0.28260			0.02247			0.65145	1.44088	0.88294	4.30713	4.67374	1.69605	2.15452	0.03160		0.02267	0.03421	0.09313	0.23527			0.04469	0.85756	0.09847	0.20000
						0.02267	0.01850	0.17371	0.03407	0.04473	0.28874			0.09639			0.81600	0.69463	0.51042	2.40832	4.16057	2.69072	0.66337	0.04906		0.03208	0.03160	0.09993	0.40940			0.08201	0.72094	0.08884	0.29081
						0.03661	0.07847	0.24437	0.01922	0.13419	0.54055			0.07734			0.84525	0.96277	1.40000	4.00524	3.27206	2.89325	1.03926	0.03160		0.04659	0.06585	0.11480	0.42649			0.04877	0.63312	0.10121	0.14202
						0.05340	0.01856	0.20421	0.03586	0.11901	0.25933			0.04574			0.80477	1.07433	2.51495	3.62215	2.93591	2.63301	1.12577	0.05835		0.06585	0.02267	0.09128	0.57665			0.01726	0.44728	0.09847	0.10919
						0.06585	0.11263	0.10481	0.02139	0.14770	0.58113			0.07066			0.77410	0.82108	1.31377	4.42454	2.52982	2.34136	1.44222	0.03610		0.11244	0.05923	0.15901	0.41201			0.01471	0.31071	0.09847	0.20000
						0.05010	0.03196	0.11897	0.07074	0.14152	0.12973			0.08938			0.35351	1.63111	1.50969	6.01664	2.30040	1.29353	0.89443	0.11816		0.16867	0.05340	0.13968	0.38201			0.03144	0.30473	2.034505e-8	0.32791
						0.05474	0.04472	0.08753	1.595419e-17	0.11756	0.07741			0.09585			0.28029	1.40000	0.52367	6.73696	2.12603	0.90907	1.05279	0.06476		0.11762	0.05182	0.08274	0.25700			0.14737	0.12857	0.20000	0.44721
						0.03662	0.07236	0.08938	0.01822	0.04460	0.10791			0.11033			0.07802	1.94949	0.52271	8.29699	2.35403	0.49001	0.89443	0.22787		0.14773	0.02267	0.17400	0.20669			0.08442	0.22788	1.289502e-8	0.63246
						0.02616	0.04459	0.03662	0.01267	0.01311	0.69546			0.09440			0.01414	1.05409	0.20000	5.57136	2.69707	0.40851	0.48995	0.11394		0.05474	0.08259	0.13029	0.06488			0.08680	0.20000	1.115760e-16	0.63246
						0.03662	0.06060	0.02616	0.01267	1.397313e-4	0.87284			0.08252			0.09993	0.26346	2.28294	5.89717	2.26167	1.26800	0.16555	0.11344		2.032590e-16	0.11499	0.06454	0.24080			0.07889	0.12842	0.12487	0.68383
						0.03421	0.05005	3.069767e-17	0.03109	0.05500	0.61171			0.07929			0.06772	0.55132	0.72111	6.24570	1.49961	2.65367	0.88404	0.28346		0.04659	0.19005	0.02267	0.20943			0.10074	0.22787	0.12487	0.68363
						3.508300e-18	0.02942	0.05923	0.00000	0.01310	0.36447			0.03462			0.06876	0.22021	0.65372	6.24663	2.30356	3.20688	0.20000	0.08189		0.03662	0.27549	0.04470	0.22646			0.05806	0.09081	0.08907	2.577628e-8
						0.01850	0.07211	0.03421	0.03655	0.01853	0.32534			0.05560			0.05207	1.01980	1.06066	6.61999	1.06751	3.12410	0.14347	0.01746		0.08065	0.24680	0.07741	0.20894			0.03600	1.354279e-8	2.580455e-8	0.13649
						0.05010	0.03813	0.05178	0.01842	0.04659	0.67818			0.21357			0.29134	0.93272	0.86177	7.95051	1.11803	3.98644	0.20000	0.22189		0.11179	0.23441	0.07066	0.18238			0.05845	7.338524e-7	0.12487	0.15442
						0.09313	0.04604	0.03421	0.03153	0.03662	1.06880			0.33783			0.45574	0.96015	1.13104	6.08276	1.33333	3.28024	0.14347	0.25477		0.23539	0.30314	0.05475	0.10803			0.01803	0.20000	6.727594e-10	0.29081
						0.05923	0.03672	0.06454	0.02261	0.04469	0.71691			0.50953			0.60104	0.85008	0.65339	7.34302	14.96101	2.18913	0.84853	0.28959		0.32226	0.22356	0.03662	0.06407			0.03633	0.10919	5.429672e-8	0.15442
						0.05010	0.02458	0.04659	0.03153	0.03160	0.32743			0.55637			0.55277	1.73209	0.86054	7.32541	12.87256	3.34299	0.28294	0.31648		0.28874	0.27286	0.11394	0.07910			0.03226	7.323579e-7	0.08907	0.22787
						0.06585	0.05340	0.03421	0.01850	0.05475	0.50560			0.51516			0.52886	2.03103	1.04906	7.21752	12.43382	2.51027	0.44839	0.39740		0.29442	0.23535	0.12973	0.10727			0.03527	0.09081	0.19604	0.22787
						0.09659	0.04491	0.08938	0.01310	0.03661	0.66861			0.40503			0.30575	1.92496	1.35469	8.28294	12.55477	3.16709	0.51706	0.44132		0.39971	0.18393	0.15808	0.10237			0.07998	0.20000	0.22522	0.09081
						0.01853	0.05420	0.07066	0.02616	0.02267	0.31915			0.33244			0.13559	2.00269	0.48995	10.21763	11.09618	3.31738	1.06751	0.15409		0.20515	0.07741	0.18747	0.08190			0.07922	0.21965	0.22522	8.746033e-10
						0.04659	0.06303	0.09480	0.03414	0.01310	0.42094			0.20477			0.04469	1.86548	1.47403	7.00098	9.12140	3.62648	1.00000	0.38192		0.17876	0.17876	0.18347	0.05006			0.06488	0.15442	0.22522	0.14202
						0.04503	0.05188	0.06714	0.03662	0.00000	0.55502			0.22689			0.32540	2.42670	1.84391	4.32169	9.83260	3.32866	1.20570	0.47432		0.34041	0.19050	0.16420	0.11233			0.06543	0.21965	0.32148	0.28284
						0.03421	0.03640	0.03662	0.02616	0.02267	0.42969			0.33417			0.14819	2.79508	3.81845	1.40245	9.80204	5.08495	0.82462	0.52535		0.41563	0.15800	0.07066	0.03484			0.08170	0.09081	0.22818	0.14202
						0.06983	0.03657	0.04470	0.01850	0.02616	0.48155			0.24259			0.09993	2.79508	4.28121	1.29692	10.02593	4.59289	1.20570	0.57091		0.35330	0.15908	0.04838	0.01804			0.03457	0.22787	0.28338	0.20000
						0.06454	0.23572	0.10481	0.01310	0.03160	0.52429			0.14386			0.14819	3.29370	3.68782	1.47403	11.30854	4.96849	0.92403	0.89905		0.44638	0.10948	1.863787e-16	0.03885			0.05033	0.21965	0.28338	0.14202
						0.07066	0.25185	0.19442	0.05340	0.04470	0.42930			0.12447			0.16687	1.20010	3.70352	1.75000	9.76524	5.49181	1.50884	0.78282		0.41323	0.08938	0.03433	0.31596			0.06647	0.10919	0.28338	0.14202
						0.08274	0.26123	0.07741	0.01853	0.03662	0.40157			0.09993			0.21198	0.72379	3.11567	4.06885	8.70952	6.24593	0.92399	0.59387		0.44501	0.08065	0.01311	0.20512			0.05033	0.14202	0.41504	0.09081
						0.06454	0.25845	0.12169	0.01853	0.20438	0.42981			0.03462			0.26535	0.72379	2.84253	0.74536	7.37371	5.64606	0.98004	0.67053		0.42930	0.19611	0.12640	0.26281			0.06488	2.154190e-8	0.29346	0.09081
						0.04469	0.26431	0.01853	0.03662	0.22087	0.09570			0.08236			0.46007	0.52701	2.60768	1.00536	6.83520	7.07424	1.12318	0.60196		0.27313	0.37295	0.05477	0.26945			0.02073	0.09081	0.71296	0.10919
						0.07066	0.09632	0.24605	0.01850	0.26128	0.09313			0.05754			0.58830	1.06237	0.44721	0.55972	5.73420	8.35225	1.00000	0.41845		0.41783	0.71649	0.06322	0.26192			0.02240	0.22787	0.32325	0.35294
						0.03662	0.10466	0.29334	0.03421	0.26443	0.06714			0.06476			0.68495	1.06237	0.90907	1.15445	6.24717	9.14112	1.20000	0.21624		0.49923	0.90107	0.05464	0.03483			0.04469	0.15442	0.32325	0.44118
						0.03662	0.05010	0.25903	0.05178	0.21709	0.23399			0.04469			1.10727	1.00000	1.56891	0.86054	1.86177	9.64154	1.45602	0.19652		0.28874	1.07751	0.04470	0.03483			0.05071	0.20000	0.32325	0.58824
						0.03421	0.05009	0.30377	0.05010	0.06320	0.34249			0.04906			1.01795	0.82776	2.67802	0.80429	1.48315	11.61268	1.55959	0.01414		0.18240	0.85340	0.16423	0.01466			0.04469	0.14202	0.51275	0.50775
						0.09128	0.05178	0.21198	0.03160	0.04838	0.07742			0.17592			0.82860	0.27592	1.88680	0.90907	1.54984	1.01089	1.86340	0.06320		0.33062	0.66691	0.20034	0.08403			0.06543	0.10919	0.36418	0.44118
						0.06322	0.02267	0.15795	0.04469	0.01850	0.01310			0.18649			0.71293	0.52097	0.44839	2.05913	1.13483	1.07567	1.70880	0.04469		0.19222	0.32962	0.16867	0.08191			0.04926	0.22787	0.35492	0.35294
						0.05178	0.05923	0.14132	0.04838	0.02616	0.08065			0.14455			0.40905	0.31706	1.45602	2.30356	0.80852	0.67862	1.92520	0.05105		0.23290	0.49462	0.27183	0.08014			0.05141	0.15442	0.50324	0.20001
						0.12169	0.08376	0.10722	0.14830	0.01310	0.32962			0.15800			0.42389	0.34649	1.64924	2.89036	1.15445	1.07703	1.59972	0.06476		0.46756	0.57230	0.17017	0.06865			0.02240	0.14202	0.21924	0.10919
						0.05923	0.05178	0.14050	0.17930	5.651700e-17	0.36209			0.12719			0.43106	1.80000	1.75086	3.08451	1.49636	0.60653	1.24118	0.05105		0.59892	0.58697	0.12973	0.07969			0.01466	0.09081	0.22888	0.10919
						0.07066	0.08376	0.03421	0.17685	0.02267	0.14765			0.22657			0.26058	2.40285	2.22449	3.75936	1.60215	0.34649	1.21699	0.04788		0.41648	0.29134	0.10790	0.05602			0.03483	0.14202	0.44768	0.10919
						0.09908	0.03160	0.01310	0.07742	4.646228e-17	0.08938			0.39233			0.30168	2.48570	0.21651	2.49194	1.42830	0.11706	1.40281	0.03610		0.51788	0.46915	0.17315	0.06488			0.03483	0.09081	0.40000	0.09081
						0.11179	0.01853	0.04469	0.09993	0.06588	0.14132			0.15410			0.23746	2.03961	1.02320	2.81789	1.53594	0.16555	0.89443	0.05560		0.23853	0.16974	0.06320	0.11584			0.12838	0.12842	0.36412	0.21965
						0.02267	0.03160	0.13029	0.04469	0.12101	0.12514			0.19222			0.19150	2.52500	0.66337	3.43598	1.72867	0.32773	1.18652	0.05835		0.33512	0.35147	0.08259	0.13540			0.23483	2.798739e-8	0.28284	0.28284
						9.823253e-17	0.01850	0.03421	0.07066	0.10870	0.11394			0.14054			0.14132	2.10693	0.99007	4.62264	0.28284	0.72184	1.12840	0.03160		0.75112	0.28615	0.03160	0.06705			0.28264	1.275251e-8	0.10028	0.36824
						0.13660	0.03160	0.08844	0.07741	0.04838	0.25280			0.19040			0.17228	0.60571	0.56330	5.12462	0.16555	1.61245	0.71706	0.04469		0.98686	0.34767	0.04469	0.14336			0.29548	0.10918	2.448502e-8	0.32225
						0.07066	0.01310	0.07743	0.10329	0.04470	0.16113			0.08000			0.02247	1.00536	0.82820	5.66039	0.30620	1.20004	1.18652	0.05560		1.19914	0.25477	0.09128	0.20654			0.27921	0.09080	0.27476	0.20000
						0.03662	0.02616	0.04659	0.07085	0.03421	0.05340			0.07066			0.03462	1.47156	1.07567	4.81645	0.25000	1.07703	1.44042	0.02000		1.25537	0.34191	0.12180	0.25337			0.11044	0.09106	0.21147	0.20000
						0.04469	1.318535e-16	0.07089	0.09128	0.03421	0.17637			0.03462			0.46003	0.27592	1.12577	4.60900	0.88358	1.20004	0.38623	0.03462		1.17154	0.06454	0.08259	0.06320			0.01694	0.09080	0.21906	0.10919
						0.04838	0.01310	0.03663	0.19228	0.17176	0.17546			0.03160			0.52567	1.40397	0.80000	3.67696	0.66689	1.07433	3.81873	0.09159		1.01285	0.11244	0.21659	0.12753			0.17876	0.20004	0.21906	0.14202
						0.05461	0.03421	0.04838	0.23290	0.22680	0.13899			0.03160			0.65306	1.51933	0.71162	3.41703	0.43311	0.40000	4.16083	0.11226		0.78643	0.19442	0.28264	0.03483			0.23283	0.10941	0.21906	0.10919
						0.04447	0.02616	0.03160	0.15901	0.22680	0.13029			0.13407			0.84325	0.92450	0.73923	3.36772	0.29484	1.05186	3.72310	0.08252		0.65885	0.12505	0.24680	0.06488			0.24638	0.09075	0.10216	0.10919
						0.07607	0.06585	0.01850	0.11394	0.19986	0.04838			0.09480			0.94350	0.80000	1.47403	2.77849	0.11706	1.13743	3.67981	0.11226		0.35004	0.15164	0.09570	0.17555			0.27014	0.12827	0.10216	0.10919
						0.06562	0.03421	0.03668	0.11394	0.24066	0.20313			0.13029			0.63580	0.68294	1.61640	1.15445	0.40000	1.08611	3.24194	0.07066		0.23005	0.11244	0.21048	0.05141			0.26746	0.09080	0.20023	0.09081
						0.01853	0.02616	0.11762	0.05340	0.08170	0.25772			0.26045			0.47867	0.86054	1.61245	1.50969	0.69290	2.20907	3.23032	0.06476		0.04469	0.15908	0.08170	0.03150			0.41787	0.21966	1.760802e-8	7.176245e-9
						0.02274	0.01853	0.19050	0.12775	0.06320	0.17161			0.30462			0.40296	1.20000	1.55769	0.60570	0.28294	2.33866	3.39339	0.06557		0.03662	0.20515	0.14132	0.03602			0.06320	0.30920	0.13731	0.14202
						0.22197	0.03421	0.13029	0.13407	0.04470	0.14607			0.22773			0.34034	1.32154	0.67862	0.80429	0.42495	3.41703	2.84254	0.10986		0.01850	0.08844	0.14304	0.01986			0.02240	0.12848	0.22100	0.09081
						0.06454	0.02616	0.14072	0.13968	0.03662	0.13029			0.28203			0.24066	1.31967	0.67862	1.59208	0.16555	4.23115	2.28035	0.05560		0.01850	0.07741	0.01850	0.05463			0.03160	1.01949	0.09764	1.424973e-8
						0.15854	0.04838	0.08759	0.08065	0.04469	0.04659			0.56880			0.27467	1.20570	0.08294	3.51626	0.41678	4.96744	2.44634	0.04788		0.03421	2.000041e-16	0.14490	0.03361			0.01466	0.91569	0.13625	0.15442
						0.19986	0.03421	0.01850	0.06320	0.09908	0.10481			0.49028			0.50590	0.21651	0.77021	3.17428	0.66337	4.63081	2.74693	0.04896		0.02616	0.17876	0.13597	0.09563			0.03160	1.00591	0.08861	0.15442
						0.17650	0.08065	0.06715	0.10722	0.01850	0.03421			0.66125			0.33438	0.23174	1.14342	3.42345	0.37487	0.68085	2.60489	6.028264e-17		0.03662	0.21404	0.09993	0.12974			0.02396	1.04122	3.777610e-8	0.13649
						0.03160	0.07066	0.09993	0.05923	0.02267	0.03421			0.74303			0.34307	0.66337	1.80000	2.90620	0.40851	0.84828	2.88021	0.05560		0.04659	0.27313	0.21198	0.07859			0.04469	1.11440	0.14786	0.25737
						0.15808	0.06714	0.09908	0.06714	0.08759	0.07066			0.80007			0.37716	1.55582	2.00998	2.38349	0.32773	0.48294	3.20489	0.01414		0.03661	0.33450	0.39902	0.08386			0.05602	0.20000	3.814658e-8	0.51529
						0.06585	0.05475	0.06714	0.01310	0.03160	0.20438			0.65457			0.46657	2.12132	2.03961	2.49331	0.62115	0.44721	2.04678	0.06476		0.03421	0.44265	0.40239	0.05762			0.05792	0.09081	0.20000	0.75852
						0.08759	0.03206	0.03662	0.05923	0.22787	0.24680			0.63156			0.82158	2.82843	0.68795	2.37612	0.36086	0.71706	1.26800	0.05560		0.03421	0.33949	0.35605	0.01588			0.03483	0.14202	0.09975	0.71496
						0.05340	0.04470	0.08259	0.04469	0.14132	0.22087			0.40220			0.90373	3.16228	0.93447	3.47787	4.29548	0.49001	0.28294	0.06320		0.02267	0.28298	0.36690	0.01477			0.21198	0.28284	0.20000	0.69079
						0.05340	0.03924	0.04659	0.18426	0.19228	0.32743			0.23262			0.90640	1.35367	0.28294	2.99318	6.94748	0.41678	0.53015	0.14455		0.06320	0.23005	0.25701	0.06422			0.19898	0.20000	0.13523	0.52074
						0.03421	0.04136	0.09993	0.17315	0.22164	0.32743			0.04906			1.12178	1.00343	0.28284	3.25576	6.34375	1.61245	0.93814	0.15095		0.03160	0.15281	0.06553	0.07914			0.20758	0.28284	0.22133	0.29081
						0.03160	0.12640	0.01310	0.19005	0.08938	0.36030			0.12447			1.07270	1.51193	0.30620	2.54558	5.97883	1.86366	0.60570	0.20957		0.20355	0.17017	0.09476	0.08408			0.17995	0.15442	0.09764	0.11351
						0.01850	0.17161	0.03421	0.15050	0.04659	0.15800			0.20829			0.89769	1.40281	0.42495	2.37384	6.96563	2.60864	0.51706	0.22787		0.20355	0.21284	0.15594	0.03585			0.07786	0.21838	0.09764	0.23670
						0.05010	0.24041	0.02616	0.09128	0.09480	0.12775			0.17987			0.96649	0.32773	2.07729	1.13137	6.55565	2.20179	0.52274	0.19986		0.23643	0.09659	0.12177	0.11173			0.15457	0.32791	0.09764	0.36608
						0.05010	0.16575	0.06320	0.17746	0.12973	0.07066			0.11033			1.11489	0.81715	2.52982	1.16619	4.47214	1.24866	0.22413	0.16113		0.22120	0.02267	0.20892	0.04926			0.12838	0.41464	0.10238	0.44118
						0.01310	0.05474	0.04659	0.11394	0.14773	0.04469			0.08000			1.01467	1.28369	2.54558	0.89443	5.29528	0.21651	0.27536	0.11360		0.20515	0.11854	0.11508	0.03585			0.12753	0.21965	0.14813	0.44721
						0.07085	0.05475	0.04469	0.05178	0.12172	0.09993			0.04574			1.09022	1.88562	2.98878	0.52271	5.37691	1.37398	0.48482	0.12595		0.01853	0.07851	0.09313	0.01694			0.09491	0.29081	0.14813	0.32791
						0.03662	0.04659	0.08376	0.02267	0.14132	0.29134			0.04574			1.24956	1.77984	2.50428	1.03645	4.88703	2.46440	2.05155	0.14162		0.00000	0.06320	0.17752	0.05602			0.17017	4.006086e-8	0.20023	0.22787
						0.03662	0.12708	0.03160	0.04469	0.06454	0.27487			0.07066			1.25209	4.11825	2.71105	0.66337	6.75734	1.63946	2.43327	0.08066		0.03661	0.12640	0.13402	0.13540			0.04626	0.20000	0.22590	0.21965
						0.04469	0.04469	0.05475	0.10481	0.15800	0.36030			0.11816			1.16961	6.00371	0.19599	0.40000	6.18465	1.74022	1.15234	0.07802		0.03661	0.05039	0.18960	0.03585			0.07786	0.29081	0.20000	0.28284
						0.07066	0.03662	0.04470	0.01853	0.17971	0.49653			0.04788			0.89824	6.95984	0.61292	0.55972	4.80000	1.84391	2.11869	0.09639		0.05340	0.13597	0.14304	0.03160			0.05141	0.36824	0.09945	0.32791
						0.01853	0.05475	0.05475	0.06585	0.12708	0.35707			0.03462			0.83793	2.67379	0.19995	0.48294	4.80143	1.32154	1.95137	0.06557		0.05474	0.14304	0.12388	0.04926			0.08015	0.73686	0.20000	0.36824
						0.08259	0.03160	0.05178	0.09908	0.12775	0.28470			0.03160			0.40361	1.23780	0.67858	0.44721	4.64863	1.38073	1.55582	0.13559		0.03661	0.08065	0.09908	0.28138			0.09990	1.01980	0.14828	0.29081
						0.19561	0.03421	0.03662	0.07066	0.10722	0.34903			0.04906			0.23104	0.77021	1.45600	0.62708	3.86670	1.32741	2.20311	0.13029		0.06585	0.04659	0.16619	0.20496			0.12830	1.81145	0.10080	0.41018
						0.15800	0.13029	0.03421	4.137160e-18	0.03662	0.41201			0.04906			0.11033	0.72656	1.09574	1.05186	6.02323	0.71162	1.29882	0.06476		0.09126	0.03662	0.09993	0.19242			0.09630	1.72085	0.10080	0.21965
						0.23441	0.19611	0.03662	2.631229e-18	0.21273	0.50659			0.07066			0.33061	2.44811	0.73062	2.05084	6.56350	1.12577	2.48570	0.16113		0.08259	0.13652	0.04469	0.26002			0.04626	1.20000	0.10081	0.20000
						0.19228	0.09480	0.01310	0.05475	0.37869	0.64980			0.03160			0.36506	0.77086	1.18424	2.62652	6.68095	0.93862	0.72111	0.01746		0.13412	0.15261	0.03421	0.21893			0.05789	0.54706	1.326805e-4	0.20000
						0.16113	0.06320	0.19986	0.03160	0.42981	0.69789			0.07066			0.39547	0.14347	0.52271	1.48982	7.22772	1.41421	2.32002	0.08986		0.18230	0.06454	0.08938	0.08613			0.03579	0.67498	0.14582	0.15442
						0.08259	0.07851	0.30370	0.03662	0.38743	0.73536			0.03160			0.36506	0.31706	1.59972	1.37398	7.35989	1.11051	5.00000	0.14681		0.20049	0.10790	0.07066	0.03483			0.02219	0.31063	0.10079	0.10919
						0.07741	0.02267	0.38051	0.05475	0.20515	0.81949			0.06320			0.39087	0.77021	1.55769	0.86054	8.07292	1.06066	7.10547	0.09272		0.10251	0.16031	0.07066	0.03483			0.01694	0.36824	0.14582	0.09081
						0.19222	0.09570	0.40220	0.11394	0.03160	0.36860			0.06320			0.27432	0.68294	2.37405	0.51042	8.73178	0.74536	7.49667	0.12235		0.06189	0.08065	0.23694	0.06488			0.07066	0.31063	0.14582	0.14202
						0.02267	0.03662	0.36690	0.24066	0.12507	0.23095			0.05560			0.32743	0.60000	2.37056	0.40000	9.12692	1.13829	9.43118	0.13404		0.20437	0.25029	0.35254	0.03160			0.05792	0.43726	0.11146	0.28284
						0.14012	0.03160	0.16575	0.17546	0.16213	0.19222			0.10674			0.34871	0.23174	2.35134	0.88404	9.75295	1.45774	7.63058	0.04470		0.25477	0.27197	0.38573	0.01466			0.04469	0.49454	0.09638	0.20000
						0.17017	0.03160	0.05475	0.17017	0.17637	0.20355			0.08986			0.40516	0.52367	2.02502	1.26491	8.95545	2.34094	4.95080	0.08257		0.34925	0.23694	0.34588	0.02240			0.05071	0.28284	0.22784	0.21965
						0.06454	0.04469	0.05475	0.09908	0.12180	0.42368			3.192606e-17			0.41581	0.44721	0.80852	1.81108	7.16938	1.80191	2.99954	0.08184		0.34249	0.03206	0.45507	0.01694			0.05141	0.30466	0.22025	0.14202
						0.11680	0.11680	0.08844	0.05178	0.04469	0.36679			0.10247			0.15713	0.11706	0.29484	1.60000	5.08495	2.89524	2.04678	0.10669		0.34592	0.09495	0.32534	0.03160			0.06488	0.30466	0.20133	0.22787
						0.23290	0.07085	0.14132	0.08259	0.03421	0.23825			0.12447			0.14780	1.02320	0.41674	1.79432	4.72904	4.22097	0.95972	0.09993		0.13660	0.06343	0.26567	0.05602			0.02073	0.69081	0.35102	0.14202
						0.07085	0.03662	0.20034	0.07066	0.05010	0.30930			0.08000			0.27792	0.84856	1.81887	2.16405	3.25960	4.71087	0.92081	0.03625		0.11405	0.09313	0.15901	0.20669			0.06705	0.21965	0.28205	0.14202
						0.05010	0.04659	0.13660	0.05178	0.06454	0.37869			0.10381			0.21332	0.82462	1.37080	0.38623	3.46215	3.65208	3.45254	0.04958		0.07066	0.10481	0.11104	0.05141			0.04854	0.30466	0.56506	0.21965
						0.12640	0.04838	0.12514	0.08970	0.04469	0.45574			0.18426			0.28264	0.80852	1.12318	0.25000	3.70455	3.17783	5.00400	0.15789		0.65602	0.03662	0.05927	0.07066			0.05141	0.40000	0.35822	0.35294
						0.11405	0.05010	0.03421	0.17033	0.03421	0.33519			0.33330			0.36528	0.80852	1.50358	0.40000	3.63819	3.48867	6.70243	0.12241		0.53805	0.13029	0.01927	0.13029			0.08191	0.40000	0.22373	0.44118
						0.07066	0.02267	0.10722	0.04470	0.06585	0.44047			0.39657			0.31758	0.40851	1.82642	0.28284	3.36034	3.52151	9.38675	0.13608		0.68648	0.14765	0.10329	0.10206			0.06705	0.28284	0.09958	0.37978
						0.18968	0.04469	0.22787	0.12786	0.04471	0.45809			0.47301			0.22034	0.17933	1.25491	0.51042	1.72867	4.17612	3.54398	0.16541		0.39274	0.27756	0.09993	0.27548			0.04854	0.51723	0.13670	0.33333
						0.15854	0.11394	0.09665	0.03662	0.02616	0.56372			0.35787			0.01746	0.33333	1.41050	0.40000	2.30040	4.69999	4.03103	0.07929		0.56771	0.31337	0.03421	0.10548			0.04816	0.50281	0.10319	0.19303
						0.14830	0.10791	0.06689	0.04469	0.05475	0.63985			0.26900			0.01414	1.77918	1.40489	0.60653	1.64924	5.74846	3.21240	0.40292		0.07741	0.37194	0.07066	0.11394			0.02434	0.21965	0.13333	0.20000
						0.14649	0.07066	0.02610	0.04838	0.01853	0.90244			0.19559			0.08066	1.33439	1.48294	0.20000	0.71706	7.11755	2.52262	0.50745		0.14490	0.41299	0.04470	0.09630			0.03839	0.36824	0.09686	0.20000
						0.12775	0.01853	0.03657	0.06320	0.01311	1.01684			0.12008			0.13088	1.20570	1.11706	0.61131	1.21699	7.73437	1.81688	0.39959		0.16420	0.15050	0.05474	0.23174			0.03845	0.58008	4.858384e-5	0.21965
						0.06454	0.05010	0.07736	0.06454	0.01313	1.02804			0.03542			0.06707	1.48096	1.11051	0.51042	2.60000	7.20000	1.29587	0.43066		0.40220	0.30418	0.14607	0.03483			0.04658	0.22787	0.10061	0.21965
						0.06585	0.01850	0.09570	0.02267	0.02616	0.96973			0.04567			0.06937	1.52315	0.85660	0.51042	1.93757	6.28013	1.15006	0.47335		0.14363	0.43046	0.22680	0.07066			4.069702e-5	0.35294	0.10058	0.10919
						0.13597	0.07742	0.12780	0.03160	0.03160	0.81665			0.08977			0.10247	2.05748	0.83644	0.61131	1.82745	5.91346	0.78734	0.23545		0.02616	0.51441	0.24487	0.10650			0.06299	0.28284	0.22498	0.29081
						0.10484	0.11330	0.05009	0.07742	0.03160	0.64860			0.15205			0.08000	2.08806	0.52271	1.23290	2.70416	4.76545	0.80160	0.20604		0.14765	0.11394	0.13029	0.20584			0.01471	0.09081	0.22500	0.50919
						0.13407	0.08274	0.08938	0.09128	0.02269	0.56876			0.09920			0.10247	2.95296	0.74443	1.08611	1.79505	4.63793	0.80001	0.26386		0.19442	0.41228	0.08376	0.11394			0.03591	0.12842	0.20040	0.32225
						0.17650	0.10329	0.30922	0.11762	0.04470	0.56011			0.04303			0.08000	0.90531	0.60653	0.88294	0.47140	6.16417	1.94293	0.32533		0.03160	0.21815	3.081023e-16	0.03705			1.364687e-4	0.20305	0.10018	0.49081
						0.04469	0.08376	0.10719	0.13407	0.04469	0.55438			0.08572			0.05560	0.73922	0.80852	0.68294	0.51063	6.34636	2.07317	0.31020		0.17315	0.19222	0.08066	0.07954			0.08147	0.10919	0.20000	0.21965
						0.17930	0.08259	0.05010	0.13407	0.03421	0.69455			0.08572			0.07066	0.80000	0.93498	0.62708	0.60570	6.80109	2.86320	0.46090		0.18825	0.26152	0.05341	0.02225			0.07066	0.20305	0.10289	0.00000
						0.19007	5.735300e-17	0.14649	0.14773	0.05923	0.73005			0.13465			0.12235	0.93862	0.93862	0.96932	0.72184	9.17121	4.39109	0.44911		0.52595	0.18426	0.11897	0.24715			0.03582	0.09081	0.10289	0.10919
						0.09570	0.06454	0.08170	0.14765	0.11330	0.74164			0.11785			0.03462	1.50969	0.83644	0.80852	0.74443	6.20887	5.16459	0.49358		0.68215	0.13029	0.09583	0.06349			0.05136	0.14202	0.10288	0.20000
						0.12640	0.04469	0.05164	0.13216	0.11104	0.72009			0.09990			0.03462	0.77086	0.72111	0.60653	0.90531	6.56220	4.67857	0.46520		0.65407	0.26058	0.13407	0.03168			0.28027	0.21965	0.10289	1.678718e-8
						0.03661	2.192690e-18	0.04665	0.16575	0.15050	0.61981			0.02461			0.03610	0.62708	1.00000	0.75295	1.00000	6.16797	5.39026	0.60784		0.47418	0.28260	0.14132	0.05634			0.19352	0.10919	0.14988	0.14202
						0.06320	0.02616	0.06454	0.16113	0.11244	0.69609			0.01744			0.03462	0.89066	0.60571	0.93862	0.80429	5.63291	5.78872	0.46835		0.49653	0.42651	0.06715	0.14999			0.17995	0.10919	7.603866e-9	0.20000
						0.05340	0.06585	0.11762	0.10790	0.18960	0.61356			0.09480			0.05835	0.79146	0.71706	0.72656	0.72111	5.04574	5.44087	0.47907		0.14773	0.58779	0.02676	0.11282			0.14132	0.20000	2.188958e-9	0.29081
						0.06714	0.06320	0.09993	0.13029	0.09583	0.69520			0.03462			0.03160	0.11706	0.23174	0.56569	0.44721	3.55668	5.99333	0.41782		0.17017	0.18426	0.11342	0.11468			0.15800	3.748066e-8	6.672147e-10	0.15442
						0.03160	0.11405	0.09570	0.11405	0.05010	0.58205			0.09585			0.03610	0.56569	0.28294	1.00343	0.20000	2.12512	6.27997	0.30293		0.26058	0.30028	0.13170	0.06599			0.14654	0.14202	0.09694	0.20000
						0.04470	0.10948	0.03160	0.13029	0.30930	0.70554			0.01414			0.03610	0.40000	0.72184	0.63246	0.75817	1.54099	5.78872	0.19943		0.14132	0.26877	0.21284	0.05392			0.03585	0.21965	0.09694	0.22787
						1.512956e-16	0.05928	0.05475	0.12775	0.05010	0.76552			0.01736			0.04896	0.92716	0.93447	0.60000	1.13104	0.86453	5.79741	0.14132		0.15050	0.51441	0.29750	0.02400			0.03585	2.903532e-9	0.09694	0.12842
						0.01310	0.01849	0.05475	0.15164	0.12180	0.70352			0.01414			0.05835	1.44222	1.17327	0.57772	0.80490	0.63246	5.58817	0.04917		0.29197	0.58593	0.33512	0.01481			0.07033	0.09081	0.09694	0.20000
						0.07741	0.11393	0.05010	0.15331	0.14773	0.48497			0.04788			0.07734	1.97990	1.59953	0.61131	0.43311	0.63246	0.86177	0.03462		0.11897	0.56462	0.44047	0.11226			0.13042	0.14202	0.13325	0.31063
						0.06714	0.14772	0.03662	0.20234	0.11405	0.41170			0.03324			0.12640	2.50599	0.56330	0.53015	0.14347	0.93447	0.53119	0.04906		0.44912	0.44362	0.33591	0.10268			0.17941	0.14202	0.10819	0.30466
						0.09570	0.09992	0.03662	0.15800	0.48663	0.21173			0.12251			0.01414	2.84253	1.15563	0.40851	0.57772	0.62708	0.62708	0.04896		0.40157	0.33436	0.23441	0.12054			0.14627	0.14202	0.10819	0.41464
						0.06454	0.11897	0.06322	0.14132	0.36030	0.10854			0.11440			0.13837	1.90764	0.41678	0.46859	0.57772	1.20570	0.67862	0.05835		0.37981	0.13029	0.21048	0.13607			0.13219	0.14202	0.32899	0.36824
						0.02930	0.12505	0.11394	0.09313	0.37455	0.14649			0.23397			0.23601	1.35469	0.40000	0.56330	1.81435	1.60428	0.51042	0.03160		0.30526	0.09570	0.24487	0.11505			0.06346	1.624851e-8	0.36952	0.30466
						0.01927	0.04838	0.08274	0.05475	0.10481	0.01310			0.28029			0.13029	1.17327	0.60571	0.47156	3.05319	2.91941	0.49692	0.05835		0.36447	0.09659	0.05923	0.03584			0.05045	0.09081	0.42460	0.28483
						0.03160	0.05474	0.06714	0.03160	0.02616	0.31600			0.25212			0.16449	0.62479	0.41678	0.65459	4.59384	2.89036	0.28284	0.09993		0.37943	0.08938	0.08759	0.05792			0.11858	0.14202	0.35394	0.33333
						0.08065	0.09313	0.03421	8.944452e-18	0.22567	0.11394			0.26881			0.15713	1.61721	0.37487	1.33216	6.44050	4.24093	0.23174	0.01414		0.22567	0.15164	0.12708	0.03483			0.11457	0.09081	0.35394	2.915338e-9
						0.08274	0.04470	0.04470	0.08938	0.34181	0.11244			0.28615			0.06937	1.45774	1.95137	1.62482	6.69773	3.29717	0.28284	0.04469		0.22345	0.42160	0.10948	0.04926			0.09390	0.09081	0.34739	7.258802e-9
						0.10722	0.05010	0.11394	0.25903	0.20234	0.14765			0.14886			0.18338	1.07703	2.23607	2.10207	4.53614	3.54401	0.31706	0.13823		0.15901	0.23005	0.10949	0.14455			0.06488	0.10919	0.27598	0.09081
						0.07630	0.06585	0.11405	0.33519	0.15854	0.07741			0.15800			0.23005	1.16619	2.12100	2.46735	5.11077	4.23196	0.48995	0.11344		0.08844	0.08065	0.13534	0.09480			0.04469	0.09081	0.40132	0.12842
						0.03421	0.06454	0.05475	0.31282	0.29446	0.31282			0.20604			0.28860	1.13482	4.88053	2.48980	4.38594	4.56946	0.96784	0.05207		0.28230	0.06320	0.14600	0.17935			0.01466	0.10919	0.44768	0.10919
						0.03160	0.16113	0.19228	0.31282	0.18960	0.17017			0.09480			0.29978	0.55972	6.55805	1.44729	4.10734	4.78484	0.48294	0.06476		0.14765	0.07066	0.17829	0.08491			0.02240	0.12842	0.42429	0.09081
						0.07066	0.19222	0.22164	0.22787	0.20758	0.15050			0.19943			0.44451	0.60571	5.13962	0.67862	2.67481	4.96849	0.41678	0.04896		0.07741	0.09993	0.23573	0.23948			0.03585	0.28284	0.41222	0.28284
						0.13597	0.19986	0.19050	0.17546	0.20270	0.14823			0.17592			0.46657	1.07703	6.76449	0.66337	2.30523	5.34983	0.14347	0.02247		0.09570	0.21815	0.19005	0.17614			0.04469	0.28284	0.30942	0.28284
						0.23853	0.16376	0.22159	0.15808	0.10722	0.28260			0.23005			0.56968	1.21697	6.32498	1.00050	1.98703	4.21637	0.11729	0.06320		0.07630	0.29138	0.18240	0.15642			0.03160	0.22787	0.31193	0.22787
						0.27495	0.12640	0.20892	0.18426	0.07742	0.34837			0.23577			0.62613	1.49243	2.53396	2.40000	0.93862	0.57748	1.16428	0.03610		0.11394	0.24680	0.20034	0.14182			0.04626	0.30466	0.13995	0.41126
						0.14132	0.03662	0.05010	0.19449	0.28789	0.47955			0.28615			0.63514	2.31706	0.60000	2.31855	1.07703	0.96358	0.31710	0.06557		0.03160	0.25357	0.13534	0.39512			0.04854	0.31063	0.14185	0.36824
						0.23539	0.07066	0.05010	0.14132	0.35240	0.35330			0.28346			0.44541	1.93783	0.80000	2.53620	0.68795	0.93498	0.56569	0.04905		0.05475	0.25357	0.13407	0.29978			0.02396	0.09081	0.40302	0.21965
						0.08759	0.05178	0.06454	0.10948	0.29767	0.10329			0.32991			0.35184	2.30356	1.54530	2.05748	0.23174	1.52315	0.34649	0.02469		0.17698	0.08759	0.17315	0.24304			0.12753	0.12842	0.51881	0.09081
						0.06454	0.07741	0.08170	0.04470	0.20234	0.06454			0.37779			0.33535	2.05084	0.88414	0.93498	0.44721	2.78568	0.82462	0.02469		0.39339	0.15800	0.16575	0.23586			0.03160	9.679877e-7	0.19994	0.14202
						0.10870	0.12180	0.07630	0.07741	0.20114	0.25772			0.34668			0.23977	1.64720	0.18685	0.48995	0.71162	3.12410	0.27064	0.10674		0.27183	0.11244	0.09480	0.03160			0.01466	4.148505e-6	0.59712	0.20000
						0.15315	0.07741	0.11394	0.14549	0.09583	0.12514			0.37156			0.22787	0.60000	0.30346	0.60571	0.51042	2.98567	1.23172	0.09639		0.43018	0.23853	0.10481	0.17553			0.01466	0.09099	0.44700	0.20000
						0.13029	0.08938	0.12505	0.11762	0.05340	0.53989			0.23553			0.31871	1.40000	0.28631	2.26879	0.32773	3.37295	1.94021	0.19905		0.55954	0.21233	0.09659	0.18095			0.03386	0.20000	0.51223	0.12842
						0.15050	0.09908	0.14830	0.15854	0.08170	0.52116			0.16905			0.33330	0.91706	0.50577	1.13483	0.51706	3.48264	2.32597	0.22034		0.44689	0.22120	0.09659	0.19111			0.14106	0.01839	0.56838	0.21965
						0.08065	0.08065	0.07742	0.17930	0.03662	0.56379			0.16042			0.61356	0.66337	2.13437	2.11339	0.55902	2.50971	2.23520	0.17017		0.16420	0.20234	0.03421	0.15800			0.04311	0.12835	0.62370	0.30466
						0.03421	0.09908	0.10722	0.14490	0.12169	0.52789			0.07802			0.89935	1.35684	1.56083	1.48982	0.74732	0.72111	2.49901	0.16333		0.19222	0.37507	0.03421	0.15666			0.01466	0.35286	0.65809	0.28284
						0.13407	0.10870	0.05923	0.04469	0.14490	0.75396			0.16204			1.11140	0.44721	1.67889	1.56205	1.30672	0.56569	1.60428	0.05105		0.20234	0.18747	0.01850	0.08403			0.01466	0.29089	1.16628	0.22787
						0.02267	0.06585	0.01850	0.06714	0.08170	0.45668			1.295730e-16			1.41947	0.99024	1.56205	2.34094	1.34291	0.60000	1.48096	0.07734		0.15315	0.29134	0.02267	0.06705			0.01466	0.49454	0.76257	0.32791
						0.01850	0.15800	0.07085	0.03662	0.15800	0.51788			0.08252			1.59743	1.14633	1.19146	1.44222	0.71706	0.72184	0.83644	0.03462		0.11897	0.45987	0.03160	0.11011			0.05141	0.41464	0.36381	0.44721
						0.06227	0.18747	0.04838	2.689423e-17	0.16113	0.55152			0.10674			1.53228	0.23911	0.48995	1.88396	1.09590	2.03961	0.29484	0.09993		0.14765	0.26128	0.17930	0.30556			0.02240	0.21838	0.42536	0.32791
						0.03206	0.25539	0.08759	0.07066	0.20270	0.54539			0.13559			1.18754	0.50000	0.56569	2.66833	0.14347	3.92938	0.44721	0.05207		0.16974	0.47819	0.27130	0.41324			0.01694	0.22787	0.42174	0.20000
						0.05010	0.09480	0.01853	0.04838	0.10722	0.40513			0.15800			0.90393	0.50000	0.66337	1.60215	1.04906	5.05744	0.88404	0.14491		0.04659	0.36849	0.31758	0.17349			0.03483	0.36368	0.71173	0.14202
						0.07066	0.21709	0.03160	2.982059e-17	0.56177	0.34925			0.21332			0.59304	0.47156	0.20000	1.76058	1.16619	4.39056	0.82462	0.12251		0.10329	0.22492	0.28470	0.09630			0.00000	0.27016	0.61944	0.21965
						0.07066	0.18735	0.04838	0.01310	0.14773	0.36202			0.21357			0.31600	0.25000	0.20000	2.23039	0.77086	2.31771	0.91706	0.19504		0.08259	0.16940	0.25280	0.08147			0.04854	0.32216	1.00040	0.36351
						0.01310	0.27487	0.05010	0.10481	0.48484	0.28260			0.21649			0.09480	0.21641	0.11706	2.46420	0.33798	1.03926	1.00050	0.03462		0.08259	0.19611	0.12775	0.26358			0.01694	0.49495	1.09450	0.37978
						0.11897	0.14132	0.07066	0.03160	0.45965	0.34468			0.20945			0.15788	0.11705	0.30620	1.44222	0.34649	0.29484	1.61245	0.10894		0.12640	0.27390	0.07066	0.29134			0.01466	0.40060	1.21844	0.23670
						0.08938	0.19228	0.08065	5.118887e-17	0.36948	0.12169			0.14125			0.31723	0.60005	0.48995	1.53815	0.21651	0.30620	1.52315	0.03160		0.09570	0.15800	0.07066	0.18354			0.02073	0.32820	1.02131	0.35355
						0.10722	0.17930	0.09659	0.03421	0.27418	0.02616			0.09585			0.46657	0.33798	0.48995	1.66667	0.44721	0.88404	1.64720	0.03462		0.11394	0.12973	0.08376	0.19861			0.03386	0.50625	1.02131	0.21965
						0.06454	0.14490	0.06585	0.07742	0.27290	0.07066			0.06557			0.57356	0.44722	0.95255	0.94281	0.70711	0.71706	1.91658	0.02000		0.07741	0.12514	0.07066	0.17458			0.02240	0.64655	0.20043	0.28284
						0.10481	0.07552	0.03160	0.10722	0.18562	0.04659			0.03160			0.62459	0.49007	0.70752	0.50000	0.87119	0.41678	2.72265	0.12251		0.10329	0.11394	0.06454	0.11452			0.01466	0.52039	0.12702	0.42446
						0.05340	0.14830	0.02616	0.08938	0.06585	0.16619			0.06320			0.71100	0.19998	0.49001	0.30620	3.20867	1.21655	2.88394	0.11344		0.03421	0.06454	0.09659	0.14383			0.01694	0.22773	0.10247	0.21965
						0.07742	0.06454	0.08065	0.11480	0.18747	0.07066			0.07863			0.76273	0.39990	0.75295	0.21651	2.69258	2.86356	2.89207	0.14748		0.01850	0.07630	0.09313	0.14484			2.667524e-17	0.22784	0.19732	5.807065e-9
						0.05923	0.03160	0.07066	0.18066	0.09128	0.11405			0.06476				0.30597	0.44721	0.11706	2.50599	2.20291	2.86375	0.06730		0.02267	0.08259	0.07851	0.17717			0.01694	0.14216	0.29617	0.28284
						0.08376	0.01853	0.04838	0.21198	0.07066	0.08187			0.25783				0.34564	0.56569	0.40000	2.23607	2.20291	2.88343	0.04925		0.03662	0.03160	0.03160	0.02407			4.385381e-18	1.574227e-4	0.20796	0.20000
						0.04470	2.806644e-17	0.13029	0.16420	0.09993	0.10105			0.29621				0.19998	0.28284	0.28294	2.41804	2.36686	2.64272	0.06600		0.05010	0.04838	0.07066	0.06191			0.01466	0.09080	0.28202	0.21965
						0.01850	3.069767e-17	0.14304	0.14765	0.06585	0.11405			0.18426				0.14351	0.40851	0.16555	2.40832	1.60276	4.02768	0.05081		0.03662	0.05340	0.14132	0.04573			0.01466	0.10883	0.22529	0.21965
						0.04469	0.01310	0.08844	0.08759	0.25776	0.03421			0.05560				0.30625	0.23174	0.40000	2.60489	0.80429	4.16083	0.02239		0.07066	0.07066	0.22787	0.06150			0.02240	6.332247e-5	0.09951	0.20000
						0.03419	0.03160	0.16113	0.05475	0.49056	0.08065			0.01414				0.14422	0.16555	0.40851	2.66288	0.23174	3.68386	0.04846		0.05340	0.01853	0.22345	0.04920			0.02396	0.15434	1.011708e-4	0.22787
						0.08753	2.436946e-17	0.18747	0.05182	0.46552	0.10481			0.20372				0.32721	0.11729	0.40013	3.11567	0.56569	2.76849	0.08270		0.05475	0.05475	0.17400	0.07034			0.02240	0.12844	0.22443	0.22787
						0.08045	0.01850	0.17924	0.03421	0.42160	0.13407			0.25212				0.72118	1.11624	0.28294	2.32991	0.58941	2.60263	0.05261		0.06714	0.04470	0.28705	0.07611			0.02240	0.14200	0.28299	0.30919
						0.03661	0.01310	0.09128	0.06320	0.44893	0.34041			0.12235				1.04890	1.66751	0.34649	2.40370	0.49692	2.48570	0.09993		0.04838	0.04470	0.23888	0.07931			0.01694	0.09081	0.35814	0.20000
						0.03160	0.03160	0.08170	0.02616	0.41201	0.38051			0.13559				1.13475	2.48304	0.40000	2.68730	0.74443	1.95762	0.12714		0.04838	0.03160	0.08759	0.03585			0.01694	0.20000	0.36125	0.30919
						0.16370	0.02267	0.03160	0.03421	0.07741	0.22680			0.21146				1.72783	0.87279	0.21651	2.76565	0.77021	1.13483	0.14386		0.01310	0.04838	0.03662	0.03585			0.01469	0.12842	0.42609	0.29081
						0.03526	0.02267	0.09659	0.03662	0.16113	0.17017			0.22034				2.42062	2.75056	0.08294	2.17322	1.21095	1.03645	0.12715		0.14830	0.03160	0.16113	0.01694			0.02398	0.22787	0.22412	0.20000
						0.05740	0.04469	0.18393	0.03160	0.13950	0.15901			0.21867				2.55771	3.02477	0.11729	1.00072	1.96977	0.51706	0.09482		0.16420	0.02616	0.07063	0.02240			0.03490	0.14202	0.21865	0.21965
						0.04630	0.04659	0.13914	1.316345e-17	0.15908	0.06454			0.15800				2.29081	2.99188	0.08294	1.11999	1.89428	0.44721	0.06557		0.20229	0.02616	0.06585	0.01466			7.931280e-5	0.14202	0.21865	0.30466
						0.04480	0.03662	0.08146	0.04838	0.15800	0.03421			0.03610				2.89207	3.52471	0.40013	0.79050	2.05913	0.28294	0.03160		0.24917	0.08759	0.12388	0.03788			7.931280e-5	0.30919	0.22308	0.35294
						0.06993	0.05340	0.11232	0.03662	0.15315	0.28615			0.06320				2.93296	3.84708	0.28284	1.99146	2.78848	0.21651	0.07863		0.18347	0.11762	0.08376	0.05920			0.01691	0.20000	0.13998	0.32225
						0.14762	0.03662	0.05923	0.05923	0.13029	0.35316			0.15199				2.69400	4.01547	0.44721	2.02276	2.65640	0.23174	0.02469		0.05475	0.12169	0.08259	0.05141			9.216459e-5	0.15442	0.13998	0.32225
						0.20069	0.01850	0.06441	0.08759	0.19611	0.34034			0.15896				2.68742	3.67151	0.28284	2.58892	1.82651	0.33798	0.06557		0.04470	0.11179	0.17876	0.03160			0.01465	0.09081	1.350500e-6	0.20000
						0.15773	0.02267	0.07725	0.07066	0.19222	0.34034			0.20374				2.30489	3.87336	0.32773	1.47156	2.02759	0.42495	0.06557		0.01850	0.15315	0.08835	0.06543			0.05596	0.10919	0.14286	0.21965
						0.17612	0.03160	0.04839	0.04469	0.16420	0.34592			0.20829				1.18652	4.47214	0.41678	1.01065	1.86228	0.44721	0.05207		0.04469	0.30370	0.19225	0.03585			0.03579	0.36824	0.14286	0.20000
						0.14132	0.01310	0.07069	0.05475	0.03662	0.28264			0.25752				1.03645	3.81845	0.40851	0.80852	1.89893	0.44721	0.07734		0.17210	0.37194	0.14756	0.01694			1.490791e-5	0.10919	0.31770	0.20000
						0.10790	0.25772	0.01301	0.02267	0.11405	0.19133			0.27832				0.28284	2.40388	0.28968	1.08925	2.13589	0.44721	0.04574		0.24789	0.28264	0.12161	0.01694			0.04842	0.20000	0.28284	0.30466
						0.04470	0.27161	0.06318	0.01850	0.07741	0.21077			0.26714				0.63246	1.96088	0.74536	0.82108	0.93862	0.90230	0.07734		0.39736	0.23863	0.07060	0.00000			2.436466e-5	0.14202	0.28285	0.40000
						0.05010	0.27161	0.10719	0.01310	0.09993	0.14830			0.26386				1.00000	1.39726	2.82463	0.51042	1.55769	1.36847	0.11033		0.32226	0.15050	0.04469	0.03483			0.03950	0.10919	0.13999	0.21965
						0.09480	0.30290	0.20022	3.453331e-17	0.13597	0.14363			0.19222				0.31706	0.74443	3.35410	0.48995	1.93783	0.13823	0.13029		0.29808	0.06320	0.03421	0.02240			0.03734	0.14202	0.21752	0.41018
						0.06714	0.30454	0.20681	0.03421	0.34041	0.11480			0.15863				0.93862	0.53015	3.97567	0.61244	3.25576	0.28968	0.15896		0.25672	0.09570	0.04470	0.03386				0.12842	0.14184	0.30466
						0.06320	0.03662	0.20228	0.03421	0.39087	0.15331			0.14386				0.33798	0.71706	3.97395	0.51033	4.45082	0.28284	0.11662		0.26406	0.08259	0.04469	0.02396				0.20084	0.08897	0.25000
						0.10870	0.01853	0.14770	0.02616	0.53498	0.09908			0.11360				0.40851	0.73923	5.38856	1.55829	6.20574	0.11729	0.12122		0.37659	0.05923	0.03421	0.03692				0.41126	0.14286	0.21404
						0.03662	0.01853	0.09910	0.03160	0.25701	0.19133			0.07066				0.00000	0.80429	4.97092	1.70969	6.04746	0.28284	0.12251		0.50953	0.05923	0.05178	0.05141				0.49453	0.10097	0.51773
						0.01853	0.03421	0.07632	0.02616	0.09993	0.13968			0.03610				0.08294	0.86054	2.75861	1.70969	6.51401	1.52315	0.09993		0.28874	0.01850	0.04470	0.05792				0.41123	0.21238	0.50000
						0.06454	0.06715	0.02646	0.03160	0.27856	0.12973			0.03462				0.14347	1.11051	2.11847	2.27958	6.18692	0.82108	0.08252		0.23005	0.07066	0.03160	0.05602				0.36823	0.23138	0.22788
						0.03160	0.03421	0.05354	1.315614e-17	0.41201	0.09993			0.20234				0.20000	2.03103	2.41662	2.00477	7.39927	0.67862	0.13029		0.21815	0.05340	0.01310	0.02240				0.50281	0.19374	0.15442
						0.03421	0.03661	0.02938	0.16575	0.50594	0.13029			0.26927				0.30620	1.05409	2.33427	2.30489	7.16762	0.75295	0.12719		0.42508	0.24789	0.03421	0.02073				0.28284	0.28449	0.22787
						0.14132	0.05339	0.03678	0.14830	0.21855	0.25903			0.13559				0.23174	1.92056	2.51843	1.82210	7.08133	0.44721	0.09639		0.78118	0.30028	0.05178	0.01694				0.15417	0.28331	0.21965
						0.06585	0.07742	0.01867	0.16642	0.29811	0.17315			0.01746				0.60579	1.45774	2.97813	2.12100	8.09553	1.00000	0.12640		0.69304	0.29013	0.10871	0.01466				3.959660e-5	0.21976	0.32791
						0.03421	0.07742	0.11507	0.05923	0.22345	0.14363			0.04469				0.11729	1.00050	3.49285	2.53122	8.26801	0.40851	0.09159		0.58190	0.14773	0.09570	0.06865				0.10922	0.28403	0.14202
						0.04469	0.05178	0.10499	0.03662	0.32339	0.10329			0.25783				0.40851	1.44222	3.28902	2.48739	8.22922	0.74443	0.07802		0.65983	0.09993	0.06318	0.01694				0.52983	0.22922	3.364297e-6
						0.01850	0.05340	0.08762	0.06585	0.37988	0.06320			0.34924				0.08294	0.70752	2.81789	3.04575	8.42749	0.34649	0.08938		0.21438	0.07630	0.30942	0.02300				0.60644	0.10110	7.109227e-6
						0.07553	0.06585	0.02267	0.07066	0.41648	0.02267			0.21624				0.42495	0.37487	2.50000	1.77038	7.83351	0.41678	0.06707		0.12973	0.12708	0.35046	0.02939				0.29033	0.22183	0.09081
						0.08169	0.15050	0.05010	0.09659	0.30370	0.03421			0.03462				0.44730	1.20286	2.66667	1.96088	7.00522	0.11706	0.06866		0.25539	0.19480	0.23003	0.05572				0.60577	0.08834	0.09081
						0.09993	0.21736	0.07089	0.03160	0.45244	0.07741			0.22588				0.74443	1.41421	1.20185	1.81673	6.66667	0.10367	0.14419		0.86251	0.48613	0.27329	0.06600				0.41447	0.19997	0.21965
						0.08274	0.24800	0.06585	0.01853	0.29811	0.04469			0.41316				0.31706	1.16619	0.61244	2.23975	0.57748	1.49071	0.12646		0.82776	0.52254	0.25277	0.06414				0.39994	0.22525	0.10919
						0.12774	0.15318	0.08759	0.06320	0.19442	0.03662			0.55636				0.82462	1.01980	0.61244	11.31587	0.27064	0.02840	0.34307		0.84560	0.49351	0.05454	0.04547				0.44742	0.28892	0.09081
						0.07741	0.09906	0.06714	0.08759	0.14823	0.03662			0.67440				1.24139	1.72105	1.66667	5.01705	0.20000	0.14216	0.24810		0.92988	0.58744	0.05178	0.06744				0.78706	0.14658	0.21965
						0.08760	0.09572	0.04838	0.05178	0.16974	0.03662			0.57454				1.89583	0.71706	0.47156	4.53797	0.21651	0.40939	0.22764		0.58096	0.60206	0.11393	0.05651				0.57963	0.22848	0.20000
						0.13407	0.07149	0.05928	0.08274	0.24582	0.11179			0.35646				1.13857	0.48294	0.50000	3.74402	0.08294	0.29490	0.38809		0.23863	0.69592	0.08059	0.04398				1.07409	0.10114	0.14202
						0.12169	0.06315	0.02267	0.03421	0.32403	0.06714			0.15410				2.86744	0.28294	0.32773	2.15407	0.79206	0.91965	0.55947		0.25776	0.65561	0.06454	0.05207				0.89428	0.19999	0.10919
						0.11394	0.06459	0.01850	0.05923	0.37455	0.07066			0.08066				3.13249	0.51706	0.44839	1.93203	0.82108	0.92889	0.48917		0.60265	0.65203	0.13392	0.03207				0.74952	0.10369	0.13649
						0.11244	0.13026	0.01853	0.18197	0.42396	0.08938			0.28532				3.29717	0.08294	0.21651	2.86356	0.48995	0.52211	0.42981		0.79000	0.58362	0.17400	0.03607				0.28283	0.22845	0.36608
						0.07726	0.05342	0.03662	0.24031	0.45574	0.17698			0.31800				3.47340	0.60571	0.20000	3.27236	0.44720	0.44190	0.46419		0.85101	0.85340	0.09570	0.05669				0.52988	0.22705	0.23678
						0.01838	0.10786	0.08065	0.23400	0.42396	0.11405			0.20829				3.49858	0.63246	0.44839	4.49444	0.14347	0.78379	0.23907		0.80935	0.88490	0.17685	0.03336				0.10863	0.35751	0.17762
						0.03469	0.21258	0.05955	0.20440	0.32324	0.17017			0.18218				2.46420	0.23174	0.77021	6.00926	1.04906	0.49692	0.08066		0.41499	1.02447	0.22197	0.05492				0.10915	0.36164	0.21971
						0.07099	0.17296	0.06339	0.14075	0.33765	0.27495			0.23866				1.96088	0.31706	0.30620	6.80294	0.95255	0.19982	0.17303		0.18747	1.25129	0.22197	0.03355				0.09100	0.36164	0.21983
						0.06305	0.17316	0.06729	0.01871	0.29450	0.32339			0.11394				1.44222	0.25000	0.35367	7.06176	1.11706	0.51038	0.26714		0.22787	1.29573	0.09659	0.03455				0.35295	0.28322	4.502367e-5
						0.11413	0.13408	0.05475	0.08381	0.32821	0.30028			0.09585				0.82108	0.13823	0.93286	7.41674	0.82107	0.40851	0.14693		0.33783	1.04280	0.14830	0.01364				0.35279	0.28358	0.21958
						0.06363	0.12987	0.06321	0.09579	0.11179	0.38934			0.03160				0.66337	3.34996	0.49140	7.70146	0.90907	0.23174	0.11033		0.32534	1.08842	0.12708	0.04855				0.44672	0.36116	0.27443
						0.06447	0.08282	0.05349	0.08928	0.25776	0.22787			0.27140				1.20570	2.14068	0.10367	7.94241	0.72111	0.40812	0.20424		0.59941	0.50154	0.03160	0.02284				0.56550	1.30732	0.33312
						0.06698	0.10670	0.02264	0.09667	0.21284	0.26622			0.37423				1.18652	1.57050	0.23174	1.61553	1.00000	0.28294	0.30021		0.57126	0.40594	0.09908	0.05296				0.50547	1.30732	4.45404
						0.03415	0.17225	0.04472	0.09981	0.26058	0.30028			0.55636				1.83864	1.39792	0.44721	0.75713	0.68294	0.25014	0.14405		0.26443	0.29138	0.21438	0.04984				0.36822	1.16166	0.18199
						0.13439	0.09721	0.08052	0.17957	0.24642	0.31600			0.63985				3.01882	1.63140	0.28284	1.15445	1.10125	0.69463	0.21368		0.18426	0.25776	0.30982	0.04592				0.22786	1.08042	0.13649
						0.02306	0.08771	0.03418	0.10946	0.38680	0.26567			0.64434				3.63439	0.72111	0.00000	2.69782	1.49243	0.66667	0.55187		0.08065	0.03160	0.32616	0.10105				0.14202	0.81413	5.807065e-9
						0.06724	0.08065	0.03161	0.11388	0.31758	0.30169			0.54550				3.61247	0.75295	0.08294	2.69038	2.49528	0.38275	0.62551		0.08170	0.28903	0.37988	0.08054				0.09081	0.21983	0.31063
						0.09655	0.09127	0.06591	1.072190e-4	0.29811	0.17315			0.51933				4.62740	0.85660	0.33798	1.31967	1.34385	0.44721	0.59034		0.09313	0.13029	0.35734	0.05722				2.820547e-7	0.21983	0.20000
						0.14155	0.01850	0.03158	0.06734	0.19986	0.25672			0.57905				3.49857	1.95762	0.32773	2.02498	1.93203	0.44721	0.33939		0.09993	0.14773	0.30506	0.02151				3.769396e-9	0.22043	0.32225
						0.12408	0.06562	0.15208	0.14084	0.22345	0.55954			0.65457				2.72029	2.02015	0.44839	2.00998	1.13743	1.49928	0.32533		0.06585	0.22087	0.13597	0.01483				0.09081	0.28370	0.32225
						0.14760	0.05962	0.12182	0.08275	0.24853	0.65602			0.62724				0.80000	1.70511	0.21651	2.33866	0.80000	2.23039	0.17017		0.02267	0.18960	0.16113	0.02405				0.20000	0.22785	0.21965
						0.10348	0.01853	0.04105	0.15304	0.24680	0.79942			0.72709				0.14347	0.20000	0.37487	2.23607	0.66337	2.52677	0.15410		0.09659	0.20270	0.30899	0.09658				0.10919	0.28285	0.09081
						0.07099	0.03160	0.19785	0.17162	0.20880	0.87769			0.59828				1.49636	0.48995	0.66337	2.28594	1.16412	2.80713	0.16449		0.12775	0.08938	0.32365	0.18963				0.21965	0.28285	0.09081
						0.01805	0.11897	0.19228	0.10722	0.15050	0.83665			0.54069				1.21699	0.30620	0.70752	2.12100	1.72047	3.38389	0.09585		0.02616	0.15800	0.40594	0.06537				0.44721	0.36506	0.15442
						0.03370	0.11168	0.27098	0.04426	0.07085	0.71293			0.70926				1.41631	0.23174	0.62708	1.60215	1.16619	3.10483	0.01746		0.11244	0.33472	0.44712	0.06338				0.14202	0.22408	3.244200e-8
						0.04453	0.13700	0.08187	0.02267	0.01310	0.91694			0.77957				0.55440	0.14347	1.00000	0.80852	1.54099	2.77849	0.06476		0.11244	0.52789	0.47462	0.06411				0.20000	0.30929	0.15442
						0.01877	0.12973	0.23909	0.16436	0.05178	0.55570			0.59117				0.51042	0.21651	0.68298	0.65372	1.23093	3.67696	0.08000		0.03421	0.75207	0.41884	0.27139				0.21965	0.22670	0.10919
						0.03418	0.06585	0.05923	0.08070	0.02267	0.34767			0.58509				0.27064	1.44222	0.44721	0.46859	1.96977	3.31059	0.01414		0.03160	0.78752	0.34034	0.30217				0.15442	0.28281	0.10919
						0.09875	0.07851	0.03662	0.07066	0.06454	0.22867			0.62168				0.00000	1.60078	0.40013	0.86177	1.48294	3.30825	0.08179		0.07066	0.89208	0.32821	0.34835				0.29081	0.31769	0.20000
						0.14257	0.14304	0.04659	0.08259	0.01310	0.31395			0.59428				3.22972	2.08110	0.55972	1.65041	1.45602	3.57946	0.05105		0.08259	0.74125	0.38221	0.31993				0.30919	0.20000	0.20000
						0.14659	0.11554	0.10329	0.06585	0.03662	0.20810			0.33045				2.64836	1.34753	0.74443	1.06066	1.87045	3.57693	0.15896		0.04659	0.60654	0.38652	0.31886				0.14202	0.13890	0.32791
						0.23683	0.05475	0.02267	0.12973	0.07064	0.06454			0.31978				2.75965	1.54756	0.71162	1.02320	1.61553	3.66927	0.02247		0.06320	0.49351	0.39923	0.09942				0.21965	0.13890	0.10919
						0.20063	0.01850	0.07742	0.14133	0.06320	0.06585			0.40285				3.49538	1.05186	0.67862	0.08294	1.80490	1.86554	0.08355		0.07066	0.31915	0.32324	0.10392				0.14202	0.21920	0.22787
						0.18819	8.596353e-17	0.03160	0.11394	0.09480	0.07066			0.37298				4.21125	0.40000	0.28284	0.88682	0.91405	2.23607	0.07061		2.915619e-16	0.23643	0.49857	0.09513				0.21965	0.13292	0.22787
						0.21354	0.23005	0.17698	0.08759	0.06320	0.04470			0.44593				3.57880	0.88682	0.23174	0.30620	1.77271	2.32213	0.03462		0.01853	0.23694	0.62788	0.03317				0.22787	0.09533	0.28483
						0.31133	0.16575	0.23970	0.07104	0.05472	0.14830			0.53634				3.60555	0.93814	0.23174	0.11706	3.58276	3.23081	0.19581		0.01853	0.06320	0.66369	0.03534				0.09081	0.14785	0.37978
						0.23433	0.05923	0.24680	0.06585	0.02265	0.11244			0.65358				3.24106	1.51030	0.60571	0.66337	3.97395	5.66392	0.29061		0.05923	0.04659	0.60533	0.01521				0.09081	0.11072	0.33333
						0.12444	0.10289	0.33091	0.06585	0.02616	0.13407			0.43900				2.47959	0.58941	0.21651	0.44721	5.96119	3.41762	0.12048		1.090409e-16	0.09570	0.61604	0.03011				0.30919	0.09876	0.25000
						0.07053	0.06322	0.23689	0.03662	0.06585	0.23643			0.34046				1.18652	0.90819	0.78403	0.84853	4.41773	3.56994	0.16786		0.10481	0.17685	0.44490	0.04486				0.30919	0.14481	0.20000
						0.06010	0.15793	0.23290	0.03160	0.05923	0.26058			0.10938				0.48294	0.36086	0.44721	1.12577	3.73149	4.04969	0.22345		0.05923	0.31395	0.23689	0.06563				0.60985	0.14481	0.29081
						0.11429	0.06697	0.14132	0.05340	0.05922	0.36620			0.07802				0.21651	2.86744	1.28062	1.53594	1.38321	4.10508	0.16907		0.22345	0.26058	0.16867	0.04672				0.35294	1.110528e-16	0.10919
						0.12727	3.501721e-16	0.21198	0.03662	0.02615	0.15808			0.06557				0.20000	2.10184	1.41421	1.89353	2.52500	3.40201	0.14511		0.17650	0.26590	0.15901	0.04875				0.28284	0.10185	2.419271e-8
						0.20946	0.14487	0.21284	0.07066	0.03662	0.35330			0.05105				0.34649	2.20907	1.44222	2.46735	2.54865	4.33555	0.04469		0.28500	0.13950	0.30370	0.10185				0.32784	0.20000	0.12842
						0.07911	0.08494	0.21404	0.07851	0.04469	0.29400			0.09480				0.40851	2.32568	1.23093	2.68820	2.47386	2.32002	0.03160		0.48907	0.34181	0.17876	0.09055				0.41452	0.21821	0.30466
						0.10118	0.15854	0.22164	0.03160	0.03662	0.36560			0.07734				0.66337	0.44721	1.12577	3.02624	4.04475	2.31391	0.03610		0.40405	0.20114	0.23863	0.11391				0.44722	0.21821	0.49081
						0.02082	0.10498	0.22787	1.045556e-24	0.02267	0.14765			0.25320				1.34164	0.32773	0.14347	3.02477	5.53154	2.12638	0.04469		0.28709	0.26152	0.05277	0.07984				0.32791	0.22411	0.40000
						0.01723	0.05923	0.08065	0.03662	0.17017	0.33392			0.30516				2.22273	1.16619	0.93862	3.38554	4.27551	1.00000	0.02247		0.47124	0.30832	0.04917	0.10011				0.56569	0.13505	0.45896
						0.03975	0.03160	0.07066	0.07066	0.44266	0.10870			0.34349				2.20311	2.00000	0.77086	2.68742	4.36807	1.85183	0.01746		0.35734	0.38449	0.18001	0.01684				0.10920	0.08843	0.22787
						0.03718	0.06320	0.03662	0.08065	0.36987	0.03421			0.36506				2.60573	2.80000	1.56894	0.74536	4.42719	1.60954	0.01414		0.26778	0.27161	0.14395	0.03540				0.14196	0.70940	0.12842
						0.02617	0.05340	0.04659	0.05340	0.42474	0.17546			0.36217				3.33620	1.61033	2.05696	0.51063	2.26167	1.28842	0.04906		0.36030	0.35330	0.14866	0.11394				0.20009	0.90498	0.09081
						0.02267	0.07851	0.25539	0.04469	0.37817	0.41004			0.14132				0.27592	1.56357	1.16119	0.34649	1.44222	1.21880	0.01414		0.36396	0.23503	0.05475	0.12752				0.14246	0.80007	0.20000
						0.01850	0.06585	0.09993	0.04659	0.39895	0.38403			0.23929				0.00000	0.27535	0.66337	0.48995	1.23804	1.62902	0.03610		0.26964	0.28264	0.13660	0.11393				0.31085	0.90499	0.35460
						0.03421	0.05923	0.04838	0.04469	0.11330	0.51254			0.20604				0.16555	0.75018	0.37487	0.80852	1.06751	0.92608	0.01414		0.27269	0.17161	0.05474	0.03161				0.29205	1.00092	0.10919
						0.04470	0.01310	0.06842	0.03421	0.09480	0.46010			0.33013				0.42495	0.23143	0.69292	0.61131	1.38073	0.51980	0.02247		0.25357	0.14773	0.05475	0.06703				0.22820	0.41342	0.10919
						0.04469	9.302798e-17	0.08274	0.01850	0.17017	0.45126			0.21357				0.11729	0.19996	0.53051	0.40000	2.10620	0.91706	0.03610		0.02267	0.16634	0.06585	0.05793				0.15484	0.40002	0.15442
						0.04838	0.01850	0.19133	0.02616	0.08169	0.16575			0.23601				0.00000	0.34665	1.08925	0.34649	1.61553	0.88793	0.05207		0.03160	0.18347	0.14490	0.05603				0.21927	0.21930	0.10919
						0.03160	0.03662	0.01850	0.01850	0.04467	0.27269			0.23234				0.27592	0.63246	1.20000	0.63246	8.65384	0.93447	0.01746		0.05475	0.20229	0.08759	0.11012				0.21955	0.21926	1.399369e-8
						0.03160	0.04469	0.08065	0.01850	0.04662	0.42313			0.06476				0.80490	0.44702	1.59972	0.61131	8.79275	1.23804	0.07066		0.03662	0.21438	0.12775	0.01678				0.09161	0.58225	1.224449e-8
						0.01850	0.02616	0.03160	0.05010	0.13029	0.59629			0.03610				0.80490	0.44638	1.44528	0.52271	6.85195	0.28284	0.06557		0.06454	0.09908	0.14649	0.05473				0.21979	0.79117	0.14202
						0.03160	0.01850	0.07630	0.05475	0.13032	0.30526			0.03462				0.80490	0.40829	1.31377	0.77021	6.76238	0.82108	0.03160		0.08844	0.10329	0.13029	0.11144				0.22755	0.90046	0.09081
						0.04659	0.03160	0.03662	0.16109	0.07069	0.46756			0.03163				1.13104	0.73953	1.37398	1.00050	5.50788	0.31706	0.02000		0.14773	0.08759	0.05474	0.12469				0.22782	0.44761	0.22787
						0.03160	0.06585	0.06585	0.19472	0.03434	0.36987			0.01746				1.45149	0.90907	1.56205	0.74443	4.87032	0.27064	0.08355		0.15050	0.17829	0.09313	0.12483				0.15438	0.44760	0.28284
						0.05178	0.07066	0.03160	0.19218	0.03421	0.25477			0.02469				1.45602	0.62721	1.40281	1.13483	6.02993	1.04513	0.03462		0.15808	0.12708	0.13407	0.23243				0.30905	0.23318	0.28284
						0.03160	0.06454	0.07066	0.20644	0.22997	0.19561			0.02247				1.64221	1.21448	1.45602	1.20286	8.27528	6.19255	0.24368		0.16867	0.27901	0.08376	0.12679				0.19998	0.22180	0.28284
						0.03421	0.13597	0.04659	0.24266	0.49276	0.31677			0.02247				1.66667	0.28285	1.43545	1.41421	7.67391	9.88867	0.23005		0.22378	0.20880	0.14126	0.06207				0.21965	0.40072	0.22787
						0.05923	0.15331	0.01853	0.05928	0.79420	0.36030			0.02247				1.74843	0.20046	1.08925	1.41421	3.55334	9.14261	0.26058		0.03421	0.29013	0.24066	0.05619				0.35294	0.30386	0.12842
						0.01853	0.19005	0.04469	0.03169	0.75292	0.38573			0.02247				1.67981	0.57772	0.72184	2.00998	3.61233	11.79000	0.25679		0.07851	0.42293	0.12640	0.01761				0.35294	0.63245	0.11351
						0.01850	0.04838	0.08938	0.02280	0.98088	0.33392			0.02247				1.61245	0.73663	0.40000	1.72982	3.27936	15.29706	0.30575		0.15331	0.47225	0.22159	0.06773				0.18162	0.63336	0.15135
						0.01850	0.13029	0.04659	0.04471	0.83923	0.59623			0.08189				2.42085	2.28520	0.27065	1.86554	3.61110	12.89532	0.11226		0.19005	0.47799	0.24005	0.03473				0.22787	0.54236	0.25737
						0.03160	0.10790	0.03662	0.03473	0.55258	0.78668			0.09272				1.20578	0.52844	0.51033	1.79505	2.54865	9.09711	0.15095		0.20758	0.57665	0.06342	0.04966				0.09265	0.66110	0.13649
						0.11547	0.01310	0.06585	0.05928	0.43018	0.94467			0.07802				1.64935	0.42248	0.36086	1.89572	2.58477	8.99723	0.14386		0.19480	0.56401	0.04469	0.07805				0.09081	0.31408	0.15442
						0.10715	0.02616	0.11244	0.01872	0.73404	1.04483			0.07802				1.00000	0.21651	1.10505	1.60078	2.21041	5.49351	0.15800		0.23467	0.59374	0.08187	0.09006				0.12842	0.09618	0.15442
						0.08487	0.01310	0.24853	0.01319	0.48132	1.10928			0.09993				0.23174	0.56569	0.30620	1.14342	2.88444	3.64741	0.14054		0.04469	0.53479	0.05923	0.08979				0.14202	0.20029	0.22787
						0.16630	0.07085	0.27183	0.04474	0.40884	0.80123			0.03462				0.28284	0.21651	0.29484	0.71706	2.65367	6.16268	0.17592		0.14773	0.39971	0.12388	0.10150				0.28284	0.14154	0.20000
						0.02613	0.12775	0.24612	0.03694	0.41201	0.54668			0.01414				1.21656	0.51042	0.08294	0.95255	2.23039	9.80208	0.11948		0.16634	0.51903	0.07741	0.03474				0.32791	0.21350	0.30919
						0.03424	0.09480	0.43906	0.05037	0.24612	0.35278			0.02000				2.32972	0.49692	0.31706	0.30620	1.00683	9.75681	0.11394		0.16974	0.52652	0.21077	0.03562				0.21965	0.20000	0.25000
						6.683811e-5	0.09570	0.37507	0.05929	0.05475	0.28152			0.01414				2.16405	0.42495	1.00000	0.40000	0.33798	13.51111	0.06320		0.18347	0.63278	0.29050	0.04463				0.10919	0.31151	0.33333
						0.04463	0.09480	0.22378	0.07751	0.09480	0.30618			0.01746				0.36086	0.20000	0.00000	0.44721	0.65372	1.19510	0.06937		0.19050	0.63200	0.11179	0.03484				0.12842	0.31151	2.52784
						0.06319	0.12169	0.27286	0.12514	0.09908	0.32226			0.04788				0.10353	0.00000	0.68298	0.00000	0.42495	1.14633	0.01414		0.15800	0.60123	0.11244	0.01466				3.189471e-8	0.09517	4.65465
[truncated: 3,149 more rows]

## Sheet: Velocity distributions
PAO1 WT - Normalized velocity distributions E1=2.7 kPa E2= 6.5 kPa E3=18.5 kPa E4=65 kPa E5=84 kPa replicate positions were pooled to obtain a single velocity distribution per hydrogel (scaling factor=0,158 µm/pix)
[truncated: 50 more rows]

[truncated: 1 more sheets: Vc]
